# Supplementary material for: Structure-Based Virtual Screening and Functional Validation of Potential Hit Molecules Targeting the SARS-CoV-2 Main Protease
Source: Biomolecules. 2022 Nov 25;12(12):1754. doi: 10.3390/biom12121754 (PMC9775371; doi:10.3390/biom12121754)
Supplement: Supplementary file 1 [file biomolecules-12-01754-s001.zip]

Archive with 4 entries (4 files):
- Supplement_information.pdf
- Supplemental_Table_S1.xlsx
- Supplemental_Table_S3.pdf
- Supplemental_Table_S4.xlsx
