# Supplementary material for: Structure-Based Virtual Screening and Functional Validation of Potential Hit Molecules Targeting the SARS-CoV-2 Main Protease
Source: Biomolecules. 2022 Nov 25;12(12):1754. doi: 10.3390/biom12121754 (PMC9775371; doi:10.3390/biom12121754)
Supplement: Supplementary file 1 [file biomolecules-12-01754-s001.zip › Supplement_information.pdf]

## Structure-Based Virtual Screening and Functional Validation of Potential Hit Molecules Targeting the SARS-CoV-2 Main Protease

Balasubramanian Moovarkumudalvan<sup>1\*</sup>, Anupriya Madhukumar Geethakumari<sup>2</sup>, Ramya Ramadoss<sup>3</sup>, Kabir H Biswas<sup>2</sup> and Borbala Mifsud<sup>1,4\*</sup>

<sup>1</sup>Division of Genomics and Translational Biomedicine

<sup>2</sup>Division of Biological and Biomedical Sciences

College of Health and Life Sciences, Hamad Bin Khalifa University  
Qatar Foundation, Education City, PO Box 34110. Doha, Qatar.

<sup>3</sup>Biological Sciences, Carnegie Mellon University - Qatar  
Qatar Foundation, Education City, PO Box 24866. Doha, Qatar.

<sup>4</sup>William Harvey Research Institute, Queen Mary University of London, Charterhouse Square, EC1M 6BQ, London, UK

\*Corresponding Authors: bmoovarkumudalvan@gmail.com, bmifsud@hbku.edu.qa

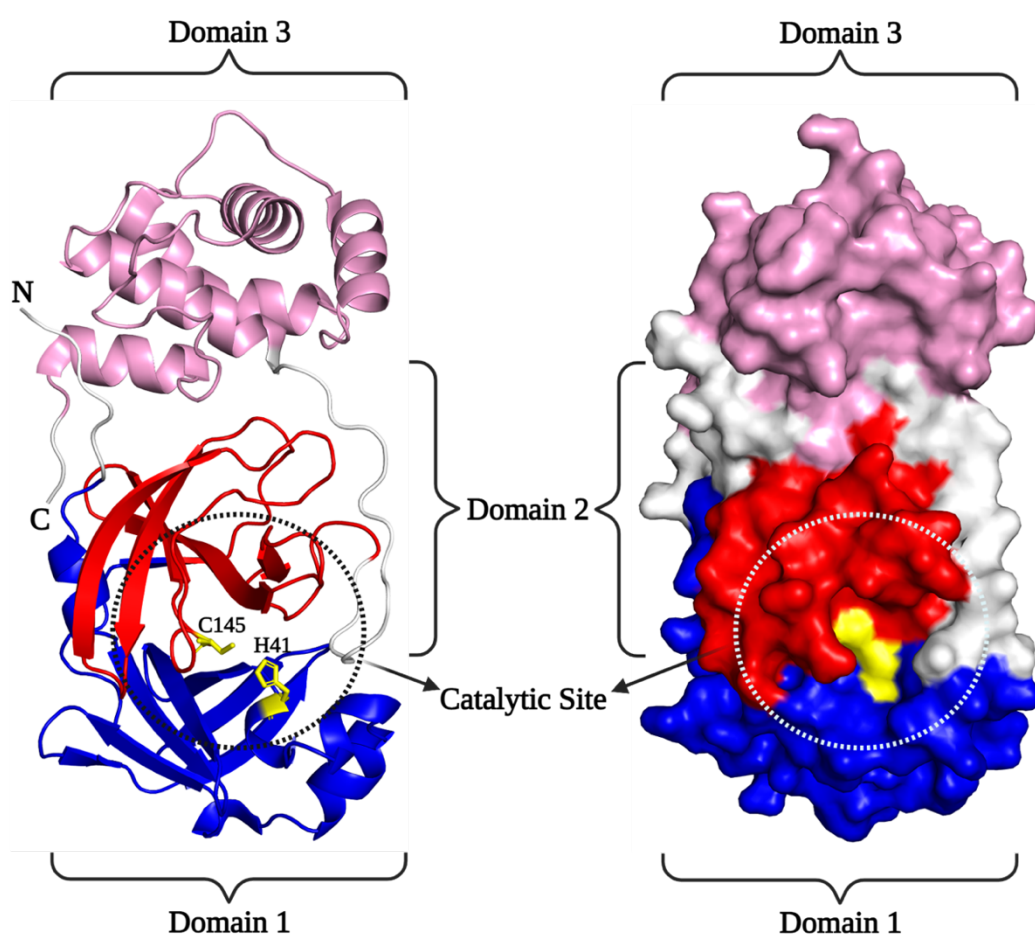

**Figure S1.** Ribbon (Left) and surface view (Right) of crystal structure of free enzyme SARS-CoV-2 Main Protease (M<sup>pro</sup>) (PDB code: 6Y2E) with three distinct domains (Domains I, II, and III). Domains I (blue) and II (red), comprised of residues 8–101 and 102–184, respectively, are made up of six antiparallel  $\beta$ -barrels. An antiparallel globular cluster of five  $\alpha$  helices forms domain III (pink, residues 201–303) which is connected to domain II *via* a long loop region (cyan, residues 185–200). Active site (highlight by dotted circle) is located in between domains I & II and the His41-Cys145 catalytic dyad is represented in yellow.

| S.No | e-Drug3D-library |                                              | Drugs-library                    |                                              | NP-library                              |                                              |
|------|------------------|----------------------------------------------|----------------------------------|----------------------------------------------|-----------------------------------------|----------------------------------------------|
|      | Drug Name        | Calculated Binding Affinity Score (kcal/mol) | Drug Name                        | Calculated Binding Affinity Score (kcal/mol) | Drug Name                               | Calculated Binding Affinity Score (kcal/mol) |
| 1    | Paritaprevir     | -11.6                                        | Ecopladib<br>ZINC000085536974    | -9.8                                         | MolPort-001-742-110<br>ZINC000043552589 | -10.3                                        |
| 2    | Olmesartan       | -10.4                                        | Flezelastine<br>ZINC000003785445 | -9.7                                         | MolPort-039-052-621<br>ZINC000044404209 | -10.1                                        |
| 3    | Voxilaprevir     | -10                                          | Velpatasvir<br>ZINC000203686879  | -9.3                                         | MolPort-035-705-955<br>ZINC000003594862 | -9.6                                         |
| 4    | Tecovirimat      | -9.8                                         | Piperaquine<br>ZINC000026251015  | -9.3                                         | MolPort-005-909-605<br>ZINC000036368151 | -9.4                                         |
| 5    | Glecaprevir      | -9.6                                         | Lomitapide<br>ZINC000027990463   | -9.3                                         | MolPort-020-005-943<br>ZINC000031350059 | -9.4                                         |
| 6    | Ledipasvir       | -9.3                                         | Ar-12<br>ZINC000003960083        | -9.3                                         | MolPort-000-741-311<br>ZINC000253502228 | -9.3                                         |
| 7    | Losartan         | -9.2                                         | Niceverine<br>ZINC000001481885   | -9.3                                         | MolPort-001-740-100<br>ZINC000000603253 | -9.2                                         |
| 8    | Grazoprevir      | -9.1                                         | Elbasvir<br>ZINC000150588351     | -9.1                                         | MolPort-039-141-993<br>ZINC000015205931 | -9.2                                         |
| 9    | Pibrentasvir     | -9.1                                         | Vidupiprant<br>ZINC000043206238  | -9.1                                         | MolPort-002-507-280<br>ZINC000012890906 | -9.1                                         |
| 10   | Velpatasvir      | -9.1                                         | Astemizole<br>ZINC000000601274   | -9                                           | MolPort-044-183-452<br>ZINC000101104515 | -9.1                                         |
| 11   | Ciclesonide      | -9                                           | Grazoprevir<br>ZINC000095551509  | -9                                           | MolPort-027-835-585<br>ZINC000004027386 | -9.1                                         |
| 12   | Telmisartan      | -9                                           | Hesperidin<br>ZINC000008214774   | -9                                           | MolPort-035-706-482<br>ZINC000014766825 | -9.1                                         |
| 13   |                  |                                              | Ledipasvir<br>ZINC000150338819   | -9                                           | MolPort-002-526-280<br>ZINC000253498755 | -9                                           |
| 14   |                  |                                              | Ravidasvir<br>ZINC000150607150   | -9                                           | MolPort-001-741-064<br>ZINC000067902988 | -9                                           |
| 15   |                  |                                              |                                  |                                              | MolPort-039-141-993<br>ZINC000015205928 | -9                                           |
| 16   |                  |                                              |                                  |                                              | MolPort-001-740-946<br>ZINC000004654620 | -9                                           |
| 17   |                  |                                              |                                  |                                              | MolPort-002-527-314<br>ZINC000004082225 | -9                                           |
| 18   |                  |                                              |                                  |                                              | MolPort-001-768-161<br>ZINC000001690209 | -9                                           |
| 19   |                  |                                              |                                  |                                              | MolPort-035-706-502<br>ZINC000049872145 | -9                                           |

**Table S2.** Short listed drug compounds after initial virtual screening.

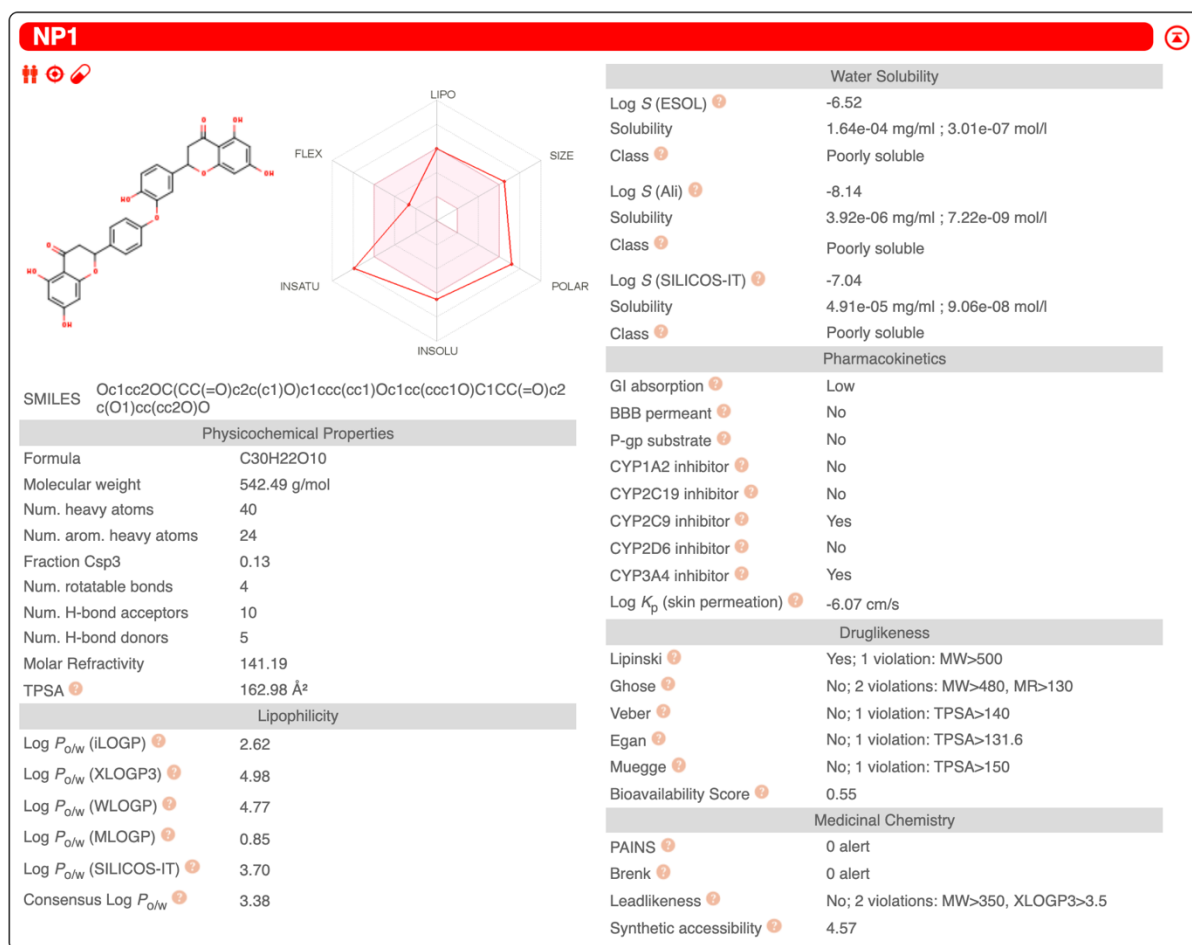

**Figure S2.** Absorption, Distribution, Metabolism, Elimination (ADME) analysis of NP1 using SwissADME webserver.

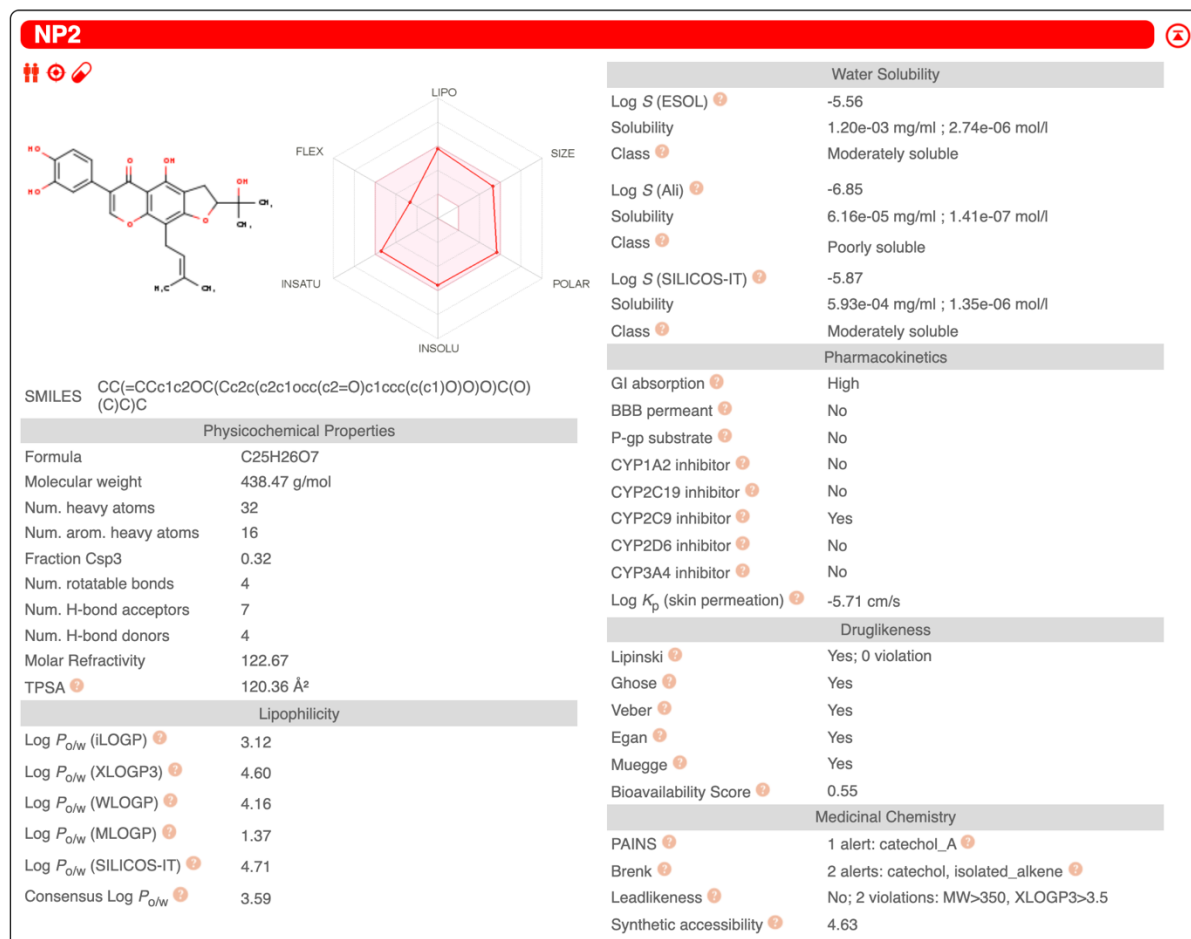

**Figure S3.** Absorption, Distribution, Metabolism, Elimination (ADME) analysis of NP2 using SwissADME webserver.

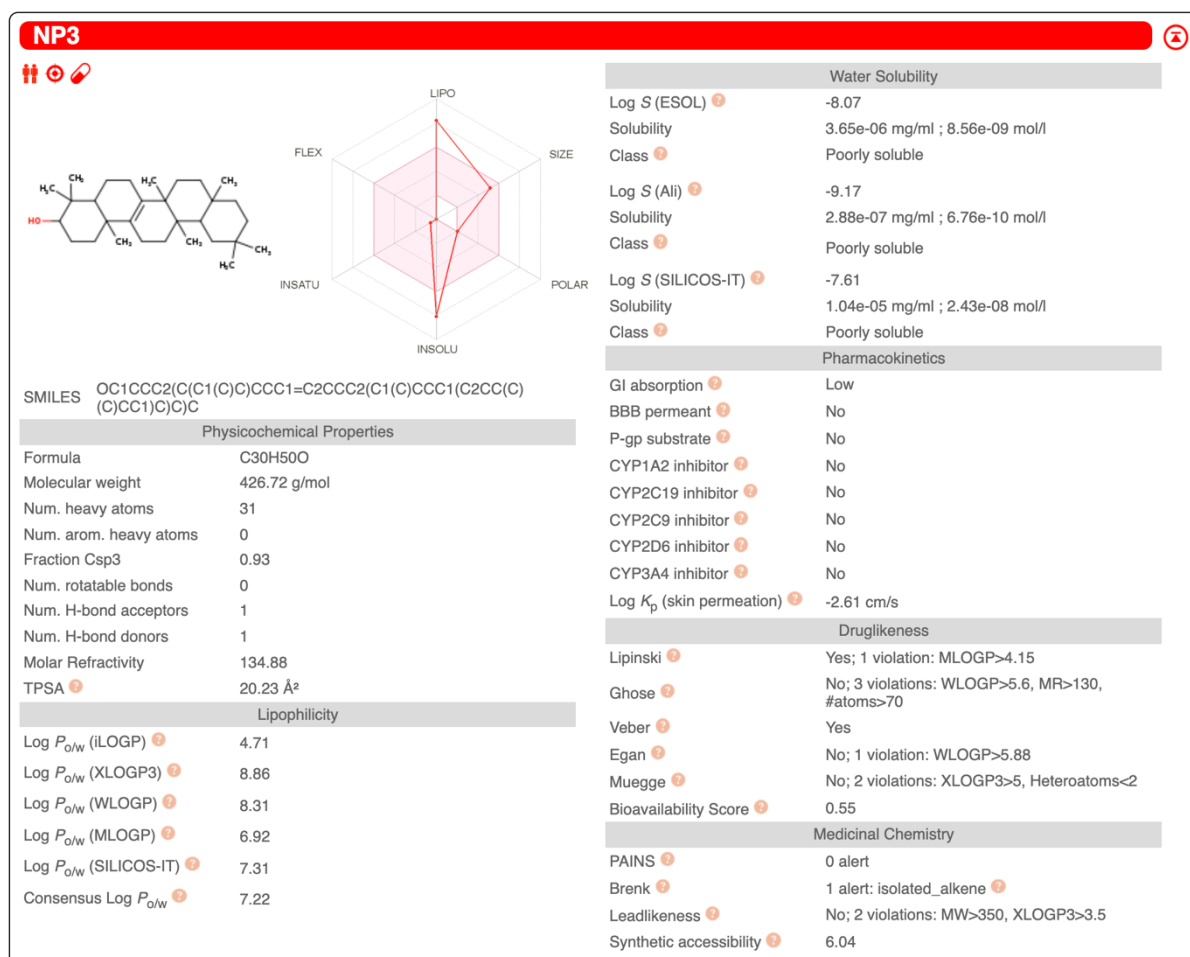

**Figure S4.** Absorption, Distribution, Metabolism, Elimination (ADME) analysis of NP3 using SwissADME webserver.

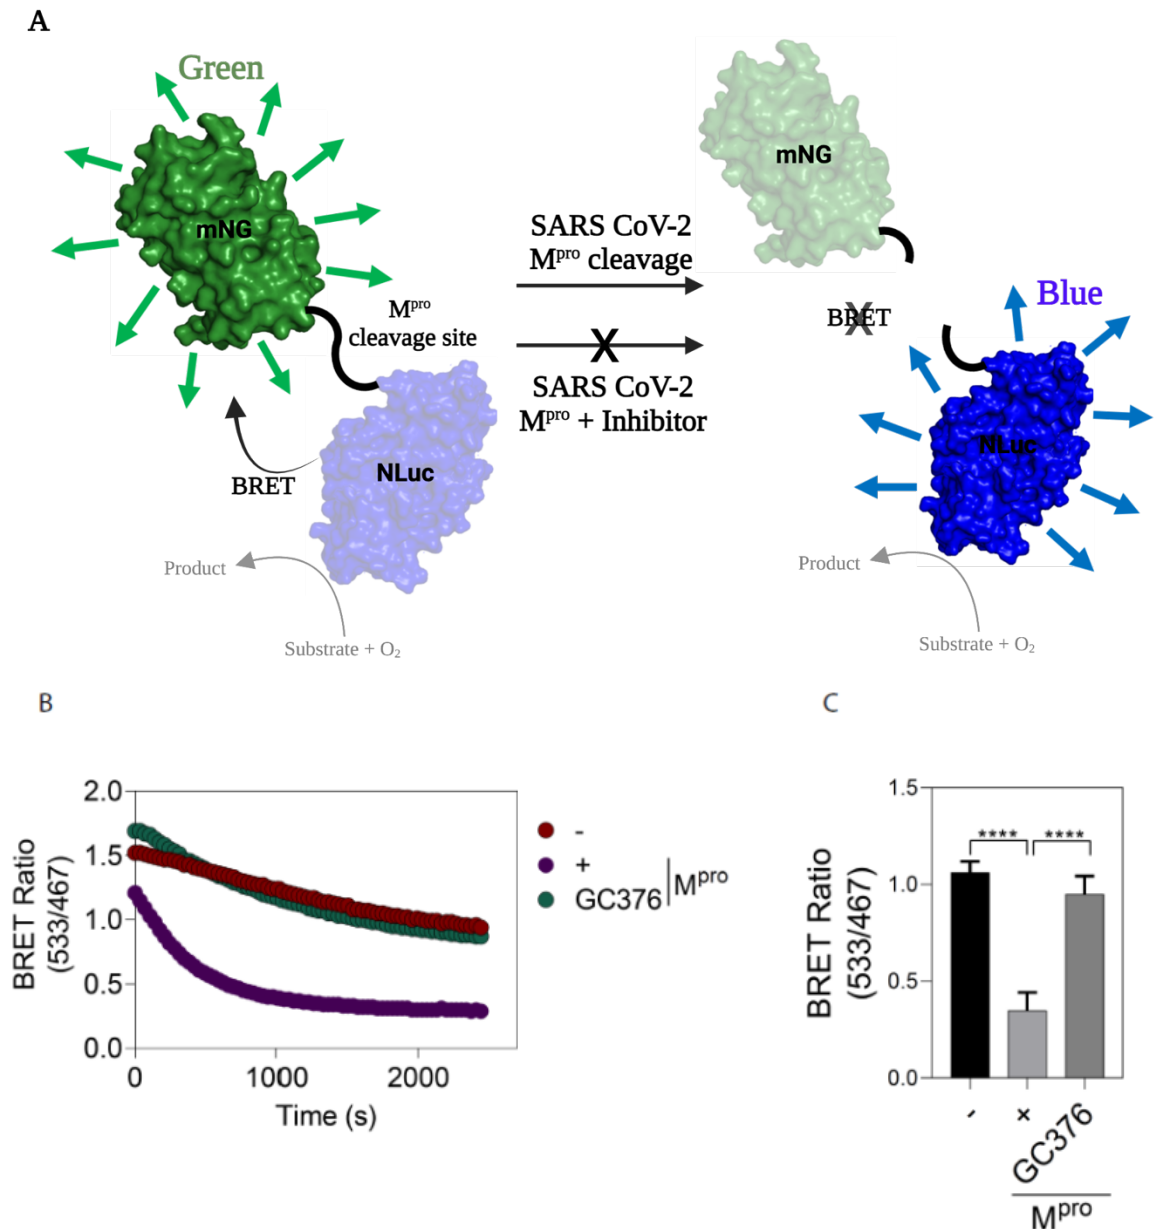

**Figure S5.** BRET-based M<sup>pro</sup> sensor for screening the pharmacological inhibition of SARS-CoV-2 M<sup>pro</sup>

(A). Schematic showing the M<sup>pro</sup> sensor function. The active M<sup>pro</sup> protease cleaves the peptide between the NanoLuciferase (NLuc) and mNeonGreen (mNG) causing a decrease in the BRET ratio whereas in presence of M<sup>pro</sup> inhibitor, the cleavage does not occur resulting in high BRET ratio.

(B). Graph showing the temporal difference in BRET ratio either in presence (purple) or absence (red) of M<sup>pro</sup> protease or in the presence of SARS-CoV-2 M<sup>pro</sup> inhibitor – GC376 (green).

(C). Graph showing the inhibition of M<sup>pro</sup> protease in presence of GC376 after 90 minutes of incubation.

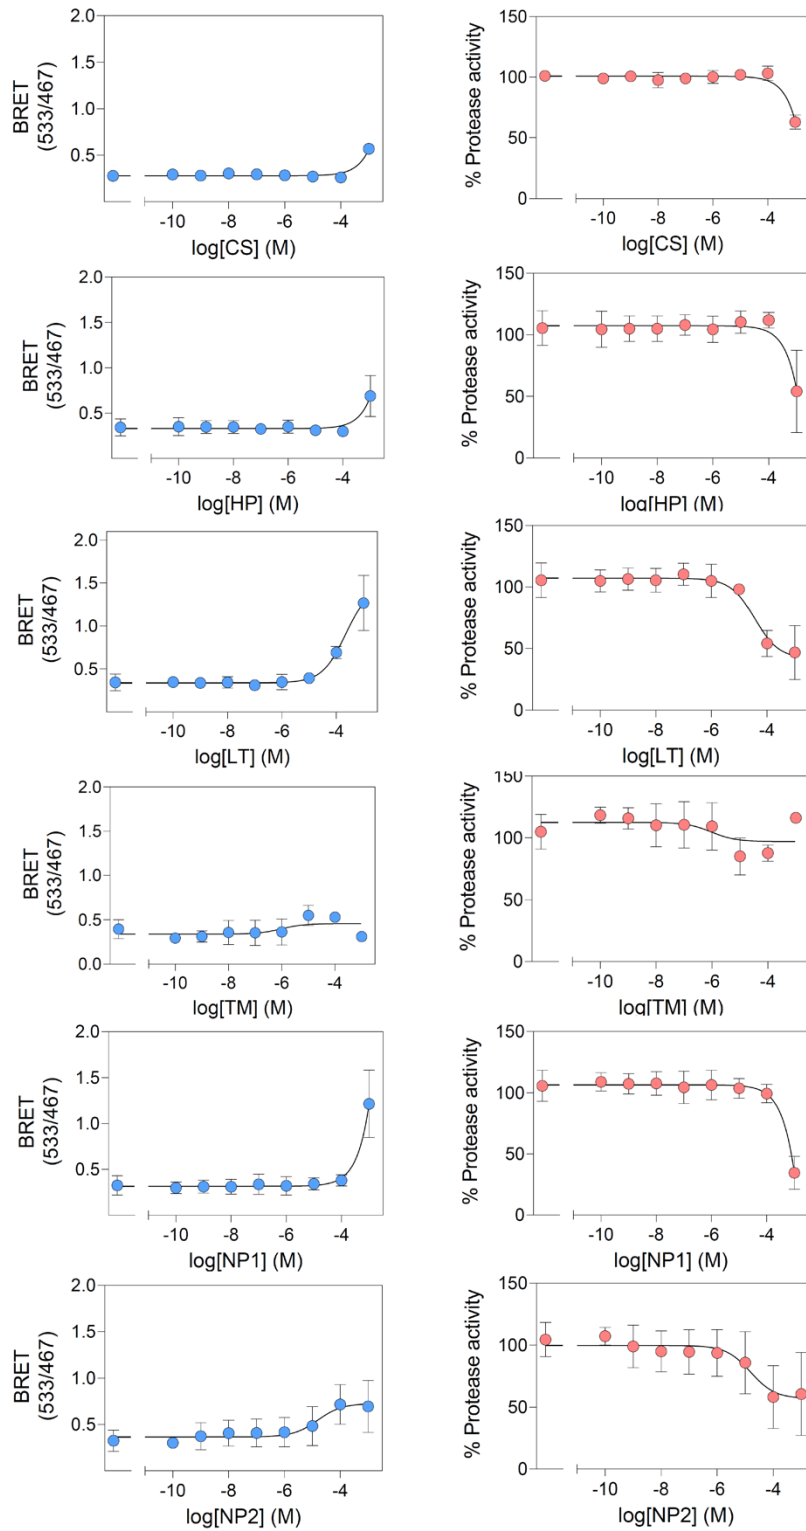

**Figure S6.** Screening of SARS-CoV-2  $M^{pro}$  inhibitors using BRET-based sensor. Graphs showing BRET ratio (Left side) for each inhibitor concentration at 30 minutes of BRET substrate addition and the difference in percentage of protease activity (Right side) in presence of each concentration of inhibitor.

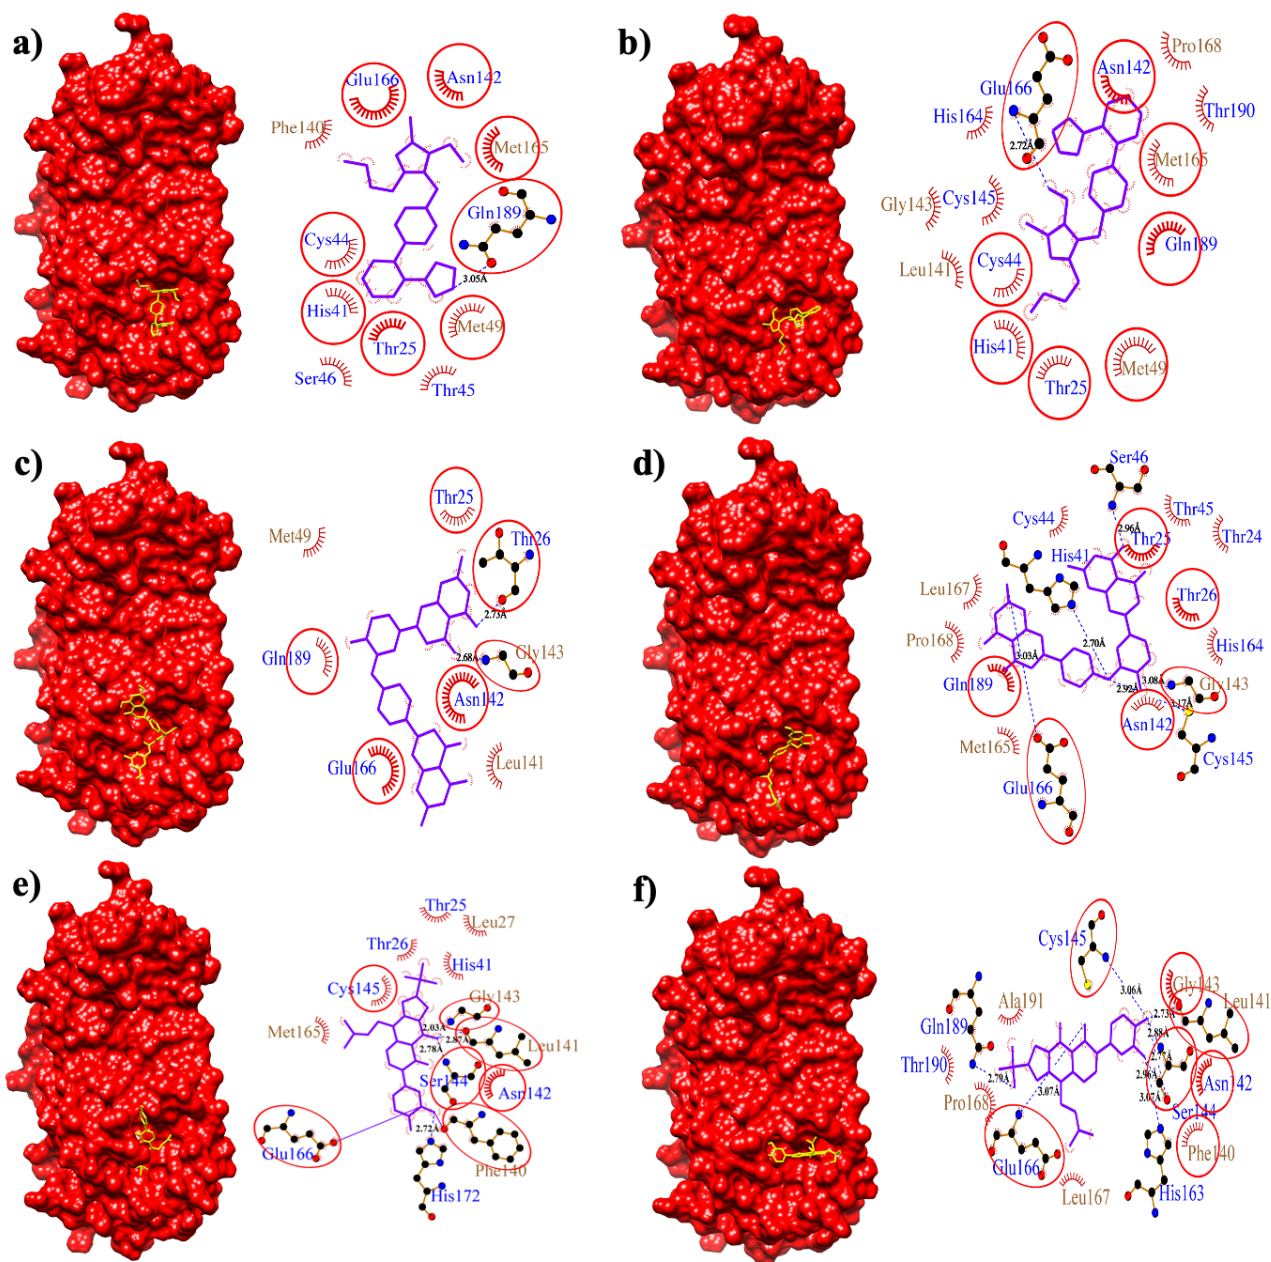

**Figure S7.** Comparison of protein-ligand docked complexes. Surface representation of SARS-CoV-2 M<sup>pro</sup> complexed with (a) Losartan, (c) NP1 and (e) NP2 derived from EDock. SARS-CoV-2 M<sup>pro</sup> complexed with (b) Losartan, (d) NP1 and (f) NP2 derived from AutoDock. Both docking simulations were done in blind docking mode. The corresponding LigPlot interaction maps (polar residue names in blue font & non-polar residue names in brown font) are shown adjacent to the complexes. Residues common among the interacting environments derived from both docking simulations are encircled in red.
