# Supplementary material for: Structure-Based Virtual Screening and Functional Validation of Potential Hit Molecules Targeting the SARS-CoV-2 Main Protease
Source: Biomolecules. 2022 Nov 25;12(12):1754. doi: 10.3390/biom12121754 (PMC9775371; doi:10.3390/biom12121754)
Supplement: Supplementary file 1 [file biomolecules-12-01754-s001.zip › Supplemental_Table_S1.xlsx]

## Sheet: e-Drug3D-lib
Compound	Model ID	Energy	nRot
PARITAPREVIR	1	-11.6	0		Drugs with Energy -9 and above are highlighted in Blue
RIFABUTIN	1	-10.8	0
VENETOCLAX	1	-10.7	0
OLMESARTAN	1	-10.4	0
FOSNETUPITANT	1	-10.1	10
TELOTRISTAT	1	-10	0
VOXILAPREVIR	1	-10	9
CAPMATINIB	1	-9.9	4
TECOVIRIMAT	1	-9.8	0
IMATINIB	1	-9.8	7
SORAFENIB	1	-9.8	0
GLECAPREVIR	1	-9.6	7
ZANUBRUTINIB	1	-9.6	0
REGORAFENIB	1	-9.6	0
NINTEDANIB	1	-9.6	0
DIGOXIN	1	-9.5	13
NILOTINIB	1	-9.5	7
SELPERCATINIB	1	-9.5	0
ENASIDENIB	1	-9.5	0
DIHYDROERGOTAMINE	1	-9.4	5
ERGOTAMINE	1	-9.4	5
AMPHOTERICIN	1	-9.4	14
SIMEPREVIR	1	-9.4	8
TRIFAROTENE	1	-9.4	0
UBROGEPANT	1	-9.4	5
BETRIXABAN	1	-9.4	0
ALECTINIB	1	-9.4	3
SONIDEGIB	1	-9.3	6
OLAPARIB	1	-9.3	4
ENTRECTINIB	1	-9.3	7
CERITINIB	1	-9.3	0
LUMACAFTOR	1	-9.3	5
PONATINIB	1	-9.3	7
LEDIPASVIR	1	-9.3	12
IRINOTECAN	1	-9.3	6
DUTASTERIDE	1	-9.3	4
ERAVACYCLINE	1	-9.2	9
LOSARTAN	1	-9.2	0
LIFITEGRAST	1	-9.2	7
ELTROMBOPAG	1	-9.2	6
SIROLIMUS	1	-9.2	9
EXATECAN	1	-9.2	3
ULIPRISTAL	1	-9.1	0
KETOCONAZOLE	1	-9.1	0
NALDEMEDINE	1	-9.1	9
MEPENZOLATE	1	-9.1	0
OXYPHENBUTAZONE	1	-9.1	0
PIBRENTASVIR	1	-9.1	17
VELPATASVIR	1	-9.1	13
M_ULIPRISTAL	1	-9.1	0
GRAZOPREVIR	1	-9.1	8
LOPERAMIDE	1	-9.1	0
METOCURINE	1	-9.1	4
ACALABRUTINIB	1	-9.1	0
ERGOLOID	1	-9.1	6
ACETYLDIGITOXIN	1	-9.1	13
CLIDINIUM	1	-9.1	0
CICLESONIDE	1	-9	7
DESLANOSIDE	1	-9	19
ETOPOSIDE	1	-9	8
OXYPHENBUTAZONE	1	-9	0
CANDICIDIN	1	-9	20
M_OZANIMOD	1	-9	4
DOXAZOSIN	1	-9	5
CLIDINIUM	1	-9	0
NANDROLONE	1	-9	5
TELMISARTAN	1	-9	7
CLOCORTOLONE	1	-8.9	6
DELAVIRDINE	1	-8.9	0
TERCONAZOLE	1	-8.9	0
DONEPEZIL	1	-8.9	0
M_MIDOSTAURIN	1	-8.9	5
DONEPEZIL	1	-8.9	0
EZETIMIBE	1	-8.9	0
M_ENTRECTINIB	1	-8.9	7
NEDOCROMIL	1	-8.9	0
UMECLIDINIUM	1	-8.9	0
TUCATINIB	1	-8.9	6
TROSPIUM	1	-8.9	0
DROSPIRENONE	1	-8.9	0
MARAVIROC	1	-8.9	8
FLUMETHASONE	1	-8.9	7
M_OZANIMOD	1	-8.8	5
DEFERASIROX	1	-8.8	2
EVEROLIMUS	1	-8.8	12
TROGLITAZONE	1	-8.8	6
RIMEGEPANT	1	-8.8	5
NATAMYCIN	1	-8.8	9
M_RIFAPENTINE	1	-8.8	10
M_OZANIMOD	1	-8.8	5
ETOPOSIDE	1	-8.8	9
LURBINECTEDIN	1	-8.8	6
DELAFLOXACIN	1	-8.8	5
AMCINONIDE	1	-8.8	5
ADAPALENE	1	-8.8	4
POSACONAZOLE	1	-8.8	13
DIGITOXIN	1	-8.8	12
DACTINOMYCIN	1	-8.8	9
TROGLITAZONE	1	-8.8	6
LENVATINIB	1	-8.8	6
EPTIFIBATIDE	1	-8.8	10
FOSTEMSAVIR	1	-8.8	8
M_MIDOSTAURIN	1	-8.8	6
CLOMIPHENE	1	-8.8	0
VEMURAFENIB	1	-8.8	7
SELINEXOR	1	-8.8	0
DACOMITINIB	1	-8.8	0
QUINUPRISTIN	1	-8.7	11
CLOMIPHENE	1	-8.7	0
AVAPRITINIB	1	-8.7	6
MONTELUKAST	1	-8.7	13
M_ENTECAVIR	1	-8.7	10
RIFAXIMIN	1	-8.7	7
RALTEGRAVIR	1	-8.7	7
PALIPERIDONE	1	-8.7	5
FLUOCINOLONE	1	-8.7	4
GLIMEPIRIDE	1	-8.7	7
MIDOSTAURIN	1	-8.7	5
TAZEMETOSTAT	1	-8.7	9
M_NETARSUDIL	1	-8.7	0
ERIBULIN	1	-8.7	6
PLICAMYCIN	1	-8.7	26
NETARSUDIL	1	-8.7	9
BROMOCRIPTINE	1	-8.7	6
ELBASVIR	1	-8.7	13
DOLUTEGRAVIR	1	-8.7	0
ABIRATERONE	1	-8.7	2
COBIMETINIB	1	-8.7	0
IVERMECTIN	1	-8.7	11
THIOTHIXENE	1	-8.6	0
MOXIDECTIN	1	-8.6	5
MEFLOQUINE	1	-8.6	0
NEBIVOLOL	1	-8.6	8
LEVOCABASTINE	1	-8.6	4
LORLATINIB	1	-8.6	1
TOLVAPTAN	1	-8.6	4
NYSTATIN	1	-8.6	14
AVATROMBOPAG	1	-8.6	7
BICTEGRAVIR	1	-8.6	4
FLUOCINONIDE	1	-8.6	5
RIFAMYCIN	1	-8.6	8
TROGLITAZONE	1	-8.6	6
VILAZODONE	1	-8.6	7
APIXABAN	1	-8.6	5
BALOXAVIR	1	-8.6	2
NOVOBIOCIN	1	-8.6	12
LETERMOVIR	1	-8.5	8
MOMETASONE	1	-8.5	6
CEFIDEROCOL	1	-8.5	16
ESTROPIPATE	1	-8.5	0
ESTRADIOL	1	-8.5	6
FINAFLOXACIN	1	-8.5	0
CARBENICILLIN	1	-8.5	7
CLOXACILLIN	1	-8.5	0
SIPONIMOD	1	-8.5	10
TIPRANAVIR	1	-8.5	13
CARBENICILLIN	1	-8.5	7
PERAMPANEL	1	-8.5	3
ISAVUCONAZONIUM	1	-8.5	16
DACLATASVIR	1	-8.5	13
LASMIDITAN	1	-8.5	4
ACRIVASTINE	1	-8.5	0
AZELASTINE	1	-8.5	3
MOXIFLOXACIN	1	-8.5	0
DASABUVIR	1	-8.5	6
PICOSULFATE	1	-8.5	0
PIMOZIDE	1	-8.5	7
DORAVIRINE	1	-8.5	0
TUBOCURARINE	1	-8.5	4
CEFTRIAXONE	1	-8.5	9
ALPELISIB	1	-8.5	5
BUCLIZINE	1	-8.5	6
GATIFLOXACIN	1	-8.4	0
M_RIPRETINIB	1	-8.4	5
ALATROFLOXACIN	1	-8.4	8
IDARUBICIN	1	-8.4	8
DOXAPRAM	1	-8.4	0
TRIAMCINOLONE	1	-8.4	7
TESTOLACTONE	1	-8.4	0
PEXIDARTINIB	1	-8.4	6
AXITINIB	1	-8.4	5
TROGLITAZONE	1	-8.4	6
EPLERENONE	1	-8.4	2
ROLAPITANT	1	-8.4	7
ESTRADIOL	1	-8.4	0
DABRAFENIB	1	-8.4	7
BITOLTEROL	1	-8.4	11
HYDROFLUMETHIAZIDE	1	-8.4	0
M_MACITENTAN	1	-8.4	0
ETHINYL	1	-8.4	0
TOLVAPTAN	1	-8.4	4
SPARFLOXACIN	1	-8.4	0
ABEMACICLIB	1	-8.4	7
IRBESARTAN	1	-8.4	7
DOXORUBICIN	1	-8.4	11
LUMATEPERONE	1	-8.4	5
ZAFIRLUKAST	1	-8.4	9
MOXALACTAM	1	-8.4	10
PALBOCICLIB	1	-8.4	5
GATIFLOXACIN	1	-8.4	0
HALCINONIDE	1	-8.4	3
HETACILLIN	1	-8.3	0
ARTESUNATE	1	-8.3	5
OZANIMOD	1	-8.3	8
BEXAROTENE	1	-8.3	3
BETA	1	-8.3	10
PIPECURONIUM	1	-8.3	6
ZOLMITRIPTAN	1	-8.3	0
ELEXACAFTOR	1	-8.3	9
INDINAVIR	1	-8.3	14
ITRACONAZOLE	1	-8.3	11
ARGATROBAN	1	-8.3	9
TRAMETINIB	1	-8.3	5
LORAZEPAM	1	-8.3	2
M_BECLOMETHASONE	1	-8.3	7
ITRACONAZOLE	1	-8.3	11
RIFAPENTINE	1	-8.3	11
CABOZANTINIB	1	-8.3	8
ARGATROBAN	1	-8.3	9
PALIPERIDONE	1	-8.3	5
DARIFENACIN	1	-8.3	7
M_CICLESONIDE	1	-8.3	5
BARICITINIB	1	-8.3	0
CEFOPERAZONE	1	-8.3	10
M_REVEFENACIN	1	-8.3	11
ZALEPLON	1	-8.2	0
DESERPIDINE	1	-8.2	9
M_DOLASETRON	1	-8.2	0
LOMITAPIDE	1	-8.2	12
OXACILLIN	1	-8.2	0
METHYLPREDNISOLONE	1	-8.2	6
TRIMETREXATE	1	-8.2	0
RIBOCICLIB	1	-8.2	5
TROVAFLOXACIN	1	-8.2	4
DEFLAZACORT	1	-8.2	5
DESONIDE	1	-8.2	4
FLUDROCORTISONE	1	-8.2	6
ELAGOLIX	1	-8.2	13
SUVOREXANT	1	-8.2	3
M_AZILSARTAN	1	-8.2	7
MECLOCYCLINE	1	-8.2	7
RISPERIDONE	1	-8.2	4
PASIREOTIDE	1	-8.2	20
TADALAFIL	1	-8.2	1
CEFPIRAMIDE	1	-8.2	10
CONIVAPTAN	1	-8.2	4
DICUMAROL	1	-8.2	4
TRIAMCINOLONE	1	-8.2	4
TESTOSTERONE	1	-8.2	5
VISMODEGIB	1	-8.2	4
LAROTRECTINIB	1	-8.2	4
BUCLIZINE	1	-8.2	6
BETAMETHASONE	1	-8.2	7
REVEFENACIN	1	-8.2	11
VORAPAXAR	1	-8.2	6
MESTRANOL	1	-8.2	0
DIFENOXIN	1	-8.2	7
TENIPOSIDE	1	-8.2	9
LAPATINIB	1	-8.2	11
OSPEMIFENE	1	-8.2	0
GLYBURIDE	1	-8.2	8
RIPRETINIB	1	-8.2	5
PARICALCITOL	1	-8.2	8
TACROLIMUS	1	-8.2	10
OPICAPONE	1	-8.2	5
MECLIZINE	1	-8.2	5
EMPAGLIFLOZIN	1	-8.2	10
EXEMESTANE	1	-8.2	0
DICLOXACILLIN	1	-8.2	0
FLUTICASONE	1	-8.2	7
PAZOPANIB	1	-8.1	6
CEFTAZIDIME	1	-8.1	10
HEXAFLUORENIUM	1	-8.1	9
DOXAPRAM	1	-8.1	0
SULFACYTINE	1	-8.1	0
MEPREDNISONE	1	-8.1	4
MECLIZINE	1	-8.1	5
PACLITAXEL	1	-8.1	17
M_FIDAXOMICIN	1	-8.1	20
DOXYCYCLINE	1	-8.1	7
GILTERITINIB	1	-8.1	9
EDOXABAN	1	-8.1	6
QUINESTROL	1	-8.1	3
PROGESTERONE	1	-8.1	0
FLURANDRENOLIDE	1	-8.1	4
DROPERIDOL	1	-8.1	6
FLURAZEPAM	1	-8.1	0
AMOXAPINE	1	-8.1	1
HALOPERIDOL	1	-8.1	7
IVACAFTOR	1	-8.1	5
FLAVOXATE	1	-8.1	6
DOXERCALCIFEROL	1	-8.1	7
FLIBANSERIN	1	-8.1	5
BALOXAVIR	1	-8.1	6
DEXAMETHASONE	1	-8.1	6
AZELASTINE	1	-8.1	3
ATOVAQUONE	1	-8.1	3
DEXAMETHASONE	1	-8.1	6
ISRADIPINE	1	-8.1	0
ELVITEGRAVIR	1	-8.1	8
ISRADIPINE	1	-8.1	0
M_DEFLAZACORT	1	-8.1	4
BENDROFLUMETHIAZIDE	1	-8.1	5
TEMSAVIR	1	-8.1	5
M_APALUTAMIDE	1	-8.1	4
INDAPAMIDE	1	-8.1	4
NERATINIB	1	-8.1	11
MOMETASONE	1	-8.1	4
INDACATEROL	1	-8.1	8
LUMEFANTRINE	1	-8.1	11
OMBITASVIR	1	-8.1	16
CALCIFEDIOL	1	-8.1	8
SAQUINAVIR	1	-8	14
M_SOFOSBUVIR	1	-8	9
RIOCIGUAT	1	-8	7
GLIPIZIDE	1	-8	7
TRETINOIN	1	-8	5
PREDNISOLONE	1	-8	6
HYDROXYSTILBAMIDINE	1	-8	0
STREPTOMYCIN	1	-8	16
ENZALUTAMIDE	1	-8	4
NORETHINDRONE	1	-8	2
FIDAXOMICIN	1	-8	22
DAUNORUBICIN	1	-8	9
RUCAPARIB	1	-8	3
PANTOPRAZOLE	1	-8	0
DOXAZOSIN	1	-8	5
REGADENOSON	1	-8	8
INDAPAMIDE	1	-8	4
ERTUGLIFLOZIN	1	-8	10
SOLIFENACIN	1	-8	3
M_TICAGRELOR	1	-8	10
IVOSIDENIB	1	-8	7
NELFINAVIR	1	-8	12
DESOXYCORTICOSTERONE	1	-8	4
MIFEPRISTONE	1	-8	4
OXYTETRACYCLINE	1	-8	8
GRAMICIDIN	1	-8	18
TRABECTEDIN	1	-8	7
GOSERELIN	1	-8	WARNING:
ABIRATERONE	1	-8	3
DANTROLENE	1	-8	0
FOSTAMATINIB	1	-8	10
ERTAPENEM	1	-8	8
BETAMETHASONE	1	-8	5
PRALATREXATE	1	-8	12
M_FOSTAMATINIB	1	-8	7
M_DOLASETRON	1	-8	0
OCTREOTIDE	1	-8	22
AZILSARTAN	1	-8	10
DANAZOL	1	-8	1
DEXAMETHASONE	1	-8	5
FEXOFENADINE	1	-8	12
PIMECROLIMUS	1	-8	8
APREPITANT	1	-8	8
OXAZEPAM	1	-8	2
TALAZOPARIB	1	-8	2
LURASIDONE	1	-8	5
APALUTAMIDE	1	-8	4
DESMOPRESSIN	1	-8	20
AVANAFIL	1	-8	10
M_CARIPRAZINE	1	-7.9	5
STANOZOLOL	1	-7.9	1
CHOLECALCIFEROL	1	-7.9	8
PRAZIQUANTEL	1	-7.9	1
PIPERACILLIN	1	-7.9	6
CALCITRIOL	1	-7.9	9
INDOMETHACIN	1	-7.9	4
AZLOCILLIN	1	-7.9	5
BRIGATINIB	1	-7.9	8
VECURONIUM	1	-7.9	6
SN38	1	-7.9	4
CHLORTETRACYCLINE	1	-7.9	7
BAZEDOXIFENE	1	-7.9	9
MEZLOCILLIN	1	-7.9	6
DESOXYCORTICOSTERONE	1	-7.9	5
BETAMETHASONE	1	-7.9	6
TETRACYCLINE	1	-7.9	7
TRIAMCINOLONE	1	-7.9	8
BUDESONIDE	1	-7.9	6
CANDESARTAN	1	-7.9	13
ELETRIPTAN	1	-7.9	6
INGENOL	1	-7.9	7
LINAGLIPTIN	1	-7.9	6
CLOFAZIMINE	1	-7.9	4
DEMECLOCYCLINE	1	-7.9	7
M_LINACLOTIDE	1	-7.9	12
VALRUBICIN	1	-7.9	16
METHOTREXATE	1	-7.9	11
CITALOPRAM	1	-7.9	0
FOSINOPRIL	1	-7.9	15
PRASTERONE	1	-7.9	0
HALOBETASOL	1	-7.9	6
BELINOSTAT	1	-7.9	6
CEFTOLOZANE	1	-7.9	15
NORETHYNODREL	1	-7.9	1
BENAZEPRILAT	1	-7.9	8
SILODOSIN	1	-7.9	15
NORGESTREL	1	-7.9	2
DABIGATRAN	1	-7.9	10
PARAMETHASONE	1	-7.9	6
BESIFLOXACIN	1	-7.9	0
ETODOLAC	1	-7.9	0
DOCETAXEL	1	-7.9	17
BREXANOLONE	1	-7.9	2
ILOPERIDONE	1	-7.9	8
UPADACITINIB	1	-7.9	0
CYCLOTHIAZIDE	1	-7.9	3
BACITRACIN	1	-7.9	WARNING:
FINASTERIDE	1	-7.9	2
DIFLORASONE	1	-7.9	7
LEUCOVORIN	1	-7.9	11
CLEMASTINE	1	-7.8	0
CARIPRAZINE	1	-7.8	5
MEGESTROL	1	-7.8	3
DEGARELIX_c001	1	-7.8	WARNING:
MEDROXYPROGESTERONE	1	-7.8	3
COPANLISIB	1	-7.8	9
ANIDULAFUNGIN	1	-7.8	23
SPIRONOLACTONE	1	-7.8	2
PRAZIQUANTEL	1	-7.8	1
TOREMIFENE	1	-7.8	0
IBRUTINIB	1	-7.8	6
DABIGATRAN	1	-7.8	18
DAUNORUBICINOL	1	-7.8	10
BREMELANOTIDE	1	-7.8	17
GLASDEGIB	1	-7.8	3
OBETICHOLIC	1	-7.8	7
BOSENTAN	1	-7.8	12
IDELALISIB	1	-7.8	5
CANDESARTAN	1	-7.8	7
TEMAZEPAM	1	-7.8	2
MAYTANSINE	1	-7.8	10
FOSINOPRILAT	1	-7.8	10
HALOBETASOL	1	-7.8	4
METOLAZONE	1	-7.8	3
FOSAPREPITANT	1	-7.8	9
CAPREOMYCIN	1	-7.8	14
OLODATEROL	1	-7.8	9
CHLORTHALIDONE	1	-7.8	4
SULFISOXAZOLE	1	-7.8	0
FEDRATINIB	1	-7.8	11
OLSALAZINE	1	-7.8	0
CALCIPOTRIENE	1	-7.8	8
SULFASALAZINE	1	-7.8	7
DIFLUPREDNATE	1	-7.8	9
BEDAQUILINE	1	-7.8	9
DYDROGESTERONE	1	-7.8	1
PEMETREXED	1	-7.8	10
RAMIPRILAT	1	-7.8	8
CEFTAROLINE	1	-7.8	11
OLMESARTAN	1	-7.8	12
RETAPAMULIN	1	-7.8	7
DIENOGEST	1	-7.8	2
NORELGESTROMIN	1	-7.8	3
DARUNAVIR	1	-7.8	14
PRALATREXATE	1	-7.8	12
PANCURONIUM	1	-7.8	6
MICAFUNGIN	1	-7.8	28
METHACYCLINE	1	-7.8	7
ESLICARBAZEPINE	1	-7.7	2
M_CLOFARABINE	1	-7.7	10
NANDROLONE	1	-7.7	10
DIHYDROCODEINE	1	-7.7	2
M_MIDOSTAURIN	1	-7.7	6
RALOXIFENE	1	-7.7	9
MEDRYSONE	1	-7.7	2
DALFOPRISTIN	1	-7.7	8
OLOPATADINE	1	-7.7	0
HYDROCORTISONE	1	-7.7	6
DESOXYCORTICOSTERONE	1	-7.7	3
TRIAMCINOLONE	1	-7.7	6
CLOBETASOL	1	-7.7	6
FLUOROMETHOLONE	1	-7.7	3
ESTRAMUSTINE	1	-7.7	7
PERGOLIDE	1	-7.7	0
CANAGLIFLOZIN	1	-7.7	9
FLUTICASONE	1	-7.7	7
CORTISONE	1	-7.7	4
LEVONORGESTREL	1	-7.7	2
NIRAPARIB	1	-7.7	3
M_FLUOROURACIL	1	-7.7	9
TEZACAFTOR	1	-7.7	11
M_GEMCITABINE	1	-7.7	8
RESCINNAMINE	1	-7.7	11
ZIPRASIDONE	1	-7.7	4
AZITHROMYCIN	1	-7.7	12
GRANISETRON	1	-7.7	2
QUINIDINE	1	-7.7	0
M_LOSARTAN	1	-7.7	8
ROSIGLITAZONE	1	-7.7	0
HYDROCORTISONE	1	-7.7	9
MEBENDAZOLE	1	-7.7	4
CERULETIDE	1	-7.7	WARNING:
PALONOSETRON	1	-7.7	1
NETUPITANT	1	-7.7	7
TRAZODONE	1	-7.7	5
GALANTAMINE	1	-7.7	2
CRIZOTINIB	1	-7.7	6
M_DESLORATADINE	1	-7.7	1
TESTOSTERONE	1	-7.7	7
QUINAPRILAT	1	-7.7	8
M_LAMIVUDINE	1	-7.7	9
GLYCEROL	1	-7.7	20
TEMSIROLIMUS	1	-7.7	15
AFATINIB	1	-7.7	8
CORTISONE	1	-7.7	5
ROSIGLITAZONE	1	-7.7	0
DUVELISIB	1	-7.7	4
DAPAGLIFLOZIN	1	-7.7	10
NORETHINDRONE	1	-7.7	1
FOLIC	1	-7.7	10
TELAPREVIR	1	-7.7	14
FOSPHENYTOIN	1	-7.6	5
METOLAZONE	1	-7.6	3
SOFOSBUVIR	1	-7.6	12
BENZHYDROCODONE	1	-7.6	4
CHENODIOL	1	-7.6	6
BREXPIPRAZOLE	1	-7.6	7
METHYLPREDNISOLONE	1	-7.6	9
ETODOLAC	1	-7.6	0
NITISINONE	1	-7.6	4
BUTORPHANOL	1	-7.6	4
TELOTRISTAT	1	-7.6	13
PRAZOSIN	1	-7.6	5
HYDROCORTISONE	1	-7.6	8
HALOPERIDOL	1	-7.6	10
NEFAZODONE	1	-7.6	10
VITAMIN	1	-7.6	6
OXANDROLONE	1	-7.6	1
ARIPIPRAZOLE	1	-7.6	7
PIROXICAM	1	-7.6	3
TEDIZOLID	1	-7.6	6
PIOGLITAZONE	1	-7.6	7
TRIAZOLAM	1	-7.6	1
M_SACUBITRIL	1	-7.6	10
SULFINPYRAZONE	1	-7.6	6
EPIRUBICIN	1	-7.6	11
ESTRADIOL	1	-7.6	2
PREDNISONE	1	-7.6	4
M_ROFLUMILAST	1	-7.6	7
ACITRETIN	1	-7.6	6
BENDROFLUMETHIAZIDE	1	-7.6	5
CEFMENOXIME	1	-7.6	9
CANDESARTAN	1	-7.6	13
LEMBOREXANT	1	-7.6	6
DAROLUTAMIDE	1	-7.6	7
PREDNISOLONE	1	-7.6	8
LEFAMULIN	1	-7.6	9
BETAMETHASONE	1	-7.6	6
M_SELUMETINIB	1	-7.6	7
URSODIOL	1	-7.6	6
M_QUETIAPINE	1	-7.6	1
LEVOFLOXACIN	1	-7.6	2
ESZOPICLONE	1	-7.6	3
ALPRAZOLAM	1	-7.6	1
M_CEFTAROLINE	1	-7.6	10
BUDESONIDE	1	-7.6	6
NAFCILLIN	1	-7.6	5
TICAGRELOR	1	-7.6	13
ANILERIDINE	1	-7.6	8
APOMORPHINE	1	-7.6	2
DIPHENOXYLATE	1	-7.6	9
CODEINE	1	-7.6	2
CEFAMANDOLE	1	-7.6	9
MINOCYCLINE	1	-7.6	7
ELUXADOLINE	1	-7.6	12
AMLEXANOX	1	-7.6	3
METHYLTESTOSTERONE	1	-7.6	0
APREMILAST	1	-7.6	8
DROMOSTANOLONE	1	-7.6	3
OMADACYCLINE	1	-7.6	11
MIDAZOLAM	1	-7.6	1
TESTOSTERONE	1	-7.6	3
CEFTIBUTEN	1	-7.6	7
VANCOMYCIN	1	-7.6	23
LEUPROLIDE	1	-7.6	WARNING:
MOEXIPRIL	1	-7.6	12
VIOMYCIN	1	-7.6	16
PRASUGREL	1	-7.6	6
rifampdb	1	-7.6	10
DESOXIMETASONE	1	-7.6	4
SULINDAC	1	-7.5	4
LUSUTROMBOPAG	1	-7.5	13
M_CYTARABINE	1	-7.5	11
QUETIAPINE	1	-7.5	0
M_THIOGUANINE	1	-7.5	7
ABARELIX	1	-7.5	WARNING:
NALBUPHINE	1	-7.5	5
OXYPHENCYCLIMINE	1	-7.5	7
M_ALCAFTADINE	1	-7.5	1
TOPIRAMATE	1	-7.5	4
M_FLUDARABINE	1	-7.5	11
VANDETANIB	1	-7.5	6
CEFONICID	1	-7.5	11
OXYMETHOLONE	1	-7.5	2
M_GANCICLOVIR	1	-7.5	13
DOLASETRON	1	-7.5	3
METHYLERGONOVINE	1	-7.5	5
MASOPROCOL	1	-7.5	9
BOSUTINIB	1	-7.5	9
ROMIDEPSIN	1	-7.5	2
TIGECYCLINE	1	-7.5	11
BALSALAZIDE	1	-7.5	9
PIPERACETAZINE	1	-7.5	8
OSIMERTINIB	1	-7.5	10
EPROSARTAN	1	-7.5	10
SUNITINIB	1	-7.5	7
MODAFINIL	1	-7.5	0
MIRTAZAPINE	1	-7.5	0
M_ENZALUTAMIDE	1	-7.5	4
M_CLADRIBINE	1	-7.5	10
FLORTAUCIPIR	1	-7.5	1
MORPHINE	1	-7.5	2
CYCLOTHIAZIDE	1	-7.5	3
TELITHROMYCIN	1	-7.5	12
CEFAZOLIN	1	-7.5	7
TRIMETHAPHAN	1	-7.5	4
BINIMETINIB	1	-7.5	7
PHENYTOIN	1	-7.5	2
ETHYNODIOL	1	-7.5	4
FLUNISOLIDE	1	-7.5	4
BENZTHIAZIDE	1	-7.5	6
CANGRELOR	1	-7.5	18
RILPIVIRINE	1	-7.5	5
PROTRIPTYLINE	1	-7.5	4
MOEXIPRILAT	1	-7.5	11
PLERIXAFOR	1	-7.5	4
LEVALLORPHAN	1	-7.5	0
TOPOTECAN	1	-7.5	5
HYDROCORTISONE	1	-7.5	5
CLONAZEPAM	1	-7.5	2
FLUOXYMESTERONE	1	-7.5	2
NEPAFENAC	1	-7.4	0
ETHYLESTRENOL	1	-7.4	2
CARBAMAZEPINE	1	-7.4	0
PROPANTHELINE	1	-7.4	7
HYDROMORPHONE	1	-7.4	1
ARTEMETHER	1	-7.4	1
HYDROXYPROGESTERONE	1	-7.4	7
OXYCODONE	1	-7.4	2
MELOXICAM	1	-7.4	3
RIVAROXABAN	1	-7.4	5
CEFORANIDE	1	-7.4	11
FENOFIBRATE	1	-7.4	7
CEFPROZIL	1	-7.4	7
GEMIFLOXACIN	1	-7.4	6
TESTOSTERONE	1	-7.4	0
SAFINAMIDE	1	-7.4	7
CELECOXIB	1	-7.4	5
M_DAROLUTAMIDE	1	-7.4	6
RIBOFLAVIN	1	-7.4	10
PROBUCOL	1	-7.4	10
PROTOKYLOL	1	-7.4	9
BISACODYL	1	-7.4	7
BITOLTEROL	1	-7.4	11
TREPROSTINIL	1	-7.4	12
NORGESTIMATE	1	-7.4	4
ROFECOXIB	1	-7.4	3
M_ZALCITABINE	1	-7.4	9
RIMEXOLONE	1	-7.4	3
CLOBAZAM	1	-7.4	1
SILDENAFIL	1	-7.4	7
ATORVASTATIN	1	-7.4	14
NICARDIPINE	1	-7.4	11
BUTENAFINE	1	-7.4	5
M_TRAVOPROST	1	-7.4	15
CHOLIC	1	-7.4	7
TROLEANDOMYCIN	1	-7.4	12
ZOLPIDEM	1	-7.4	3
ESTRADIOL	1	-7.4	6
METHIXENE	1	-7.4	2
LEVOMEFOLATE	1	-7.4	10
CEFEPIME	1	-7.4	8
FENTANYL	1	-7.4	6
INDECAINIDE	1	-7.4	6
M_DOXERCALCIFEROL	1	-7.4	9
M_NELARABINE	1	-7.4	12
SERTACONAZOLE	1	-7.4	6
THIETHYLPERAZINE	1	-7.4	0
GENTIAN	1	-7.4	6
CEFIXIME	1	-7.4	9
ICATIBANT	1	-7.4	WARNING:
CYCLOTHIAZIDE	1	-7.4	3
IXABEPILONE	1	-7.4	4
DAROLUTAMIDE	1	-7.4	7
RAPACURONIUM	1	-7.4	9
THALIDOMIDE	1	-7.4	1
TRILOSTANE	1	-7.4	2
ORPHENADRINE	1	-7.4	0
ESTAZOLAM	1	-7.4	1
M_DIDANOSINE	1	-7.4	8
DASATINIB	1	-7.4	8
ALVIMOPAN	1	-7.4	9
EFAVIRENZ	1	-7.4	0
MACIMORELIN	1	-7.4	11
SITAGLIPTIN	1	-7.3	6
M_DIFLUPREDNATE	1	-7.3	8
PROTOKYLOL	1	-7.3	9
LORATADINE	1	-7.3	2
CARBINOXAMINE	1	-7.3	0
PYRVINIUM	1	-7.3	4
CHLOPHEDIANOL	1	-7.3	0
PRETOMANID	1	-7.3	6
CYCLOTHIAZIDE	1	-7.3	3
CISAPRIDE	1	-7.3	10
TAFAMIDIS	1	-7.3	2
DIHYDROARTEMISININ	1	-7.3	1
TRIFLUOPERAZINE	1	-7.3	5
KETOTIFEN	1	-7.3	0
FLUPREDNISOLONE	1	-7.3	5
TOFACITINIB	1	-7.3	3
NARATRIPTAN	1	-7.3	5
LESINURAD	1	-7.3	5
M_FLURAZEPAM	1	-7.3	1
CEFAMANDOLE	1	-7.3	8
EPINASTINE	1	-7.3	1
REPAGLINIDE	1	-7.3	10
OXICONAZOLE	1	-7.3	6
PAROXETINE	1	-7.3	4
AMOXICILLIN	1	-7.3	6
NANDROLONE	1	-7.3	0
SEGESTERONE	1	-7.3	3
M_GEMCITABINE	1	-7.3	10
M_CARIPRAZINE	1	-7.3	5
CARBENICILLIN	1	-7.3	5
PITAVASTATIN	1	-7.3	10
LANREOTIDE	1	-7.3	21
NEVIRAPINE	1	-7.3	1
CEFPROZIL	1	-7.3	7
SARECYCLINE	1	-7.3	9
MAPROTILINE	1	-7.3	4
CEPHRADINE	1	-7.3	5
BETAMETHASONE	1	-7.3	9
ALOGLIPTIN	1	-7.3	4
ESTRONE	1	-7.3	1
BECLOMETHASONE	1	-7.3	9
MAZINDOL	1	-7.3	2
ACARBOSE	1	-7.3	22
OFLOXACIN	1	-7.3	2
ISAVUCONAZOLE	1	-7.3	7
GEFITINIB	1	-7.3	8
PENTAGASTRIN	1	-7.3	22
AFAMELANOTIDE	1	-7.3	WARNING:
CYCLOTHIAZIDE	1	-7.3	3
AZATADINE	1	-7.3	0
ESLICARBAZEPINE	1	-7.3	1
PEMIGATINIB	1	-7.3	6
LINACLOTIDE	1	-7.3	17
ERGOCALCIFEROL	1	-7.3	6
VARDENAFIL	1	-7.3	8
NABILONE	1	-7.3	7
ROCURONIUM	1	-7.3	7
PHENPROCOUMON	1	-7.3	4
DALBAVANCIN	1	-7.3	WARNING:
LEUCOVORIN	1	-7.3	11
DESOGESTREL	1	-7.3	2
EQUILIN	1	-7.3	1
GEMIFLOXACIN	1	-7.3	6
BICALUTAMIDE	1	-7.3	7
NALMEFENE	1	-7.3	4
LABETALOL	1	-7.3	10
HYDROCORTISONE	1	-7.3	10
ENCORAFENIB	1	-7.3	10
CEPHALOGLYCIN	1	-7.3	8
ESTRAMUSTINE	1	-7.3	8
ACLIDINIUM	1	-7.3	11
LENALIDOMIDE	1	-7.3	2
THALIDOMIDE	1	-7.3	1
PODOFILOX	1	-7.3	5
DEOXYCHOLIC	1	-7.3	6
VASOPRESSIN	1	-7.3	21
GANIRELIX	1	-7.3	WARNING:
ERDAFITINIB	1	-7.2	9
PRASUGREL	1	-7.2	6
ASENAPINE	1	-7.2	0
CHLOPHEDIANOL	1	-7.2	0
CEFUROXIME	1	-7.2	12
TERAZOSIN	1	-7.2	5
ALCLOMETASONE	1	-7.2	9
HALAZEPAM	1	-7.2	3
NAFARELIN	1	-7.2	WARNING:
M_TRICLABENDAZOLE	1	-7.2	3
TESTOSTERONE	1	-7.2	11
PROTIRELIN	1	-7.2	6
PHYTONADIONE	1	-7.2	14
TRICHLORMETHIAZIDE	1	-7.2	0
MORICIZINE	1	-7.2	6
TAZAROTENE	1	-7.2	5
CABAZITAXEL	1	-7.2	17
BOCEPREVIR	1	-7.2	10
TORSEMIDE	1	-7.2	5
DRONABINOL	1	-7.2	5
M_AMODIAQUINE	1	-7.2	6
ETONOGESTREL	1	-7.2	2
MECLOFENAMATE	1	-7.2	3
CILOSTAZOL	1	-7.2	7
BACAMPICILLIN	1	-7.2	11
ALPHA-TOCOPHEROL	1	-7.2	13
ERYTHROMYCIN	1	-7.2	12
OXYPHENCYCLIMINE	1	-7.2	7
DAPIPRAZOLE	1	-7.2	4
CEFUROXIME	1	-7.2	8
LOVASTATIN	1	-7.2	8
LOXAPINE	1	-7.2	1
FROVATRIPTAN	1	-7.2	2
METHYCLOTHIAZIDE	1	-7.2	0
TRIPTORELIN	1	-7.2	WARNING:
CEPHAPIRIN	1	-7.2	8
OXCARBAZEPINE	1	-7.2	0
M_OXCARBAZEPINE	1	-7.2	1
MAZINDOL	1	-7.2	2
PIOGLITAZONE	1	-7.2	7
M_CARBAMAZEPINE	1	-7.2	0
MITOMYCIN	1	-7.2	5
METHIXENE	1	-7.2	2
M_GANCICLOVIR	1	-7.2	13
NADOLOL	1	-7.2	9
PHENYLBUTAZONE	1	-7.2	5
M_ACYCLOVIR	1	-7.2	11
ROFLUMILAST	1	-7.2	7
LOPINAVIR	1	-7.2	16
WARFARIN	1	-7.2	5
M_SILDENAFIL	1	-7.2	7
ONDANSETRON	1	-7.2	2
ACETOHEXAMIDE	1	-7.2	4
LOMEFLOXACIN	1	-7.2	3
PREDNISOLONE	1	-7.2	5
POMALIDOMIDE	1	-7.2	2
VORTIOXETINE	1	-7.2	3
PEMIROLAST	1	-7.2	1
OZENOXACIN	1	-7.2	4
LORAZEPAM	1	-7.2	2
DEXTROMETHORPHAN	1	-7.2	1
DOXYLAMINE	1	-7.2	0
NADOLOL	1	-7.2	9
AMPICILLIN	1	-7.2	5
HOMATROPINE	1	-7.2	5
DESLORATADINE	1	-7.2	0
LANSOPRAZOLE	1	-7.2	6
VALSARTAN	1	-7.2	10
QUINETHAZONE	1	-7.2	0
DOXEPIN	1	-7.2	3
MIRTAZAPINE	1	-7.2	0
BROMODIPHENHYDRAMINE	1	-7.2	0
M_PIMAVANSERIN	1	-7.2	8
ESCITALOPRAM	1	-7.2	0
ISOTRETINOIN	1	-7.2	5
TEDIZOLID	1	-7.2	5
METHANTHELINE	1	-7.1	7
HISTRELIN	1	-7.1	WARNING:
ALCAFTADINE	1	-7.1	1
CEFADROXIL	1	-7.1	6
CENOBAMATE	1	-7.1	5
ALOSETRON	1	-7.1	2
FEXOFENADINE	1	-7.1	12
MYCOPHENOLATE	1	-7.1	11
M_SELEXIPAG	1	-7.1	11
QUINAPRIL	1	-7.1	10
METHDILAZINE	1	-7.1	2
M_VALBENAZINE	1	-7.1	5
BUPRENORPHINE	1	-7.1	7
NATEGLINIDE	1	-7.1	6
LUMEFANTRINE	1	-7.1	11
CLOTRIMAZOLE	1	-7.1	4
SERTACONAZOLE	1	-7.1	6
KETOPROFEN	1	-7.1	4
CLOZAPINE	1	-7.1	1
GREPAFLOXACIN	1	-7.1	3
CYPROHEPTADINE	1	-7.1	0
PENTAZOCINE	1	-7.1	0
CASPOFUNGIN	1	-7.1	WARNING:
FORMOTEROL	1	-7.1	11
METHYLNALTREXONE	1	-7.1	4
NICLOSAMIDE	1	-7.1	4
FLUTEMETAMOL	1	-7.1	3
NAFTIFINE	1	-7.1	5
VOXELOTOR	1	-7.1	7
CLEVIDIPINE	1	-7.1	10
ACETOPHENAZINE	1	-7.1	8
DIAZEPAM	1	-7.1	1
LEFLUNOMIDE	1	-7.1	3
BIPERIDEN	1	-7.1	6
TIZOXANIDE	1	-7.1	0
BENAZEPRIL	1	-7.1	10
TERAZOSIN	1	-7.1	5
HYDROCODONE	1	-7.1	1
CHLORTHALIDONE	1	-7.1	4
ATOMOXETINE	1	-7.1	0
M_RAPACURONIUM	1	-7.1	8
SELEXIPAG	1	-7.1	12
BEPOTASTINE	1	-7.1	8
SPIRAPRIL	1	-7.1	10
NALTREXONE	1	-7.1	4
BOCEPREVIR	1	-7.1	10
HALOFANTRINE	1	-7.1	12
CEFOTETAN	1	-7.1	9
FLUOXETINE	1	-7.1	7
RUXOLITINIB	1	-7.1	4
SAXAGLIPTIN	1	-7.1	4
BACAMPICILLIN	1	-7.1	11
DIFLUNISAL	1	-7.1	3
CARPHENAZINE	1	-7.1	9
RANOLAZINE	1	-7.1	10
M_PENCICLOVIR	1	-7.1	13
REMIMAZOLAM	1	-7.1	5
ALITRETINOIN	1	-7.1	5
LYPRESSIN	1	-7.1	22
LEVOBUNOLOL	1	-7.1	7
LOMEFLOXACIN	1	-7.1	3
MEPIVACAINE	1	-7.1	0
M_SULINDAC	1	-7.1	4
M_TAZAROTENE	1	-7.1	3
ILOPROST	1	-7.1	11
M_SIMVASTATIN	1	-7	13
TRAVOPROST	1	-7	17
FLUPHENAZINE	1	-7	8
CABERGOLINE	1	-7	8
TAFENOQUINE	1	-7	11
OXYMORPHONE	1	-7	2
OMEPRAZOLE	1	-7	5
TOLCAPONE	1	-7	5
ANISINDIONE	1	-7	2
PENICILLIN	1	-7	5
ERYTHROMYCIN	1	-7	14
CYCLOTHIAZIDE	1	-7	3
FLECAINIDE	1	-7	9
METHYLPREDNISOLONE	1	-7	5
CYCLOTHIAZIDE	1	-7	3
CARBENICILLIN	1	-7	5
ENALAPRILAT	1	-7	8
RESERPINE	1	-7	10
BICALUTAMIDE	1	-7	7
M_PRASUGREL	1	-7	6
ISOPROPAMIDE	1	-7	8
RUFINAMIDE	1	-7	0
FLUOXETINE	1	-7	7
ETRAVIRINE	1	-7	5
OXYMETAZOLINE	1	-7	0
DOBUTAMINE	1	-7	10
DIETHYLSTILBESTROL	1	-7	0
TIOTROPIUM	1	-7	6
PIMAVANSERIN	1	-7	8
SACUBITRIL	1	-7	12
BENZOYL	1	-7	5
CIPROFLOXACIN	1	-7	3
LOTEPREDNOL	1	-7	8
POMALIDOMIDE	1	-7	2
PALIPERIDONE	1	-7	20
AMPRENAVIR	1	-7	14
OMACETAXINE	1	-7	13
TIROFIBAN	1	-7	14
ONDANSETRON	1	-7	2
CEPHALEXIN	1	-7	5
EPINASTINE	1	-7	1
DAPTOMYCIN	1	-7	WARNING:
FLECAINIDE	1	-7	9
M_TRICLABENDAZOLE	1	-7	3
FULVESTRANT	1	-7	17
M_ACETOHEXAMIDE	1	-7	5
NORFLOXACIN	1	-7	3
DOXYLAMINE	1	-7	0
CISATRACURIUM	1	-7	26
FLUVASTATIN	1	-7	10
TRANDOLAPRILAT	1	-7	8
KETOPROFEN	1	-7	4
CEFTIZOXIME	1	-7	6
DEZOCINE	1	-7	2
THIORIDAZINE	1	-7	4
CEFUROXIME	1	-7	12
NORTRIPTYLINE	1	-7	3
OXAZEPAM	1	-7	2
BENZTROPINE	1	-7	4
CYCLOTHIAZIDE	1	-7	3
M_DIAZEPAM	1	-7	1
URIDINE	1	-7	8
NALOXONE	1	-7	4
SPIRAPRILAT	1	-7	8
TERBINAFINE	1	-7	6
TRANDOLAPRIL	1	-7	10
QUININE	1	-7	5
TOLAZAMIDE	1	-7	3
CEFOTAXIME	1	-7	9
ANGIOTENSIN	1	-6.9	31
M_PRASUGREL	1	-6.9	6
VALBENAZINE	1	-6.9	9
NILUTAMIDE	1	-6.9	3
M_TETRABENAZINE	1	-6.9	5
CARFILZOMIB	1	-6.9	20
CROMOLYN	1	-6.9	9
ALFUZOSIN	1	-6.9	9
METHDILAZINE	1	-6.9	2
FOSAMPRENAVIR	1	-6.9	15
DIPHENHYDRAMINE	1	-6.9	0
ORPHENADRINE	1	-6.9	0
EZOGABINE	1	-6.9	7
VINBLASTINE	1	-6.9	12
LENALIDOMIDE	1	-6.9	2
ZILEUTON	1	-6.9	3
BIMATOPROST	1	-6.9	15
DIRITHROMYCIN	1	-6.9	16
CHLOROTRIANISENE	1	-6.9	6
M_PICOSULFATE	1	-6.9	5
ALPHA-TOCOPHEROL	1	-6.9	14
MEROPENEM	1	-6.9	6
SERTRALINE	1	-6.9	2
ROSUVASTATIN	1	-6.9	12
M_DOXEPIN	1	-6.9	3
FLUPHENAZINE	1	-6.9	17
OLANZAPINE	1	-6.9	1
PREDNICARBATE	1	-6.9	10
FUROSEMIDE	1	-6.9	6
WARFARIN	1	-6.9	5
M_NALIDIXIC	1	-6.9	0
MESORIDAZINE	1	-6.9	4
FENOLDOPAM	1	-6.9	4
PROPRANOLOL	1	-6.9	7
PRAZEPAM	1	-6.9	3
VORICONAZOLE	1	-6.9	6
CEFDITOREN	1	-6.9	8
SELUMETINIB	1	-6.9	7
LEVOCETIRIZINE	1	-6.9	8
TIAGABINE	1	-6.9	6
CLARITHROMYCIN	1	-6.9	12
AMODIAQUINE	1	-6.9	7
GREPAFLOXACIN	1	-6.9	3
M_TAFLUPROST	1	-6.9	13
AMDINOCILLIN	1	-6.9	3
MACITENTAN	1	-6.9	11
TRIOXSALEN	1	-6.9	0
OXAPROZIN	1	-6.9	5
LEVORPHANOL	1	-6.9	1
FLUDARABINE	1	-6.9	7
TENOFOVIR	1	-6.9	13
CETIRIZINE	1	-6.9	8
OSILODROSTAT	1	-6.8	1
DIENESTROL	1	-6.8	5
MIVACURIUM	1	-6.8	30
LINEZOLID	1	-6.8	4
TRICHLORMETHIAZIDE	1	-6.8	0
SULFOXONE	1	-6.8	10
COLCHICINE	1	-6.8	5
ALFUZOSIN	1	-6.8	9
MEFENAMIC	1	-6.8	3
AMBENONIUM	1	-6.8	15
M_PRASUGREL	1	-6.8	6
METHICILLIN	1	-6.8	5
TAMOXIFEN	1	-6.8	8
PENBUTOLOL	1	-6.8	8
FENOFIBRIC	1	-6.8	5
M_FLUOROURACIL	1	-6.8	5
MESORIDAZINE	1	-6.8	4
TEMAZEPAM	1	-6.8	2
ATAZANAVIR	1	-6.8	19
CLORAZEPATE	1	-6.8	2
METHOXSALEN	1	-6.8	1
COBICISTAT	1	-6.8	20
CANNABIDIOL	1	-6.8	8
TOLTERODINE	1	-6.8	8
QUAZEPAM	1	-6.8	3
CYCLOBENZAPRINE	1	-6.8	3
TRIMIPRAMINE	1	-6.8	4
QUINETHAZONE	1	-6.8	0
M_LOVASTATIN	1	-6.8	13
CEPHALOTHIN	1	-6.8	7
KETOROLAC	1	-6.8	3
DEXRAZOXANE	1	-6.8	3
LORACARBEF	1	-6.8	5
METHYSERGIDE	1	-6.8	5
TETRABENAZINE	1	-6.8	4
ENOXACIN	1	-6.8	3
MOLINDONE	1	-6.8	3
ELIGLUSTAT	1	-6.8	12
BROMODIPHENHYDRAMINE	1	-6.8	0
GABAPENTIN	1	-6.8	9
PENICILLIN	1	-6.8	4
AMFENAC	1	-6.8	5
AMITRIPTYLINE	1	-6.8	3
DILTIAZEM	1	-6.8	7
RABEPRAZOLE	1	-6.8	8
HALOPERIDOL	1	-6.8	16
SIMVASTATIN	1	-6.8	8
NORFLUOXETINE	1	-6.8	7
M_PRASUGREL	1	-6.8	6
M_LATANOPROST	1	-6.8	15
OXYTOCIN	1	-6.8	19
DIDANOSINE	1	-6.8	0
CEFDITOREN	1	-6.8	13
TRIAMTERENE	1	-6.8	4
TOLBUTAMIDE	1	-6.8	5
M_TAMOXIFEN	1	-6.8	8
SPECTINOMYCIN	1	-6.8	5
MICONAZOLE	1	-6.8	6
RITODRINE	1	-6.8	9
PRUCALOPRIDE	1	-6.8	7
CEFPODOXIME	1	-6.8	8
CLORAZEPATE	1	-6.8	2
FLURBIPROFEN	1	-6.8	3
CEFDINIR	1	-6.8	7
FENOPROFEN	1	-6.8	4
BUMETANIDE	1	-6.7	9
BIPERIDEN	1	-6.7	6
ECONAZOLE	1	-6.7	6
SULFABENZAMIDE	1	-6.7	4
ECONAZOLE	1	-6.7	6
TAZOBACTAM	1	-6.7	3
LODOXAMIDE	1	-6.7	4
DESIPRAMINE	1	-6.7	4
M_DOXEPIN	1	-6.7	3
TRIHEXYPHENIDYL	1	-6.7	6
NIMODIPINE	1	-6.7	10
PRAVASTATIN	1	-6.7	14
ORITAVANCIN	1	-6.7	29
HYDROCORTAMATE	1	-6.7	10
TELBIVUDINE	1	-6.7	4
ISOCARBOXAZID	1	-6.7	0
LUBIPROSTONE	1	-6.7	12
TAFENOQUINE	1	-6.7	11
FLUDARABINE	1	-6.7	6
POLYTHIAZIDE	1	-6.7	6
RIBOFLAVIN	1	-6.7	9
METHYCLOTHIAZIDE	1	-6.7	0
TAMSULOSIN	1	-6.7	12
CEFACLOR	1	-6.7	5
DOXEPIN	1	-6.7	3
CLEVIDIPINE	1	-6.7	10
FENOLDOPAM	1	-6.7	4
CARBINOXAMINE	1	-6.7	0
TICARCILLIN	1	-6.7	5
TELAVANCIN	1	-6.7	WARNING:
ETRETINATE	1	-6.7	8
CINOXACIN	1	-6.7	2
FLUPHENAZINE	1	-6.7	14
CYCLACILLIN	1	-6.7	4
CARVEDILOL	1	-6.7	11
AMINOGLUTETHIMIDE	1	-6.7	0
HEXOCYCLIUM	1	-6.7	5
MEPIVACAINE	1	-6.7	0
M_FESOTERODINE	1	-6.7	10
M_METHSUXIMIDE	1	-6.7	1
TIPIRACIL	1	-6.7	2
CETRORELIX	1	-6.7	WARNING:
AMIKACIN	1	-6.7	22
GABAPENTIN	1	-6.7	9
M_ACETOHEXAMIDE	1	-6.7	5
CEFOXITIN	1	-6.7	8
TRICLABENDAZOLE	1	-6.7	3
PHENINDIONE	1	-6.7	1
FEBUXOSTAT	1	-6.7	5
RAMIPRIL	1	-6.7	10
TRIPELENNAMINE	1	-6.7	0
BENZQUINAMIDE	1	-6.7	7
AMBRISENTAN	1	-6.7	7
BUPIVACAINE	1	-6.7	5
M_SAXAGLIPTIN	1	-6.7	5
OXYBUTYNIN	1	-6.7	11
RANOLAZINE	1	-6.7	10
PLAZOMICIN	1	-6.7	21
EFINACONAZOLE	1	-6.6	6
DIPIVEFRIN	1	-6.6	10
NORFLUOXETINE	1	-6.6	7
ANASTROZOLE	1	-6.6	4
VALDECOXIB	1	-6.6	4
ENTACAPONE	1	-6.6	7
PROPAFENONE	1	-6.6	12
HYDROXYZINE	1	-6.6	9
CEFPODOXIME	1	-6.6	14
CARPROFEN	1	-6.6	2
TRIFLUPROMAZINE	1	-6.6	5
M_MINOXIDIL	1	-6.6	5
IPRATROPIUM	1	-6.6	7
GRISEOFULVIN	1	-6.6	3
BUSPIRONE	1	-6.6	6
FENOPROFEN	1	-6.6	4
FONDAPARINUX	1	-6.6	WARNING:
TEGASEROD	1	-6.6	7
BUTOCONAZOLE	1	-6.6	7
KETOROLAC	1	-6.6	3
CARPROFEN	1	-6.6	2
ACRISORCIN	1	-6.6	1
PHENPROCOUMON	1	-6.6	4
MITOXANTRONE	1	-6.6	16
PROPIOMAZINE	1	-6.6	5
HEXACHLOROPHENE	1	-6.6	4
VINORELBINE	1	-6.6	11
CYCLOSPORINE	1	-6.6	16
SULFAPHENAZOLE	1	-6.6	5
ERLOTINIB	1	-6.6	10
SULFAMETHAZINE	1	-6.6	4
FLUMAZENIL	1	-6.6	3
DRONEDARONE	1	-6.6	18
ADENOSINE	1	-6.6	6
CLADRIBINE	1	-6.6	5
TAFLUPROST	1	-6.6	15
ABACAVIR	1	-6.6	6
DOXACURIUM	1	-6.6	29
MICONAZOLE	1	-6.6	6
RELEBACTAM	1	-6.6	5
DIPHENYLPYRALINE	1	-6.6	4
NITAZOXANIDE	1	-6.6	5
DOBUTAMINE	1	-6.6	10
NIMODIPINE	1	-6.6	10
PENTOSAN	1	-6.6	15
TENOFOVIR	1	-6.6	18
PANOBINOSTAT	1	-6.6	8
HEXOCYCLIUM	1	-6.6	5
ROPIVACAINE	1	-6.6	4
AZTREONAM	1	-6.6	9
ATROPINE	1	-6.6	6
PLECANATIDE	1	-6.6	30
ADEFOVIR	1	-6.6	16
DIPIVEFRIN	1	-6.6	10
FLURBIPROFEN	1	-6.6	3
TERIFLUNOMIDE	1	-6.6	4
THIORIDAZINE	1	-6.6	4
ALFENTANIL	1	-6.6	9
NEOMYCIN	1	-6.6	22
BENZYL	1	-6.6	4
GLYCOPYRROLATE	1	-6.6	6
BETAMETHASONE	1	-6.5	9
CAPSAICIN	1	-6.5	10
RITONAVIR	1	-6.5	19
PROMETHAZINE	1	-6.5	3
DULOXETINE	1	-6.5	6
FLORBETAPIR	1	-6.5	12
TRIFLURIDINE	1	-6.5	5
TRIPROLIDINE	1	-6.5	4
CHLORDIAZEPOXIDE	1	-6.5	2
CYCLIZINE	1	-6.5	3
METAXALONE	1	-6.5	3
VIDARABINE	1	-6.5	6
TRICLOSAN	1	-6.5	3
METHSCOPOLAMINE	1	-6.5	6
DORIPENEM	1	-6.5	9
SULCONAZOLE	1	-6.5	6
DEMECARIUM	1	-6.5	17
HYDROCHLOROTHIAZIDE	1	-6.5	2
CAPECITABINE	1	-6.5	9
NELARABINE	1	-6.5	7
M_METHSUXIMIDE	1	-6.5	1
PHENTOLAMINE	1	-6.5	5
PROPRANOLOL	1	-6.5	7
GLYCOPYRRONIUM	1	-6.5	6
SINCALIDE	1	-6.5	WARNING:
TRIHEXYPHENIDYL	1	-6.5	6
M_FLUTAMIDE	1	-6.5	5
CALICHEAMICIN	1	-6.5	29
URIDINE	1	-6.5	5
ANTAZOLINE	1	-6.5	5
LACTULOSE	1	-6.5	13
CYCRIMINE	1	-6.5	6
CLOMIPRAMINE	1	-6.5	4
AMINOGLUTETHIMIDE	1	-6.5	0
CYCLOPENTOLATE	1	-6.5	8
BENZQUINAMIDE	1	-6.5	7
OXAMNIQUINE	1	-6.5	6
GLYCOPYRRONIUM	1	-6.5	6
BRINZOLAMIDE	1	-6.5	8
ARBUTAMINE	1	-6.5	12
M_CLOPIDOGREL	1	-6.5	6
PERINDOPRIL	1	-6.5	9
ATROPINE	1	-6.5	6
ANAGRELIDE	1	-6.5	0
LEVOBUPIVACAINE	1	-6.5	5
ENALAPRIL	1	-6.5	10
MEPHENYTOIN	1	-6.5	2
ARIPIPRAZOLE	1	-6.5	20
M_CANNABIDIOL	1	-6.5	10
PROCYCLIDINE	1	-6.5	6
ROTIGOTINE	1	-6.5	7
ETOMIDATE	1	-6.4	0
PROMETHAZINE	1	-6.4	3
METIPRANOLOL	1	-6.4	9
CHLOROTHIAZIDE	1	-6.4	2
CEFPODOXIME	1	-6.4	14
PAROMOMYCIN	1	-6.4	22
DICLOFENAC	1	-6.4	4
MIRABEGRON	1	-6.4	11
NAPROXEN	1	-6.4	3
OXYBUTYNIN	1	-6.4	11
BLEOMYCIN	1	-6.4	WARNING:
IMIQUIMOD	1	-6.4	3
SULFAMERAZINE	1	-6.4	4
HEXYLCAINE	1	-6.4	6
LABETALOL	1	-6.4	10
ETHOPROPAZINE	1	-6.4	5
AMIODARONE	1	-6.4	11
DYCLONINE	1	-6.4	8
LEUCOMETHYLENE	1	-6.4	2
METIPRANOLOL	1	-6.4	9
VORINOSTAT	1	-6.4	9
HOMATROPINE	1	-6.4	5
CHLORHEXIDINE	1	-6.4	9
M_CLOPIDOGREL	1	-6.4	6
AZATHIOPRINE	1	-6.4	3
LABETALOL	1	-6.4	10
TRIMEPRAZINE	1	-6.4	4
IPRATROPIUM	1	-6.4	7
LULICONAZOLE	1	-6.4	3
CYCRIMINE	1	-6.4	6
SUPROFEN	1	-6.4	4
METHYLENE	1	-6.4	2
CICLOPIROX	1	-6.4	2
SUPROFEN	1	-6.4	4
LETROZOLE	1	-6.4	3
BROMFENAC	1	-6.4	5
ISTRADEFYLLINE	1	-6.4	6
ALISKIREN	1	-6.4	21
DIBUCAINE	1	-6.4	10
BENZQUINAMIDE	1	-6.4	7
COCAINE	1	-6.4	5
ZANAMIVIR	1	-6.4	9
VINCRISTINE	1	-6.4	13
DICHLORPHENAMIDE	1	-6.4	4
CEDAZURIDINE	1	-6.4	5
HYDRALAZINE	1	-6.4	2
M_CLOMIPRAMINE	1	-6.3	4
TIOCONAZOLE	1	-6.3	6
MOLINDONE	1	-6.3	3
OXYPHENONIUM	1	-6.3	10
RILUZOLE	1	-6.3	0
CLOFARABINE	1	-6.3	5
ZIDOVUDINE	1	-6.3	4
GLYCOPYRRONIUM	1	-6.3	6
TACRINE	1	-6.3	1
ETHOPROPAZINE	1	-6.3	5
MENADIOL	1	-6.3	2
GUANADREL	1	-6.3	2
ENTECAVIR	1	-6.3	5
PERINDOPRILAT	1	-6.3	7
LIOTHYRONINE	1	-6.3	7
SULFISOXAZOLE	1	-6.3	4
LAMOTRIGINE	1	-6.3	3
AMLODIPINE	1	-6.3	11
DAPSONE	1	-6.3	4
PERPHENAZINE	1	-6.3	7
RAMELTEON	1	-6.3	4
DIPHEMANIL	1	-6.3	2
KANAMYCIN	1	-6.3	17
NABUMETONE	1	-6.3	4
PALIPERIDONE	1	-6.3	20
HALOFANTRINE	1	-6.3	12
VARENICLINE	1	-6.3	0
BENZNIDAZOLE	1	-6.3	5
M_TRAMADOL	1	-6.3	5
PHENYL	1	-6.3	5
M_MISOPROSTOL	1	-6.3	15
CHLORPROTHIXENE	1	-6.3	3
CLINDAMYCIN	1	-6.3	11
GEMCITABINE	1	-6.3	5
ERYTHROMYCIN	1	-6.3	18
TOBRAMYCIN	1	-6.3	16
DICYCLOMINE	1	-6.3	8
TRIMETHOBENZAMIDE	1	-6.3	10
GEMFIBROZIL	1	-6.3	6
SCOPOLAMINE	1	-6.3	6
M_TETRABENAZINE	1	-6.3	5
HYDROXYZINE	1	-6.3	9
M_CIDOFOVIR	1	-6.3	10
SUMATRIPTAN	1	-6.3	6
TETRAHYDROZOLINE	1	-6.3	1
IMIPRAMINE	1	-6.3	4
CHLORPROMAZINE	1	-6.2	4
TASIMELTEON	1	-6.2	4
DIACETOLOL	1	-6.2	9
TENAPANOR	1	-6.2	29
BISOPROLOL	1	-6.2	13
DINOPROST	1	-6.2	15
EPOPROSTENOL	1	-6.2	12
AVIBACTAM	1	-6.2	4
DEXTROTHYROXINE	1	-6.2	7
BEMPEDOIC	1	-6.2	15
FLOXURIDINE	1	-6.2	4
DORZOLAMIDE	1	-6.2	4
TIOCONAZOLE	1	-6.2	6
ACEBUTOLOL	1	-6.2	11
NISOLDIPINE	1	-6.2	8
FELBAMATE	1	-6.2	7
TROPICAMIDE	1	-6.2	7
GENTAMICIN	1	-6.2	13
MINOXIDIL	1	-6.2	3
FLUCONAZOLE	1	-6.2	6
CHLORMEZANONE	1	-6.2	1
PEMOLINE	1	-6.2	2
VALGANCICLOVIR	1	-6.2	12
PENTOSTATIN	1	-6.2	5
TENOFOVIR	1	-6.2	6
M_TICLOPIDINE	1	-6.2	4
NISOLDIPINE	1	-6.2	8
METHADONE	1	-6.2	7
FLUTAMIDE	1	-6.2	4
RIMANTADINE	1	-6.2	2
NALIDIXIC	1	-6.2	2
PROPIOMAZINE	1	-6.2	5
PROCHLORPERAZINE	1	-6.2	4
TRAMADOL	1	-6.2	5
ZILEUTON	1	-6.2	3
CHLOROQUINE	1	-6.2	8
CHLORPROPAMIDE	1	-6.2	4
EMEDASTINE	1	-6.2	5
AMISULPRIDE	1	-6.2	8
AZACITIDINE	1	-6.2	6
CLOPIDOGREL	1	-6.2	4
TOLMETIN	1	-6.2	4
OXYPHENONIUM	1	-6.2	10
TRIMEPRAZINE	1	-6.2	4
BENDAMUSTINE	1	-6.2	9
METAXALONE	1	-6.2	3
TETRAHYDROZOLINE	1	-6.2	1
BUTOCONAZOLE	1	-6.2	7
REMIFENTANIL	1	-6.2	9
SULFAMETER	1	-6.2	5
SULFADOXINE	1	-6.2	6
IVABRADINE	1	-6.2	10
HYDROCORTISONE	1	-6.2	9
SULFAMETHIZOLE	1	-6.2	4
DISOPYRAMIDE	1	-6.2	8
THIAMINE	1	-6.2	6
SULCONAZOLE	1	-6.2	6
NAPHAZOLINE	1	-6.2	2
ETHACRYNATE	1	-6.2	6
METYRAPONE	1	-6.2	3
MYCOPHENOLIC	1	-6.2	7
NITROFURANTOIN	1	-6.2	3
SULFAPYRIDINE	1	-6.2	4
ACEBUTOLOL	1	-6.1	11
BEPRIDIL	1	-6.1	10
SALMETEROL	1	-6.1	19
DINOPROSTONE	1	-6.1	14
DIPHENIDOL	1	-6.1	7
M_TICLOPIDINE	1	-6.1	4
STIRIPENTOL	1	-6.1	4
LATANOPROST	1	-6.1	17
GUANADREL	1	-6.1	2
HYDROXYCHLOROQUINE	1	-6.1	10
PENTAMIDINE	1	-6.1	12
M_FINGOLIMOD	1	-6.1	16
METHADONE	1	-6.1	7
PYRIMETHAMINE	1	-6.1	4
CYTARABINE	1	-6.1	6
STIRIPENTOL	1	-6.1	4
CLINDAMYCIN	1	-6.1	10
FOSPROPOFOL	1	-6.1	6
LEVOTHYROXINE	1	-6.1	7
SULFAMETHOXAZOLE	1	-6.1	4
CARTEOLOL	1	-6.1	7
MONOBENZONE	1	-6.1	4
CERIVASTATIN	1	-6.1	13
M_NABUMETONE	1	-6.1	3
PEMOLINE	1	-6.1	2
VERAPAMIL	1	-6.1	13
AMISULPRIDE	1	-6.1	8
TRIMIPRAMINE	1	-6.1	4
UNOPROSTONE	1	-6.1	17
DYPHYLLINE	1	-6.1	5
DEFEROXAMINE	1	-6.1	27
AMILORIDE	1	-6.1	3
FLORBETABEN	1	-6.1	12
PHENOXYBENZAMINE	1	-6.1	8
RIBAVIRIN	1	-6.1	6
PROMAZINE	1	-6.1	4
POLYTHIAZIDE	1	-6.1	6
CHLORAMPHENICOL	1	-6.1	8
PENTOXIFYLLINE	1	-6.1	5
SULFADIAZINE	1	-6.1	4
CARBOPROST	1	-6.1	15
SARALASIN	1	-6.1	26
CEFOTIAM	1	-6.1	11
VERAPAMIL	1	-6.1	13
TRIDIHEXETHYL	1	-6.1	9
MEPHENYTOIN	1	-6.1	2
ETHOXZOLAMIDE	1	-6.1	4
CYCLOPENTOLATE	1	-6.1	8
PROPAFENONE	1	-6.1	12
DYPHYLLINE	1	-6.1	5
PHENOXYBENZAMINE	1	-6.1	8
RIZATRIPTAN	1	-6.1	5
LEVOPROPOXYPHENE	1	-6.1	9
M_ALBENDAZOLE	1	-6.1	5
PINDOLOL	1	-6.1	7
OXAMNIQUINE	1	-6.1	6
METHAZOLAMIDE	1	-6	3
ACYCLOVIR	1	-6	6
SAPROPTERIN	1	-6	5
DIACETOLOL	1	-6	9
METHSUXIMIDE	1	-6	1
VENLAFAXINE	1	-6	6
CHLOROQUINE	1	-6	8
M_MISOPROSTOL	1	-6	15
METOPROLOL	1	-6	10
OCTINOXATE	1	-6	10
NALOXEGOL	1	-6	26
STREPTOZOCIN	1	-6	7
TRIDIHEXETHYL	1	-6	9
LEVOBETAXOLOL	1	-6	12
NETILMICIN	1	-6	14
RASAGILINE	1	-6	0
METHOHEXITAL	1	-6	5
BENZPHETAMINE	1	-6	5
M_PENCICLOVIR	1	-6	13

## Sheet: Drugs-lib
Compound	Model ID	Energy	nRot
Mk3207_ZINC000103760981	1	-10.7	4		Drugs with Energy -9 and above are highlighted in Blue
R428_ZINC000051951668	1	-10.7	5
Mk3207_ZINC000043203371	1	-10.2	4
Bolazine_ZINC000008214506	1	-10.2	3
Efipladib_ZINC000085536943	1	-10.2	14
Cortisuzol_ZINC000004215464	1	-10.2	9
Dirlotapide_ZINC000003988502	1	-10.1	10
Ditercalinium_ZINC000004215707	1	-10.1	9
Mk3207_ZINC000103760984	1	-10	4
Dihydroergocristine_ZINC000003995616	1	-10	6
Zoliflodacin_ZINC000145806066	1	-10	1
Tg100-801_ZINC000029136020	1	-10	10
Zosuquidar_ZINC000100029945	1	-9.9	7
Orvepitant_ZINC000056898864	1	-9.9	6
Dihydroergocristine_ZINC000003947496	1	-9.9	6
Capmatinib_ZINC000043195321	1	-9.9	4
Proscillaridin_ZINC000257355132	1	-9.9	7
Ecopladib_ZINC000085536974	1	-9.8	14
Pamaqueside_ZINC000257972190	1	-9.8	13
Giripladib_ZINC000085537113	1	-9.8	15
Dihydroergotamine_ZINC000003978005	1	-9.7	5
Lifitegrast_ZINC000084668739	1	-9.7	7
Flezelastine_ZINC000003785445	1	-9.7	6
R428_ZINC000051951669	1	-9.7	5
Netupitant_ZINC000011681563	1	-9.6	7
Gedatolisib_ZINC000049757175	1	-9.6	7
Amg-900_ZINC000043208325	1	-9.6	7
Dihydroergocristine_ZINC000003947495	1	-9.6	6
Nilotinib_ZINC000006716957	1	-9.6	7
Mk-0893_ZINC000095574316	1	-9.6	9
Metergotamine_ZINC000072266819	1	-9.5	5
Merestinib_ZINC000095926668	1	-9.5	6
Venetoclax_ZINC000150338755	1	-9.5	13
Casopitant_ZINC000042856596	1	-9.5	6
Flumatinib_ZINC000068244727	1	-9.5	8
Mosapramine_ZINC000003873789	1	-9.5	4
Telcagepant_ZINC000028827350	1	-9.5	5
Proscillaridin_ZINC000306121902	1	-9.5	7
Tegobuvir_ZINC000100057121	1	-9.4	6
Novobiocin_ZINC000076945632	1	-9.4	11
Alisertib_ZINC000040939534	1	-9.4	6
Samatasvir_ZINC000150588806	1	-9.4	13
Irinotecan_ZINC000001612996	1	-9.4	6
Proscillaridin_ZINC000118917543	1	-9.4	7
Ubrogepant_ZINC000095598454	1	-9.4	5
Etoposide_ZINC000003925948	1	-9.4	8
Abamectin-component-b1a_ZINC000575231316	1	-9.4	11
Velpatasvir_ZINC000203686879	1	-9.3	13
Piperaquine_ZINC000026251015	1	-9.3	6
Lomitapide_ZINC000027990463	1	-9.3	12
Dihydroergocristine_ZINC000003947494	1	-9.3	6
Proscillaridin_ZINC000118915484	1	-9.3	7
Diaplasinin_ZINC000001554077	1	-9.3	10
Exatecan_ZINC000003800855	1	-9.3	3
Ar-12_ZINC000003960083	1	-9.3	6
Niceverine_ZINC000001481885	1	-9.3	10
Lixivaptan_ZINC000000600399	1	-9.3	3
Dihydroergocristine_ZINC000003947497	1	-9.3	6
Paliroden_ZINC000035826853	1	-9.2	6
Elinogrel_ZINC000043153259	1	-9.2	5
Cep-5214_ZINC000001551940	1	-9.2	7
Xl-019_ZINC000095930152	1	-9.2	6
alpha_Ergocryptine_ZINC000014952151	1	-9.2	6
Bagrosin_ZINC000026663179	1	-9.2	1
Fosaprepitant_ZINC000003939013	1	-9.2	9
Altapizone_ZINC000006096074	1	-9.2	6
Siramesine_ZINC000001533883	1	-9.2	6
Upidosin_ZINC000003796141	1	-9.2	8
Linsitinib_ZINC000100071817	1	-9.2	5
Seganserin_ZINC000000538333	1	-9.2	5
Diflomotecan_ZINC000001489193	1	-9.2	2
Mosapramine_ZINC000000597691	1	-9.2	4
Etoposide-phosphate_ZINC000072186775	1	-9.2	9
Aminoquinuride_ZINC000022910880	1	-9.2	4
Proscillaridin_ZINC000257488918	1	-9.2	7
Cep-7055_ZINC000003955614	1	-9.2	10
Erismodegib_ZINC000068202099	1	-9.2	6
Dihydroergocristine_ZINC000095862766	1	-9.2	6
Lonafarnib_ZINC000003950115	1	-9.2	3
Xaliproden_ZINC000000577115	1	-9.2	5
Rebastinib_ZINC000063933734	1	-9.1	7
Belaperidone_ZINC000003822014	1	-9.1	4
Elbasvir_ZINC000150588351	1	-9.1	13
Bms-833923_ZINC000096170449	1	-9.1	7
Cinperene_ZINC000002018996	1	-9.1	5
Tradipitant_ZINC000043194077	1	-9.1	8
Ropitoin_ZINC000011682492	1	-9.1	8
Dovitinib_ZINC000003816310	1	-9.1	3
Proscillaridin_ZINC000257488919	1	-9.1	7
Lumacaftor_ZINC000064033452	1	-9.1	5
Fluazuron_ZINC000002570819	1	-9.1	5
Etoposide-phosphate_ZINC000072186777	1	-9.1	9
Derquantel_ZINC000056898856	1	-9.1	1
Vidupiprant_ZINC000043206238	1	-9.1	10
Astemizole_ZINC000000601274	1	-9	8
Zaldaride_ZINC000002016009	1	-9	3
Mln-8054_ZINC000018825334	1	-9	4
Olaparib_ZINC000040430143	1	-9	4
Proscillaridin_ZINC000118915483	1	-9	7
Grazoprevir_ZINC000095551509	1	-9	8
Proscillaridin_ZINC000257488917	1	-9	7
Hesperidin_ZINC000008214774	1	-9	15
Bisoctrizole_ZINC000011677911	1	-9	12
Efatutazone_ZINC000033975065	1	-9	8
Dagrocorat_ZINC000103297733	1	-9	6
Golvatinib_ZINC000043195317	1	-9	8
Chir-265_ZINC000018710085	1	-9	7
Ledipasvir_ZINC000150338819	1	-9	12
Fenoverine_ZINC000019899628	1	-9	4
Ravidasvir_ZINC000150607150	1	-9	12
Bamirastine_ZINC000003927238	1	-9	11
Midostaurin_ZINC000100013130	1	-9	5
Nabazenil_ZINC000040163159	1	-9	12
Etoposide_ZINC000003830818	1	-9	8
Azd-7624_ZINC000002105296	1	-9	5
alpha_Ergocryptine_ZINC000059796556	1	-9	6
Proscillaridin_ZINC000257488916	1	-9	7
Abamectin-component-b1a_ZINC000242649032	1	-9	11
Tipifarnib_ZINC000028473960	1	-9	5
Abamectin-component-b1a_ZINC000252694903	1	-9	11
Mavatrep_ZINC000043175494	1	-9	6
Adomeglivant_ZINC000117040414	1	-8.9	12
Palomid-529_ZINC000043195312	1	-8.9	7
Paliperidone_ZINC000004214700	1	-8.9	5
Epicriptine_ZINC000004215812	1	-8.9	6
Mergocriptine_ZINC000072266905	1	-8.9	6
Ag-13958_ZINC000095909141	1	-8.9	6
Hesperidin_ZINC000100204061	1	-8.9	15
Palomid-529_ZINC000043195311	1	-8.9	7
Crenolanib_ZINC000003820043	1	-8.9	6
Tivantinib_ZINC000100016063	1	-8.9	2
Fananserin_ZINC000000597400	1	-8.9	5
Proscillaridin_ZINC000056897526	1	-8.9	7
Proscillaridin_ZINC000306121903	1	-8.9	7
Metrenperone_ZINC000000537997	1	-8.9	5
Aleplasinin_ZINC000013580622	1	-8.9	6
Azilsartan-medoxomil_ZINC000014210642	1	-8.9	10
Abamectin-component-b1a_ZINC000306147035	1	-8.9	11
Taclamine_ZINC000011616858	1	-8.9	0
Tarazepide_ZINC000002015955	1	-8.9	3
Zopolrestat_ZINC000000538557	1	-8.9	5
Velpatasvir_ZINC000504665931	1	-8.9	13
Bifeprunox_ZINC000052971454	1	-8.9	4
Velpatasvir_ZINC000504665932	1	-8.9	13
Bencianol_ZINC000004214953	1	-8.9	6
Mk3207_ZINC000103760978	1	-8.9	4
Entrectinib_ZINC000043204146	1	-8.9	7
Afacifenacin_ZINC000001554383	1	-8.9	6
Lenvatinib_ZINC000003816292	1	-8.9	6
Telmisartan_ZINC000001530886	1	-8.9	7
Rimegepant_ZINC000068267814	1	-8.9	5
Pranazepide_ZINC000003798924	1	-8.9	3
Tak-593_ZINC000095579919	1	-8.9	6
Bepafant_ZINC000013531919	1	-8.9	2
Gsk163090_ZINC000034451922	1	-8.8	5
Bafetinib_ZINC000022940637	1	-8.8	9
alpha_Ergocryptine_ZINC000059796557	1	-8.8	6
Tasosartan_ZINC000013444037	1	-8.8	4
Pralnacasan_ZINC000003994903	1	-8.8	6
Bromocriptine_ZINC000053683151	1	-8.8	6
Sitogluside_ZINC000253558544	1	-8.8	13
Ergotamine_ZINC000052955754	1	-8.8	5
Fluralaner_ZINC000095598448	1	-8.8	8
Ast-487_ZINC000023247639	1	-8.8	9
Flezelastine_ZINC000001534968	1	-8.8	6
Tolafentrine_ZINC000001493454	1	-8.8	6
alpha_Ergocryptine_ZINC000575417835	1	-8.8	6
Vx-745_ZINC000013493055	1	-8.8	3
Tulopafant_ZINC000002016001	1	-8.8	5
Disogluside_ZINC000008214547	1	-8.8	7
Isometamidium_ZINC000004216649	1	-8.8	9
Montelukast_ZINC000003831151	1	-8.8	13
Tadalafil_ZINC000000538404	1	-8.8	1
Foretinib_ZINC000043204048	1	-8.8	12
Teniposide_ZINC000077313306	1	-8.8	9
Feloprentan_ZINC000001488192	1	-8.8	12
Losulazine_ZINC000004216779	1	-8.8	6
Azd1386_ZINC000139948444	1	-8.8	3
Canagliflozin_ZINC000043207238	1	-8.8	9
alpha_Ergocryptine_ZINC000105284878	1	-8.8	6
Ocaperidone_ZINC000000538119	1	-8.8	4
Setileuton_ZINC000036487556	1	-8.8	8
Tobuterol_ZINC000004214489	1	-8.8	11
Deserpidine_ZINC000257400370	1	-8.8	9
Gsk-1070916_ZINC000043170519	1	-8.8	7
beta_Ergocryptine_ZINC000100071818	1	-8.8	6
Abamectin-component-b1a_ZINC000257373234	1	-8.8	11
Vs-5584_ZINC000049090010	1	-8.8	2
Sanguinarium_ZINC000000000706	1	-8.8	0
Etoposide_ZINC000100023533	1	-8.8	8
Amg-517_ZINC000014974132	1	-8.8	5
Ibodutant_ZINC000028711707	1	-8.8	11
Maraviroc_ZINC000100003902	1	-8.8	8
Regorafenib_ZINC000006745272	1	-8.8	6
Uk432097_ZINC000150664074	1	-8.8	16
Proscillaridin_ZINC000008143879	1	-8.8	7
Flupentixol_ZINC000028643021	1	-8.8	7
Diosmin_ZINC000004098512	1	-8.8	15
Omipalisib_ZINC000043208634	1	-8.8	6
Sitogluside_ZINC000253476255	1	-8.8	13
Liafensine_ZINC000095598450	1	-8.8	3
Cadazolid_ZINC000043195938	1	-8.8	10
Hydroxyestrone_diacetate_ZINC000079199213	1	-8.7	4
Hesperidin_ZINC000103938990	1	-8.7	15
Imatinib_ZINC000019632618	1	-8.7	7
Zaldaride_ZINC000013813280	1	-8.7	3
Netoglitazone_ZINC000003633833	1	-8.7	5
Raloxifene_ZINC000000538275	1	-8.7	9
Temafloxacin_ZINC000009133461	1	-8.7	3
Dolutegravir_ZINC000058581064	1	-8.7	4
Burapitant_ZINC000003990019	1	-8.7	10
Vorapaxar_ZINC000003925861	1	-8.7	6
Tomeglovir_ZINC000003923823	1	-8.7	8
Spirofylline_ZINC000084758966	1	-8.7	5
Flumeridone_ZINC000000537741	1	-8.7	5
Ag-13958_ZINC000034037183	1	-8.7	6
Tecarfarin_ZINC000013985547	1	-8.7	7
Sitogluside_ZINC000049888788	1	-8.7	13
Elagolix_ZINC000049888891	1	-8.7	13
Int131_ZINC000006485945	1	-8.7	5
Biriperone_ZINC000019366609	1	-8.7	5
Glisindamide_ZINC000000537799	1	-8.7	6
Teniposide_ZINC000253928518	1	-8.7	9
Cebranopadol_ZINC000003950145	1	-8.7	2
Ketanserin_ZINC000000537877	1	-8.7	5
Hesperidin_ZINC000100204053	1	-8.7	15
Cep-11981_ZINC000036411318	1	-8.7	4
Ritanserin_ZINC000000538314	1	-8.7	5
Taladegib_ZINC000068247898	1	-8.7	5
Mk-0533_ZINC000049878561	1	-8.7	10
Levophenacylmorphan_ZINC000004216728	1	-8.7	4
Izonsteride_ZINC000001544066	1	-8.7	3
Fiduxosin_ZINC000029747110	1	-8.7	7
Tak-901_ZINC000035310420	1	-8.7	5
Linarotene_ZINC000003927341	1	-8.7	4
Picloxydine_ZINC000030691566	1	-8.7	2
Proscillaridin_ZINC000306121901	1	-8.7	7
Ripisartan_ZINC000000538309	1	-8.7	6
Rg-547_ZINC000013983251	1	-8.7	7
Hesperidin_ZINC000248139800	1	-8.7	15
Bepafant_ZINC000002016003	1	-8.7	2
Teniposide_ZINC000028226562	1	-8.7	9
Azd1386_ZINC000139948300	1	-8.7	3
Talniflumate_ZINC000000601275	1	-8.7	6
Amg-208_ZINC000034285235	1	-8.6	5
Sitogluside_ZINC000253609314	1	-8.6	13
Letaxaban_ZINC000013986542	1	-8.6	6
Hydroxyestrone_diacetate_ZINC000139021488	1	-8.6	4
Linifanib_ZINC000006718813	1	-8.6	4
Velpatasvir_ZINC000220902773	1	-8.6	13
Abemaciclib_ZINC000072318121	1	-8.6	7
Tesevatinib_ZINC000114456300	1	-8.6	6
Abamectin-component-b1a_ZINC000242649028	1	-8.6	11
Heliomycin_ZINC000100150837	1	-8.6	3
Tropesin_ZINC000000638627	1	-8.6	9
Apixaban_ZINC000011677837	1	-8.6	5
Toquizine_ZINC000002029587	1	-8.6	2
Ac-480_ZINC000072190221	1	-8.6	8
Etoposide_ZINC000004245621	1	-8.6	8
Azelastine_ZINC000000601229	1	-8.6	3
Mizolastine_ZINC000013831810	1	-8.6	5
Tadalafil_ZINC000008204642	1	-8.6	1
Minalrestat_ZINC000000597385	1	-8.6	2
Ag-24322_ZINC000200158122	1	-8.6	5
Ivarimod_ZINC000004216671	1	-8.6	5
Zolasartan_ZINC000001552379	1	-8.6	8
Sulfamazone_ZINC000005502399	1	-8.6	9
Elopiprazole_ZINC000053098495	1	-8.6	4
Risperidone_ZINC000000538312	1	-8.6	4
Tak-960_ZINC000043203898	1	-8.6	6
Adapalene_ZINC000003784182	1	-8.6	4
Dihydroergocryptine_ZINC000003929793	1	-8.6	6
Sorafenib_ZINC000001493878	1	-8.6	6
Conivaptan_ZINC000012503187	1	-8.6	4
Teniposide_ZINC000003831506	1	-8.6	9
Funapide_ZINC000113473394	1	-8.6	3
Lintitript_ZINC000000537914	1	-8.6	5
Teniposide_ZINC000003831508	1	-8.6	9
Penfluridol_ZINC000004217252	1	-8.6	9
Trifluperidol_ZINC000000538505	1	-8.6	8
Tameridone_ZINC000000538412	1	-8.6	4
Buclizine_ZINC000019364226	1	-8.6	6
baicalin_ZINC000003943903	1	-8.6	9
Etoposide_ZINC000011615744	1	-8.6	8
Argatroban_ZINC000003807172	1	-8.6	9
Milenperone_ZINC000000538006	1	-8.6	6
Etoposide-phosphate_ZINC000618072474	1	-8.6	9
Lapatinib_ZINC000001550477	1	-8.6	11
Mofarotene_ZINC000027558006	1	-8.6	6
Proscillaridin_ZINC000257355131	1	-8.6	7
Camicinal_ZINC000034850365	1	-8.6	6
Ly-2584702_ZINC000043204100	1	-8.6	4
Sulindac-sulfone_ZINC000013531944	1	-8.6	4
Teniposide_ZINC000253928517	1	-8.6	9
Sitogluside_ZINC000253609312	1	-8.6	13
Talmetacin_ZINC000000608088	1	-8.6	6
Gw590735_ZINC000016052349	1	-8.6	8
Israpafant_ZINC000001533241	1	-8.6	6
Sonepiprazole_ZINC000003812548	1	-8.6	6
beta_Ergocryptine_ZINC000059213491	1	-8.6	6
Clopimozide_ZINC000004215428	1	-8.6	7
Stilbazium_ZINC000004217469	1	-8.6	7
Talmetacin_ZINC000001846459	1	-8.6	6
Etoposide_ZINC000103553205	1	-8.6	8
Dabrafenib_ZINC000068153186	1	-8.6	7
Xl-019_ZINC000095560529	1	-8.6	6
Sitogluside_ZINC000253534733	1	-8.6	13
Proscillaridin_ZINC000118917544	1	-8.6	7
Pratosartan_ZINC000003786304	1	-8.6	6
Bexarotene_ZINC000001539579	1	-8.6	3
Posaconazole_ZINC000011616816	1	-8.6	13
Milciclib_ZINC000053119602	1	-8.6	4
Alatrofloxacin_ZINC000100067477	1	-8.6	8
alpha_Ergocryptine_ZINC000222341315	1	-8.6	6
Nebivolol_ZINC000011681534	1	-8.6	8
Gimatecan_ZINC000003993519	1	-8.6	5
Velpatasvir_ZINC000504665933	1	-8.6	13
Teniposide_ZINC000067957213	1	-8.6	9
Teniposide_ZINC000003831507	1	-8.6	9
Radotinib_ZINC000059749972	1	-8.6	7
Doramapimod_ZINC000024044436	1	-8.6	8
Itraconazole_ZINC000028007119	1	-8.6	11
Darglitazone_ZINC000001492464	1	-8.5	7
Viroxime_ZINC000100088129	1	-8.5	5
Troglitazone_ZINC000000968278	1	-8.5	6
Azipramine_ZINC000001481979	1	-8.5	5
Enasidenib_ZINC000222731806	1	-8.5	9
Tobuterol_ZINC000031495045	1	-8.5	11
Tiplasinin_ZINC000003938676	1	-8.5	7
Quizartinib_ZINC000043204002	1	-8.5	8
Clocapramine_ZINC000000608266	1	-8.5	6
Palbociclib_ZINC000003938686	1	-8.5	5
Hesperidin_ZINC000252008997	1	-8.5	15
Hesperidin_ZINC000008382287	1	-8.5	15
Etoposide-phosphate_ZINC000306146645	1	-8.5	9
Eletriptan_ZINC000003823475	1	-8.5	6
Cep-32496_ZINC000043207440	1	-8.5	8
Bidimazium_ZINC000004215011	1	-8.5	5
Etoposide-phosphate_ZINC000575418371	1	-8.5	9
Lopinavir_ZINC000097975231	1	-8.5	16
Uk432097_ZINC000095539256	1	-8.5	16
Radiprodil_ZINC000028363953	1	-8.5	5
Abamectin-component-b1a_ZINC000306147034	1	-8.5	11
Abamectin-component-b1a_ZINC000245224134	1	-8.5	11
Minalrestat_ZINC000001492564	1	-8.5	2
Hesperidin_ZINC000253499897	1	-8.5	15
Tesevatinib_ZINC000038912363	1	-8.5	6
Mk-2206_ZINC000036382821	1	-8.5	4
Saperconazole_ZINC000163773658	1	-8.5	11
Hesperidin_ZINC000085340597	1	-8.5	15
Grapiprant_ZINC000038228051	1	-8.5	9
Falecalcitriol_ZINC000004474583	1	-8.5	11
Trecadrine_ZINC000005751639	1	-8.5	6
Volasertib_ZINC000100071772	1	-8.5	10
Spiroxatrine_ZINC000053113560	1	-8.5	3
Ketoconazole_ZINC000000643153	1	-8.5	7
Efatutazone_ZINC000033975064	1	-8.5	8
Dasabuvir_ZINC000095616937	1	-8.5	6
beta_Ergocryptine_ZINC000100071821	1	-8.5	6
Itraconazole_ZINC000003830975	1	-8.5	11
Hesperidin_ZINC000252008995	1	-8.5	15
Brazergoline_ZINC000004215062	1	-8.5	3
Razaxaban_ZINC000003633839	1	-8.5	8
Bagrosin_ZINC000026663185	1	-8.5	1
Hesperidin_ZINC000008680007	1	-8.5	15
Altiratinib_ZINC000113198271	1	-8.5	8
Saperconazole_ZINC000028712570	1	-8.5	11
Presatovir_ZINC000147513579	1	-8.5	6
Toquizine_ZINC000000608107	1	-8.5	2
Azd-7624_ZINC000002105298	1	-8.5	5
Lurtotecan_ZINC000022010625	1	-8.5	4
Tecovirimat_ZINC000035323125	1	-8.5	5
Gepotidacin_ZINC000138562667	1	-8.5	5
Nms-1286937_ZINC000049113058	1	-8.5	5
Hesperidin_ZINC000253499896	1	-8.5	15
Bisantrene_ZINC000001577736	1	-8.5	6
Irbesartan_ZINC000003872931	1	-8.5	7
Ac-480_ZINC000006717782	1	-8.5	8
Capeserod_ZINC000000603773	1	-8.5	6
Besonprodil_ZINC000027299445	1	-8.5	7
Taclamine_ZINC000001481926	1	-8.5	0
Nabazenil_ZINC000031475739	1	-8.5	12
Vestipitant_ZINC000003936035	1	-8.5	5
Teniposide_ZINC000077313309	1	-8.5	9
Tesevatinib_ZINC000117147301	1	-8.5	6
Trovafloxacin_ZINC000100030989	1	-8.5	4
Gsk-461364_ZINC000043154472	1	-8.5	8
Pilaralisib_ZINC000100472223	1	-8.5	9
Cyheptropine_ZINC000100372252	1	-8.4	3
Etoposide-phosphate_ZINC000306146643	1	-8.4	9
Netoglitazone_ZINC000001481955	1	-8.4	5
Mk-2461_ZINC000034842286	1	-8.4	6
Mozavaptan_ZINC000003804565	1	-8.4	4
Darglitazone_ZINC000001851105	1	-8.4	7
Taprostene_ZINC000004217507	1	-8.4	7
Evacetrapib_ZINC000150338934	1	-8.4	9
Acolbifene_ZINC000000598598	1	-8.4	8
Sepimostat_ZINC000003778392	1	-8.4	7
Befiradol_ZINC000001492397	1	-8.4	5
Veliflapon_ZINC000000598193	1	-8.4	6
Cenisertib_ZINC000063298059	1	-8.4	6
Fendosal_ZINC000004216021	1	-8.4	4
Hesperidin_ZINC000008680006	1	-8.4	15
Tamatinib_ZINC000006745792	1	-8.4	7
Floxacrine_ZINC000000607874	1	-8.4	3
Hesperidin_ZINC000008143568	1	-8.4	15
ipragliflozin_ZINC000669678948	1	-8.4	8
Ac-430_ZINC000095079936	1	-8.4	5
Triacetyldiphenolisatin_ZINC000004217281	1	-8.4	6
Terfenadine_ZINC000003831511	1	-8.4	11
Tesevatinib_ZINC000101781468	1	-8.4	6
Avatrombopag_ZINC000072190218	1	-8.4	7
Itraconazole_ZINC000003830976	1	-8.4	11
Lexacalcitol_ZINC000004474609	1	-8.4	12
Delafloxacin_ZINC000003827556	1	-8.4	5
Brigatinib_ZINC000148723177	1	-8.4	8
beta_Ergocryptine_ZINC000064633860	1	-8.4	6
Gdc-0994_ZINC000144904353	1	-8.4	7
Pretamazium_ZINC000004214179	1	-8.4	6
Englitazone_ZINC000005933617	1	-8.4	4
Ci-988_ZINC000014952320	1	-8.4	13
Ac-430_ZINC000095079935	1	-8.4	5
Paliperidone_ZINC000001481956	1	-8.4	5
Teniposide_ZINC000202773821	1	-8.4	9
Hesperidin_ZINC000103939005	1	-8.4	15
Mefeserpine_ZINC000004213752	1	-8.4	10
Mln-2480_ZINC000043202463	1	-8.4	7
Duvelisib_ZINC000088346058	1	-8.4	4
Trantelinium_ZINC000100368273	1	-8.4	3
Ambruticin_ZINC000008214482	1	-8.4	11
Bentiromide_ZINC000000608204	1	-8.4	8
Mk-0893_ZINC000068250425	1	-8.4	9
Letermovir_ZINC000100369359	1	-8.4	8
Englitazone_ZINC000005933666	1	-8.4	4
Paraflutizide_ZINC000001843075	1	-8.4	4
Etoposide-phosphate_ZINC000618072475	1	-8.4	9
Napitane_ZINC000003794361	1	-8.4	3
Englitazone_ZINC000005933614	1	-8.4	4
Drinabant_ZINC000059299699	1	-8.4	6
Pictilisib_ZINC000016052714	1	-8.4	5
Tivozanib_ZINC000001489430	1	-8.4	6
Siponimod_ZINC000006717453	1	-8.4	10
Fluproquazone_ZINC000000001475	1	-8.4	2
Ebastine_ZINC000003781952	1	-8.4	10
Hesperidin_ZINC000097972618	1	-8.4	15
Nabazenil_ZINC000040163161	1	-8.4	12
Talotrexin_ZINC000003807186	1	-8.4	14
Metergoline_ZINC000003812975	1	-8.4	5
Clopenthixol_ZINC000031483558	1	-8.4	6
Birinapant_ZINC000096941868	1	-8.4	17
ipragliflozin_ZINC000306122897	1	-8.4	8
Danusertib_ZINC000006718723	1	-8.4	6
Sulisatin_ZINC000004217484	1	-8.4	6
Gs-9667_ZINC000256680330	1	-8.4	9
Hesperidin_ZINC000067902505	1	-8.4	15
Polydatin_ZINC000003881959	1	-8.4	11
Merimepodib_ZINC000003975663	1	-8.4	8
Ormeloxifene_ZINC000001730389	1	-8.4	7
Teniposide_ZINC000049605898	1	-8.4	9
Deserpidine_ZINC000105090645	1	-8.4	9
alpha_Ergocryptine_ZINC000095810539	1	-8.4	6
Etoposide-phosphate_ZINC000306146644	1	-8.4	9
Yohimbic-acid_ZINC000009302199	1	-8.4	2
Palosuran_ZINC000034375693	1	-8.4	7
Saperconazole_ZINC000026168046	1	-8.4	11
Buclizine_ZINC000019364228	1	-8.4	6
Jnj-38877605_ZINC000043170515	1	-8.4	3
Lometrexol_ZINC000008577213	1	-8.4	11
Tioclomarol_ZINC000030691430	1	-8.4	6
Brequinar_ZINC000001587011	1	-8.4	3
Barmastine_ZINC000004214938	1	-8.4	7
Doretinel_ZINC000003785287	1	-8.4	5
Etoposide-phosphate_ZINC000306146642	1	-8.4	9
Napitane_ZINC000005934263	1	-8.4	3
Pd-0166285_ZINC000001486219	1	-8.4	9
Pimobendan_ZINC000004170129	1	-8.4	3
Seperidol_ZINC000000538335	1	-8.4	8
Encaleret_ZINC000066097848	1	-8.4	12
Gepotidacin_ZINC000223227887	1	-8.4	5
Proroxan_ZINC000000340372	1	-8.4	5
Doconazole_ZINC000001567316	1	-8.4	7
Verecimon_ZINC000038562120	1	-8.4	6
Azd-7762_ZINC000034885165	1	-8.3	4
Lidorestat_ZINC000000538652	1	-8.3	4
Ci-988_ZINC000014952331	1	-8.3	13
Pirenoxine_ZINC000011616009	1	-8.3	2
Adomeglivant_ZINC000117040417	1	-8.3	12
Dusquetide_ZINC000205877056	1	-8.3	16
Tolufazepam_ZINC000000538478	1	-8.3	5
Prulifloxacin_ZINC000000596006	1	-8.3	4
Quiflapon_ZINC000001914818	1	-8.3	10
Piketoprofen_ZINC000001846243	1	-8.3	5
Floxacrine_ZINC000001846338	1	-8.3	3
Pimozide_ZINC000004175630	1	-8.3	8
Afacifenacin_ZINC000003991067	1	-8.3	6
Etoposide_ZINC000003978071	1	-8.3	8
Tarafenacin_ZINC000000593626	1	-8.3	5
Hesperidin_ZINC000253499898	1	-8.3	15
Flotrenizine_ZINC000031597122	1	-8.3	10
Proscillaridin_ZINC000008214665	1	-8.3	7
Tesevatinib_ZINC000117147304	1	-8.3	6
Etoposide_ZINC000103553211	1	-8.3	8
Posaconazole_ZINC000072190231	1	-8.3	13
Nebivolol_ZINC000004213946	1	-8.3	8
Draquinolol_ZINC000004213051	1	-8.3	9
Alvimopan_ZINC000000598850	1	-8.3	9
Calcipotriene_ZINC000038599402	1	-8.3	8
Bitolterol_ZINC000003830323	1	-8.3	11
Hesperidin_ZINC000095568264	1	-8.3	15
Lurasidone_ZINC000003927822	1	-8.3	5
Indacaterol_ZINC000035801098	1	-8.3	8
Nafamostat_ZINC000003874467	1	-8.3	6
Raltegravir_ZINC000013831130	1	-8.3	6
Bexagliflozin_ZINC000072319782	1	-8.3	13
Tanogitran_ZINC000064527030	1	-8.3	10
Saperconazole_ZINC000028712571	1	-8.3	11
Umeclidinium_ZINC000034608502	1	-8.3	9
Posaconazole_ZINC000003938482	1	-8.3	13
Piketoprofen_ZINC000000000623	1	-8.3	5
Azaclorzine_ZINC000019804668	1	-8.3	3
Abt-102_ZINC000028964600	1	-8.3	3
Vanyldisulfamide_ZINC000003604324	1	-8.3	11
Etoposide_ZINC000100023538	1	-8.3	8
Temafloxacin_ZINC000002004103	1	-8.3	3
Zstk-474_ZINC000100683572	1	-8.3	1
Ilorasertib_ZINC000063298074	1	-8.3	8
Carebastine_ZINC000004215193	1	-8.3	11
Proscillaridin_ZINC000038139432	1	-8.3	7
Irindalone_ZINC000022463226	1	-8.3	5
Pipequaline_ZINC000001482144	1	-8.3	4
Revefenacin_ZINC000113648937	1	-8.3	11
Dilmapimod_ZINC000034997404	1	-8.3	8
Sitogluside_ZINC000118922613	1	-8.3	13
Rolapitant_ZINC000003816514	1	-8.3	7
Cinperene_ZINC000002018994	1	-8.3	5
Axelopran_ZINC000103298099	1	-8.3	11
Glucametacin_ZINC000575346762	1	-8.3	10
Selodenoson_ZINC000003989599	1	-8.3	7
Etoposide-phosphate_ZINC000618072473	1	-8.3	9
Mioflazine_ZINC000022463073	1	-8.3	10
Pf-00477736_ZINC000019862643	1	-8.3	5
Fiboflapon_ZINC000068247071	1	-8.3	13
Medibazine_ZINC000022463243	1	-8.3	5
Indinavir_ZINC000022448696	1	-8.3	14
Naxaprostene_ZINC000004217054	1	-8.3	7
Difloxacin_ZINC000004099034	1	-8.3	3
Hesperidin_ZINC000238924079	1	-8.3	15
Cort-108297_ZINC000029128012	1	-8.3	7
Trazium_ZINC000005935151	1	-8.3	2
Troglitazone_ZINC000000968279	1	-8.3	6
Teniposide_ZINC000202773837	1	-8.3	9
Fedratinib_ZINC000019862646	1	-8.3	11
Deserpidine_ZINC000003830663	1	-8.3	9
Azd-4547_ZINC000091352093	1	-8.3	8
Pirenperone_ZINC000000538194	1	-8.3	5
Etoposide-phosphate_ZINC000575418369	1	-8.3	9
Darifenacin_ZINC000001996117	1	-8.3	7
Gsk-461364_ZINC000059715991	1	-8.3	8
Saredutant_ZINC000003927605	1	-8.3	9
Topotecan_ZINC000001611274	1	-8.3	5
Tezacaftor_ZINC000113568483	1	-8.3	11
Vismodegib_ZINC000040899447	1	-8.3	4
Pazopanib_ZINC000011617039	1	-8.3	6
Etoposide_ZINC000011615742	1	-8.3	8
Indiplon_ZINC000000538650	1	-8.3	4
Cabotegravir_ZINC000096927633	1	-8.3	4
Guadecitabine_ZINC000575627124	1	-8.3	13
Carmoterol_ZINC000034853956	1	-8.3	9
Edatrexate_ZINC000001618702	1	-8.3	12
Daclatasvir_ZINC000068204830	1	-8.3	13
Tg-02_ZINC000095938323	1	-8.3	0
Hesperidin_ZINC000252008992	1	-8.3	15
Posaconazole_ZINC000028639340	1	-8.3	13
Nafiverine_ZINC000022463090	1	-8.3	12
Teniposide_ZINC000095628282	1	-8.3	9
Axamozide_ZINC000004212030	1	-8.3	3
Mk-2461_ZINC000034842284	1	-8.3	6
Metoquizine_ZINC000038424542	1	-8.3	1
Abamectin-component-b1a_ZINC000252673974	1	-8.3	11
Fosdagrocorat_ZINC000103298102	1	-8.3	7
Clazosentan_ZINC000003939238	1	-8.3	12
Hesperidin_ZINC000238924080	1	-8.3	15
Etoposide-phosphate_ZINC000245205035	1	-8.3	9
Acoxatrine_ZINC000001640527	1	-8.3	5
Incb-9471_ZINC000043171152	1	-8.3	6
Hesperidin_ZINC000238924078	1	-8.3	15
Bi-2536_ZINC000013986815	1	-8.3	7
Sulindac_ZINC000031356637	1	-8.3	4
Abamectin-component-b1a_ZINC000242649031	1	-8.3	11
Monatepil_ZINC000000607979	1	-8.3	6
alpha_Ergocryptine_ZINC000017654092	1	-8.3	6
Prulifloxacin_ZINC000001269201	1	-8.2	4
Gliquidone_ZINC000001482077	1	-8.2	9
Lifarizine_ZINC000019368434	1	-8.2	6
Acoxatrine_ZINC000005196905	1	-8.2	5
Flibanserin_ZINC000052716421	1	-8.2	5
Phenomorphan_ZINC000004217283	1	-8.2	4
Reglitazar_ZINC000084462508	1	-8.2	7
Garenoxacin_ZINC000003585048	1	-8.2	5
Ketoconazole_ZINC000003872994	1	-8.2	7
Dofequidar_ZINC000026180140	1	-8.2	9
Bedoradrine_ZINC000000584203	1	-8.2	12
Relenopride_ZINC000118666544	1	-8.2	11
Etoposide-phosphate_ZINC000575418368	1	-8.2	9
Palinavir_ZINC000003936474	1	-8.2	16
Posaconazole_ZINC000220105129	1	-8.2	13
Ritolukast_ZINC000000538316	1	-8.2	6
Tolnapersine_ZINC000001846110	1	-8.2	3
Sovaprevir_ZINC000085537149	1	-8.2	14
Hesperidin_ZINC000247658398	1	-8.2	15
Entinostat_ZINC000001488870	1	-8.2	8
Pipecuronium_ZINC000003938681	1	-8.2	6
Posaconazole_ZINC000164119553	1	-8.2	13
Nitroblue-tetrazolium_ZINC000008214433	1	-8.2	11
Tefludazine_ZINC000022463345	1	-8.2	6
Lombazole_ZINC000005425510	1	-8.2	4
Paranyline_ZINC000001482136	1	-8.2	3
Pemedolac_ZINC000000000590	1	-8.2	5
Amg-548_ZINC000073336080	1	-8.2	8
Zidapamide_ZINC000004214668	1	-8.2	4
Vesnarinone_ZINC000003781942	1	-8.2	4
Tadalafil_ZINC000003993855	1	-8.2	1
Cabozantinib_ZINC000070466416	1	-8.2	8
Calcipotriene_ZINC000100517384	1	-8.2	8
Oxarbazole_ZINC000000000574	1	-8.2	3
Teniposide_ZINC000254077833	1	-8.2	9
Cyheptamide_ZINC000000001236	1	-8.2	1
Enadoline_ZINC000001914437	1	-8.2	4
Sb-705498_ZINC000034297799	1	-8.2	4
Sapitinib_ZINC000034587071	1	-8.2	7
Hydroxyestrone_diacetate_ZINC000005228515	1	-8.2	4
Bisoxatin-acetate_ZINC000000608211	1	-8.2	6
Zanapezil_ZINC000000598255	1	-8.2	6
Abamectin-component-b1a_ZINC000252673976	1	-8.2	11
Etoposide_ZINC000143020573	1	-8.2	8
Folitixorin_ZINC000004654260	1	-8.2	8
Edatrexate_ZINC000001618703	1	-8.2	12
Dacuronium_ZINC000004212779	1	-8.2	5
Picotrin_ZINC000004217296	1	-8.2	5
Forasartan_ZINC000005139136	1	-8.2	10
Fluralaner_ZINC000095598447	1	-8.2	8
Quinaldine-blue_ZINC000001687632	1	-8.2	4
Azd-7762_ZINC000033359230	1	-8.2	4
Itraconazole_ZINC000003830974	1	-8.2	11
Sarolaner_ZINC000103297729	1	-8.2	5
Azilsartan_ZINC000000598390	1	-8.2	7
Etoposide_ZINC000003938684	1	-8.2	8
Doconazole_ZINC000013207499	1	-8.2	7
Terconazole_ZINC000000897382	1	-8.2	8
Gdc-0994_ZINC000144904566	1	-8.2	7
Ethyl-biscoumacetate_ZINC000000608360	1	-8.2	5
Hesperidin_ZINC000038144568	1	-8.2	15
Fluperamide_ZINC000004216287	1	-8.2	9
Ci-988_ZINC000003920670	1	-8.2	13
Reglitazar_ZINC000006069082	1	-8.2	7
Saperconazole_ZINC000003913989	1	-8.2	11
Edaglitazone_ZINC000001483899	1	-8.2	7
Ceritinib_ZINC000096272772	1	-8.2	9
Etoposide-phosphate_ZINC000072186776	1	-8.2	9
Rispenzepine_ZINC000000004265	1	-8.2	1
Nicomol_ZINC000004213975	1	-8.2	17
Droxicam_ZINC000000597502	1	-8.2	1
Folic-acid_ZINC000008585850	1	-8.2	11
Rupatadine_ZINC000000598829	1	-8.2	2
Enpiroline_ZINC000001568035	1	-8.2	6
Prasterone_acetate_ZINC000003881408	1	-8.2	2
Deserpidine_ZINC000004097186	1	-8.2	9
Mk-6592_ZINC000043153387	1	-8.2	7
Paraflutizide_ZINC000000608014	1	-8.2	4
Hesperidin_ZINC000103938998	1	-8.2	15
Hesperidin_ZINC000252009000	1	-8.2	15
Sd-0006_ZINC000006718469	1	-8.2	5
Zidapamide_ZINC000000608139	1	-8.2	4
Fluindarol_ZINC000100229169	1	-8.2	2
Sitogluside_ZINC000118913172	1	-8.2	13
Hesperidin_ZINC000100204058	1	-8.2	15
Mocetinostat_ZINC000013986811	1	-8.2	7
Falnidamol_ZINC000001494443	1	-8.2	4
Elomotecan_ZINC000003921664	1	-8.2	4
Metoquizine_ZINC000000607966	1	-8.2	1
Abt-102_ZINC000028964595	1	-8.2	3
Rebamipide_ZINC000009330880	1	-8.2	5
Lufuradom_ZINC000004213704	1	-8.2	4
Etoposide_ZINC000011615747	1	-8.2	8
Pf-03715455_ZINC000082138051	1	-8.2	13
Plinabulin_ZINC000003819466	1	-8.2	3
Hesperidin_ZINC000253499899	1	-8.2	15
Nantradol_ZINC000030691106	1	-8.2	9
Frabuprofen_ZINC000031555620	1	-8.2	10
Teniposide_ZINC000049605896	1	-8.2	9
Lorpiprazole_ZINC000033827894	1	-8.2	5
Flavoxate_ZINC000000608382	1	-8.2	6
Flutroline_ZINC000049590110	1	-8.2	7
Rimacalib_ZINC000004423231	1	-8.2	4
Sitogluside_ZINC000118922614	1	-8.2	13
Edifolone_ZINC000004215756	1	-8.2	3
Declenperone_ZINC000004215520	1	-8.2	6
Pf-00477736_ZINC000137899389	1	-8.2	5
Nicodicodine_ZINC000004217090	1	-8.2	4
Tiflamizole_ZINC000000538458	1	-8.2	5
Trelanserin_ZINC000000602552	1	-8.2	6
Aprepitant_ZINC000059125344	1	-8.2	8
Etoposide-phosphate_ZINC000245205037	1	-8.2	9
Sgi-1776_ZINC000068205235	1	-8.2	6
Niravoline_ZINC000000607401	1	-8.2	5
Bilastine_ZINC000003822702	1	-8.2	10
Reminertant_ZINC000001482927	1	-8.2	7
Rilapladib_ZINC000003973276	1	-8.2	13
Leq506_ZINC000103298500	1	-8.2	6
Temsavir_ZINC000034815611	1	-8.2	5
Terutroban_ZINC000003811419	1	-8.2	6
Fasiglifam_ZINC000068208039	1	-8.2	11
Nilprazole_ZINC000022463265	1	-8.2	9
Nolpitantium_ZINC000003922699	1	-8.2	9
Hesperidin_ZINC000038144570	1	-8.2	15
Englitazone_ZINC000005933664	1	-8.2	4
Draflazine_ZINC000022447482	1	-8.2	12
Sarafloxacin_ZINC000000538330	1	-8.2	3
Bradanicline_ZINC000064540331	1	-8.2	4
Carmoxirole_ZINC000001533114	1	-8.2	7
Doretinel_ZINC000011679570	1	-8.2	5
Etoposide_ZINC000079228615	1	-8.2	8
Pf-04217903_ZINC000043195316	1	-8.2	6
Ulifloxacin_ZINC000004655141	1	-8.2	2
Fexofenadine_ZINC000003824921	1	-8.2	12
Etoposide_ZINC000015449127	1	-8.2	8
Itraconazole_ZINC000004097343	1	-8.1	11
Piflutixol_ZINC000031297681	1	-8.1	7
Lamifiban_ZINC000003782835	1	-8.1	11
Cetefloxacin_ZINC000003779887	1	-8.1	4
Lovastatin_ZINC000043772721	1	-8.1	8
Proscillaridin_ZINC000257355133	1	-8.1	7
Teniposide_ZINC000003831509	1	-8.1	9
Posaconazole_ZINC000060392779	1	-8.1	13
Biricodar_ZINC000003945332	1	-8.1	16
Infigratinib_ZINC000072105034	1	-8.1	8
Capromorelin_ZINC000011678025	1	-8.1	10
Clothixamide_ZINC000000608277	1	-8.1	6
Napitane_ZINC000000005009	1	-8.1	3
Maropitant_ZINC000040664622	1	-8.1	8
Gsk-2636771_ZINC000077024226	1	-8.1	5
Deserpidine_ZINC000257400371	1	-8.1	9
Axitinib_ZINC000003816287	1	-8.1	5
Pipendoxifene_ZINC000000602799	1	-8.1	9
ipragliflozin_ZINC000306122899	1	-8.1	8
Sumetizide_ZINC000004214359	1	-8.1	4
Azd-4547_ZINC000091352092	1	-8.1	8
Talnetant_ZINC000001543566	1	-8.1	6
Pyrinoline_ZINC000000538243	1	-8.1	6
Revizinone_ZINC000000538290	1	-8.1	6
Troglitazone_ZINC000000968277	1	-8.1	6
Teniposide_ZINC000203773037	1	-8.1	9
Tezacaftor_ZINC000068206930	1	-8.1	11
Batefenterol_ZINC000096941866	1	-8.1	16
Bitopertin_ZINC000053294263	1	-8.1	7
Posizolid_ZINC000003982517	1	-8.1	9
ipragliflozin_ZINC000138361877	1	-8.1	8
Hesperidin_ZINC000103938984	1	-8.1	15
Salazosulfadimidine_ZINC000004194759	1	-8.1	8
Sivifene_ZINC000003914981	1	-8.1	8
Bendroflumethiazide_ZINC000000601301	1	-8.1	5
Ph-797804_ZINC000013980453	1	-8.1	5
Prazosin_ZINC000095616601	1	-8.1	5
Balaglitazone_ZINC000001481805	1	-8.1	5
Mitratapide_ZINC000003946578	1	-8.1	12
Lxr-623_ZINC000040379749	1	-8.1	4
Tamolarizine_ZINC000022440925	1	-8.1	9
Asp-3026_ZINC000068120928	1	-8.1	9
Nicergoline_ZINC000003873817	1	-8.1	5
Pretiadil_ZINC000033854782	1	-8.1	7
Glucametacin_ZINC000097974783	1	-8.1	10
Abamectin-component-b1a_ZINC000242649029	1	-8.1	11
Nifuroquine_ZINC000001842848	1	-8.1	3
Enpiroline_ZINC000001568036	1	-8.1	6
Vatalanib_ZINC000000007460	1	-8.1	4
Butaclamol_ZINC000040933021	1	-8.1	2
Etoposide-phosphate_ZINC000003920020	1	-8.1	9
Fasitibant_ZINC000095606973	1	-8.1	13
Enpiroline_ZINC000001568034	1	-8.1	6
Cort-108297_ZINC000141514903	1	-8.1	7
Ibipinabant_ZINC000013559250	1	-8.1	4
Mozavaptan_ZINC000006071859	1	-8.1	4
Rubitecan_ZINC000003827362	1	-8.1	3
Florantyrone_ZINC000002036732	1	-8.1	4
Abt-107_ZINC000038304971	1	-8.1	3
Azelastine_ZINC000000897240	1	-8.1	3
Polydatin_ZINC000108555676	1	-8.1	11
Octrizole_ZINC000001849911	1	-8.1	5
Tioperidone_ZINC000004217575	1	-8.1	9
Monatepil_ZINC000001851142	1	-8.1	6
Bexagliflozin_ZINC000208242340	1	-8.1	13
Evatanepag_ZINC000001494905	1	-8.1	10
Etoposide_ZINC000015449129	1	-8.1	8
Polydatin_ZINC000003881962	1	-8.1	11
Etoposide_ZINC000003977873	1	-8.1	8
Ftormetazine_ZINC000019338440	1	-8.1	4
Dalvastatin_ZINC000002020500	1	-8.1	4
Propisergide_ZINC000059868006	1	-8.1	4
Edoxaban_ZINC000043200832	1	-8.1	6
Olcegepant_ZINC000098052868	1	-8.1	13
Gandotinib_ZINC000068245097	1	-8.1	6
Saprisartan-potassium_ZINC000003919581	1	-8.1	9
Ketoconazole_ZINC000000643138	1	-8.1	7
Domperidone_ZINC000004175569	1	-8.1	7
Pipoxolan_ZINC000002017397	1	-8.1	5
Vandetanib_ZINC000053683345	1	-8.1	6
Saperconazole_ZINC000004214295	1	-8.1	11
Praziquantel_ZINC000000403566	1	-8.1	1
Etoposide_ZINC000003977874	1	-8.1	8
Tebuquine_ZINC000001585700	1	-8.1	7
Glucametacin_ZINC000110343953	1	-8.1	10
Flufylline_ZINC000000537738	1	-8.1	5
Z160_ZINC000020509316	1	-8.1	7
Loperamide-oxide_ZINC000261506627	1	-8.1	8
Regadenoson_ZINC000003598383	1	-8.1	8
Ansoxetine_ZINC000005957953	1	-8.1	7
Indibulin_ZINC000037866151	1	-8.1	5
Draflazine_ZINC000022851754	1	-8.1	12
Sertindole_ZINC000000538337	1	-8.1	5
Indapamide_ZINC000000601305	1	-8.1	4
Tixadil_ZINC000006036855	1	-8.1	6
Glisentide_ZINC000000537793	1	-8.1	8
Anatibant_ZINC000053261548	1	-8.1	13
Flutiazin_ZINC000000001478	1	-8.1	2
ipragliflozin_ZINC000605694508	1	-8.1	8
Aee-788_ZINC000033196300	1	-8.1	7
Sparsentan_ZINC000006716826	1	-8.1	12
Etoposide_ZINC000079216638	1	-8.1	8
Hesperidin_ZINC000038144571	1	-8.1	15
Bms-777607_ZINC000039716080	1	-8.1	8
Benazeprilat_ZINC000003814184	1	-8.1	8
Metopimazine_ZINC000000537996	1	-8.1	6
Fostemsavir_ZINC000014210883	1	-8.1	8
Pyrvinium_ZINC000003831401	1	-8.1	4
Tamibarotene_ZINC000000538415	1	-8.1	3
Talazoparib_ZINC000072318110	1	-8.1	2
Laprafylline_ZINC000022463231	1	-8.1	8
Panamesine_ZINC000003801505	1	-8.1	6
Omidoline_ZINC000005318621	1	-8.1	6
Ciprafamide_ZINC000004215363	1	-8.1	5
Cc-401_ZINC000038836256	1	-8.1	6
Ponazuril_ZINC000033854754	1	-8.1	5
Yohimbic-acid_ZINC000003881708	1	-8.1	2
Hesperidin_ZINC000049889104	1	-8.1	15
Embusartan_ZINC000001539013	1	-8.1	9
Pimobendan_ZINC000005071680	1	-8.1	3
Teniposide_ZINC000245190531	1	-8.1	9
Edonentan_ZINC000001481808	1	-8.1	9
At-7519_ZINC000016052857	1	-8.1	4
Sitogluside_ZINC000253558546	1	-8.1	13
Dasatinib_ZINC000003986735	1	-8.1	8
Posaconazole_ZINC000060392780	1	-8.1	13
Draquinolol_ZINC000034167971	1	-8.1	9
Scopinast_ZINC000003944646	1	-8.1	10
Filorexant_ZINC000043201232	1	-8.1	5
Pyronaridine_ZINC000003882897	1	-8.1	8
Pf-03758309_ZINC000043203531	1	-8.1	6
Sb-649868_ZINC000043207236	1	-8.1	5
Romergoline_ZINC000003782563	1	-8.1	2
Kw-2449_ZINC000043201999	1	-8.1	3
Nabazenil_ZINC000031475748	1	-8.1	12
Lusaperidone_ZINC000001903948	1	-8.1	3
Tarafenacin_ZINC000003965738	1	-8	5
Lirequinil_ZINC000003784128	1	-8	4
Pf-00446687_ZINC000144234053	1	-8	5
Gliflumide_ZINC000001481851	1	-8	10
Brecanavir_ZINC000003994828	1	-8	16
Tolvaptan_ZINC000001490477	1	-8	4
Salazodine_ZINC000003917759	1	-8	9
Elvitegravir_ZINC000013682481	1	-8	8
Etoposide_ZINC000003925951	1	-8	8
Calcipotriene_ZINC000065731407	1	-8	8
Furostilbestrol_ZINC000000537772	1	-8	10
Setipafant_ZINC000001481922	1	-8	3
Frabuprofen_ZINC000004213393	1	-8	10
Quisinostat_ZINC000035836133	1	-8	7
Omecamtiv-mecarbil_ZINC000038253214	1	-8	5
Folitixorin_ZINC000004228243	1	-8	8
Teoprolol_ZINC000001846190	1	-8	10
Suvorexant_ZINC000049036447	1	-8	3
Cp-724714_ZINC000018710086	1	-8	9
Lovastatin_ZINC000008681778	1	-8	8
Mk-7246_ZINC000034804182	1	-8	5
Teniposide_ZINC000004099009	1	-8	9
Prasterone_acetate_ZINC000043759614	1	-8	2
Zuclopenthixol_acetate_ZINC000030691716	1	-8	7
Gs-9667_ZINC000256680333	1	-8	9
Azd-1775_ZINC000063539231	1	-8	8
Polydatin_ZINC000096032073	1	-8	11
Cp-724714_ZINC000003817105	1	-8	9
Butaclamol_ZINC000002008410	1	-8	2
Ertugliflozin_ZINC000068197809	1	-8	10
Bazedoxifene_ZINC000001895505	1	-8	9
Funapide_ZINC000113473392	1	-8	3
Myfadol_ZINC000001999515	1	-8	5
Sitogluside_ZINC000253609315	1	-8	13
Fevipiprant_ZINC000043101772	1	-8	6
Lestaurtinib_ZINC000003781738	1	-8	5
Etoposide_ZINC000100042690	1	-8	8
Equilin_ZINC000100031739	1	-8	1
Verubecestat_ZINC000144542146	1	-8	3
Glucametacin_ZINC000080060453	1	-8	10
Enmd-2076_ZINC000034885047	1	-8	5
Aprepitant_ZINC000043770784	1	-8	8
Fendizoate_ZINC000000001431	1	-8	5
Fidarestat_ZINC000000002486	1	-8	1
Cloroperone_ZINC000004215442	1	-8	7
Viroxime_ZINC000017130448	1	-8	5
Benperidol_ZINC000009232411	1	-8	6
Rg-7603_ZINC000095587536	1	-8	5
Polydatin_ZINC000003881960	1	-8	11
Etoposide_ZINC000003978073	1	-8	8
Nirogacestat_ZINC000038217838	1	-8	11
Radezolid_ZINC000040379938	1	-8	8
Polydatin_ZINC000003881961	1	-8	11
Ly-518674_ZINC000000595076	1	-8	9
Oxyphenisatin_acetate_ZINC000003831258	1	-8	6
Lopinavir_ZINC000003951740	1	-8	16
Taltirelin_ZINC000004217500	1	-8	6
Gs-9667_ZINC000256680332	1	-8	9
Terconazole_ZINC000003873935	1	-8	8
Solypertine_ZINC000004214326	1	-8	5
Glibornuride_ZINC000002012812	1	-8	6
Neflumozide_ZINC000000538067	1	-8	5
Vicriviroc_ZINC000022010579	1	-8	7
Devazepide_ZINC000001847292	1	-8	3
Etoposide-phosphate_ZINC000575418370	1	-8	9
Indapamide_ZINC000000643114	1	-8	4
Nirogacestat_ZINC000038217836	1	-8	11
Remogliflozin-etabonate_ZINC000003979756	1	-8	15
Camostat_ZINC000003871842	1	-8	9
Teniposide_ZINC000245190530	1	-8	9
Itraconazole_ZINC000028007115	1	-8	11
Fidarestat_ZINC000003789766	1	-8	1
Bifonazole_ZINC000003871723	1	-8	4
Polydatin_ZINC000000899166	1	-8	11
Zoniporide_ZINC000003933046	1	-8	3
Etoposide_ZINC000103553199	1	-8	8
Ataciguat_ZINC000003612878	1	-8	7
Methyldihydromorphine_ZINC000004216906	1	-8	2
Yohimbic-acid_ZINC000003947440	1	-8	2
Hydroxyestrone_diacetate_ZINC000002557209	1	-8	4
Lotrifen_ZINC000000001637	1	-8	1
Tedalinab_ZINC000072266313	1	-8	3
Ecenofloxacin_ZINC000031495028	1	-8	4
Morphine_ZINC000000403034	1	-8	2
Bemetizide_ZINC000001842746	1	-8	4
Spiclomazine_ZINC000000538363	1	-8	4
Chloroserpidine_ZINC000004212444	1	-8	9
Pevonedistat_ZINC000058660702	1	-8	8
Ticagrelor_ZINC000605696438	1	-8	13
Glisoxepide_ZINC000000537804	1	-8	7
Cediranib_ZINC000003948085	1	-8	8
Bumetrizole_ZINC000000056954	1	-8	3
Reserpine_ZINC000003978051	1	-8	10
Posaconazole_ZINC000060392777	1	-8	13
Dapitant_ZINC000003932681	1	-8	8
Hydroxystenozole_ZINC000004430803	1	-8	1
Sitogluside_ZINC000253609313	1	-8	13
R-1487_ZINC000058633224	1	-8	4
Spirendolol_ZINC000001846186	1	-8	7
Perbufylline_ZINC000033852267	1	-8	7
Adimolol_ZINC000001999501	1	-8	10
Tiodazosin_ZINC000001846466	1	-8	6
Ansoxetine_ZINC000005957963	1	-8	7
Cinuperone_ZINC000031425112	1	-8	6
Yohimbic-acid_ZINC000072186823	1	-8	2
Azd-2014_ZINC000059259288	1	-8	6
Trenizine_ZINC000072266906	1	-8	10
Hesperidin_ZINC000038144569	1	-8	15
Etriciguat_ZINC000000603759	1	-8	5
Bgt-226_ZINC000073069304	1	-8	5
Ranirestat_ZINC000000598588	1	-8	2
Dofequidar_ZINC000013652236	1	-8	9
Entospletinib_ZINC000098208742	1	-8	4
Terikalant_ZINC000003784096	1	-8	6
Otamixaban_ZINC000001908051	1	-8	10
Tosufloxacin_ZINC000021983587	1	-8	4
Teniposide_ZINC000067957215	1	-8	9
Desocriptine_ZINC000004212849	1	-8	6
Hesperidin_ZINC000008382286	1	-8	15
Mk-0249_ZINC000038269036	1	-8	7
Iti-007_ZINC000143595671	1	-8	5
Rivaroxaban_ZINC000001494180	1	-8	5
Reserpine_ZINC000003938746	1	-8	10
Etoposide_ZINC000003830817	1	-8	8
Pipenzolate_ZINC000000601314	1	-8	7
Tanzisertib_ZINC000100285204	1	-8	6
Navitoclax_ZINC000150338726	1	-8	17
Crizotinib_ZINC000035902488	1	-8	6
Cariprazine_ZINC000100153731	1	-8	5
Fludoxopone_ZINC000000537737	1	-8	5
Quinaprilat_ZINC000004217387	1	-8	8
Bemotrizinol_ZINC000011677894	1	-8	19
Sabiporide_ZINC000033999019	1	-8	4
Nuclotixene_ZINC000031477144	1	-8	1
Alvimopan_ZINC000136850645	1	-8	9
Vinmegallate_ZINC000072266239	1	-8	8
Glucametacin_ZINC000080060444	1	-8	10
Teniposide_ZINC000049605897	1	-8	9
Fostamatinib_ZINC000043131420	1	-8	10
Diniprofylline_ZINC000001999280	1	-8	9
Benzthiazide_ZINC000003871698	1	-8	6
Sumarotene_ZINC000001541060	1	-8	3
Androisoxazole_ZINC000013640952	1	-8	1
Glisolamide_ZINC000000537802	1	-8	7
Sitafloxacin_ZINC000003795983	1	-8	4
Nicofetamide_ZINC000014684145	1	-8	5
Empagliflozin_ZINC000036520252	1	-8	10
Terfenadine_ZINC000003812892	1	-8	11
Pleconaril_ZINC000001537619	1	-8	7
Abamectin-component-b1a_ZINC000245224132	1	-8	11
Abamectin-component-b1a_ZINC000252673975	1	-8	11
Flucetorex_ZINC000000607879	1	-8	8
Candesartan_ZINC000003782818	1	-8	7
Orotirelin_ZINC000004217208	1	-8	6
ipragliflozin_ZINC000165806297	1	-8	8
Tacrolimus_ZINC000169289411	1	-8	10
Apitolisib_ZINC000059224388	1	-8	7
Epicainide_ZINC000000000251	1	-8	7
Tiomergine_ZINC000004217573	1	-8	3
Strychnine_ZINC000000119434	1	-8	0
Belnacasan_ZINC000003963010	1	-8	9
Tg-02_ZINC000068251500	1	-8	0
Galunisertib_ZINC000003959536	1	-8	3
Nirogacestat_ZINC000038217837	1	-8	11
Piroheptine_ZINC000001481900	1	-8	1
Suclofenide_ZINC000001842729	1	-8	4
Prasterone_acetate_ZINC000043759612	1	-8	2
Lotrafiban_ZINC000003812598	1	-8	4
Pirenzepine_ZINC000019632927	1	-8	2
Posaconazole_ZINC000060392778	1	-8	13
Yohimbic-acid_ZINC000003947438	1	-8	2
Teniposide_ZINC000150652472	1	-8	9
Diphenadione_ZINC000100044649	1	-8	4
Efloxate_ZINC000000001342	1	-8	6
Am-211_ZINC000043206277	1	-7.9	10
Blonanserin_ZINC000000597434	1	-7.9	3
Delavirdine_ZINC000018516586	1	-7.9	6
Palovarotene_ZINC000038467831	1	-7.9	5
Sulfasalazine_ZINC000100031653	1	-7.9	8
ipragliflozin_ZINC000205605627	1	-7.9	8
Picodralazine_ZINC000000001943	1	-7.9	4
Moquizone_ZINC000031290966	1	-7.9	3
Fluprofylline_ZINC000000537750	1	-7.9	6
Tak-715_ZINC000006717791	1	-7.9	5
Clopamide_ZINC000000057236	1	-7.9	4
Hesperidin_ZINC000248139797	1	-7.9	15
ipragliflozin_ZINC000165806177	1	-7.9	8
Liroldine_ZINC000000537922	1	-7.9	5
Nvp-auy922_ZINC000100015656	1	-7.9	9
Calcipotriene_ZINC000003921872	1	-7.9	8
Eribaxaban_ZINC000003816482	1	-7.9	5
Tropodifene_ZINC000100376960	1	-7.9	8
Cloperidone_ZINC000004215426	1	-7.9	5
Xl-228_ZINC000203005669	1	-7.9	8
Azd-6482_ZINC000038628584	1	-7.9	5
Prenoxdiazine_ZINC000000538227	1	-7.9	7
Cintazone_ZINC000001680067	1	-7.9	5
Saracatinib_ZINC000024811973	1	-7.9	8
Rivaroxaban_ZINC000003964126	1	-7.9	5
ipragliflozin_ZINC000038897728	1	-7.9	8
Aprepitant_ZINC000027428713	1	-7.9	8
Patamostat_ZINC000005840106	1	-7.9	8
Hesperidin_ZINC000100204049	1	-7.9	15
Ontazolast_ZINC000000005761	1	-7.9	5
Polydatin_ZINC000142857948	1	-7.9	11
Dalvastatin_ZINC000000597504	1	-7.9	4
Droperidol_ZINC000019796080	1	-7.9	6
Rgb-286638_ZINC000043128366	1	-7.9	8
Mosapride_ZINC000020621755	1	-7.9	8
Flupentixol_ZINC000029489118	1	-7.9	7
Calcipotriene_ZINC000077285174	1	-7.9	8
Vindesine_ZINC000008214470	1	-7.9	10
Trabodenoson_ZINC000642805871	1	-7.9	8
Bemotrizinol_ZINC000011677890	1	-7.9	19
Sgx-523_ZINC000039129916	1	-7.9	3
Lopinavir_ZINC000100028551	1	-7.9	16
Omarigliptin_ZINC000084758480	1	-7.9	4
Argatroban_ZINC000003917722	1	-7.9	9
Ly-2874455_ZINC000113514933	1	-7.9	8
Ethyl-carfluzepate_ZINC000001846187	1	-7.9	4
Flutemazepam_ZINC000002005018	1	-7.9	2
Solcitinib_ZINC000118401631	1	-7.9	4
Triciribine-phosphate_ZINC000017104328	1	-7.9	7
Sb-705498_ZINC000013985502	1	-7.9	4
Toquizine_ZINC000005317406	1	-7.9	2
Hydromorphone_sulfate_ZINC000097974884	1	-7.9	2
Indisetron_ZINC000100102461	1	-7.9	2
Motesanib_ZINC000018710082	1	-7.9	5
Beperidium_ZINC000005688398	1	-7.9	6
Pholcodine_ZINC000033839044	1	-7.9	5
Permethrin_ZINC000001850374	1	-7.9	7
Itraconazole_ZINC000004097344	1	-7.9	11
Spirilene_ZINC000000538370	1	-7.9	5
Rivoglitazone_ZINC000004214702	1	-7.9	6
Flotrenizine_ZINC000022463051	1	-7.9	10
Lovastatin_ZINC000027646885	1	-7.9	8
Methoserpidine_ZINC000004213820	1	-7.9	10
Raltitrexed_ZINC000001625751	1	-7.9	9
Regadenoson_ZINC000011617063	1	-7.9	8
Linopirdine_ZINC000000537908	1	-7.9	5
Ji-101_ZINC000038255464	1	-7.9	6
Gilteritinib_ZINC000113476229	1	-7.9	9
Triciribine-phosphate_ZINC000003916663	1	-7.9	7
Vx-702_ZINC000036377992	1	-7.9	4
Zafirlukast_ZINC000000896717	1	-7.9	10
Epsiprantel_ZINC000001842759	1	-7.9	1
Zopiclone_ZINC000019632834	1	-7.9	3
Prasterone_acetate_ZINC000253498202	1	-7.9	2
Axamozide_ZINC000006117407	1	-7.9	4
Piboserod_ZINC000001537633	1	-7.9	6
Otenabant_ZINC000003948997	1	-7.9	6
Arzoxifene_ZINC000001544683	1	-7.9	9
Micinicate_ZINC000013884308	1	-7.9	7
Ramosetron_ZINC000003873275	1	-7.9	2
Erteberel_ZINC000012353762	1	-7.9	3
Aseripide_ZINC000082125620	1	-7.9	9
Buterizine_ZINC000022463149	1	-7.9	9
Oxarbazole_ZINC000002008674	1	-7.9	3
Ocinaplon_ZINC000000005014	1	-7.9	3
Axitirome_ZINC000011677432	1	-7.9	10
Diacetylmorphine_ZINC000004097183	1	-7.9	4
Sopitazine_ZINC000000538361	1	-7.9	1
Timcodar_ZINC000008214468	1	-7.9	18
Aprepitant_ZINC000014768568	1	-7.9	8
Cyclopenthiazide_ZINC000000601312	1	-7.9	4
Nepaprazole_ZINC000004626670	1	-7.9	3
Grepafloxacin_ZINC000000587541	1	-7.9	3
Estrone_ZINC000013509425	1	-7.9	1
Mazapertine_ZINC000052956332	1	-7.9	6
Yohimbic-acid_ZINC000247338215	1	-7.9	2
Rucaparib_ZINC000000025958	1	-7.9	3
Osi-027_ZINC000252286769	1	-7.9	5
Calcipotriene_ZINC000038791645	1	-7.9	8
Puromycin_ZINC000053147179	1	-7.9	11
Polydatin_ZINC000021983181	1	-7.9	11
Mk-8033_ZINC000068203670	1	-7.9	6
Gsk239512_ZINC000003961802	1	-7.9	4
Peraquinsin_ZINC000004214134	1	-7.9	7
Spiroxatrine_ZINC000053113561	1	-7.9	3
Polydatin_ZINC000065748638	1	-7.9	11
Tiospirone_ZINC000001915508	1	-7.9	6
Meclizine_ZINC000019594557	1	-7.9	5
Clodanolene_ZINC000000001181	1	-7.9	3
Sofosbuvir_ZINC000100074252	1	-7.9	12
Flubepride_ZINC000000607878	1	-7.9	8
Sitogluside_ZINC000253558545	1	-7.9	13
Polydatin_ZINC000039205864	1	-7.9	11
Lovastatin_ZINC000043772719	1	-7.9	8
Pazoxide_ZINC000001846472	1	-7.9	1
Lasofoxifene_ZINC000003918428	1	-7.9	7
Ly-2874455_ZINC000097758759	1	-7.9	8
Tolnapersine_ZINC000000000792	1	-7.9	3
Talniflumate_ZINC000001844627	1	-7.9	6
Etomidoline_ZINC000003872532	1	-7.9	7
Litomeglovir_ZINC000084759446	1	-7.9	11
Lovastatin_ZINC000014984346	1	-7.9	8
Ataluren_ZINC000013831791	1	-7.9	3
Glucametacin_ZINC000097974785	1	-7.9	10
Aprepitant_ZINC000043770782	1	-7.9	8
Ezlopitant_ZINC000040664618	1	-7.9	8
Pravadoline_ZINC000030691168	1	-7.9	6
Bms-582949_ZINC000036475284	1	-7.9	7
Etarotene_ZINC000084758242	1	-7.9	4
Doxazosin_ZINC000094566092	1	-7.9	5
Revaprazan_ZINC000003633836	1	-7.9	3
Tioclomarol_ZINC000030691425	1	-7.9	6
Deserpidine_ZINC000257400372	1	-7.9	9
Etoposide_ZINC000011615745	1	-7.9	8
Solifenacin_ZINC000003936683	1	-7.9	3
Polydatin_ZINC000004098633	1	-7.9	11
Regadenoson_ZINC000013818943	1	-7.9	8
Calcipotriene_ZINC000100489836	1	-7.9	8
Cipemastat_ZINC000000600699	1	-7.9	8
Sembragiline_ZINC000013975983	1	-7.9	5
Sulindac_ZINC000012503133	1	-7.9	4
Glunicate_ZINC000004216419	1	-7.9	15
Olmesartan_ZINC000000538621	1	-7.9	9
Lopinavir_ZINC000110906785	1	-7.9	16
Yohimbic-acid_ZINC000003947439	1	-7.9	2
Tosufloxacin_ZINC000021983589	1	-7.9	4
Telotristat_ZINC000084758235	1	-7.9	11
Fenpiverinium_ZINC000000001439	1	-7.9	6
Trazodone_ZINC000000538483	1	-7.9	5
Carsatrin_ZINC000022851028	1	-7.9	9
Amibegron_ZINC000003797401	1	-7.9	10
Folic-acid_ZINC000008577218	1	-7.9	11
Halopemide_ZINC000000537818	1	-7.9	5
Toreforant_ZINC000043175812	1	-7.9	6
Medroxalol_ZINC000004213738	1	-7.9	10
Verucerfont_ZINC000034661169	1	-7.9	6
Bromerguride_ZINC000004215078	1	-7.9	3
Isocromil_ZINC000000001588	1	-7.9	4
Flutemazepam_ZINC000002005015	1	-7.9	2
Sodelglitazar_ZINC000001553281	1	-7.9	8
Axitirome_ZINC000001538134	1	-7.9	10
Delamanid_ZINC000043100810	1	-7.9	9
Temocaprilat_ZINC000004099102	1	-7.9	9
Presatovir_ZINC000205657764	1	-7.9	6
Lucitanib_ZINC000077024213	1	-7.9	8
Nelfinavir_ZINC000003833846	1	-7.9	12
Parcetasal_ZINC000000014940	1	-7.9	3
Etoposide-phosphate_ZINC000299754547	1	-7.9	9
Deferasirox_ZINC000001481815	1	-7.9	6
Flunoxaprofen_ZINC000000000319	1	-7.9	3
Metesind_ZINC000000537989	1	-7.9	6
Muraglitazar_ZINC000049650290	1	-7.9	12
Terbuficin_ZINC000004217528	1	-7.9	9
Aranotin_ZINC000004214877	1	-7.9	3
Bms-690514_ZINC000098091230	1	-7.9	7
Haloperidol_ZINC000000537822	1	-7.9	7
Teniposide_ZINC000201698152	1	-7.9	9
Flunitrazepam_ZINC000003812994	1	-7.9	2
Etoposide_ZINC000003830816	1	-7.9	8
Cinchophen_ZINC000000125047	1	-7.9	2
Deserpidine_ZINC000003830661	1	-7.8	9
Teniposide_ZINC000150652465	1	-7.8	9
Podilfen_ZINC000059299137	1	-7.8	4
Glucametacin_ZINC000077293064	1	-7.8	10
Azaftozine_ZINC000022462753	1	-7.8	4
Vardenafil_ZINC000018324776	1	-7.8	8
Fosinopril_ZINC000003977764	1	-7.8	15
Elziverine_ZINC000072266916	1	-7.8	10
Tetragastrin_ZINC000004256786	1	-7.8	17
Donepezil_ZINC000000897251	1	-7.8	6
Glicaramide_ZINC000004216401	1	-7.8	12
Ribociclib_ZINC000072316335	1	-7.8	5
Indacrinone_ZINC000000538575	1	-7.8	4
Clopipazan_ZINC000000001197	1	-7.8	0
Difluanine_ZINC000019364169	1	-7.8	10
Losmapimod_ZINC000035793138	1	-7.8	6
Sitogluside_ZINC000169313894	1	-7.8	13
Perlapine_ZINC000027303430	1	-7.8	1
Betrixaban_ZINC000030691754	1	-7.8	7
Ticagrelor_ZINC000077319512	1	-7.8	13
Azd-4769_ZINC000013888387	1	-7.8	11
Aripiprazole_ZINC000001851149	1	-7.8	7
Tak-441_ZINC000043207688	1	-7.8	11
Estriol_ZINC000003881360	1	-7.8	3
Teniposide_ZINC000150652469	1	-7.8	9
Teniposide_ZINC000003984009	1	-7.8	9
Abamectin-component-b1a_ZINC000248170378	1	-7.8	11
Hydroxyestrone_diacetate_ZINC000253492745	1	-7.8	4
Etoposide-phosphate_ZINC000245205034	1	-7.8	9
Eleclazine_ZINC000206191652	1	-7.8	5
Xipamide_ZINC000000538538	1	-7.8	4
Ajmaline_ZINC000014880007	1	-7.8	3
Dioxadrol_ZINC000003080605	1	-7.8	3
Fluquazone_ZINC000000001476	1	-7.8	3
Fenflumizole_ZINC000000608375	1	-7.8	5
Orteronel_ZINC000003943521	1	-7.8	3
Bms-754807_ZINC000043203317	1	-7.8	6
Imanixil_ZINC000000537853	1	-7.8	5
Xinidamine_ZINC000000002246	1	-7.8	3
Nufenoxole_ZINC000004217195	1	-7.8	6
Meribendan_ZINC000100378338	1	-7.8	2
Mobenzoxamine_ZINC000019361072	1	-7.8	12
Permethrin_ZINC000002032615	1	-7.8	7
Bretazenil_ZINC000000597316	1	-7.8	3
Levoprotiline_ZINC000001481890	1	-7.8	5
Mefloquine_ZINC000003874185	1	-7.8	5
Flubepride_ZINC000003604385	1	-7.8	8
Sitogluside_ZINC000085532584	1	-7.8	13
Methotrexate_ZINC000001529323	1	-7.8	11
Eluxadoline_ZINC000014210876	1	-7.8	12
Sarakalim_ZINC000000598479	1	-7.8	5
Teflutixol_ZINC000023358283	1	-7.8	8
Ziprasidone_ZINC000000538550	1	-7.8	4
Alvimopan_ZINC000000605670	1	-7.8	9
Uprifosbuvir_ZINC000149133266	1	-7.8	12
Lormetazepam_ZINC000000000432	1	-7.8	2
Lurosetron-mesylate_ZINC000000011481	1	-7.8	2
Mioflazine_ZINC000022851772	1	-7.8	10
Sb-742457_ZINC000043199965	1	-7.8	3
Perafensine_ZINC000033852266	1	-7.8	2
Azd3514_ZINC000101673084	1	-7.8	7
Yohimbic-acid_ZINC000005223909	1	-7.8	2
Trazolopride_ZINC000033940852	1	-7.8	5
Temazepam_ZINC000000000740	1	-7.8	2
Azd-4547_ZINC000095616598	1	-7.8	8
Idanpramine_ZINC000005733284	1	-7.8	7
Ipsalazide_ZINC000004216628	1	-7.8	8
Fuprazole_ZINC000022463197	1	-7.8	9
Lomerizine_ZINC000019362693	1	-7.8	8
Nrx195183_ZINC000001909562	1	-7.8	3
Iti-007_ZINC000137099035	1	-7.8	5
Zatosetron_ZINC000100093179	1	-7.8	2
Sulfaloxic-acid_ZINC000002020014	1	-7.8	7
Oxpheneridine_ZINC000005650539	1	-7.8	8
Traxanox_ZINC000000002203	1	-7.8	1
Talmapimod_ZINC000034001955	1	-7.8	5
Phthalylsulfacetamide_ZINC000000538163	1	-7.8	5
Taselisib_ZINC000068267049	1	-7.8	5
Sitogluside_ZINC000245190527	1	-7.8	13
Xenazoic-acid_ZINC000000608131	1	-7.8	8
Ralimetinib_ZINC000034630490	1	-7.8	6
Hesperidin_ZINC000104889096	1	-7.8	15
Nafiverine_ZINC000072266772	1	-7.8	12
Ketoconazole_ZINC000000643143	1	-7.8	7
Balaglitazone_ZINC000001489816	1	-7.8	5
Amlexanox_ZINC000000000928	1	-7.8	3
Lufuradom_ZINC000000607947	1	-7.8	4
Proroxan_ZINC000003087481	1	-7.8	5
Cyclocumarol_ZINC000002036736	1	-7.8	2
Docetaxel_ZINC000085537053	1	-7.8	17
Etoposide_ZINC000003830819	1	-7.8	8
Brivanib_ZINC000013684256	1	-7.8	6
Imiglitazar_ZINC000049756486	1	-7.8	11
Tacrolimus_ZINC000085537027	1	-7.8	10
Besonprodil_ZINC000027299440	1	-7.8	7
Saquinavir_ZINC000003914596	1	-7.8	14
Quinotolast_ZINC000000002018	1	-7.8	4
Iti-007_ZINC000116262036	1	-7.8	5
Prasterone_acetate_ZINC000039944340	1	-7.8	2
Spiperone_ZINC000000643233	1	-7.8	6
Piclozotan_ZINC000001892462	1	-7.8	6
ipragliflozin_ZINC000306122898	1	-7.8	8
Casokefamide_ZINC000072266935	1	-7.8	18
Afuresertib_ZINC000043197674	1	-7.8	7
Pki-166_ZINC000034032906	1	-7.8	5
Thiocolchicoside_ZINC000004245665	1	-7.8	11
Carburazepam_ZINC000000000123	1	-7.8	1
Phenazocine_ZINC000014952534	1	-7.8	4
Hepzidine_ZINC000001482083	1	-7.8	2
Belotecan_ZINC000003826691	1	-7.8	6
Teniposide_ZINC000004166028	1	-7.8	9
Butocrolol_ZINC000006069570	1	-7.8	7
Opanixil_ZINC000084758648	1	-7.8	6
Tetrazolast_ZINC000000004014	1	-7.8	1
Reclazepam_ZINC000000538279	1	-7.8	2
Tozasertib_ZINC000003820040	1	-7.8	7
Picumast_ZINC000019367677	1	-7.8	7
Pirodomast_ZINC000100369897	1	-7.8	3
Mirodenafil_ZINC000575440623	1	-7.8	12
Chlorthalidone_ZINC000000057255	1	-7.8	4
Clodoxopone_ZINC000004215401	1	-7.8	5
Niaprazine_ZINC000004213960	1	-7.8	6
Etoposide_ZINC000135672818	1	-7.8	8
Pirazolac_ZINC000000001957	1	-7.8	4
Aztreonam_ZINC000016958002	1	-7.8	8
Danitracen_ZINC000001481770	1	-7.8	1
Metolazone_ZINC000000601254	1	-7.8	3
Regadenoson_ZINC000090697750	1	-7.8	8
Osanetant_ZINC000003935475	1	-7.8	8
Raxatrigine_ZINC000034892269	1	-7.8	5
Aprepitant_ZINC000052245742	1	-7.8	8
Flunarizine_ZINC000019360739	1	-7.8	6
Etoposide_ZINC000043648995	1	-7.8	8
Transcainide_ZINC000095564686	1	-7.8	5
Amperozide_ZINC000004214849	1	-7.8	7
Micinicate_ZINC000013884306	1	-7.8	7
Olmesartan_medoxomil_ZINC000004149248	1	-7.8	12
Mimbane_ZINC000004213866	1	-7.8	0
Pemetrexed_ZINC000001851132	1	-7.8	10
Oxaflumazine_ZINC000022463271	1	-7.8	8
Temanogrel_ZINC000035920376	1	-7.8	8
Tioclomarol_ZINC000004214466	1	-7.8	6
Ronacaleret_ZINC000030691809	1	-7.8	12
Aprepitant_ZINC000097974568	1	-7.8	8
Lidoflazine_ZINC000022034381	1	-7.8	9
Cep-1347_ZINC000003928304	1	-7.8	11
Azd-2014_ZINC000059259287	1	-7.8	6
Iloperidone_ZINC000001548097	1	-7.8	8
Pomisartan_ZINC000150340377	1	-7.8	6
Glisamuride_ZINC000000537797	1	-7.8	7
Itraconazole_ZINC000003830973	1	-7.8	11
Icopezil-maleate_ZINC000000537848	1	-7.8	5
Osi-930_ZINC000003962535	1	-7.8	7
Udenafil_ZINC000013916432	1	-7.8	11
Cyclocumarol_ZINC000004212731	1	-7.8	2
Rg-7603_ZINC000117249555	1	-7.8	5
Apafant_ZINC000000608180	1	-7.8	4
Mevastatin_ZINC000003833876	1	-7.8	8
Bi-2536_ZINC000035851315	1	-7.8	7
Mk-5108_ZINC000073069245	1	-7.8	7
Lobuprofen_ZINC000004213673	1	-7.8	9
Calcipotriene_ZINC000033938184	1	-7.8	8
Methysergide_ZINC000053151228	1	-7.8	5
Mk-5108_ZINC000252670601	1	-7.8	7
Clazolam_ZINC000037246129	1	-7.8	0
Hydromorphinol_ZINC000004216508	1	-7.8	3
Piriqualone_ZINC000004217322	1	-7.8	3
Lopinavir_ZINC000028525391	1	-7.8	16
Carpipramine_ZINC000000597537	1	-7.8	6
Nicofurate_ZINC000072266769	1	-7.8	18
Gsk189254_ZINC000003961799	1	-7.8	4
Rebamipide_ZINC000009330879	1	-7.8	5
Polydatin_ZINC000096032072	1	-7.8	11
Indopine_ZINC000001482088	1	-7.8	6
Intrazole_ZINC000000001573	1	-7.8	3
Ramatroban_ZINC000003798772	1	-7.8	6
Silmitasertib_ZINC000058638454	1	-7.8	3
Morazone_ZINC000031982610	1	-7.8	4
Lodiperone_ZINC000053149862	1	-7.8	6
Zstk-474_ZINC000100683574	1	-7.8	1
Lisuride_ZINC000003831001	1	-7.8	3
Benoxaprofen_ZINC000000000070	1	-7.8	3
Capromorelin_ZINC000011678032	1	-7.8	10
Lobeline_ZINC000000001624	1	-7.8	7
Azd2066_ZINC000034885049	1	-7.8	5
Sildenafil_ZINC000019796168	1	-7.7	7
Fradafiban_ZINC000003789797	1	-7.7	8
Propisergide_ZINC000033858308	1	-7.7	4
Deserpidine_ZINC000003830662	1	-7.7	9
Pipofezine_ZINC000000050247	1	-7.7	1
Bedaquiline_ZINC000004655029	1	-7.7	9
Jnj-42756493_ZINC000168520308	1	-7.7	9
Terconazole_ZINC000003873936	1	-7.7	8
Tisocromide_ZINC000002019916	1	-7.7	7
Teniposide_ZINC000150674146	1	-7.7	9
Volixibat_ZINC000164888446	1	-7.7	17
Etoposide-phosphate_ZINC000245205036	1	-7.7	9
Diosmetin_ZINC000005733652	1	-7.7	4
Lifibrol_ZINC000001997397	1	-7.7	9
Niraparib_ZINC000043206370	1	-7.7	3
Vedaprofen_ZINC000000000828	1	-7.7	3
Spirendolol_ZINC000000000722	1	-7.7	7
Tezosentan_ZINC000003954692	1	-7.7	13
Senicapoc_ZINC000003816408	1	-7.7	4
Elbanizine_ZINC000031561759	1	-7.7	8
Azd-8055_ZINC000115586131	1	-7.7	6
Neocinchophen_ZINC000000001791	1	-7.7	4
Nonabine_ZINC000005315490	1	-7.7	8
Adosopine_ZINC000000012519	1	-7.7	1
Bimatoprost_ZINC000003994921	1	-7.7	15
Terflavoxate_ZINC000000538430	1	-7.7	6
Ertiprotafib_ZINC000001547338	1	-7.7	6
Revaprazan_ZINC000003633835	1	-7.7	3
Exisulind_ZINC000012341529	1	-7.7	4
Egualen_ZINC000002016044	1	-7.7	3
Bifonazole_ZINC000003812958	1	-7.7	4
Tropodifene_ZINC000100376956	1	-7.7	8
Succinobucol_ZINC000003937467	1	-7.7	14
Idelalisib_ZINC000013986658	1	-7.7	5
Prasterone_acetate_ZINC000001057676	1	-7.7	2
Gantofiban_ZINC000022447381	1	-7.7	10
Repirinast_ZINC000000538285	1	-7.7	5
Balofloxacin_ZINC000004654976	1	-7.7	5
Lemborexant_ZINC000209650622	1	-7.7	6
Troquidazole_ZINC000005422165	1	-7.7	1
Nitraquazone_ZINC000000001819	1	-7.7	3
Oxatomide_ZINC000019632896	1	-7.7	7
Flurantel_ZINC000000537751	1	-7.7	9
Teniposide_ZINC000204007294	1	-7.7	9
Prasterone_acetate_ZINC000253500719	1	-7.7	2
Antrafenine_ZINC000053073961	1	-7.7	10
Sitagliptin_ZINC000001489478	1	-7.7	6
Bioresmethrin_ZINC000000900673	1	-7.7	7
Cebaracetam_ZINC000001533476	1	-7.7	3
Lefradafiban_ZINC000027093989	1	-7.7	10
Triflumidate_ZINC000002014836	1	-7.7	7
Glucametacin_ZINC000110343950	1	-7.7	10
Bimatoprost_ZINC000045789177	1	-7.7	15
Maxacalcitol_ZINC000004474617	1	-7.7	9
Quilostigmine_ZINC000056897587	1	-7.7	2
Eniclobrate_ZINC000001573374	1	-7.7	9
Flutrimazole_ZINC000003799012	1	-7.7	4
Alvocidib_ZINC000021288966	1	-7.7	4
Lovastatin_ZINC000003831011	1	-7.7	8
Pf-03758309_ZINC000222637955	1	-7.7	6
Yohimbic-acid_ZINC000009214629	1	-7.7	2
Guadecitabine_ZINC000257351737	1	-7.7	13
Lopinavir_ZINC000011616287	1	-7.7	16
Lopinavir_ZINC000043773445	1	-7.7	16
Vemurafenib_ZINC000052509366	1	-7.7	7
Vaneprim_ZINC000003604326	1	-7.7	13
Regadenoson_ZINC000065748602	1	-7.7	8
Alvimopan_ZINC000003782341	1	-7.7	9
Alfatradiol_ZINC000004521752	1	-7.7	2
Tibezonium_ZINC000111364754	1	-7.7	9
Benzpiperylon_ZINC000000001019	1	-7.7	4
Oxmetidine_ZINC000008144601	1	-7.7	8
Mapracorat_ZINC000035952535	1	-7.7	8
Avanafil_ZINC000011677857	1	-7.7	10
Hydroxyestrone_diacetate_ZINC000005228512	1	-7.7	4
Morphine_ZINC000003628643	1	-7.7	2
Ipsapirone_ZINC000001999529	1	-7.7	6
Pirodavir_ZINC000000538202	1	-7.7	8
Lovastatin_ZINC000008681777	1	-7.7	8
Lemborexant_ZINC000209650650	1	-7.7	6
Tolpadol_ZINC000031297954	1	-7.7	7
Bexagliflozin_ZINC000108646769	1	-7.7	13
Sitogluside_ZINC000245190528	1	-7.7	13
Mitiglinide_ZINC000001482913	1	-7.7	5
Mazokalim_ZINC000003916953	1	-7.7	10
Trabodenoson_ZINC000642805870	1	-7.7	8
Zofenopril_ZINC000003775162	1	-7.7	8
Trazitiline_ZINC000022463350	1	-7.7	1
Bms-911543_ZINC000100468481	1	-7.7	6
Glicetanile_ZINC000000607915	1	-7.7	9
Crizotinib_ZINC000035902489	1	-7.7	6
Flucetorex_ZINC000072266847	1	-7.7	8
Alinastine_ZINC000003800366	1	-7.7	9
Cilazaprilat_ZINC000004212489	1	-7.7	7
Trefentanil_ZINC000000538484	1	-7.7	8
Triciribine-phosphate_ZINC000005385245	1	-7.7	7
Fluorescein_ZINC000003872582	1	-7.7	2
Bimatoprost_ZINC000011676867	1	-7.7	15
Flavodic_acid_ZINC000004073414	1	-7.7	7

## Sheet: NP-lib
Compound	Model ID	Energy	nRot
MolPort-001-742-110_ZINC000043552589	1	-10.3	8		Drugs with Energy -9 and above are highlighted in Blue
MolPort-039-052-621_ZINC000044404209	1	-10.1	9
MolPort-039-338-696_ZINC000299817665	1	-10	14
MolPort-001-742-110_ZINC000059779788	1	-9.9	8
MolPort-035-705-955_ZINC000003594862	1	-9.6	8
MolPort-005-909-605_ZINC000036368151	1	-9.4	2
MolPort-020-005-943_ZINC000031350059	1	-9.4	2
MolPort-027-836-471_ZINC000242547689	1	-9.3	11
MolPort-005-909-605_ZINC000253388536	1	-9.3	2
MolPort-019-936-878_ZINC000253390006	1	-9.3	15
MolPort-000-741-311_ZINC000253502228	1	-9.3	13
MolPort-002-535-283_ZINC000253499148	1	-9.2	13
MolPort-001-740-100_ZINC000000603253	1	-9.2	0
MolPort-039-141-993_ZINC000015205931	1	-9.2	8
MolPort-002-535-283_ZINC000253499146	1	-9.2	13
MolPort-002-507-280_ZINC000012890906	1	-9.1	2
MolPort-044-183-452_ZINC000101104515	1	-9.1	3
MolPort-002-535-283_ZINC000253499147	1	-9.1	13
MolPort-027-835-585_ZINC000004027386	1	-9.1	1
MolPort-035-706-482_ZINC000014766825	1	-9.1	2
MolPort-002-526-280_ZINC000253498755	1	-9	2
MolPort-001-741-064_ZINC000067902988	1	-9	13
MolPort-019-936-959_ZINC000253389930	1	-9	16
MolPort-002-526-280_ZINC000085576447	1	-9	2
MolPort-039-141-993_ZINC000015205928	1	-9	8
MolPort-039-052-311_ZINC000245205019	1	-9	14
MolPort-001-740-946_ZINC000004654620	1	-9	10
MolPort-005-909-605_ZINC000253388537	1	-9	2
MolPort-002-527-314_ZINC000004082225	1	-9	1
MolPort-002-532-754_ZINC000245224268	1	-9	21
MolPort-001-768-161_ZINC000001690209	1	-9	1
MolPort-035-706-502_ZINC000049872145	1	-9	3
MolPort-002-535-283_ZINC000253499149	1	-9	13
MolPort-007-980-750_ZINC000253530469	1	-8.9	19
MolPort-039-338-463_ZINC000238774071	1	-8.9	2
MolPort-000-778-336_ZINC000253503172	1	-8.9	15
MolPort-019-936-959_ZINC000253389929	1	-8.9	16
MolPort-039-338-757_ZINC000299817804	1	-8.9	15
MolPort-028-754-125_ZINC000008829452	1	-8.9	1
MolPort-000-763-719_ZINC000253504516	1	-8.9	17
MolPort-006-394-715_ZINC000238808778	1	-8.8	11
MolPort-019-936-878_ZINC000253390010	1	-8.8	15
MolPort-002-507-280_ZINC000004273370	1	-8.8	2
MolPort-002-507-280_ZINC000003941105	1	-8.8	2
MolPort-020-005-756_ZINC000031459237	1	-8.8	1
MolPort-007-980-750_ZINC000253530471	1	-8.8	19
MolPort-005-944-748_ZINC000253389367	1	-8.8	9
MolPort-000-761-272_ZINC000257360791	1	-8.8	22
MolPort-002-512-098_ZINC000038140889	1	-8.8	4
MolPort-004-955-852_ZINC000004097188	1	-8.7	1
MolPort-000-778-336_ZINC000253503175	1	-8.7	15
MolPort-000-727-394_ZINC000254302320	1	-8.7	17
MolPort-001-740-780_ZINC000004096258	1	-8.7	11
MolPort-028-599-893_ZINC000096023620	1	-8.7	12
MolPort-000-741-311_ZINC000253502231	1	-8.7	13
MolPort-002-527-314_ZINC000004082224	1	-8.7	1
MolPort-000-778-336_ZINC000253503169	1	-8.7	15
MolPort-000-778-336_ZINC000003947429	1	-8.7	15
MolPort-019-936-878_ZINC000253390009	1	-8.7	15
MolPort-001-741-064_ZINC000049781954	1	-8.7	13
MolPort-002-510-946_ZINC000038140884	1	-8.6	2
MolPort-044-183-386_ZINC000100306588	1	-8.6	5
MolPort-000-761-272_ZINC000257360792	1	-8.6	22
MolPort-002-524-598_ZINC000070691533	1	-8.6	16
MolPort-000-775-997_ZINC000072169036	1	-8.6	14
MolPort-000-778-336_ZINC000003947428	1	-8.6	15
MolPort-019-936-902_ZINC000049841244	1	-8.6	15
MolPort-001-740-524_ZINC000253500934	1	-8.6	16
MolPort-002-526-280_ZINC000253498754	1	-8.6	2
MolPort-039-338-408_ZINC000042835388	1	-8.6	6
MolPort-035-706-317_ZINC000032024272	1	-8.6	2
MolPort-002-507-186_ZINC000118913600	1	-8.6	1
MolPort-005-909-605_ZINC000253388535	1	-8.6	2
MolPort-000-763-719_ZINC000253504510	1	-8.6	17
MolPort-001-741-827_ZINC000067903629	1	-8.6	13
MolPort-007-980-750_ZINC000253530472	1	-8.6	19
MolPort-001-741-064_ZINC000253389264	1	-8.6	13
MolPort-002-524-807_ZINC000008951991	1	-8.6	3
MolPort-002-512-098_ZINC000038140890	1	-8.6	4
MolPort-019-936-878_ZINC000253390008	1	-8.5	15
MolPort-001-741-386_ZINC000035456370	1	-8.5	3
MolPort-002-512-098_ZINC000038140888	1	-8.5	4
MolPort-002-524-598_ZINC000070691538	1	-8.5	16
MolPort-007-980-750_ZINC000253530470	1	-8.5	19
MolPort-000-775-997_ZINC000008143604	1	-8.5	14
MolPort-001-740-100_ZINC000037538575	1	-8.5	0
MolPort-001-740-678_ZINC000004349592	1	-8.5	12
MolPort-001-742-460_ZINC000038139805	1	-8.5	8
MolPort-002-507-280_ZINC000012890900	1	-8.5	2
MolPort-001-740-591_ZINC000033832448	1	-8.5	12
MolPort-020-005-773_ZINC000238809538	1	-8.5	16
MolPort-039-338-835_ZINC000013548872	1	-8.5	6
MolPort-001-742-097_ZINC000253500837	1	-8.5	18
MolPort-000-733-658_ZINC000079183226	1	-8.5	15
MolPort-000-778-336_ZINC000003947430	1	-8.5	15
MolPort-028-610-189_ZINC000096111561	1	-8.4	6
MolPort-002-524-598_ZINC000070691536	1	-8.4	16
MolPort-000-727-394_ZINC000254302319	1	-8.4	17
MolPort-001-742-502_ZINC000248008261	1	-8.4	4
MolPort-035-706-421_ZINC000100060215	1	-8.4	8
MolPort-039-052-485_ZINC000061948698	1	-8.4	8
MolPort-042-675-382_ZINC000013485410	1	-8.4	6
MolPort-019-992-917_ZINC000006067010	1	-8.4	1
MolPort-019-936-959_ZINC000253389931	1	-8.4	16
MolPort-002-512-098_ZINC000038140891	1	-8.4	4
MolPort-000-778-336_ZINC000003947427	1	-8.4	15
MolPort-002-507-418_ZINC000003881959	1	-8.4	11
MolPort-039-338-867_ZINC000299817465	1	-8.4	26
MolPort-001-812-855_ZINC000253498822	1	-8.4	2
MolPort-001-742-460_ZINC000038139804	1	-8.4	8
MolPort-000-763-719_ZINC000253504517	1	-8.4	17
MolPort-039-337-124_ZINC000013374707	1	-8.4	7
MolPort-000-761-272_ZINC000257360794	1	-8.4	22
MolPort-039-338-394_ZINC000137376946	1	-8.4	2
MolPort-035-706-288_ZINC000043620416	1	-8.4	7
MolPort-035-706-538_ZINC000039014143	1	-8.4	3
MolPort-002-508-597_ZINC000004023302	1	-8.4	2
MolPort-002-510-946_ZINC000038140885	1	-8.4	2
MolPort-002-507-280_ZINC000004273372	1	-8.3	2
MolPort-001-812-855_ZINC000253498824	1	-8.3	2
MolPort-020-005-907_ZINC000049888788	1	-8.3	13
MolPort-039-052-574_ZINC000031165745	1	-8.3	6
MolPort-002-045-697_ZINC000006665108	1	-8.3	7
MolPort-000-124-380_ZINC000004478067	1	-8.3	5
MolPort-001-741-689_ZINC000028537536	1	-8.3	10
MolPort-042-675-206_ZINC000014824336	1	-8.3	2
MolPort-039-338-860_ZINC000299817767	1	-8.3	21
MolPort-001-742-502_ZINC000248008265	1	-8.3	4
MolPort-006-394-715_ZINC000252286706	1	-8.3	11
MolPort-009-019-334_ZINC000064859315	1	-8.3	14
MolPort-000-741-311_ZINC000253502229	1	-8.3	13
MolPort-002-507-280_ZINC000004273373	1	-8.3	2
MolPort-035-706-302_ZINC000085539966	1	-8.3	12
MolPort-039-052-247_ZINC000238809247	1	-8.3	23
MolPort-001-741-064_ZINC000253389263	1	-8.3	13
MolPort-005-944-619_ZINC000013383651	1	-8.3	3
MolPort-019-937-414_ZINC000014637754	1	-8.3	4
MolPort-006-668-465_ZINC000005158566	1	-8.3	8
MolPort-002-526-280_ZINC000253498753	1	-8.3	2
MolPort-001-742-267_ZINC000095785874	1	-8.3	16
MolPort-001-741-386_ZINC000026472270	1	-8.3	3
MolPort-006-668-644_ZINC000105426804	1	-8.3	8
MolPort-000-714-792_ZINC000252441409	1	-8.3	22
MolPort-000-763-719_ZINC000253504507	1	-8.3	17
MolPort-020-005-873_ZINC000238809427	1	-8.3	25
MolPort-005-909-337_ZINC000169717638	1	-8.3	15
MolPort-000-775-583_ZINC000253506247	1	-8.3	12
MolPort-002-524-598_ZINC000059816865	1	-8.3	16
MolPort-038-386-705_ZINC000253534710	1	-8.3	4
MolPort-001-740-591_ZINC000031156316	1	-8.3	12
MolPort-001-741-689_ZINC000028537532	1	-8.3	10
MolPort-019-937-078_ZINC000008829484	1	-8.3	3
MolPort-006-668-644_ZINC000031170081	1	-8.2	8
MolPort-000-778-336_ZINC000011615762	1	-8.2	15
MolPort-005-945-631_ZINC000013485422	1	-8.2	6
MolPort-001-739-485_ZINC000031158807	1	-8.2	3
MolPort-035-706-514_ZINC000049872304	1	-8.2	4
MolPort-035-706-504_ZINC000049823049	1	-8.2	15
MolPort-003-908-087_ZINC000001637085	1	-8.2	5
MolPort-001-741-269_ZINC000003872147	1	-8.2	3
MolPort-000-761-272_ZINC000257360793	1	-8.2	22
MolPort-042-675-206_ZINC000014824334	1	-8.2	2
MolPort-000-704-745_ZINC000003861133	1	-8.2	2
MolPort-000-727-394_ZINC000254302317	1	-8.2	17
MolPort-005-944-881_ZINC000042875583	1	-8.2	4
MolPort-002-508-597_ZINC000004023301	1	-8.2	2
MolPort-000-704-745_ZINC000005512980	1	-8.2	2
MolPort-001-742-097_ZINC000253500840	1	-8.2	18
MolPort-039-052-485_ZINC000096023661	1	-8.2	8
MolPort-001-736-557_ZINC000005447704	1	-8.2	5
MolPort-000-778-336_ZINC000011615759	1	-8.2	15
MolPort-028-599-901_ZINC000004097817	1	-8.2	6
MolPort-028-754-114_ZINC000004349417	1	-8.2	14
MolPort-002-507-280_ZINC000004273371	1	-8.2	2
MolPort-019-936-959_ZINC000253389928	1	-8.2	16
MolPort-001-740-345_ZINC000004654812	1	-8.2	14
MolPort-000-727-394_ZINC000254302318	1	-8.2	17
MolPort-039-338-299_ZINC000299817781	1	-8.2	3
MolPort-005-944-956_ZINC000002554900	1	-8.1	5
MolPort-039-338-709_ZINC000299817890	1	-8.1	5
MolPort-002-527-077_ZINC000004082125	1	-8.1	7
MolPort-028-754-122_ZINC000027103414	1	-8.1	7
MolPort-003-983-881_ZINC000004517149	1	-8.1	5
MolPort-002-507-280_ZINC000003978827	1	-8.1	2
MolPort-001-740-194_ZINC000004349478	1	-8.1	14
MolPort-005-944-685_ZINC000005195795	1	-8.1	5
MolPort-035-706-325_ZINC000096023811	1	-8.1	3
MolPort-005-944-743_ZINC000230017540	1	-8.1	3
MolPort-002-515-798_ZINC000002121517	1	-8.1	5
MolPort-000-757-044_ZINC000253530363	1	-8.1	30
MolPort-003-892-645_ZINC000004097713	1	-8.1	1
MolPort-020-005-873_ZINC000238809428	1	-8.1	25
MolPort-005-945-631_ZINC000013485421	1	-8.1	6
MolPort-019-937-078_ZINC000067912742	1	-8.1	3
MolPort-001-741-269_ZINC000000608133	1	-8.1	3
MolPort-001-742-227_ZINC000146803900	1	-8.1	9
MolPort-016-633-328_ZINC000245240534	1	-8.1	23
MolPort-019-936-742_ZINC000253390079	1	-8.1	18
MolPort-000-778-336_ZINC000011615757	1	-8.1	15
MolPort-039-052-287_ZINC000252483567	1	-8.1	19
MolPort-005-944-881_ZINC000067910656	1	-8.1	4
MolPort-005-944-743_ZINC000014928870	1	-8.1	3
MolPort-038-386-705_ZINC000253534711	1	-8.1	4
MolPort-002-507-418_ZINC000003881962	1	-8.1	11
MolPort-001-741-965_ZINC000000538127	1	-8.1	5
MolPort-001-741-269_ZINC000002573069	1	-8.1	3
MolPort-001-740-346_ZINC000004102435	1	-8.1	10
MolPort-002-508-597_ZINC000004023304	1	-8.1	2
MolPort-027-853-583_ZINC000248089500	1	-8.1	7
MolPort-019-936-742_ZINC000253390080	1	-8.1	18
MolPort-003-666-518_ZINC000169289411	1	-8.1	10
MolPort-002-524-807_ZINC000004716552	1	-8.1	3
MolPort-039-339-240_ZINC000031459294	1	-8.1	9
MolPort-001-741-121_ZINC000013302315	1	-8	2
MolPort-001-742-519_ZINC000000119434	1	-8	0
MolPort-000-741-311_ZINC000253502230	1	-8	13
MolPort-020-005-776_ZINC000028968101	1	-8	15
MolPort-003-850-876_ZINC000008220175	1	-8	15
MolPort-039-338-835_ZINC000255231862	1	-8	6
MolPort-027-948-174_ZINC000252477565	1	-8	2
MolPort-039-338-489_ZINC000299817554	1	-8	6
MolPort-001-812-855_ZINC000253498823	1	-8	2
MolPort-019-937-436_ZINC000005158973	1	-8	6
MolPort-002-507-418_ZINC000012888727	1	-8	11
MolPort-001-742-227_ZINC000070454025	1	-8	9
MolPort-002-507-418_ZINC000012888734	1	-8	11
MolPort-000-778-336_ZINC000253503170	1	-8	15
MolPort-001-785-959_ZINC000006845076	1	-8	13
MolPort-001-740-387_ZINC000105153378	1	-8	15
MolPort-038-386-705_ZINC000253534709	1	-8	4
MolPort-001-741-121_ZINC000013302310	1	-8	2
MolPort-023-300-019_ZINC000252517499	1	-8	2
MolPort-002-507-418_ZINC000003881960	1	-8	11
MolPort-039-338-404_ZINC000136914527	1	-8	5
MolPort-042-675-261_ZINC000138700005	1	-8	6
MolPort-002-911-113_ZINC000253497992	1	-8	7
MolPort-001-812-855_ZINC000253498821	1	-8	2
MolPort-002-476-943_ZINC000001562130	1	-8	0
MolPort-005-944-881_ZINC000253390031	1	-8	4
MolPort-035-706-507_ZINC000096023899	1	-8	5
MolPort-005-945-631_ZINC000013485420	1	-8	6
MolPort-005-944-748_ZINC000253389368	1	-8	9
MolPort-039-338-740_ZINC000059729955	1	-8	8
MolPort-000-778-336_ZINC000011615761	1	-8	15
MolPort-002-507-418_ZINC000003881961	1	-8	11
MolPort-019-937-078_ZINC000067912745	1	-8	3
MolPort-039-339-112_ZINC000004777669	1	-8	2
MolPort-039-339-028_ZINC000095099608	1	-8	15
MolPort-039-338-719_ZINC000005158921	1	-7.9	9
MolPort-002-507-418_ZINC000012888720	1	-7.9	11
MolPort-002-801-687_ZINC000001022034	1	-7.9	1
MolPort-028-610-189_ZINC000096111560	1	-7.9	6
MolPort-042-675-261_ZINC000138700111	1	-7.9	6
MolPort-001-741-463_ZINC000067903362	1	-7.9	11
MolPort-002-507-418_ZINC000012888715	1	-7.9	11
MolPort-023-220-417_ZINC000008221225	1	-7.9	15
MolPort-001-741-496_ZINC000000086467	1	-7.9	2
MolPort-039-339-112_ZINC000004098804	1	-7.9	2
MolPort-002-321-150_ZINC000003157052	1	-7.9	1
MolPort-001-741-269_ZINC000001280038	1	-7.9	3
MolPort-023-276-329_ZINC000098052524	1	-7.9	5
MolPort-000-704-745_ZINC000003861134	1	-7.9	2
MolPort-019-937-060_ZINC000067912696	1	-7.9	6
MolPort-000-707-678_ZINC000003875408	1	-7.9	14
MolPort-000-775-583_ZINC000253506262	1	-7.9	12
MolPort-003-911-498_ZINC000253497609	1	-7.9	5
MolPort-035-706-470_ZINC000013411981	1	-7.9	8
MolPort-019-937-210_ZINC000005722186	1	-7.9	9
MolPort-039-145-101_ZINC000390822361	1	-7.9	16
MolPort-002-524-725_ZINC000070691554	1	-7.9	9
MolPort-001-740-524_ZINC000253500936	1	-7.9	16
MolPort-039-338-868_ZINC000299817840	1	-7.9	21
MolPort-006-668-378_ZINC000253529984	1	-7.9	16
MolPort-019-937-145_ZINC000049601560	1	-7.9	11
MolPort-002-525-357_ZINC000070691661	1	-7.9	4
MolPort-000-726-918_ZINC000004731298	1	-7.9	3
MolPort-039-145-101_ZINC000390822360	1	-7.9	16
MolPort-019-937-067_ZINC000106007458	1	-7.9	7
MolPort-003-983-881_ZINC000058576036	1	-7.9	5
MolPort-039-338-553_ZINC000014727561	1	-7.9	9
MolPort-002-525-553_ZINC000038563738	1	-7.8	2
MolPort-000-707-678_ZINC000004252704	1	-7.8	14
MolPort-001-789-441_ZINC000002504804	1	-7.8	9
MolPort-005-944-881_ZINC000253390032	1	-7.8	4
MolPort-002-515-798_ZINC000002121515	1	-7.8	5
MolPort-002-911-085_ZINC000253497711	1	-7.8	4
MolPort-002-507-418_ZINC000142857948	1	-7.8	11
MolPort-001-779-935_ZINC000004262223	1	-7.8	6
MolPort-021-804-526_ZINC000225257462	1	-7.8	8
MolPort-000-726-918_ZINC000253617029	1	-7.8	3
MolPort-028-610-075_ZINC000253534341	1	-7.8	15
MolPort-027-720-908_ZINC000049889356	1	-7.8	15
MolPort-035-706-344_ZINC000034012896	1	-7.8	6
MolPort-005-945-631_ZINC000013485423	1	-7.8	6
MolPort-039-052-455_ZINC000096023629	1	-7.8	8
MolPort-000-704-745_ZINC000005512974	1	-7.8	2
MolPort-002-523-817_ZINC000008918450	1	-7.8	5
MolPort-001-740-170_ZINC000253388709	1	-7.8	15
MolPort-019-879-478_ZINC000085539971	1	-7.8	15
MolPort-001-741-269_ZINC000003643476	1	-7.8	3
MolPort-001-832-299_ZINC000013509425	1	-7.8	1
MolPort-005-944-748_ZINC000067903504	1	-7.8	9
MolPort-001-740-591_ZINC000031156322	1	-7.8	12
MolPort-001-741-121_ZINC000075906045	1	-7.8	2
MolPort-028-610-187_ZINC000015121009	1	-7.8	9
MolPort-001-832-299_ZINC000004521756	1	-7.8	1
MolPort-019-936-788_ZINC000067913644	1	-7.8	20
MolPort-035-705-727_ZINC000034612334	1	-7.8	2
MolPort-020-005-736_ZINC000004098747	1	-7.8	11
MolPort-002-911-087_ZINC000253497718	1	-7.8	3
MolPort-002-325-565_ZINC000239073255	1	-7.8	16
MolPort-002-525-357_ZINC000070691657	1	-7.8	4
MolPort-039-052-631_ZINC000005849312	1	-7.8	6
MolPort-001-740-300_ZINC000014688352	1	-7.8	4
MolPort-039-052-538_ZINC000038469524	1	-7.8	10
MolPort-002-525-357_ZINC000070691659	1	-7.8	4
MolPort-003-983-881_ZINC000150447412	1	-7.8	5
MolPort-027-948-174_ZINC000252477566	1	-7.8	2
MolPort-019-936-790_ZINC000067913655	1	-7.8	14
MolPort-003-908-087_ZINC000013816219	1	-7.8	5
MolPort-000-757-044_ZINC000253530362	1	-7.8	30
MolPort-042-675-458_ZINC000136358131	1	-7.8	17
MolPort-002-176-718_ZINC000253499203	1	-7.8	5
MolPort-039-052-450_ZINC000004404409	1	-7.7	5
MolPort-038-386-575_ZINC000252516940	1	-7.7	5
MolPort-039-339-014_ZINC000001643072	1	-7.7	11
MolPort-001-832-299_ZINC000003869900	1	-7.7	1
MolPort-027-853-583_ZINC000049601451	1	-7.7	7
MolPort-000-757-044_ZINC000253530364	1	-7.7	30
MolPort-027-948-174_ZINC000252477564	1	-7.7	2
MolPort-001-740-170_ZINC000253388708	1	-7.7	15
MolPort-021-804-567_ZINC000229775449	1	-7.7	5
MolPort-019-937-060_ZINC000067912695	1	-7.7	6
MolPort-002-911-104_ZINC000253497997	1	-7.7	8
MolPort-005-944-988_ZINC000059402085	1	-7.7	14
MolPort-020-005-924_ZINC000100037386	1	-7.7	6
MolPort-002-506-898_ZINC000003881360	1	-7.7	3
MolPort-006-668-378_ZINC000253529985	1	-7.7	16
MolPort-001-797-985_ZINC000000000052	1	-7.7	3
MolPort-019-937-078_ZINC000014980286	1	-7.7	3
MolPort-028-610-062_ZINC000059770263	1	-7.7	13
MolPort-000-714-792_ZINC000252441407	1	-7.7	22
MolPort-007-980-809_ZINC000238731755	1	-7.7	11
MolPort-042-675-206_ZINC000014824332	1	-7.7	2
MolPort-019-937-090_ZINC000049181130	1	-7.7	4
MolPort-001-742-097_ZINC000253500838	1	-7.7	18
MolPort-039-101-336_ZINC000015449154	1	-7.7	4
MolPort-001-740-591_ZINC000033832446	1	-7.7	12
MolPort-000-124-380_ZINC000004478069	1	-7.7	5
MolPort-035-705-652_ZINC000096023666	1	-7.7	3
MolPort-019-939-250_ZINC000169721061	1	-7.7	22
MolPort-001-779-935_ZINC000016889922	1	-7.7	6
MolPort-019-936-742_ZINC000253390081	1	-7.7	18
MolPort-001-742-605_ZINC000053195720	1	-7.7	2
MolPort-039-339-001_ZINC000003873159	1	-7.7	8
MolPort-001-740-540_ZINC000004098934	1	-7.7	14
MolPort-021-804-747_ZINC000034319583	1	-7.7	2
MolPort-042-675-458_ZINC000136358084	1	-7.7	17
MolPort-001-740-852_ZINC000004097893	1	-7.7	2
MolPort-001-835-659_ZINC000001562070	1	-7.7	1
MolPort-001-740-357_ZINC000013374324	1	-7.7	11
MolPort-019-936-790_ZINC000067913664	1	-7.7	14
MolPort-023-299-052_ZINC000014819752	1	-7.7	5
MolPort-001-779-935_ZINC000253537578	1	-7.7	6
MolPort-035-706-331_ZINC000096023790	1	-7.7	6
MolPort-019-737-268_ZINC000253531476	1	-7.7	7
MolPort-005-945-621_ZINC000003649911	1	-7.7	4
MolPort-002-508-597_ZINC000004023303	1	-7.7	2
MolPort-039-337-124_ZINC000013374706	1	-7.7	7
MolPort-005-981-187_ZINC000000006256	1	-7.7	0
MolPort-002-521-697_ZINC000000490967	1	-7.7	6
MolPort-001-742-543_ZINC000001615344	1	-7.7	8
MolPort-019-737-268_ZINC000253531474	1	-7.7	7
MolPort-001-739-671_ZINC000031160738	1	-7.7	2
MolPort-005-944-621_ZINC000031155650	1	-7.6	14
MolPort-001-779-935_ZINC000004404494	1	-7.6	6
MolPort-001-740-163_ZINC000015274352	1	-7.6	3
MolPort-042-624-483_ZINC000005158963	1	-7.6	6
MolPort-020-005-863_ZINC000238809330	1	-7.6	12
MolPort-000-882-121_ZINC000004175638	1	-7.6	9
MolPort-001-740-357_ZINC000013374323	1	-7.6	11
MolPort-005-944-957_ZINC000026977303	1	-7.6	10
MolPort-001-832-299_ZINC000003869898	1	-7.6	1
MolPort-002-911-113_ZINC000253497994	1	-7.6	7
MolPort-023-299-051_ZINC000014819753	1	-7.6	5
MolPort-002-911-087_ZINC000253497719	1	-7.6	3
MolPort-038-386-705_ZINC000253534708	1	-7.6	4
MolPort-044-561-186_ZINC000004097876	1	-7.6	3
MolPort-021-804-567_ZINC000106939114	1	-7.6	5
MolPort-001-742-402_ZINC000015165008	1	-7.6	5
MolPort-001-832-299_ZINC000003977995	1	-7.6	1
MolPort-001-832-299_ZINC000005356864	1	-7.6	1
MolPort-007-980-809_ZINC000253530726	1	-7.6	11
MolPort-002-525-357_ZINC000070691648	1	-7.6	4
MolPort-001-742-227_ZINC000005838160	1	-7.6	9
MolPort-002-523-817_ZINC000008918451	1	-7.6	5
MolPort-002-176-718_ZINC000043763825	1	-7.6	5
MolPort-020-005-924_ZINC000100037380	1	-7.6	6
MolPort-042-675-206_ZINC000014824338	1	-7.6	2
MolPort-028-754-172_ZINC000040394781	1	-7.6	3
MolPort-006-668-644_ZINC000035271669	1	-7.6	8
MolPort-035-706-468_ZINC000013412021	1	-7.6	5
MolPort-001-740-357_ZINC000013374322	1	-7.6	11
MolPort-023-300-019_ZINC000252517498	1	-7.6	2
MolPort-001-740-300_ZINC000031155321	1	-7.6	4
MolPort-039-338-720_ZINC000096095464	1	-7.6	13
MolPort-001-779-935_ZINC000036057337	1	-7.6	6
MolPort-002-524-725_ZINC000064453567	1	-7.6	9
MolPort-019-937-090_ZINC000049181127	1	-7.6	4
MolPort-001-741-121_ZINC000014410655	1	-7.6	2
MolPort-019-764-784_ZINC000253531991	1	-7.6	5
MolPort-023-298-962_ZINC000087493014	1	-7.6	4
MolPort-039-338-437_ZINC000238739052	1	-7.6	4
MolPort-001-832-299_ZINC000000518473	1	-7.6	1
MolPort-035-706-362_ZINC000096023885	1	-7.5	8
MolPort-002-508-419_ZINC000004023124	1	-7.5	2
MolPort-001-739-485_ZINC000229938097	1	-7.5	3
MolPort-002-524-807_ZINC000253498760	1	-7.5	3
MolPort-039-339-013_ZINC000014711629	1	-7.5	10
MolPort-001-740-699_ZINC000036375281	1	-7.5	4
MolPort-021-804-526_ZINC000252505021	1	-7.5	8
MolPort-001-739-485_ZINC000031158814	1	-7.5	3
MolPort-019-937-067_ZINC000067912718	1	-7.5	7
MolPort-002-512-188_ZINC000004027521	1	-7.5	2
MolPort-002-506-898_ZINC000003815418	1	-7.5	3
MolPort-027-948-174_ZINC000252477567	1	-7.5	2
MolPort-002-508-883_ZINC000002106549	1	-7.5	5
MolPort-001-740-434_ZINC000001615142	1	-7.5	0
MolPort-001-742-097_ZINC000253500839	1	-7.5	18
MolPort-023-300-019_ZINC000252517496	1	-7.5	2
MolPort-020-006-037_ZINC000033831794	1	-7.5	10
MolPort-023-274-355_ZINC000014760237	1	-7.5	6
MolPort-002-528-151_ZINC000012875616	1	-7.5	4
MolPort-005-944-621_ZINC000031155646	1	-7.5	14
MolPort-001-739-485_ZINC000229938091	1	-7.5	3
MolPort-035-705-677_ZINC000006017923	1	-7.5	2
MolPort-002-508-419_ZINC000253499604	1	-7.5	2
MolPort-002-911-085_ZINC000253497713	1	-7.5	4
MolPort-005-944-806_ZINC000001872255	1	-7.5	4
MolPort-021-804-799_ZINC000014437288	1	-7.5	6
MolPort-001-741-269_ZINC000002083344	1	-7.5	3
MolPort-039-139-076_ZINC000003791929	1	-7.5	10
MolPort-000-775-583_ZINC000253506258	1	-7.5	12
MolPort-005-011-921_ZINC000011843017	1	-7.5	7
MolPort-003-960-187_ZINC000006483512	1	-7.5	3
MolPort-027-853-583_ZINC000248089453	1	-7.5	7
MolPort-001-740-911_ZINC000014410651	1	-7.5	3
MolPort-035-705-992_ZINC000059728632	1	-7.5	5
MolPort-038-386-575_ZINC000252516942	1	-7.5	5
MolPort-035-706-124_ZINC000095914837	1	-7.5	14
MolPort-027-853-583_ZINC000229772308	1	-7.5	7
MolPort-001-742-227_ZINC000044351843	1	-7.5	9
MolPort-002-325-565_ZINC000239073256	1	-7.5	16
MolPort-006-668-597_ZINC000031169794	1	-7.5	10
MolPort-001-832-299_ZINC000003881426	1	-7.5	1
MolPort-001-741-269_ZINC000009210416	1	-7.5	3
MolPort-001-740-524_ZINC000253500933	1	-7.5	16
MolPort-039-101-336_ZINC000254286794	1	-7.5	4
MolPort-035-681-152_ZINC000005758801	1	-7.5	7
MolPort-001-832-299_ZINC000000031991	1	-7.5	1
MolPort-019-764-784_ZINC000253531992	1	-7.5	5
MolPort-001-741-386_ZINC000253500929	1	-7.5	3
MolPort-019-737-268_ZINC000253531475	1	-7.5	7
MolPort-035-705-858_ZINC000100058643	1	-7.5	6
MolPort-023-300-019_ZINC000252517497	1	-7.5	2
MolPort-002-524-807_ZINC000012868385	1	-7.5	3
MolPort-019-936-790_ZINC000067913661	1	-7.5	14
MolPort-039-338-542_ZINC000014887147	1	-7.5	4
MolPort-001-741-109_ZINC000005854594	1	-7.5	2
MolPort-002-116-843_ZINC000253497332	1	-7.4	3
MolPort-001-789-441_ZINC000002983277	1	-7.4	9
MolPort-019-936-790_ZINC000067913658	1	-7.4	14
MolPort-039-338-274_ZINC000299817832	1	-7.4	9
MolPort-000-714-792_ZINC000252441408	1	-7.4	22
MolPort-000-706-811_ZINC000103890561	1	-7.4	19
MolPort-035-706-135_ZINC000015120190	1	-7.4	7
MolPort-001-740-535_ZINC000004098306	1	-7.4	4
MolPort-002-525-553_ZINC000038563736	1	-7.4	2
MolPort-003-959-685_ZINC000002033818	1	-7.4	8
MolPort-035-705-798_ZINC000095910344	1	-7.4	14
MolPort-001-779-935_ZINC000118912966	1	-7.4	6
MolPort-003-908-087_ZINC000003776888	1	-7.4	5
MolPort-001-741-269_ZINC000003953891	1	-7.4	3
MolPort-006-069-273_ZINC000238809655	1	-7.4	20
MolPort-001-740-387_ZINC000038143820	1	-7.4	15
MolPort-039-061-801_ZINC000026826077	1	-7.4	9
MolPort-001-740-170_ZINC000253388707	1	-7.4	15
MolPort-000-701-024_ZINC000252441490	1	-7.4	3
MolPort-021-804-665_ZINC000252505843	1	-7.4	2
MolPort-020-005-924_ZINC000100037376	1	-7.4	6
MolPort-002-176-718_ZINC000038358415	1	-7.4	5
MolPort-019-764-784_ZINC000253531994	1	-7.4	5
MolPort-035-706-083_ZINC000013339945	1	-7.4	9
MolPort-039-338-542_ZINC000014887157	1	-7.4	4
MolPort-002-507-825_ZINC000001433941	1	-7.4	3
MolPort-035-706-079_ZINC000100059326	1	-7.4	14
MolPort-001-740-357_ZINC000013374325	1	-7.4	11
MolPort-005-944-811_ZINC000015258073	1	-7.4	4
MolPort-044-181-074_ZINC000524731672	1	-7.4	2
MolPort-002-911-085_ZINC000253497714	1	-7.4	4
MolPort-028-610-075_ZINC000253534342	1	-7.4	15
MolPort-003-911-498_ZINC000253497612	1	-7.4	5
MolPort-002-116-843_ZINC000253497334	1	-7.4	3
MolPort-001-742-502_ZINC000248007364	1	-7.4	4
MolPort-039-339-054_ZINC000255209314	1	-7.4	22
MolPort-001-933-059_ZINC000000828203	1	-7.4	4
MolPort-005-944-851_ZINC000005567798	1	-7.4	6
MolPort-044-561-683_ZINC000071769612	1	-7.4	3
MolPort-019-937-090_ZINC000049181121	1	-7.4	4
MolPort-003-983-881_ZINC000004517154	1	-7.4	5
MolPort-039-338-252_ZINC000238749956	1	-7.4	11
MolPort-003-666-238_ZINC000008214766	1	-7.4	16
MolPort-039-142-036_ZINC000014820619	1	-7.4	1
MolPort-001-741-109_ZINC000005854293	1	-7.4	2
MolPort-001-741-269_ZINC000005997298	1	-7.4	3
MolPort-028-610-075_ZINC000253534343	1	-7.4	15
MolPort-000-701-024_ZINC000252441491	1	-7.4	3
MolPort-003-936-051_ZINC000001872131	1	-7.4	2
MolPort-002-903-705_ZINC000005733557	1	-7.4	2
MolPort-044-183-443_ZINC000085566206	1	-7.4	11
MolPort-020-005-776_ZINC000028968107	1	-7.4	15
MolPort-000-775-583_ZINC000253506252	1	-7.4	12
MolPort-020-005-924_ZINC000100037384	1	-7.4	6
MolPort-001-741-386_ZINC000253500931	1	-7.4	3
MolPort-005-945-965_ZINC000013507844	1	-7.4	9
MolPort-028-744-727_ZINC000003951739	1	-7.3	4
MolPort-001-742-502_ZINC000248008256	1	-7.3	4
MolPort-003-911-498_ZINC000253497610	1	-7.3	5
MolPort-039-052-658_ZINC000005132927	1	-7.3	5
MolPort-001-742-282_ZINC000031164529	1	-7.3	11
MolPort-039-338-427_ZINC000014814927	1	-7.3	4
MolPort-005-910-359_ZINC000085555528	1	-7.3	12
MolPort-035-706-081_ZINC000096023863	1	-7.3	17
MolPort-000-707-678_ZINC000013424697	1	-7.3	14
MolPort-001-683-953_ZINC000004082214	1	-7.3	8
MolPort-035-705-968_ZINC000014780122	1	-7.3	4
MolPort-000-726-918_ZINC000253501597	1	-7.3	3
MolPort-006-069-345_ZINC000005369099	1	-7.3	9
MolPort-002-911-100_ZINC000253497664	1	-7.3	1
MolPort-002-525-553_ZINC000004081132	1	-7.3	2
MolPort-000-726-918_ZINC000044582844	1	-7.3	3
MolPort-038-386-575_ZINC000252516941	1	-7.3	5
MolPort-021-804-567_ZINC000248012330	1	-7.3	5
MolPort-001-740-873_ZINC000000338331	1	-7.3	6
MolPort-001-742-402_ZINC000100062394	1	-7.3	5
MolPort-002-893-379_ZINC000001693423	1	-7.3	2
MolPort-006-668-378_ZINC000253529982	1	-7.3	16
MolPort-019-937-021_ZINC000013838615	1	-7.3	5
MolPort-000-761-123_ZINC000000477939	1	-7.3	6
MolPort-005-945-965_ZINC000006036807	1	-7.3	9
MolPort-002-911-085_ZINC000253497712	1	-7.3	4
MolPort-001-740-163_ZINC000015274351	1	-7.3	3
MolPort-000-124-380_ZINC000004478070	1	-7.3	5
MolPort-002-911-087_ZINC000253497717	1	-7.3	3
MolPort-002-911-113_ZINC000253497995	1	-7.3	7
MolPort-019-937-067_ZINC000253389028	1	-7.3	7
MolPort-035-705-823_ZINC000096023698	1	-7.3	7
MolPort-039-338-824_ZINC000205458339	1	-7.3	4
MolPort-001-740-163_ZINC000015274350	1	-7.3	3
MolPort-035-705-678_ZINC000006017925	1	-7.3	2
MolPort-001-740-524_ZINC000253500939	1	-7.3	16
MolPort-002-116-843_ZINC000253497333	1	-7.3	3
MolPort-001-742-706_ZINC000253388415	1	-7.3	4
MolPort-002-508-419_ZINC000253499603	1	-7.3	2
MolPort-001-742-589_ZINC000019796061	1	-7.3	1
MolPort-019-936-889_ZINC000253390546	1	-7.3	13
MolPort-001-832-299_ZINC000003869899	1	-7.3	1
MolPort-028-610-075_ZINC000097971614	1	-7.3	15
MolPort-002-159-504_ZINC000000439867	1	-7.3	4
MolPort-002-508-419_ZINC000004023126	1	-7.3	2
MolPort-000-713-217_ZINC000009007546	1	-7.3	9
MolPort-021-804-711_ZINC000072320389	1	-7.3	8
MolPort-002-911-087_ZINC000253497716	1	-7.3	3
MolPort-001-742-402_ZINC000247999548	1	-7.3	5
MolPort-005-944-665_ZINC000006092939	1	-7.3	6
MolPort-001-897-044_ZINC000247855168	1	-7.3	3
MolPort-001-741-269_ZINC000013783427	1	-7.3	3
MolPort-002-911-113_ZINC000253497993	1	-7.3	7
MolPort-021-804-747_ZINC000034319582	1	-7.3	2
MolPort-003-935-138_ZINC000004245684	1	-7.3	9
MolPort-023-276-329_ZINC000013607514	1	-7.3	5
MolPort-039-338-523_ZINC000255269628	1	-7.3	20
MolPort-028-610-187_ZINC000015121008	1	-7.3	9
MolPort-000-124-380_ZINC000004478068	1	-7.3	5
MolPort-002-524-725_ZINC000070691555	1	-7.3	9
MolPort-001-740-396_ZINC000031155594	1	-7.3	9
MolPort-019-936-734_ZINC000067902828	1	-7.3	6
MolPort-002-176-718_ZINC000253499207	1	-7.3	5
MolPort-039-338-733_ZINC000006536273	1	-7.2	5
MolPort-000-165-376_ZINC000000338284	1	-7.2	4
MolPort-001-742-706_ZINC000253388412	1	-7.2	4
MolPort-039-052-612_ZINC000014727931	1	-7.2	5
MolPort-002-911-104_ZINC000253497996	1	-7.2	8
MolPort-001-740-269_ZINC000000296185	1	-7.2	3
MolPort-001-779-935_ZINC000059065484	1	-7.2	6
MolPort-001-741-695_ZINC000004098933	1	-7.2	8
MolPort-006-668-644_ZINC000031170087	1	-7.2	8
MolPort-023-274-355_ZINC000014760235	1	-7.2	6
MolPort-042-675-221_ZINC000238753983	1	-7.2	20
MolPort-001-740-250_ZINC000253500806	1	-7.2	11
MolPort-001-740-911_ZINC000014410646	1	-7.2	3
MolPort-003-937-802_ZINC000014952116	1	-7.2	17
MolPort-001-740-170_ZINC000253388706	1	-7.2	15
MolPort-002-525-553_ZINC000004081136	1	-7.2	2
MolPort-019-766-739_ZINC000075270374	1	-7.2	2
MolPort-000-848-456_ZINC000004906156	1	-7.2	0
MolPort-035-683-133_ZINC000087492983	1	-7.2	4
MolPort-003-911-498_ZINC000253497611	1	-7.2	5
MolPort-005-945-627_ZINC000004098607	1	-7.2	5
MolPort-002-116-843_ZINC000004612836	1	-7.2	3
MolPort-035-705-815_ZINC000005648525	1	-7.2	3
MolPort-000-848-456_ZINC000003176041	1	-7.2	0
MolPort-001-740-163_ZINC000015274349	1	-7.2	3
MolPort-021-804-567_ZINC000248012342	1	-7.2	5
MolPort-001-740-387_ZINC000038143822	1	-7.2	15
MolPort-002-525-771_ZINC000004081360	1	-7.2	7
MolPort-035-705-977_ZINC000014437227	1	-7.2	6
MolPort-035-706-521_ZINC000095933385	1	-7.2	14
MolPort-000-701-024_ZINC000252441488	1	-7.2	3
MolPort-005-944-851_ZINC000033505346	1	-7.2	6
MolPort-005-944-536_ZINC000248070703	1	-7.2	9
MolPort-002-818-068_ZINC000000481579	1	-7.2	7
MolPort-002-507-418_ZINC000000899166	1	-7.2	11
MolPort-001-742-351_ZINC000013136661	1	-7.2	9
MolPort-005-944-748_ZINC000253389364	1	-7.2	9
MolPort-019-737-268_ZINC000253531473	1	-7.2	7
MolPort-002-087-515_ZINC000004029338	1	-7.2	2
MolPort-005-944-621_ZINC000031155655	1	-7.2	14
MolPort-019-936-838_ZINC000001711825	1	-7.2	2
MolPort-001-740-314_ZINC000031155424	1	-7.2	7
MolPort-039-338-881_ZINC000013383630	1	-7.2	3
MolPort-000-757-044_ZINC000253530361	1	-7.2	30
MolPort-038-386-600_ZINC000252516281	1	-7.2	17
MolPort-039-052-535_ZINC000085602366	1	-7.2	2
MolPort-005-945-965_ZINC000013507846	1	-7.2	9
MolPort-002-911-100_ZINC000253497665	1	-7.2	1
MolPort-035-705-972_ZINC000005998555	1	-7.2	5
MolPort-039-052-506_ZINC000014728438	1	-7.2	5
MolPort-001-740-314_ZINC000031155418	1	-7.1	7
MolPort-006-668-499_ZINC000003870887	1	-7.1	5
MolPort-001-742-186_ZINC000038143766	1	-7.1	16
MolPort-005-945-005_ZINC000000689725	1	-7.1	9
MolPort-001-742-351_ZINC000006528354	1	-7.1	9
MolPort-002-507-825_ZINC000018144039	1	-7.1	3
MolPort-005-944-006_ZINC000005765088	1	-7.1	3
MolPort-002-911-100_ZINC000253497666	1	-7.1	1
MolPort-019-936-889_ZINC000253390544	1	-7.1	13
MolPort-001-742-282_ZINC000031164525	1	-7.1	11
MolPort-003-927-231_ZINC000095615313	1	-7.1	5
MolPort-035-705-909_ZINC000096023667	1	-7.1	9
MolPort-000-707-678_ZINC000013521023	1	-7.1	14
MolPort-021-804-526_ZINC000252505019	1	-7.1	8
MolPort-005-945-066_ZINC000031164159	1	-7.1	5
MolPort-035-705-820_ZINC000096023893	1	-7.1	5
MolPort-005-944-842_ZINC000067910611	1	-7.1	16
MolPort-039-338-507_ZINC000006040344	1	-7.1	11
MolPort-002-515-576_ZINC000004037920	1	-7.1	5
MolPort-023-274-268_ZINC000003871987	1	-7.1	6
MolPort-001-741-695_ZINC000005665087	1	-7.1	8
MolPort-027-641-149_ZINC000030730478	1	-7.1	8
MolPort-035-706-036_ZINC000098214437	1	-7.1	10
MolPort-000-761-123_ZINC000000477938	1	-7.1	6
MolPort-001-740-250_ZINC000253500804	1	-7.1	11
MolPort-005-944-621_ZINC000031155660	1	-7.1	14
MolPort-002-524-725_ZINC000070691553	1	-7.1	9
MolPort-001-740-955_ZINC000013402425	1	-7.1	7
MolPort-039-338-542_ZINC000014887154	1	-7.1	4
MolPort-035-706-037_ZINC000006018635	1	-7.1	9
MolPort-042-675-505_ZINC000018272247	1	-7.1	12
MolPort-006-668-378_ZINC000253529983	1	-7.1	16
MolPort-005-944-665_ZINC000006092955	1	-7.1	6
MolPort-019-936-889_ZINC000253390541	1	-7.1	13
MolPort-002-798-840_ZINC000001000254	1	-7.1	0
MolPort-000-713-217_ZINC000036370614	1	-7.1	9
MolPort-001-742-706_ZINC000253388414	1	-7.1	4
MolPort-005-945-066_ZINC000031164167	1	-7.1	5
MolPort-005-944-806_ZINC000001872259	1	-7.1	4
MolPort-039-338-437_ZINC000261493072	1	-7.1	4
MolPort-002-507-825_ZINC000018102655	1	-7.1	3
MolPort-005-945-697_ZINC000002570158	1	-7.1	6
MolPort-002-525-771_ZINC000004081362	1	-7.1	7
MolPort-027-641-205_ZINC000022061725	1	-7.1	7
MolPort-023-274-355_ZINC000001645468	1	-7.1	6
MolPort-002-507-400_ZINC000000035527	1	-7.1	8
MolPort-001-897-044_ZINC000247855174	1	-7.1	3
MolPort-001-897-044_ZINC000013550925	1	-7.1	3
MolPort-021-804-805_ZINC000077269642	1	-7.1	16
MolPort-002-507-400_ZINC000000035526	1	-7.1	8
MolPort-019-773-838_ZINC000001016260	1	-7.1	5
MolPort-002-525-771_ZINC000004081365	1	-7.1	7
MolPort-000-713-217_ZINC000253501835	1	-7.1	9
MolPort-003-804-191_ZINC000003992526	1	-7.1	3
MolPort-001-789-441_ZINC000004117655	1	-7.1	9
MolPort-035-705-992_ZINC000059728627	1	-7.1	5
MolPort-039-142-054_ZINC000000899851	1	-7	5
MolPort-039-338-687_ZINC000013340662	1	-7	4
MolPort-039-142-054_ZINC000000899848	1	-7	5
MolPort-005-944-851_ZINC000001588843	1	-7	6
MolPort-001-949-855_ZINC000000278217	1	-7	1
MolPort-035-706-155_ZINC000039010260	1	-7	5
MolPort-003-959-685_ZINC000005273905	1	-7	8
MolPort-001-740-838_ZINC000005732241	1	-7	4
MolPort-005-945-072_ZINC000005732527	1	-7	7
MolPort-019-937-090_ZINC000049181124	1	-7	4
MolPort-001-740-821_ZINC000015266506	1	-7	9
MolPort-009-198-243_ZINC000005998211	1	-7	6
MolPort-019-766-739_ZINC000075270370	1	-7	2
MolPort-023-279-004_ZINC000015117976	1	-7	5
MolPort-021-804-526_ZINC000252505020	1	-7	8
MolPort-023-274-270_ZINC000028536312	1	-7	15
MolPort-001-740-789_ZINC000014436792	1	-7	7
MolPort-001-740-535_ZINC000000001419	1	-7	4
MolPort-001-740-758_ZINC000008952339	1	-7	11
MolPort-019-936-742_ZINC000150664131	1	-7	18
MolPort-003-665-822_ZINC000005732375	1	-7	4
MolPort-039-338-542_ZINC000014887151	1	-7	4
MolPort-042-624-498_ZINC000014820552	1	-7	3
MolPort-002-525-771_ZINC000004081361	1	-7	7
MolPort-001-779-935_ZINC000043758019	1	-7	6
MolPort-000-165-376_ZINC000000338283	1	-7	4
MolPort-003-908-087_ZINC000004532431	1	-7	5
MolPort-019-937-169_ZINC000005839381	1	-7	10
MolPort-006-668-426_ZINC000005854532	1	-7	7
MolPort-007-980-738_ZINC000253387985	1	-7	1
MolPort-002-507-825_ZINC000018183294	1	-7	3
MolPort-001-741-269_ZINC000013783428	1	-7	3
MolPort-001-742-477_ZINC000028537346	1	-7	4
MolPort-001-740-955_ZINC000031157798	1	-7	7
MolPort-001-742-402_ZINC000247999543	1	-7	5
MolPort-005-945-965_ZINC000013507842	1	-7	9
MolPort-002-911-100_ZINC000004369665	1	-7	1
MolPort-005-944-851_ZINC000014557640	1	-7	6
MolPort-035-706-535_ZINC000013340319	1	-7	8
MolPort-042-675-353_ZINC000004096264	1	-6.9	8
MolPort-005-129-731_ZINC000011818031	1	-6.9	6
MolPort-038-386-600_ZINC000252516282	1	-6.9	17
MolPort-005-945-066_ZINC000031164155	1	-6.9	5
MolPort-038-386-575_ZINC000252516943	1	-6.9	5
MolPort-003-846-731_ZINC000002558134	1	-6.9	3
MolPort-001-739-256_ZINC000248240826	1	-6.9	17
MolPort-002-508-662_ZINC000000517415	1	-6.9	7
MolPort-005-945-005_ZINC000106611619	1	-6.9	9
MolPort-005-944-536_ZINC000248070690	1	-6.9	9
MolPort-002-814-819_ZINC000001687167	1	-6.9	4
MolPort-007-980-738_ZINC000020805004	1	-6.9	1
MolPort-023-279-003_ZINC000034169935	1	-6.9	8
MolPort-006-668-326_ZINC000031156147	1	-6.9	12
MolPort-002-524-075_ZINC000004000041	1	-6.9	1
MolPort-039-141-793_ZINC000004097850	1	-6.9	4
MolPort-003-940-355_ZINC000013111092	1	-6.9	6
MolPort-019-937-067_ZINC000253389027	1	-6.9	7
MolPort-002-524-864_ZINC000004000056	1	-6.9	2
MolPort-039-338-274_ZINC000095680316	1	-6.9	9
MolPort-001-741-500_ZINC000034955328	1	-6.9	8
MolPort-001-740-349_ZINC000005732268	1	-6.9	4
MolPort-039-338-191_ZINC000013429289	1	-6.9	5
MolPort-007-980-738_ZINC000253387984	1	-6.9	1
MolPort-001-739-484_ZINC000000007778	1	-6.9	8
MolPort-007-980-877_ZINC000004731321	1	-6.9	3
MolPort-002-529-771_ZINC000008789489	1	-6.9	12
MolPort-035-705-939_ZINC000070455246	1	-6.9	6
MolPort-002-321-253_ZINC000003203266	1	-6.9	3
MolPort-006-318-917_ZINC000005640448	1	-6.9	3
MolPort-039-052-458_ZINC000014642730	1	-6.9	6
MolPort-039-338-684_ZINC000040576475	1	-6.9	6
MolPort-005-944-782_ZINC000003978134	1	-6.9	6
MolPort-019-936-884_ZINC000067913388	1	-6.9	9
MolPort-001-740-250_ZINC000253500805	1	-6.8	11
MolPort-006-668-425_ZINC000005854524	1	-6.8	7
MolPort-035-706-155_ZINC000039010261	1	-6.8	5
MolPort-021-804-665_ZINC000015057917	1	-6.8	2
MolPort-001-897-044_ZINC000229903602	1	-6.8	3
MolPort-001-740-250_ZINC000253500807	1	-6.8	11
MolPort-001-913-428_ZINC000000051924	1	-6.8	2
MolPort-007-980-877_ZINC000004731322	1	-6.8	3
MolPort-035-706-320_ZINC000098214460	1	-6.8	18
MolPort-003-361-283_ZINC000011865165	1	-6.8	4
MolPort-038-386-731_ZINC000001560625	1	-6.8	4
MolPort-001-740-292_ZINC000031155308	1	-6.8	6
MolPort-042-675-505_ZINC000257603519	1	-6.8	12
MolPort-001-636-370_ZINC000000035530	1	-6.8	5
MolPort-005-944-806_ZINC000001872258	1	-6.8	4
MolPort-001-742-280_ZINC000012153561	1	-6.8	3
MolPort-007-549-184_ZINC000006719013	1	-6.8	4
MolPort-002-499-107_ZINC000004228284	1	-6.8	12
MolPort-002-325-565_ZINC000239073257	1	-6.8	16
MolPort-000-701-024_ZINC000252441489	1	-6.8	3
MolPort-002-911-104_ZINC000253497998	1	-6.8	8
MolPort-019-936-889_ZINC000253390543	1	-6.8	13
MolPort-035-705-908_ZINC000034265086	1	-6.8	7
MolPort-039-338-425_ZINC000014642994	1	-6.8	6
MolPort-001-789-441_ZINC000002983276	1	-6.8	9
MolPort-042-675-505_ZINC000033831904	1	-6.8	12
MolPort-001-742-392_ZINC000015208649	1	-6.8	4
MolPort-000-713-217_ZINC000253501831	1	-6.8	9
MolPort-002-911-104_ZINC000253497999	1	-6.8	8
MolPort-042-675-505_ZINC000003794009	1	-6.8	12
MolPort-001-741-659_ZINC000006018563	1	-6.8	3
MolPort-002-989-660_ZINC000008730438	1	-6.8	1
MolPort-005-944-536_ZINC000248070698	1	-6.8	9
MolPort-002-529-771_ZINC000012879245	1	-6.8	12
MolPort-007-980-738_ZINC000253387986	1	-6.8	1
MolPort-021-804-439_ZINC000077268795	1	-6.8	15
MolPort-042-675-353_ZINC000004096337	1	-6.8	8
MolPort-027-640-891_ZINC000004097122	1	-6.8	13
MolPort-000-848-456_ZINC000004906153	1	-6.8	0
MolPort-005-945-314_ZINC000014651078	1	-6.8	3
MolPort-002-524-075_ZINC000004000040	1	-6.8	1
MolPort-039-338-585_ZINC000014814875	1	-6.8	4
MolPort-039-326-727_ZINC000390822805	1	-6.8	0
MolPort-001-740-387_ZINC000044362063	1	-6.7	15
MolPort-001-739-318_ZINC000006069169	1	-6.7	3
MolPort-039-052-546_ZINC000038876020	1	-6.7	4
MolPort-005-945-005_ZINC000006793326	1	-6.7	9
MolPort-001-740-955_ZINC000031157788	1	-6.7	7
MolPort-001-492-402_ZINC000000042677	1	-6.7	5
MolPort-035-846-184_ZINC000159906551	1	-6.7	2
MolPort-002-818-056_ZINC000000481563	1	-6.7	2
MolPort-035-846-184_ZINC000159906818	1	-6.7	2
MolPort-035-705-698_ZINC000001649219	1	-6.7	3
MolPort-035-706-061_ZINC000096023772	1	-6.7	11
MolPort-028-610-167_ZINC000097971733	1	-6.7	19
MolPort-001-742-706_ZINC000253388413	1	-6.7	4
MolPort-023-278-995_ZINC000077031606	1	-6.7	3
MolPort-044-175-437_ZINC000015121972	1	-6.7	6
MolPort-001-742-351_ZINC000000899938	1	-6.7	9
MolPort-027-853-570_ZINC000101669329	1	-6.7	10
MolPort-039-338-219_ZINC000014441557	1	-6.7	2
MolPort-001-739-420_ZINC000000895263	1	-6.7	7
MolPort-002-506-661_ZINC000006745365	1	-6.7	3
MolPort-035-706-147_ZINC000013370395	1	-6.7	15
MolPort-039-141-864_ZINC000013412598	1	-6.7	8
MolPort-035-705-820_ZINC000098214409	1	-6.7	5
MolPort-039-338-746_ZINC000013374008	1	-6.7	3
MolPort-038-386-600_ZINC000252516283	1	-6.7	17
MolPort-001-742-400_ZINC000031165817	1	-6.7	9
MolPort-019-937-187_ZINC000067902540	1	-6.7	7
MolPort-042-675-353_ZINC000008551637	1	-6.7	8
MolPort-039-339-006_ZINC000013383333	1	-6.7	4
MolPort-001-740-821_ZINC000015266508	1	-6.6	9
MolPort-006-668-326_ZINC000031156152	1	-6.6	12
MolPort-000-710-613_ZINC000070691794	1	-6.6	11
MolPort-002-510-559_ZINC000004026203	1	-6.6	4
MolPort-039-339-086_ZINC000014681710	1	-6.6	13
MolPort-022-392-582_ZINC000001722927	1	-6.6	3
MolPort-004-955-367_ZINC000001726300	1	-6.6	4
MolPort-021-804-665_ZINC000138560360	1	-6.6	2
MolPort-000-848-456_ZINC000004027344	1	-6.6	0
MolPort-005-944-806_ZINC000000900115	1	-6.6	4
MolPort-000-452-050_ZINC000253497769	1	-6.6	9
MolPort-001-740-821_ZINC000015266510	1	-6.6	9
MolPort-005-944-824_ZINC000014650938	1	-6.6	4
MolPort-039-016-239_ZINC000005421222	1	-6.6	7
MolPort-000-452-049_ZINC000253497797	1	-6.6	13
MolPort-035-706-052_ZINC000005410561	1	-6.6	11
MolPort-001-913-428_ZINC000000051923	1	-6.6	2
MolPort-021-804-665_ZINC000252505842	1	-6.6	2
MolPort-003-846-731_ZINC000003833872	1	-6.6	3
MolPort-005-944-535_ZINC000248105726	1	-6.6	12
MolPort-002-499-107_ZINC000013545957	1	-6.6	12
MolPort-003-931-203_ZINC000002149617	1	-6.6	6
MolPort-009-198-191_ZINC000003776540	1	-6.6	6
MolPort-039-338-191_ZINC000013429291	1	-6.6	5
MolPort-038-941-702_ZINC000034546884	1	-6.6	2
MolPort-002-521-523_ZINC000004064009	1	-6.6	5
MolPort-005-945-005_ZINC000006793327	1	-6.6	9
MolPort-021-783-287_ZINC000004097574	1	-6.6	14
MolPort-002-526-757_ZINC000004081998	1	-6.6	1
MolPort-001-740-553_ZINC000013311346	1	-6.6	11
MolPort-019-937-024_ZINC000014758732	1	-6.6	5
MolPort-039-015-668_ZINC000083260785	1	-6.6	12
MolPort-039-340-773_ZINC000253470864	1	-6.6	5
MolPort-000-714-792_ZINC000252441406	1	-6.6	22
MolPort-000-731-552_ZINC000000525698	1	-6.6	5
MolPort-002-818-056_ZINC000000481564	1	-6.6	2
MolPort-019-764-784_ZINC000253531993	1	-6.6	5
MolPort-044-175-437_ZINC000001646489	1	-6.6	6
MolPort-001-740-292_ZINC000031155312	1	-6.6	6
MolPort-035-846-184_ZINC000159906407	1	-6.6	2
MolPort-039-338-571_ZINC000015270842	1	-6.6	7
MolPort-005-945-066_ZINC000031164163	1	-6.6	5
MolPort-002-325-565_ZINC000239073254	1	-6.5	16
MolPort-005-944-535_ZINC000248105731	1	-6.5	12
MolPort-002-533-843_ZINC000004090458	1	-6.5	7
MolPort-006-668-581_ZINC000015147904	1	-6.5	4
MolPort-039-338-165_ZINC000014648849	1	-6.5	5
MolPort-022-879-802_ZINC000039390775	1	-6.5	2
MolPort-028-599-907_ZINC000013509501	1	-6.5	9
MolPort-000-723-922_ZINC000004097583	1	-6.5	11
MolPort-001-740-553_ZINC000013311353	1	-6.5	11
MolPort-001-741-500_ZINC000034955329	1	-6.5	8
MolPort-044-561-800_ZINC000034045609	1	-6.5	3
MolPort-001-741-500_ZINC000034955330	1	-6.5	8
MolPort-001-785-792_ZINC000006845904	1	-6.5	15
MolPort-000-452-049_ZINC000253497800	1	-6.5	13
MolPort-039-338-316_ZINC000014728481	1	-6.5	5
MolPort-039-338-191_ZINC000013429287	1	-6.5	5
MolPort-001-636-370_ZINC000000035529	1	-6.5	5
MolPort-019-937-024_ZINC000014758734	1	-6.5	5
MolPort-005-944-536_ZINC000248070694	1	-6.5	9
MolPort-035-706-519_ZINC000006070275	1	-6.5	3
MolPort-035-706-190_ZINC000027550862	1	-6.5	1
MolPort-001-739-525_ZINC000003789195	1	-6.5	6
MolPort-039-338-491_ZINC000013507959	1	-6.5	10
MolPort-029-887-077_ZINC000015208889	1	-6.5	4
MolPort-001-742-593_ZINC000100009278	1	-6.5	6
MolPort-003-959-685_ZINC000005273906	1	-6.5	8
MolPort-002-507-828_ZINC000002444172	1	-6.5	1
MolPort-021-804-805_ZINC000077269636	1	-6.5	16
MolPort-044-561-226_ZINC000004097489	1	-6.5	12
MolPort-001-742-392_ZINC000015208646	1	-6.5	4
MolPort-039-141-968_ZINC000149170493	1	-6.5	3
MolPort-019-937-133_ZINC000034430431	1	-6.5	11
MolPort-001-741-500_ZINC000018256158	1	-6.5	8
MolPort-002-514-557_ZINC000000434672	1	-6.5	2
MolPort-035-846-184_ZINC000159906680	1	-6.5	2
MolPort-003-959-685_ZINC000002033819	1	-6.4	8
MolPort-002-893-591_ZINC000150344933	1	-6.4	20
MolPort-001-739-528_ZINC000013305561	1	-6.4	3
MolPort-001-742-464_ZINC000001595957	1	-6.4	8
MolPort-039-339-165_ZINC000000338330	1	-6.4	4
MolPort-039-137-790_ZINC000095639161	1	-6.4	11
MolPort-035-706-156_ZINC000000899123	1	-6.4	6
MolPort-021-804-470_ZINC000013838742	1	-6.4	2
MolPort-002-507-828_ZINC000002444174	1	-6.4	1
MolPort-044-561-226_ZINC000012362075	1	-6.4	12
MolPort-012-198-500_ZINC000040385796	1	-6.4	5
MolPort-001-739-256_ZINC000248240824	1	-6.4	17
MolPort-042-675-353_ZINC000004096262	1	-6.4	8
MolPort-002-507-606_ZINC000004046820	1	-6.4	7
MolPort-003-876-448_ZINC000001095283	1	-6.4	2
MolPort-021-675-945_ZINC000005761412	1	-6.4	3
MolPort-002-526-489_ZINC000008234283	1	-6.4	0
MolPort-001-740-689_ZINC000028820378	1	-6.4	14
MolPort-021-675-945_ZINC000005761187	1	-6.4	3
MolPort-001-739-528_ZINC000013305564	1	-6.4	3
MolPort-027-853-669_ZINC000096295983	1	-6.4	9
MolPort-001-740-553_ZINC000013311349	1	-6.4	11
MolPort-023-274-355_ZINC000006006751	1	-6.4	6
MolPort-035-706-320_ZINC000038429172	1	-6.4	18
MolPort-002-521-523_ZINC000004064007	1	-6.4	5
MolPort-001-739-256_ZINC000248240828	1	-6.4	17
MolPort-039-338-191_ZINC000013429285	1	-6.4	5
MolPort-044-175-437_ZINC000001646488	1	-6.3	6
MolPort-039-338-372_ZINC000005765855	1	-6.3	1
MolPort-005-910-094_ZINC000049538670	1	-6.3	1
MolPort-035-705-635_ZINC000014489321	1	-6.3	1
MolPort-039-137-790_ZINC000095639160	1	-6.3	11
MolPort-005-944-340_ZINC000031164794	1	-6.3	5
MolPort-035-706-250_ZINC000096023837	1	-6.3	4
MolPort-028-610-167_ZINC000097971734	1	-6.3	19
MolPort-021-675-945_ZINC000005761413	1	-6.3	3
MolPort-005-271-945_ZINC000020593688	1	-6.3	4
MolPort-001-739-256_ZINC000107434573	1	-6.3	17
MolPort-001-740-553_ZINC000013311350	1	-6.3	11
MolPort-001-904-078_ZINC000000189944	1	-6.3	5
MolPort-001-636-370_ZINC000000035528	1	-6.3	5
MolPort-002-148-265_ZINC000003654613	1	-6.3	7
MolPort-019-936-837_ZINC000026832404	1	-6.3	3
MolPort-002-799-353_ZINC000000339740	1	-6.3	4
MolPort-003-927-230_ZINC000004098262	1	-6.3	2
MolPort-003-934-465_ZINC000001542895	1	-6.3	10
MolPort-001-742-451_ZINC000028539634	1	-6.3	4
MolPort-001-739-865_ZINC000013460752	1	-6.3	2
MolPort-006-395-732_ZINC000022065922	1	-6.3	6
MolPort-001-636-370_ZINC000000035531	1	-6.3	5
MolPort-005-910-094_ZINC000049538671	1	-6.3	1
MolPort-005-944-340_ZINC000031164783	1	-6.3	5
MolPort-019-936-837_ZINC000026832394	1	-6.3	3
MolPort-035-706-039_ZINC000015270770	1	-6.3	5
MolPort-039-338-927_ZINC000299817670	1	-6.3	13
MolPort-001-742-392_ZINC000015208654	1	-6.3	4
MolPort-021-783-287_ZINC000004097575	1	-6.3	14
MolPort-038-386-600_ZINC000252516284	1	-6.3	17
MolPort-001-740-955_ZINC000031157793	1	-6.3	7
MolPort-039-338-178_ZINC000014514479	1	-6.3	8
MolPort-005-129-731_ZINC000011818030	1	-6.2	6
MolPort-023-298-858_ZINC000087492966	1	-6.2	4
MolPort-021-784-838_ZINC000022066763	1	-6.2	10
MolPort-027-637-273_ZINC000015209455	1	-6.2	2
MolPort-005-910-094_ZINC000049538669	1	-6.2	1
MolPort-028-599-891_ZINC000013307187	1	-6.2	4
MolPort-038-386-696_ZINC000252515031	1	-6.2	4
MolPort-000-731-552_ZINC000000052858	1	-6.2	5
MolPort-023-274-270_ZINC000028536309	1	-6.2	15
MolPort-005-944-535_ZINC000248105733	1	-6.2	12
MolPort-039-141-892_ZINC000059064833	1	-6.2	5
MolPort-001-742-400_ZINC000031165820	1	-6.2	9
MolPort-000-731-552_ZINC000004027641	1	-6.2	5
MolPort-035-706-249_ZINC000035049228	1	-6.2	2
MolPort-002-904-641_ZINC000001037159	1	-6.2	0
MolPort-006-668-326_ZINC000031156156	1	-6.2	12
MolPort-019-936-837_ZINC000026832400	1	-6.2	3
MolPort-019-936-837_ZINC000026832397	1	-6.2	3
MolPort-003-987-477_ZINC000001612328	1	-6.2	8
MolPort-002-148-265_ZINC000003613216	1	-6.2	7
MolPort-006-126-026_ZINC000002507487	1	-6.2	5
MolPort-001-742-371_ZINC000000897924	1	-6.2	2
MolPort-015-051-686_ZINC000035410507	1	-6.1	6
MolPort-035-705-642_ZINC000014517491	1	-6.1	5
MolPort-002-508-801_ZINC000004023505	1	-6.1	0
MolPort-001-740-821_ZINC000015266513	1	-6.1	9
MolPort-001-741-438_ZINC000013377891	1	-6.1	14
MolPort-001-739-465_ZINC000013480529	1	-6.1	5
MolPort-000-452-050_ZINC000001448969	1	-6.1	9
MolPort-003-906-432_ZINC000241132997	1	-6.1	2
MolPort-039-338-416_ZINC000034180361	1	-6.1	1
MolPort-004-351-030_ZINC000019517337	1	-6.1	3
MolPort-005-944-535_ZINC000248105729	1	-6.1	12
MolPort-002-806-732_ZINC000000340866	1	-6.1	4
MolPort-005-945-034_ZINC000002585423	1	-6.1	8
MolPort-001-739-249_ZINC000031155929	1	-6.1	3
MolPort-005-944-226_ZINC000006069011	1	-6.1	4
MolPort-001-739-465_ZINC000013480530	1	-6	5
MolPort-039-338-567_ZINC000238743929	1	-6	9
MolPort-001-742-593_ZINC000100009280	1	-6	6
MolPort-000-860-909_ZINC000100963287	1	-6	1
MolPort-012-198-500_ZINC000013541615	1	-6	5
MolPort-029-943-150_ZINC000225459406	1	-6	4
MolPort-021-784-838_ZINC000034513670	1	-6	10
MolPort-003-801-406_ZINC000004087035	1	-6	3
MolPort-005-910-094_ZINC000100779034	1	-6	1
MolPort-001-806-054_ZINC000000136036	1	-6	8
MolPort-021-675-945_ZINC000005761186	1	-6	3
MolPort-002-152-929_ZINC000000062002	1	-6	4
MolPort-001-741-760_ZINC000000338221	1	-6	4
MolPort-039-137-790_ZINC000034114040	1	-6	11
MolPort-038-386-696_ZINC000252515032	1	-6	4
MolPort-006-668-326_ZINC000031156142	1	-6	12
MolPort-005-910-094_ZINC000001734352	1	-6	1
MolPort-001-018-010_ZINC000000083315	1	-6	4
MolPort-001-742-392_ZINC000015208652	1	-6	4
MolPort-035-706-196_ZINC000059589003	1	-5.9	2
MolPort-015-051-686_ZINC000035410505	1	-5.9	6
MolPort-035-929-946_ZINC000242437515	1	-5.9	2
MolPort-003-803-086_ZINC000000336322	1	-5.9	2
MolPort-001-904-078_ZINC000000189939	1	-5.9	5
MolPort-035-929-946_ZINC000217634649	1	-5.9	2
MolPort-000-710-613_ZINC000103899095	1	-5.9	11
MolPort-027-906-087_ZINC000095410473	1	-5.9	6
MolPort-002-507-443_ZINC000003882001	1	-5.9	5
MolPort-000-860-909_ZINC000038886872	1	-5.9	1
MolPort-001-739-416_ZINC000031158109	1	-5.9	2
MolPort-000-722-004_ZINC000000140178	1	-5.9	2
MolPort-038-386-696_ZINC000252515033	1	-5.9	4
MolPort-039-052-610_ZINC000032296643	1	-5.9	6
MolPort-015-051-686_ZINC000035410508	1	-5.9	6
MolPort-039-137-790_ZINC000095639162	1	-5.9	11
MolPort-000-707-493_ZINC000000057733	1	-5.9	2
MolPort-038-386-696_ZINC000252515034	1	-5.9	4
MolPort-002-152-929_ZINC000000062003	1	-5.9	4
MolPort-002-846-531_ZINC000000386238	1	-5.8	8
MolPort-001-741-438_ZINC000013377892	1	-5.8	14
MolPort-027-641-528_ZINC000000391163	1	-5.8	1
MolPort-002-510-887_ZINC000004026432	1	-5.8	5
MolPort-002-510-887_ZINC000004026431	1	-5.8	5
MolPort-004-351-030_ZINC000019517335	1	-5.8	3
MolPort-029-943-150_ZINC000225459438	1	-5.8	4
MolPort-006-668-581_ZINC000027550897	1	-5.8	4
MolPort-035-929-946_ZINC000217634484	1	-5.8	2
MolPort-035-929-946_ZINC000242437516	1	-5.8	2
MolPort-003-801-406_ZINC000004087033	1	-5.8	3
MolPort-001-742-468_ZINC000000392595	1	-5.8	0
MolPort-015-051-686_ZINC000035410506	1	-5.8	6
MolPort-001-018-010_ZINC000000083317	1	-5.8	4
MolPort-000-881-224_ZINC000000391177	1	-5.8	1
MolPort-001-739-416_ZINC000031158115	1	-5.8	2
MolPort-002-514-557_ZINC000005024269	1	-5.8	2
MolPort-000-860-909_ZINC000245310068	1	-5.8	1
MolPort-005-944-157_ZINC000004654776	1	-5.8	4
MolPort-003-801-406_ZINC000101025375	1	-5.8	3
MolPort-005-944-340_ZINC000031164787	1	-5.7	5
MolPort-027-835-857_ZINC000085210712	1	-5.7	1
MolPort-003-801-406_ZINC000004087038	1	-5.7	3
MolPort-000-731-552_ZINC000004027640	1	-5.7	5
MolPort-029-943-150_ZINC000248341254	1	-5.7	4
MolPort-005-910-094_ZINC000100779031	1	-5.7	1
MolPort-002-507-443_ZINC000003882002	1	-5.7	5
MolPort-027-835-857_ZINC000043763190	1	-5.7	1
MolPort-002-512-133_ZINC000008762126	1	-5.7	17
MolPort-039-055-606_ZINC000012890604	1	-5.7	3
MolPort-008-644-214_ZINC000038292562	1	-5.7	2
MolPort-003-801-406_ZINC000017111148	1	-5.7	3
MolPort-003-928-475_ZINC000100043983	1	-5.7	0
MolPort-039-055-606_ZINC000253387690	1	-5.7	3
MolPort-001-739-506_ZINC000006522158	1	-5.7	2
MolPort-001-739-865_ZINC000006495303	1	-5.7	2
MolPort-039-052-698_ZINC000095909891	1	-5.7	3
MolPort-039-052-499_ZINC000013545047	1	-5.7	3
MolPort-002-526-868_ZINC000004082037	1	-5.7	4
MolPort-002-507-443_ZINC000003882000	1	-5.6	5
MolPort-027-835-857_ZINC000038611995	1	-5.6	1
MolPort-035-706-002_ZINC000033495916	1	-5.6	1
MolPort-006-668-581_ZINC000015147908	1	-5.6	4
MolPort-002-910-720_ZINC000001041055	1	-5.6	2
MolPort-028-744-631_ZINC000022061424	1	-5.6	4
MolPort-003-801-406_ZINC000002024082	1	-5.6	3
MolPort-002-910-720_ZINC000001041056	1	-5.6	2
MolPort-006-668-581_ZINC000248015794	1	-5.6	4
MolPort-001-741-438_ZINC000013377893	1	-5.6	14
MolPort-039-055-606_ZINC000006624114	1	-5.6	3
MolPort-029-943-150_ZINC000248341256	1	-5.6	4
MolPort-035-706-202_ZINC000014918740	1	-5.6	2
MolPort-036-380-377_ZINC000001841181	1	-5.6	0
MolPort-003-801-406_ZINC000017111150	1	-5.6	3
MolPort-027-641-528_ZINC000004521655	1	-5.5	1
MolPort-002-893-591_ZINC000097994617	1	-5.5	20
MolPort-002-507-443_ZINC000004027278	1	-5.5	5
MolPort-003-855-288_ZINC000000156571	1	-5.5	5
MolPort-000-142-099_ZINC000000136493	1	-5.5	2
MolPort-001-826-678_ZINC000000393724	1	-5.5	4
MolPort-006-128-411_ZINC000005161043	1	-5.5	0
MolPort-002-331-671_ZINC000000391119	1	-5.5	2
MolPort-005-944-340_ZINC000031164791	1	-5.5	5
MolPort-019-937-164_ZINC000049601777	1	-5.5	5
MolPort-039-052-590_ZINC000002039759	1	-5.5	8
MolPort-039-055-606_ZINC000102818320	1	-5.5	3
MolPort-023-278-994_ZINC000040835715	1	-5.5	5
MolPort-000-845-322_ZINC000019701862	1	-5.5	3
MolPort-002-507-443_ZINC000002144927	1	-5.4	5
MolPort-019-931-693_ZINC000014723938	1	-5.4	5
MolPort-008-266-702_ZINC000063772307	1	-5.4	6
MolPort-002-461-958_ZINC000000967176	1	-5.4	0
MolPort-035-706-023_ZINC000040380449	1	-5.4	6
MolPort-002-512-133_ZINC000008762125	1	-5.4	17
MolPort-002-040-840_ZINC000008037260	1	-5.4	2
MolPort-002-746-350_ZINC000000057585	1	-5.4	4
MolPort-035-882-147_ZINC000002390999	1	-5.4	10
MolPort-001-739-251_ZINC000015205786	1	-5.4	7
MolPort-002-816-531_ZINC000000480807	1	-5.4	7
MolPort-000-004-134_ZINC000002390750	1	-5.4	4
MolPort-027-835-857_ZINC000085210711	1	-5.4	1
MolPort-000-142-099_ZINC000004271945	1	-5.4	2
MolPort-002-331-671_ZINC000000391120	1	-5.3	2
MolPort-016-631-409_ZINC000054956948	1	-5.3	1
MolPort-019-931-693_ZINC000014723940	1	-5.3	5
MolPort-016-637-004_ZINC000038343303	1	-5.3	2
MolPort-001-741-612_ZINC000013660067	1	-5.3	4
MolPort-000-845-322_ZINC000000518123	1	-5.3	3
MolPort-039-338-603_ZINC000032162511	1	-5.3	5
MolPort-003-711-128_ZINC000100007513	1	-5.3	1
MolPort-001-742-552_ZINC000100024490	1	-5.3	6
MolPort-035-706-110_ZINC000014588522	1	-5.3	4
MolPort-001-760-542_ZINC000000403038	1	-5.2	4
MolPort-027-713-825_ZINC000005734003	1	-5.2	2
MolPort-035-706-093_ZINC000015274219	1	-5.2	2
MolPort-000-139-474_ZINC000002141018	1	-5.2	0
MolPort-019-931-693_ZINC000014723934	1	-5.2	5
MolPort-039-057-346_ZINC000004083893	1	-5.2	4
MolPort-002-842-502_ZINC000004666928	1	-5.2	2
MolPort-035-881-579_ZINC000032302707	1	-5.2	0
MolPort-016-638-330_ZINC000013533701	1	-5.2	7
MolPort-002-507-443_ZINC000003881999	1	-5.2	5
MolPort-001-789-485_ZINC000001529532	1	-5.2	2
MolPort-003-711-128_ZINC000003897348	1	-5.2	1
MolPort-003-959-981_ZINC000003861537	1	-5.1	2
MolPort-003-959-981_ZINC000004262096	1	-5.1	2
MolPort-000-142-099_ZINC000002556216	1	-5.1	2
MolPort-004-769-026_ZINC000015205584	1	-5.1	2
MolPort-001-759-959_ZINC000000395649	1	-5.1	2
MolPort-003-925-845_ZINC000008580042	1	-5.1	0
MolPort-003-913-783_ZINC000002166531	1	-5.1	9
MolPort-003-913-783_ZINC000002166533	1	-5.1	9
MolPort-002-841-815_ZINC000000384010	1	-5.1	4
MolPort-001-780-273_ZINC000205454665	1	-5.1	6
MolPort-003-905-591_ZINC000004557439	1	-5.1	7
MolPort-001-759-945_ZINC000001597124	1	-5.1	2
MolPort-019-931-693_ZINC000014723936	1	-5.1	5
MolPort-002-816-531_ZINC000000480806	1	-5.1	7
MolPort-001-741-612_ZINC000013660064	1	-5.1	4
MolPort-039-057-346_ZINC000004083895	1	-5	4
MolPort-002-318-703_ZINC000001672860	1	-5	6
MolPort-003-930-593_ZINC000004261954	1	-5	3
MolPort-002-507-076_ZINC000001532712	1	-5	8
MolPort-000-142-099_ZINC000003120705	1	-5	2
MolPort-039-057-346_ZINC000253413457	1	-5	4
MolPort-003-846-210_ZINC000000899004	1	-5	5
MolPort-035-881-579_ZINC000005966484	1	-5	0
MolPort-002-331-671_ZINC000000391121	1	-5	2
MolPort-035-881-579_ZINC000005699435	1	-5	0
MolPort-003-913-783_ZINC000002166535	1	-5	9
MolPort-039-057-346_ZINC000253413458	1	-5	4
MolPort-003-846-210_ZINC000001618046	1	-5	5
MolPort-001-742-552_ZINC000100032893	1	-4.9	6
MolPort-002-910-720_ZINC000001041057	1	-4.9	2
MolPort-002-498-517_ZINC000013527344	1	-4.9	4
MolPort-001-780-273_ZINC000043760965	1	-4.9	6
MolPort-035-881-579_ZINC000005699387	1	-4.9	0
MolPort-002-501-921_ZINC000001699441	1	-4.9	1
MolPort-008-494-192_ZINC000016698018	1	-4.9	5
MolPort-003-913-783_ZINC000002166530	1	-4.9	9
MolPort-000-156-342_ZINC000002522771	1	-4.9	2
MolPort-002-331-671_ZINC000000391118	1	-4.9	2
MolPort-002-506-908_ZINC000001564969	1	-4.8	7
MolPort-003-929-977_ZINC000002013555	1	-4.8	2
MolPort-001-780-273_ZINC000168509414	1	-4.8	6
MolPort-003-846-210_ZINC000002562358	1	-4.8	5
MolPort-003-846-210_ZINC000003794714	1	-4.8	5
MolPort-003-846-210_ZINC000003870515	1	-4.8	5
MolPort-023-314-211_ZINC000101724920	1	-4.8	1
MolPort-003-846-210_ZINC000003870514	1	-4.8	5
MolPort-013-876-676_ZINC000053715299	1	-4.8	2
MolPort-003-846-210_ZINC000013612564	1	-4.8	5
MolPort-003-905-591_ZINC000004557438	1	-4.8	7
MolPort-001-780-273_ZINC000101344509	1	-4.8	6
MolPort-002-910-720_ZINC000001041054	1	-4.8	2
MolPort-002-506-908_ZINC000001564967	1	-4.8	7
MolPort-003-846-210_ZINC000003995890	1	-4.7	5
MolPort-000-871-479_ZINC000001555241	1	-4.7	1
MolPort-023-314-211_ZINC000083255403	1	-4.7	1
MolPort-002-507-076_ZINC000001677289	1	-4.7	8
MolPort-004-959-624_ZINC000004262343	1	-4.7	6
MolPort-001-769-144_ZINC000000388168	1	-4.7	3
MolPort-002-507-076_ZINC000001532722	1	-4.7	8
MolPort-002-506-908_ZINC000001564966	1	-4.6	7
MolPort-008-269-591_ZINC000038804074	1	-4.6	4
MolPort-023-314-211_ZINC000083255401	1	-4.6	1
MolPort-001-780-273_ZINC000002558641	1	-4.6	6
MolPort-023-314-211_ZINC000101724924	1	-4.5	1
MolPort-001-783-101_ZINC000001529819	1	-4.5	5
MolPort-002-506-908_ZINC000101604212	1	-4.5	7
MolPort-001-783-101_ZINC000001529820	1	-4.4	5
MolPort-003-845-148_ZINC000003870710	1	-4.4	6
MolPort-001-784-474_ZINC000000396074	1	-4.4	2
MolPort-000-872-086_ZINC000001648294	1	-4.3	7
MolPort-003-844-548_ZINC000001655433	1	-4.3	4
MolPort-000-153-853_ZINC000000144582	1	-4.3	1
MolPort-008-269-591_ZINC000044075917	1	-4.3	4
