# Supplementary material for: Structure-Based Virtual Screening and Functional Validation of Potential Hit Molecules Targeting the SARS-CoV-2 Main Protease
Source: Biomolecules. 2022 Nov 25;12(12):1754. doi: 10.3390/biom12121754 (PMC9775371; doi:10.3390/biom12121754)
Supplement: Supplementary file 1 [file biomolecules-12-01754-s001.zip › Supplemental_Table_S4.xlsx]

## Sheet: MPro-Ligand pairs in BindingDB
BindingDB Reactant_set_id	Ligand SMILES	Ligand InChI Key	BindingDB Ligand Name	Target Name Assigned by Curator or DataSource	Target Source Organism According to Curator or DataSource	Ki (nM)	IC50 (nM)	Kd (nM)	EC50 (nM)	Article DOI	Link to Ligand-Target Pair in BindingDB	PubChem CID	ChEMBL ID of Ligand	DrugBank ID of Ligand	ZINC ID of Ligand
19474	CCOC(=O)\C=C\[C@H](C[C@@H]1CCNC1=O)NC(=O)[C@H](Cc1ccc(F)cc1)NC(=O)[C@@H](NC(=O)c1cc(C)on1)C(C)C	JSJRYDPMCHPLOL-LTXGZIODSA-N	AG7088 analogue 2a::CHEMBL20636::N-[(5-methylisoxazol-3-yl)carbonyl]-L-valyl-N-((1S,2E)-4-ethoxy-4-oxo-1-{[(3S)-2-oxopyrrolidin-3-yl]methyl}but-2-enyl)-4-fluoro-L-phenylalaninamide::TG-0205221 Analogue 1::ethyl (2E,4S)-4-[(2S)-3-(4-fluorophenyl)-2-[(2S)-3-methyl-2-[(5-methyl-1,2-oxazol-3-yl)formamido]butanamido]propanamido]-5-[(3S)-2-oxopyrrolidin-3-yl]pent-2-enoate	3C-like proteinase (3CL-PRO)	Human SARS coronavirus	>10000				10.1021/jm0603926	http://www.bindingdb.org/jsp/dbsearch/PrimarySearch_ki.jsp?energyterm=kJ/mole&tag=r21&monomerid=11229&enzyme=3C-like+proteinase+%283CL-PRO%29&column=ki&startPg=0&Increment=50&submit=Search	6476897	CHEMBL20636		ZINC14947852
19475	CCOC(=O)\C=C\[C@H](C[C@@H]1CCNC1=O)NC(=O)[C@H](Cc1ccccc1)NC(=O)[C@@H](NC(=O)OCc1ccccc1)C(C)C	MQOSRSSZYUXZNH-XFFCECHOSA-N	AG7088 analogue 2d::CHEMBL277716::N-[(benzyloxy)carbonyl]-L-valyl-N-((1S,2E)-4-ethoxy-4-oxo-1-{[(3S)-2-oxopyrrolidin-3-yl]methyl}but-2-enyl)-L-phenylalaninamide::TG-0205221 Analogue 2::ethyl (2E,4S)-4-[(2S)-2-[(2S)-2-{[(benzyloxy)carbonyl]amino}-3-methylbutanamido]-3-phenylpropanamido]-5-[(3S)-2-oxopyrrolidin-3-yl]pent-2-enoate	3C-like proteinase (3CL-PRO)	Human SARS coronavirus	2260				10.1021/jm0603926	http://www.bindingdb.org/jsp/dbsearch/PrimarySearch_ki.jsp?energyterm=kJ/mole&tag=r21&monomerid=11230&enzyme=3C-like+proteinase+%283CL-PRO%29&column=ki&startPg=0&Increment=50&submit=Search	6478229	CHEMBL277716		ZINC14947855
19476	CCOC(=O)\C=C\[C@H](C[C@@H]1CCNC1=O)NC(=O)[C@H](CC(C)C)NC(=O)[C@@H](NC(=O)OCc1ccccc1)C(C)C	WDMSWWUPIMEGNZ-SGFFKCJDSA-N	N-[(benzyloxy)carbonyl]-L-valyl-N1-((1S,2E)-4-ethoxy-4-oxo-1-{[(3S)-2-oxopyrrolidin-3-yl]methyl}but-2-enyl)-L-leucinamide::TG-0205221 Analogue 3::ethyl (2E,4S)-4-[(2S)-2-[(2S)-2-{[(benzyloxy)carbonyl]amino}-3-methylbutanamido]-4-methylpentanamido]-5-[(3S)-2-oxopyrrolidin-3-yl]pent-2-enoate::peptidomimetic coronavirus 3CLpro inhibitors 3	3C-like proteinase (3CL-PRO)	Human SARS coronavirus	660				10.1021/jm0603926	http://www.bindingdb.org/jsp/dbsearch/PrimarySearch_ki.jsp?energyterm=kJ/mole&tag=r21&monomerid=11231&enzyme=3C-like+proteinase+%283CL-PRO%29&column=ki&startPg=0&Increment=50&submit=Search	11444522			ZINC14947858
19477	CCOC(=O)\C=C\[C@H](C[C@@H]1CCNC1=O)NC(=O)[C@H](CC(C)C)NC(=O)[C@@H](NC(=O)OCc1ccccc1)C(C)OC(C)(C)C	PWBQMVUCCVWDEJ-YVSZZSSPSA-N	N-[(benzyloxy)carbonyl]-O-(tert-butyl)-L-threonyl-N1-((1S,2E)-4-ethoxy-4-oxo-1-{[(3S)-2-oxopyrrolidin-3-yl]methyl}but-2-enyl)-L-leucinamide::TG-0203770::TG-0205221 Analogue 4::ethyl (2E,4S)-4-[(2S)-2-[(2S,3S)-2-{[(benzyloxy)carbonyl]amino}-3-(tert-butoxy)butanamido]-4-methylpentanamido]-5-[(3S)-2-oxopyrrolidin-3-yl]pent-2-enoate	3C-like proteinase (3CL-PRO)	Human SARS coronavirus	58				10.1021/jm0603926	http://www.bindingdb.org/jsp/dbsearch/PrimarySearch_ki.jsp?energyterm=kJ/mole&tag=r21&monomerid=11232&enzyme=3C-like+proteinase+%283CL-PRO%29&column=ki&startPg=0&Increment=50&submit=Search	11786957			ZINC14947865
19478	C[C@H](OC(C)(C)C)[C@H](NC(=O)OCc1ccccc1)C(=O)N[C@@H](CC1CCCCC1)C(=O)N[C@@H](C[C@@H]1CCNC1=O)C=O	YFUZVOLEKQFVCQ-SJSXQSQASA-N	N-[(benzyloxy)carbonyl]-O-(tert-butyl)-L-threonyl-3-cyclohexyl-N1-{(1S)-1-formyl-2-[(3S)-2-oxopyrrolidin-3-yl]ethyl}-L-alaninamide::TG-0205221::benzyl N-[(1S,2S)-2-(tert-butoxy)-1-{[(1S)-2-cyclohexyl-1-{[(2S)-1-oxo-3-[(3S)-2-oxopyrrolidin-3-yl]propan-2-yl]carbamoyl}ethyl]carbamoyl}propyl]carbamate	3C-like proteinase (3CL-PRO)	Human SARS coronavirus	53				10.1021/jm0603926	http://www.bindingdb.org/jsp/dbsearch/PrimarySearch_ki.jsp?energyterm=kJ/mole&tag=r21&monomerid=11233&enzyme=3C-like+proteinase+%283CL-PRO%29&column=ki&startPg=0&Increment=50&submit=Search	91895789			ZINC14947873
19479	CN(C)c1ccc(cc1)C(=O)N[C@@H](Cc1ccccc1)C(=O)Nc1ccc(cc1Cl)[N+]([O-])=O	NBBWJEWPUKPHPZ-QFIPXVFZSA-N	(2S)-N-(2-chloro-4-nitrophenyl)-2-{[4-(dimethylamino)phenyl]formamido}-3-phenylpropanamide::Anilide Inhibitor 2a::N-(2-chloro-4-nitrophenyl)-N-[4-(dimethylamino)benzoyl]-L-phenylalaninamide::med.21724, Compound 77	3C-like proteinase (3CL-PRO)	Human SARS coronavirus	30	60			10.1021/jm050184y	http://www.bindingdb.org/jsp/dbsearch/PrimarySearch_ki.jsp?energyterm=kJ/mole&tag=r21&monomerid=11234&enzyme=3C-like+proteinase+%283CL-PRO%29&column=ki&startPg=0&Increment=50&submit=Search	11317290			ZINC13646492
19480	CC(C)C[C@H](NC(=O)[C@@H](NC(=O)OC(C)(C)C)C(C)C)C(=O)N[C@@H](Cc1ccccc1)C(=O)Nc1ccc(cc1Cl)[N+]([O-])=O	ONKANJYUPWHECL-GSDHBNRESA-N	Anilide Inhibitor 3d::tert-butyl N-[(1S)-1-{[(1S)-1-{[(1S)-1-[(2-chloro-4-nitrophenyl)carbamoyl]-2-phenylethyl]carbamoyl}-3-methylbutyl]carbamoyl}-2-methylpropyl]carbamate	3C-like proteinase (3CL-PRO)	Human SARS coronavirus		>10000			10.1021/jm050184y	http://www.bindingdb.org/jsp/dbsearch/PrimarySearch_ki.jsp?energyterm=kJ/mole&tag=r21&monomerid=11235&enzyme=3C-like+proteinase+%283CL-PRO%29&column=ki&startPg=0&Increment=50&submit=Search	11262151			ZINC14947878
19481	CC(C)C[C@H](NC(=O)[C@@H](NC(=O)c1cccs1)C(C)C)C(=O)N[C@@H](Cc1ccccc1)C(=O)Nc1ccc(cc1Cl)[N+]([O-])=O	BOBHTKXBEGQHHJ-KLJDGLGGSA-N	(2S)-N-[(1S)-1-[(2-chloro-4-nitrophenyl)carbamoyl]-2-phenylethyl]-4-methyl-2-[(2S)-3-methyl-2-(thiophen-2-ylformamido)butanamido]pentanamide::Anilide Inhibitor 3h::N-(thien-2-ylcarbonyl)-L-valyl-L-leucyl-N-(2-chloro-4-nitrophenyl)-L-phenylalaninamide	3C-like proteinase (3CL-PRO)	Human SARS coronavirus	2290	5000			10.1021/jm050184y	http://www.bindingdb.org/jsp/dbsearch/PrimarySearch_ki.jsp?energyterm=kJ/mole&tag=r21&monomerid=11236&enzyme=3C-like+proteinase+%283CL-PRO%29&column=ki&startPg=0&Increment=50&submit=Search	11467858			ZINC28472765
19482	CC(C)C(NC(=O)c1cc(C)[o+][n-]1)C(=O)NC(Cc1ccccc1)C(=O)NC(Cc1ccccc1)C(=O)Nc1ccc(cc1Cl)[N+]([O-])=O	SHBMVTFCFMSMCY-UHFFFAOYSA-N	(2S)-N-[(1S)-1-{[(1S)-1-[(2-chloro-4-nitrophenyl)carbamoyl]-2-phenylethyl]carbamoyl}-2-phenylethyl]-3-methyl-2-[(5-methyl-1,2-oxazol-3-yl)formamido]butanamide::Anilide Inhibitor 3o::N-[(5-methylisoxazol-3-yl)carbonyl]-L-valyl-L-phenylalanyl-N-(2-chloro-4-nitrophenyl)-L-phenylalaninamide	3C-like proteinase (3CL-PRO)	Human SARS coronavirus	2900	7000			10.1021/jm050184y	http://www.bindingdb.org/jsp/dbsearch/PrimarySearch_ki.jsp?energyterm=kJ/mole&tag=r21&monomerid=11237&enzyme=3C-like+proteinase+%283CL-PRO%29&column=ki&startPg=0&Increment=50&submit=Search	85426836			ZINC96210335
19483	CC(C)[C@H](NC(=O)c1cccs1)C(=O)N[C@@H](Cc1ccccc1)C(=O)N[C@@H](Cc1ccccc1)C(=O)Nc1ccc(cc1Cl)[N+]([O-])=O	NOUWGKBFWDKEIW-XEVVZDEMSA-N	(2S)-N-[(1S)-1-{[(1S)-1-[(2-chloro-4-nitrophenyl)carbamoyl]-2-phenylethyl]carbamoyl}-2-phenylethyl]-3-methyl-2-(thiophen-2-ylformamido)butanamide::Anilide Inhibitor 3p::N-(thien-2-ylcarbonyl)-L-valyl-L-phenylalanyl-N-(2-chloro-4-nitrophenyl)-L-phenylalaninamide	3C-like proteinase (3CL-PRO)	Human SARS coronavirus	4300	5000			10.1021/jm050184y	http://www.bindingdb.org/jsp/dbsearch/PrimarySearch_ki.jsp?energyterm=kJ/mole&tag=r21&monomerid=11238&enzyme=3C-like+proteinase+%283CL-PRO%29&column=ki&startPg=0&Increment=50&submit=Search	11227702			ZINC28469361
19484	CC(C)[C@H](NC(=O)c1cc(C)on1)C(=O)N[C@@H](Cc1ccccc1)C(=O)N[C@@H](C(C)O)C(=O)N[C@@H](Cc1ccccc1)C(=O)Nc1ccc(cc1Cl)[N+]([O-])=O	GGJACBVAQGGMCL-AUAZBNJCSA-N	(2S)-N-[(1S)-1-{[(1S,2S)-1-{[(1S)-1-[(2-chloro-4-nitrophenyl)carbamoyl]-2-phenylethyl]carbamoyl}-2-hydroxypropyl]carbamoyl}-2-phenylethyl]-3-methyl-2-[(5-methyl-1,2-oxazol-3-yl)formamido]butanamide::Anilide Inhibitor 4j::N-[(5-methylisoxazol-3-yl)carbonyl]-L-valyl-L-phenylalanyl-L-threonyl-N-(2-chloro-4-nitrophenyl)-L-phenylalaninamide	3C-like proteinase (3CL-PRO)	Human SARS coronavirus	1610	5000			10.1021/jm050184y	http://www.bindingdb.org/jsp/dbsearch/PrimarySearch_ki.jsp?energyterm=kJ/mole&tag=r21&monomerid=11239&enzyme=3C-like+proteinase+%283CL-PRO%29&column=ki&startPg=0&Increment=50&submit=Search	15959316			ZINC96210342
19485	CC(C)[C@H](NC(=O)OCc1ccccc1)C(=O)N[C@@H](Cc1ccccc1)C(=O)N[C@@H](C(C)O)C(=O)N[C@@H](Cc1ccccc1)C(=O)Nc1ccc(cc1Cl)[N+]([O-])=O	GVHOYMBPDIKJRB-BLIYAOACSA-N	Anilide Inhibitor 4k::N-[(benzyloxy)carbonyl]-L-valyl-L-phenylalanyl-L-threonyl-N-(2-chloro-4-nitrophenyl)-L-phenylalaninamide::benzyl N-[(1S)-1-{[(1S)-1-{[(1S,2S)-1-{[(1S)-1-[(2-chloro-4-nitrophenyl)carbamoyl]-2-phenylethyl]carbamoyl}-2-hydroxypropyl]carbamoyl}-2-phenylethyl]carbamoyl}-2-methylpropyl]carbamate	3C-like proteinase (3CL-PRO)	Human SARS coronavirus	1510	6000			10.1021/jm050184y	http://www.bindingdb.org/jsp/dbsearch/PrimarySearch_ki.jsp?energyterm=kJ/mole&tag=r21&monomerid=11240&enzyme=3C-like+proteinase+%283CL-PRO%29&column=ki&startPg=0&Increment=50&submit=Search	15959317			ZINC95612354
19486	O[C@@H](CC(=O)N[C@@H](Cc1ccccc1)C(=O)Nc1ccc(cc1Cl)[N+]([O-])=O)C(=O)N[C@@H](Cc1ccccc1)C(=O)Nc1ccc(cc1Cl)[N+]([O-])=O	FCKXGFANXSHGAW-DTXPUJKBSA-N	(2S)-N,N'-bis[(1S)-1-[(2-chloro-4-nitrophenyl)carbamoyl]-2-phenylethyl]-2-hydroxybutanediamide::Anilide Inhibitor 5b::Bis-anilide	3C-like proteinase (3CL-PRO)	Human SARS coronavirus	3100	4000			10.1021/jm050184y	http://www.bindingdb.org/jsp/dbsearch/PrimarySearch_ki.jsp?energyterm=kJ/mole&tag=r21&monomerid=11241&enzyme=3C-like+proteinase+%283CL-PRO%29&column=ki&startPg=0&Increment=50&submit=Search	11491101			ZINC95606624
19487	Oc1ccc(Cl)cc1C(=O)Nc1ccc(cc1Cl)[N+]([O-])=O	RJMUSRYZPJIFPJ-UHFFFAOYSA-N	5-chloro-N-(2-chloro-4-nitrophenyl)-2-hydroxybenzamide::med.21724, Compound 76::niclosamide	3C-like proteinase (3CL-PRO)	Human SARS coronavirus		>50000			10.1021/jm050184y	http://www.bindingdb.org/jsp/dbsearch/PrimarySearch_ki.jsp?energyterm=kJ/mole&tag=r21&monomerid=11242&enzyme=3C-like+proteinase+%283CL-PRO%29&column=ki&startPg=0&Increment=50&submit=Search	4477		DB06803	ZINC03874496
19488	CCOC(=O)\C=C\[C@H](C[C@@H]1CCNC1=O)NC(=O)[C@@H](CC(=O)[C@@H](NC(=O)c1cc(C)on1)C(C)C)Cc1ccc(F)cc1	CAYJBRBGZBCZKO-BHGBQCOSSA-N	AG7088::CHEMBL20210::ethyl (2E,4S)-4-[((2R,5S)-2-(4-fluorobenzyl)-6-methyl-5-{[(5-methylisoxazol-3-yl)carbonyl]amino}-4-oxoheptanoyl)amino]-5-[(3S)-2-oxopyrrolidin-3-yl]pent-2-enoate::ethyl (2E,4S)-4-[(2R,5S)-2-[(4-fluorophenyl)methyl]-6-methyl-5-[(5-methyl-1,2-oxazol-3-yl)formamido]-4-oxoheptanamido]-5-[(3S)-2-oxopyrrolidin-3-yl]pent-2-enoate::med.21724, Compound 29	3C-like proteinase (3CL-PRO)	Human SARS coronavirus		>100000			10.1016/j.bmc.2005.05.065	http://www.bindingdb.org/jsp/dbsearch/PrimarySearch_ki.jsp?energyterm=kJ/mole&tag=r21&monomerid=11243&enzyme=3C-like+proteinase+%283CL-PRO%29&column=ki&startPg=0&Increment=50&submit=Search	6440352	CHEMBL20210	DB05102	ZINC03919807
19489	CCOC(=O)\C=C\[C@H](C[C@@H]1CCNC1=O)NC(=O)[C@@H](CC(=O)[C@@H](NC(=O)OCc1ccccc1)C(C)C)Cc1ccc(F)cc1	NPKSFKZRNUBNHK-JNOQTPQISA-N	AG7088 analogue 1b::ethyl (2E,4S)-4-[(2R,5S)-5-{[(benzyloxy)carbonyl]amino}-2-[(4-fluorophenyl)methyl]-6-methyl-4-oxoheptanamido]-5-[(3S)-2-oxopyrrolidin-3-yl]pent-2-enoate	3C-like proteinase (3CL-PRO)	Human SARS coronavirus		>100000			10.1016/j.bmc.2005.05.065	http://www.bindingdb.org/jsp/dbsearch/PrimarySearch_ki.jsp?energyterm=kJ/mole&tag=r21&monomerid=11244&enzyme=3C-like+proteinase+%283CL-PRO%29&column=ki&startPg=0&Increment=50&submit=Search	15959291			ZINC14947882
19490	CCOC(=O)\C=C\[C@H](C[C@@H]1CCNC1=O)NC(=O)[C@@H](CC(=O)[C@@H](NC(=O)c1cc(C)on1)C(C)C)Cc1ccccc1	DHTSLDPANDNYNQ-SJNZOZTPSA-N	AG7088 analogue 1c::CHEMBL194398::ethyl (2E,4S)-4-[(2R,5S)-2-benzyl-6-methyl-5-[(5-methyl-1,2-oxazol-3-yl)formamido]-4-oxoheptanamido]-5-[(3S)-2-oxopyrrolidin-3-yl]pent-2-enoate	3C-like proteinase (3CL-PRO)	Human SARS coronavirus		>100000			10.1016/j.bmc.2005.05.065	http://www.bindingdb.org/jsp/dbsearch/PrimarySearch_ki.jsp?energyterm=kJ/mole&tag=r21&monomerid=11245&enzyme=3C-like+proteinase+%283CL-PRO%29&column=ki&startPg=0&Increment=50&submit=Search	11642725	CHEMBL194398		ZINC14947885
19491	CCOC(=O)\C=C\[C@H](C[C@@H]1CCNC1=O)NC(=O)[C@@H](CC(=O)[C@@H](NC(=O)OCc1ccccc1)C(C)C)Cc1ccccc1	NNUSBUJYBPVXNX-MPJJSOSNSA-N	AG7088 analogue 1d::ethyl (2E,4S)-4-[(2R,5S)-2-benzyl-5-{[(benzyloxy)carbonyl]amino}-6-methyl-4-oxoheptanamido]-5-[(3S)-2-oxopyrrolidin-3-yl]pent-2-enoate::med.21724, Compound 36	3C-like proteinase (3CL-PRO)	Human SARS coronavirus		>100000			10.1016/j.bmc.2005.05.065	http://www.bindingdb.org/jsp/dbsearch/PrimarySearch_ki.jsp?energyterm=kJ/mole&tag=r21&monomerid=11246&enzyme=3C-like+proteinase+%283CL-PRO%29&column=ki&startPg=0&Increment=50&submit=Search	15959292			ZINC14947888
19492	CCOC(=O)\C=C\[C@H](C[C@@H]1CCNC1=O)NC(=O)[C@H](Cc1ccc(F)cc1)NC(=O)[C@@H](NC(=O)c1cc(C)on1)C(C)C	JSJRYDPMCHPLOL-LTXGZIODSA-N	AG7088 analogue 2a::CHEMBL20636::N-[(5-methylisoxazol-3-yl)carbonyl]-L-valyl-N-((1S,2E)-4-ethoxy-4-oxo-1-{[(3S)-2-oxopyrrolidin-3-yl]methyl}but-2-enyl)-4-fluoro-L-phenylalaninamide::TG-0205221 Analogue 1::ethyl (2E,4S)-4-[(2S)-3-(4-fluorophenyl)-2-[(2S)-3-methyl-2-[(5-methyl-1,2-oxazol-3-yl)formamido]butanamido]propanamido]-5-[(3S)-2-oxopyrrolidin-3-yl]pent-2-enoate	3C-like proteinase (3CL-PRO)	Human SARS coronavirus		>100000			10.1016/j.bmc.2005.05.065	http://www.bindingdb.org/jsp/dbsearch/PrimarySearch_ki.jsp?energyterm=kJ/mole&tag=r21&monomerid=11229&enzyme=3C-like+proteinase+%283CL-PRO%29&column=ki&startPg=0&Increment=50&submit=Search	6476897	CHEMBL20636		ZINC14947852
19493	CCOC(=O)\C=C\[C@H](C[C@@H]1CCNC1=O)NC(=O)[C@H](Cc1ccc(F)cc1)NC(=O)[C@@H](NC(=O)OCc1ccccc1)C(C)C	DPLBSAHOVYLEQM-GNDHVGONSA-N	AG7088 analogue 2b::ethyl (2E,4S)-4-[(2S)-2-[(2S)-2-{[(benzyloxy)carbonyl]amino}-3-methylbutanamido]-3-(4-fluorophenyl)propanamido]-5-[(3S)-2-oxopyrrolidin-3-yl]pent-2-enoate	3C-like proteinase (3CL-PRO)	Human SARS coronavirus		>100000			10.1016/j.bmc.2005.05.065	http://www.bindingdb.org/jsp/dbsearch/PrimarySearch_ki.jsp?energyterm=kJ/mole&tag=r21&monomerid=11248&enzyme=3C-like+proteinase+%283CL-PRO%29&column=ki&startPg=0&Increment=50&submit=Search	15959293			ZINC14947892
19494	CCOC(=O)\C=C\[C@H](C[C@@H]1CCNC1=O)NC(=O)[C@H](Cc1ccccc1)NC(=O)[C@@H](NC(=O)c1cc(C)on1)C(C)C	PANGWSCMXDVPFP-BNQYSQCVSA-N	AG7088 analogue 2c::ethyl (2E,4S)-4-[(2S)-2-[(2S)-3-methyl-2-[(5-methyl-1,2-oxazol-3-yl)formamido]butanamido]-3-phenylpropanamido]-5-[(3S)-2-oxopyrrolidin-3-yl]pent-2-enoate	3C-like proteinase (3CL-PRO)	Human SARS coronavirus		80000			10.1016/j.bmc.2005.05.065	http://www.bindingdb.org/jsp/dbsearch/PrimarySearch_ki.jsp?energyterm=kJ/mole&tag=r21&monomerid=11249&enzyme=3C-like+proteinase+%283CL-PRO%29&column=ki&startPg=0&Increment=50&submit=Search	15956553			ZINC14947896
19495	CCOC(=O)\C=C\[C@H](C[C@@H]1CCNC1=O)NC(=O)[C@H](Cc1ccccc1)NC(=O)[C@@H](NC(=O)OCc1ccccc1)C(C)C	MQOSRSSZYUXZNH-XFFCECHOSA-N	AG7088 analogue 2d::CHEMBL277716::N-[(benzyloxy)carbonyl]-L-valyl-N-((1S,2E)-4-ethoxy-4-oxo-1-{[(3S)-2-oxopyrrolidin-3-yl]methyl}but-2-enyl)-L-phenylalaninamide::TG-0205221 Analogue 2::ethyl (2E,4S)-4-[(2S)-2-[(2S)-2-{[(benzyloxy)carbonyl]amino}-3-methylbutanamido]-3-phenylpropanamido]-5-[(3S)-2-oxopyrrolidin-3-yl]pent-2-enoate	3C-like proteinase (3CL-PRO)	Human SARS coronavirus		85000			10.1016/j.bmc.2005.05.065	http://www.bindingdb.org/jsp/dbsearch/PrimarySearch_ki.jsp?energyterm=kJ/mole&tag=r21&monomerid=11230&enzyme=3C-like+proteinase+%283CL-PRO%29&column=ki&startPg=0&Increment=50&submit=Search	6478229	CHEMBL277716		ZINC14947855
19496	CCOC(=O)\C=C\[C@H](Cc1ccccc1)NC(=O)[C@@H](CC(=O)[C@@H](NC(=O)c1cc(C)on1)C(C)C)Cc1ccc(F)cc1	FCVVBRNWNKLOCV-YLJIJCFQSA-N	AG7088 analogue 3a::ethyl (2E,4S)-4-[(2R,5S)-2-[(4-fluorophenyl)methyl]-6-methyl-5-[(5-methyl-1,2-oxazol-3-yl)formamido]-4-oxoheptanamido]-5-phenylpent-2-enoate	3C-like proteinase (3CL-PRO)	Human SARS coronavirus		39000			10.1016/j.bmc.2005.05.065	http://www.bindingdb.org/jsp/dbsearch/PrimarySearch_ki.jsp?energyterm=kJ/mole&tag=r21&monomerid=11251&enzyme=3C-like+proteinase+%283CL-PRO%29&column=ki&startPg=0&Increment=50&submit=Search	15959294			ZINC14947899
19497	CCOC(=O)\C=C\[C@H](Cc1ccccc1)NC(=O)[C@@H](CC(=O)[C@@H](NC(=O)OCc1ccccc1)C(C)C)Cc1ccc(F)cc1	NZBCTRXETOVYTR-UWXODDEOSA-N	AG7088 analogue 3b::ethyl (2E,4S)-4-[(2R,5S)-5-{[(benzyloxy)carbonyl]amino}-2-[(4-fluorophenyl)methyl]-6-methyl-4-oxoheptanamido]-5-phenylpent-2-enoate	3C-like proteinase (3CL-PRO)	Human SARS coronavirus		31000			10.1016/j.bmc.2005.05.065	http://www.bindingdb.org/jsp/dbsearch/PrimarySearch_ki.jsp?energyterm=kJ/mole&tag=r21&monomerid=11252&enzyme=3C-like+proteinase+%283CL-PRO%29&column=ki&startPg=0&Increment=50&submit=Search	15959295			ZINC14947903
19498	CCOC(=O)\C=C\[C@H](Cc1ccccc1)NC(=O)[C@@H](CC(=O)[C@@H](NC(=O)c1cc(C)on1)C(C)C)Cc1ccccc1	ZNJXQWIARYSQOT-INZYYWFGSA-N	AG7088 analogue 3c::ethyl (2E,4S)-4-[(2R,5S)-2-benzyl-6-methyl-5-[(5-methyl-1,2-oxazol-3-yl)formamido]-4-oxoheptanamido]-5-phenylpent-2-enoate::jm5b01461, Compound 5	3C-like proteinase (3CL-PRO)	Human SARS coronavirus		13000			10.1016/j.bmc.2005.05.065	http://www.bindingdb.org/jsp/dbsearch/PrimarySearch_ki.jsp?energyterm=kJ/mole&tag=r21&monomerid=11253&enzyme=3C-like+proteinase+%283CL-PRO%29&column=ki&startPg=0&Increment=50&submit=Search	15959296			ZINC14947906
19499	CCOC(=O)\C=C\[C@H](Cc1ccccc1)NC(=O)[C@@H](CC(=O)[C@@H](NC(=O)OCc1ccccc1)C(C)C)Cc1ccccc1	DUDXNMNSLLNROX-WXWPSNGTSA-N	AG7088 analogue 3d::ethyl (2E,4S)-4-[(2R,5S)-2-benzyl-5-{[(benzyloxy)carbonyl]amino}-6-methyl-4-oxoheptanamido]-5-phenylpent-2-enoate	3C-like proteinase (3CL-PRO)	Human SARS coronavirus		38000			10.1016/j.bmc.2005.05.065	http://www.bindingdb.org/jsp/dbsearch/PrimarySearch_ki.jsp?energyterm=kJ/mole&tag=r21&monomerid=11254&enzyme=3C-like+proteinase+%283CL-PRO%29&column=ki&startPg=0&Increment=50&submit=Search	15959297			ZINC14947909
19500	CCOC(=O)\C=C\[C@H](Cc1ccccc1)NC(=O)[C@H](Cc1ccc(F)cc1)NC(=O)[C@@H](NC(=O)c1cc(C)on1)C(C)C	MRDHFZJRJNYFNI-WADMKTPGSA-N	AG7088 analogue 4a::ethyl (2E,4S)-4-[(2S)-3-(4-fluorophenyl)-2-[(2S)-3-methyl-2-[(5-methyl-1,2-oxazol-3-yl)formamido]butanamido]propanamido]-5-phenylpent-2-enoate::jm5b01461, Compound 4	3C-like proteinase (3CL-PRO)	Human SARS coronavirus		21000			10.1016/j.bmc.2005.05.065	http://www.bindingdb.org/jsp/dbsearch/PrimarySearch_ki.jsp?energyterm=kJ/mole&tag=r21&monomerid=11255&enzyme=3C-like+proteinase+%283CL-PRO%29&column=ki&startPg=0&Increment=50&submit=Search	15959298			ZINC14947912
19501	CCOC(=O)\C=C\[C@H](Cc1ccccc1)NC(=O)[C@H](Cc1ccc(F)cc1)NC(=O)[C@@H](NC(=O)OCc1ccccc1)C(C)C	VFODSYFBKHPECI-LFILEMNHSA-N	AG7088 analogue 4b::ethyl (2E,4S)-4-[(2S)-2-[(2S)-2-{[(benzyloxy)carbonyl]amino}-3-methylbutanamido]-3-(4-fluorophenyl)propanamido]-5-phenylpent-2-enoate	3C-like proteinase (3CL-PRO)	Human SARS coronavirus		11000			10.1016/j.bmc.2005.05.065	http://www.bindingdb.org/jsp/dbsearch/PrimarySearch_ki.jsp?energyterm=kJ/mole&tag=r21&monomerid=11256&enzyme=3C-like+proteinase+%283CL-PRO%29&column=ki&startPg=0&Increment=50&submit=Search	15959299			ZINC14947915
19502	CCOC(=O)\C=C\[C@H](Cc1ccccc1)NC(=O)[C@H](Cc1ccccc1)NC(=O)[C@@H](NC(=O)c1cc(C)on1)C(C)C	DECFOJTYZGEZPC-RWBCRXJQSA-N	AG7088 analogue 4c::ethyl (2E,4S)-4-[(2S)-2-[(2S)-3-methyl-2-[(5-methyl-1,2-oxazol-3-yl)formamido]butanamido]-3-phenylpropanamido]-5-phenylpent-2-enoate	3C-like proteinase (3CL-PRO)	Human SARS coronavirus		30000			10.1016/j.bmc.2005.05.065	http://www.bindingdb.org/jsp/dbsearch/PrimarySearch_ki.jsp?energyterm=kJ/mole&tag=r21&monomerid=11257&enzyme=3C-like+proteinase+%283CL-PRO%29&column=ki&startPg=0&Increment=50&submit=Search	15959300			ZINC14947918
19503	CCOC(=O)\C=C\[C@H](Cc1ccccc1)NC(=O)[C@H](Cc1ccccc1)NC(=O)[C@@H](NC(=O)OCc1ccccc1)C(C)C	XGWDTJNPAMPMIY-ZYXAYCJJSA-N	AG7088 analogue 4d::ethyl (2E,4S)-4-[(2S)-2-[(2S)-2-{[(benzyloxy)carbonyl]amino}-3-methylbutanamido]-3-phenylpropanamido]-5-phenylpent-2-enoate	3C-like proteinase (3CL-PRO)	Human SARS coronavirus		11000			10.1016/j.bmc.2005.05.065	http://www.bindingdb.org/jsp/dbsearch/PrimarySearch_ki.jsp?energyterm=kJ/mole&tag=r21&monomerid=11258&enzyme=3C-like+proteinase+%283CL-PRO%29&column=ki&startPg=0&Increment=50&submit=Search	15959301			ZINC14947921
19504	CCOC(=O)\C=C\[C@H](Cc1ccccc1)NC(=O)[C@H](Cc1ccccc1)NC(=O)\C=C\c1ccc(cc1)-c1ccccc1	PQFVYUJGFLSMKA-PFKUUMJMSA-N	dipeptidomimetic unsaturated ester 18a::ethyl (2E,4S)-4-({N-[(2E)-3-(1,1-biphenyl-4-yl)prop-2-enoyl]-L-phenylalanyl}amino)-5-phenylpent-2-enoate::ethyl (2E,4S)-5-phenyl-4-[(2S)-3-phenyl-2-[(2E)-3-(4-phenylphenyl)prop-2-enamido]propanamido]pent-2-enoate::jm5b01461, Compound 6	3C-like proteinase (3CL-PRO)	Human SARS coronavirus	6440	10000			10.1016/j.bmc.2005.05.065	http://www.bindingdb.org/jsp/dbsearch/PrimarySearch_ki.jsp?energyterm=kJ/mole&tag=r21&monomerid=11259&enzyme=3C-like+proteinase+%283CL-PRO%29&column=ki&startPg=0&Increment=50&submit=Search	15959302			ZINC14947924
19505	CCOC(=O)\C=C\[C@H](Cc1ccccc1)NC(=O)[C@H](Cc1ccccc1)NC(=O)\C=C\c1ccc(cc1)N(=O)=O	XAYRYKDJTCRRDA-FGOHTXDJSA-N	dipeptidomimetic unsaturated ester 18b::ethyl (2E,4S)-4-({N-[(2E)-3-(4-nitrophenyl)prop-2-enoyl]-L-phenylalanyl}amino)-5-phenylpent-2-enoate::ethyl (2E,4S)-4-[(2S)-2-[(2E)-3-(4-nitrophenyl)prop-2-enamido]-3-phenylpropanamido]-5-phenylpent-2-enoate	3C-like proteinase (3CL-PRO)	Human SARS coronavirus	2480	5000			10.1016/j.bmc.2005.05.065	http://www.bindingdb.org/jsp/dbsearch/PrimarySearch_ki.jsp?energyterm=kJ/mole&tag=r21&monomerid=11260&enzyme=3C-like+proteinase+%283CL-PRO%29&column=ki&startPg=0&Increment=50&submit=Search	15959303			ZINC14947927
19506	CCOC(=O)\C=C\[C@H](Cc1ccccc1)NC(=O)[C@H](Cc1ccccc1)NC(=O)\C=C\c1ccc(cc1)N(C)C	JWPLKCWYGMPRGX-ZIIPDIQWSA-N	dipeptidomimetic unsaturated ester 18c::ethyl (2E,4S)-4-[(2S)-2-[(2E)-3-[4-(dimethylamino)phenyl]prop-2-enamido]-3-phenylpropanamido]-5-phenylpent-2-enoate::ethyl (2E,4S)-4-[(N-{(2E)-3-[4-(dimethylamino)phenyl]prop-2-enoyl}-L-phenylalanyl)amino]-5-phenylpent-2-enoate::med.21724, Compound 39	3C-like proteinase (3CL-PRO)	Human SARS coronavirus	520	1000			10.1016/j.bmc.2005.05.065	http://www.bindingdb.org/jsp/dbsearch/PrimarySearch_ki.jsp?energyterm=kJ/mole&tag=r21&monomerid=11261&enzyme=3C-like+proteinase+%283CL-PRO%29&column=ki&startPg=0&Increment=50&submit=Search	11555658			ZINC14947930
19507	CCOC(=O)\C=C\[C@H](Cc1ccccc1)NC(=O)[C@H](Cc1ccccc1)NC(=O)\C=C\c1ccc(OC)cc1OC	ACACSUQRMWRCPB-FUNSLCGPSA-N	dipeptidomimetic unsaturated ester 18d::ethyl (2E,4S)-4-({N-[(2E)-3-(2,4-dimethoxyphenyl)prop-2-enoyl]-L-phenylalanyl}amino)-5-phenylpent-2-enoate::ethyl (2E,4S)-4-[(2S)-2-[(2E)-3-(2,4-dimethoxyphenyl)prop-2-enamido]-3-phenylpropanamido]-5-phenylpent-2-enoate::jm5b01461, Compound 9	3C-like proteinase (3CL-PRO)	Human SARS coronavirus	9049	10000			10.1016/j.bmc.2005.05.065	http://www.bindingdb.org/jsp/dbsearch/PrimarySearch_ki.jsp?energyterm=kJ/mole&tag=r21&monomerid=11262&enzyme=3C-like+proteinase+%283CL-PRO%29&column=ki&startPg=0&Increment=50&submit=Search	15959304			ZINC14947933
19508	CCOC(=O)\C=C\[C@H](Cc1ccccc1)NC(=O)[C@H](Cc1ccccc1)NC(=O)\C=C\c1ccc2OCOc2c1	PQLARAJPSQMPIR-PKDKPTJCSA-N	dipeptidomimetic unsaturated ester 18e::ethyl (2E,4S)-4-({N-[(2E)-3-(1,3-benzodioxol-5-yl)prop-2-enoyl]-L-phenylalanyl}amino)-5-phenylpent-2-enoate::ethyl (2E,4S)-4-[(2S)-2-[(2E)-3-(2H-1,3-benzodioxol-5-yl)prop-2-enamido]-3-phenylpropanamido]-5-phenylpent-2-enoate	3C-like proteinase (3CL-PRO)	Human SARS coronavirus	3046	7000			10.1016/j.bmc.2005.05.065	http://www.bindingdb.org/jsp/dbsearch/PrimarySearch_ki.jsp?energyterm=kJ/mole&tag=r21&monomerid=11263&enzyme=3C-like+proteinase+%283CL-PRO%29&column=ki&startPg=0&Increment=50&submit=Search	23645527			ZINC14947936
19509	Clc1cc(Cl)cc(NC(=O)CSc2nccc(n2)-c2csc(n2)-c2ccccc2)c1	LILOEJREEQFTPM-UHFFFAOYSA-N	N-(3,5-dichlorophenyl)-2-{[4-(2-phenyl-1,3-thiazol-4-yl)pyrimidin-2-yl]sulfanyl}acetamide::jm5b01461, Compound 105::pyrimidine-containing compound 1	3C-like proteinase (3CL-PRO)	Human SARS coronavirus		3000			10.1021/jm050852f	http://www.bindingdb.org/jsp/dbsearch/PrimarySearch_ki.jsp?energyterm=kJ/mole&tag=r21&monomerid=11264&enzyme=3C-like+proteinase+%283CL-PRO%29&column=ki&startPg=0&Increment=50&submit=Search	2744814			ZINC01047806
19510	Cn1nc(cc1C(F)(F)F)-c1ccc(s1)-c1ccnc(SCC(=O)Nc2ccc(Cl)cc2)n1	AWQBIBTZJKFLEW-UHFFFAOYSA-N	N-(4-chlorophenyl)-2-[(4-{5-[1-methyl-5-(trifluoromethyl)-1H-pyrazol-3-yl]thiophen-2-yl}pyrimidin-2-yl)sulfanyl]acetamide::jm5b01461, Compound 106::pyrimidine-containing compound 2	3C-like proteinase (3CL-PRO)	Human SARS coronavirus		10000			10.1021/jm050852f	http://www.bindingdb.org/jsp/dbsearch/PrimarySearch_ki.jsp?energyterm=kJ/mole&tag=r21&monomerid=11265&enzyme=3C-like+proteinase+%283CL-PRO%29&column=ki&startPg=0&Increment=50&submit=Search	2821293			ZINC01038692
19511	CSc1sc(c(C)c1-c1ccnc(SCC(=O)Nc2ccc(Cl)cc2)n1)-c1nc(C)cs1	WRXXISITJDZVCL-UHFFFAOYSA-N	N-(4-chlorophenyl)-2-({4-[4-methyl-5-(4-methyl-1,3-thiazol-2-yl)-2-(methylsulfanyl)thiophen-3-yl]pyrimidin-2-yl}sulfanyl)acetamide::pyrimidine-containing compound 3	3C-like proteinase (3CL-PRO)	Human SARS coronavirus		11000			10.1021/jm050852f	http://www.bindingdb.org/jsp/dbsearch/PrimarySearch_ki.jsp?energyterm=kJ/mole&tag=r21&monomerid=11266&enzyme=3C-like+proteinase+%283CL-PRO%29&column=ki&startPg=0&Increment=50&submit=Search	2820912			ZINC02142079
19512	CSc1sc(c(C)c1-c1ccnc(SCC(=O)Nc2ccccc2Cl)n1)-c1nc(C)cs1	NNVVKOVHRSDRSQ-UHFFFAOYSA-N	N-(2-chlorophenyl)-2-({4-[4-methyl-5-(4-methyl-1,3-thiazol-2-yl)-2-(methylsulfanyl)thiophen-3-yl]pyrimidin-2-yl}sulfanyl)acetamide::pyrimidine-containing compound 4	3C-like proteinase (3CL-PRO)	Human SARS coronavirus		12000			10.1021/jm050852f	http://www.bindingdb.org/jsp/dbsearch/PrimarySearch_ki.jsp?energyterm=kJ/mole&tag=r21&monomerid=11267&enzyme=3C-like+proteinase+%283CL-PRO%29&column=ki&startPg=0&Increment=50&submit=Search	2820914			ZINC02141912
19513	Cc1nc(cs1)-c1nc(cs1)-c1ccnc(SCC(=O)Nc2ccc(Cl)cc2)n1	JEZYTEDGOJCVQS-UHFFFAOYSA-N	N-(4-chlorophenyl)-2-({4-[2-(2-methyl-1,3-thiazol-4-yl)-1,3-thiazol-4-yl]pyrimidin-2-yl}sulfanyl)acetamide::jm5b01461, Compound 109::pyrimidine-containing compound 5	3C-like proteinase (3CL-PRO)	Human SARS coronavirus		14000			10.1021/jm050852f	http://www.bindingdb.org/jsp/dbsearch/PrimarySearch_ki.jsp?energyterm=kJ/mole&tag=r21&monomerid=11268&enzyme=3C-like+proteinase+%283CL-PRO%29&column=ki&startPg=0&Increment=50&submit=Search	2744846			ZINC02153371
19514	Clc1ccc(NC(=O)CSc2nccc(n2)-c2cc(no2)-c2ccccc2)cc1	TUBDEXWKZSAMKH-UHFFFAOYSA-N	N-(4-chlorophenyl)-2-{[4-(3-phenyl-1,2-oxazol-5-yl)pyrimidin-2-yl]sulfanyl}acetamide::jm5b01461, Compound 110::pyrimidine-containing compound 6	3C-like proteinase (3CL-PRO)	Human SARS coronavirus		15000			10.1021/jm050852f	http://www.bindingdb.org/jsp/dbsearch/PrimarySearch_ki.jsp?energyterm=kJ/mole&tag=r21&monomerid=11269&enzyme=3C-like+proteinase+%283CL-PRO%29&column=ki&startPg=0&Increment=50&submit=Search	2745617			ZINC01031719
19515	FC(F)(F)c1ccc(NC(=O)CSc2nccc(n2)-c2cc(no2)-c2ccc(Cl)cc2Cl)cc1	QECWOSUSNVKLGQ-UHFFFAOYSA-N	2-({4-[3-(2,4-dichlorophenyl)-1,2-oxazol-5-yl]pyrimidin-2-yl}sulfanyl)-N-[4-(trifluoromethyl)phenyl]acetamide::pyrimidine-containing compound 7	3C-like proteinase (3CL-PRO)	Human SARS coronavirus		15000			10.1021/jm050852f	http://www.bindingdb.org/jsp/dbsearch/PrimarySearch_ki.jsp?energyterm=kJ/mole&tag=r21&monomerid=11270&enzyme=3C-like+proteinase+%283CL-PRO%29&column=ki&startPg=0&Increment=50&submit=Search	2745640			ZINC02143859
19516	Clc1ccc(NC(=O)CSc2nccc(n2)-c2cc(no2)-c2ccccc2Cl)cc1	UQVHELVNDYDRGX-UHFFFAOYSA-N	N-(4-chlorophenyl)-2-({4-[3-(2-chlorophenyl)-1,2-oxazol-5-yl]pyrimidin-2-yl}sulfanyl)acetamide::pyrimidine-containing compound 8	3C-like proteinase (3CL-PRO)	Human SARS coronavirus		15000			10.1021/jm050852f	http://www.bindingdb.org/jsp/dbsearch/PrimarySearch_ki.jsp?energyterm=kJ/mole&tag=r21&monomerid=11271&enzyme=3C-like+proteinase+%283CL-PRO%29&column=ki&startPg=0&Increment=50&submit=Search	2745653			ZINC01031786
19517	CCCc1cc(=O)[nH]c(SCC(=O)Nc2ccc(Cl)cc2)n1	YBWHJLWKGZIQNQ-UHFFFAOYSA-N	N-(4-chlorophenyl)-2-[(4-hydroxy-6-propylpyrimidin-2-yl)sulfanyl]acetamide::pyrimidine-containing compound 9	3C-like proteinase (3CL-PRO)	Human SARS coronavirus		30000			10.1021/jm050852f	http://www.bindingdb.org/jsp/dbsearch/PrimarySearch_ki.jsp?energyterm=kJ/mole&tag=r21&monomerid=11272&enzyme=3C-like+proteinase+%283CL-PRO%29&column=ki&startPg=0&Increment=50&submit=Search	763192			ZINC05043294
19518	COc1cccc(c1)-c1nc(SCC(=O)Nc2ccc(cc2)S(N)(=O)=O)[nH]c(=O)c1C#N	MFBIUOFKXQKEGQ-UHFFFAOYSA-N	2-{[5-cyano-4-(3-methoxyphenyl)-6-oxo-1,6-dihydropyrimidin-2-yl]sulfanyl}-N-(4-sulfamoylphenyl)acetamide::CHEMBL210497::pyrimidinone-containing compound 10	3C-like proteinase (3CL-PRO)	Human SARS coronavirus		40000			10.1021/jm050852f	http://www.bindingdb.org/jsp/dbsearch/PrimarySearch_ki.jsp?energyterm=kJ/mole&tag=r21&monomerid=11273&enzyme=3C-like+proteinase+%283CL-PRO%29&column=ki&startPg=0&Increment=50&submit=Search	2292729	CHEMBL210497		ZINC02995601
19519	CC(C)c1ccc(NC(=O)CSc2nccc(n2)-c2cccs2)cc1	UUBHDKPSKIQBFE-UHFFFAOYSA-N	N-[4-(propan-2-yl)phenyl]-2-{[4-(thiophen-2-yl)pyrimidin-2-yl]sulfanyl}acetamide::pyrimidine-containing compound 11	3C-like proteinase (3CL-PRO)	Human SARS coronavirus		40000			10.1021/jm050852f	http://www.bindingdb.org/jsp/dbsearch/PrimarySearch_ki.jsp?energyterm=kJ/mole&tag=r21&monomerid=11274&enzyme=3C-like+proteinase+%283CL-PRO%29&column=ki&startPg=0&Increment=50&submit=Search	2811874			ZINC04324994
19520	COc1ccc(NC(=O)CSc2nc(cc(=O)[nH]2)-c2ccccc2)cc1OC	KIFWJAVYYRTXDP-UHFFFAOYSA-N	N-(3,4-dimethoxyphenyl)-2-[(4-hydroxy-6-phenylpyrimidin-2-yl)sulfanyl]acetamide::pyrimidine-containing compound 12	3C-like proteinase (3CL-PRO)	Human SARS coronavirus		45000			10.1021/jm050852f	http://www.bindingdb.org/jsp/dbsearch/PrimarySearch_ki.jsp?energyterm=kJ/mole&tag=r21&monomerid=11275&enzyme=3C-like+proteinase+%283CL-PRO%29&column=ki&startPg=0&Increment=50&submit=Search	1128176			ZINC18023199
19521	COc1cccc(c1)-c1nc(SCC(=O)Nc2ccc(cc2)C(C)=O)[nH]c(=O)c1C#N	PWZKDBYJLZTANB-UHFFFAOYSA-N	2-{[5-cyano-4-(3-methoxyphenyl)-6-oxo-1,6-dihydropyrimidin-2-yl]sulfanyl}-N-(4-acetylphenyl)acetamide::pyrimidinone-containing compound 13	3C-like proteinase (3CL-PRO)	Human SARS coronavirus		60000			10.1021/jm050852f	http://www.bindingdb.org/jsp/dbsearch/PrimarySearch_ki.jsp?energyterm=kJ/mole&tag=r21&monomerid=11276&enzyme=3C-like+proteinase+%283CL-PRO%29&column=ki&startPg=0&Increment=50&submit=Search	2171126			ZINC02782840
19522	CCC(Sc1nc(-c2cccc(OC)c2)c(C#N)c(=O)[nH]1)C(=O)Nc1cccc(c1)C(C)=O	UNAFKZLBLWRTQK-UHFFFAOYSA-N	2-{[5-cyano-4-(3-methoxyphenyl)-6-oxo-1,6-dihydropyrimidin-2-yl]sulfanyl}-N-(3-acetylphenyl)butanamide::pyrimidinone-containing compound 14	3C-like proteinase (3CL-PRO)	Human SARS coronavirus		60000			10.1021/jm050852f	http://www.bindingdb.org/jsp/dbsearch/PrimarySearch_ki.jsp?energyterm=kJ/mole&tag=r21&monomerid=11277&enzyme=3C-like+proteinase+%283CL-PRO%29&column=ki&startPg=0&Increment=50&submit=Search	2918614			ZINC06016526
19523	Cc1cc(=O)[nH]c(SCC(=O)Nc2cc(Cl)ccc2Oc2ccccc2)n1	KROPIDGCKMSLKK-UHFFFAOYSA-N	N-(5-chloro-2-phenoxyphenyl)-2-[(4-methyl-6-oxo-1,6-dihydropyrimidin-2-yl)sulfanyl]acetamide::pyrimidinone-containing compound 15	3C-like proteinase (3CL-PRO)	Human SARS coronavirus		100000			10.1021/jm050852f	http://www.bindingdb.org/jsp/dbsearch/PrimarySearch_ki.jsp?energyterm=kJ/mole&tag=r21&monomerid=11278&enzyme=3C-like+proteinase+%283CL-PRO%29&column=ki&startPg=0&Increment=50&submit=Search	1212367			ZINC18127668
19524	Cc1cc(=O)[nH]c(SCC(=O)Nc2ccc(Oc3ccc(Cl)cc3)cc2)n1	ZUEMNPRILMWAIX-UHFFFAOYSA-N	N-[4-(4-chlorophenoxy)phenyl]-2-[(4-hydroxy-6-methylpyrimidin-2-yl)sulfanyl]acetamide::pyrimidine-containing compound 16	3C-like proteinase (3CL-PRO)	Human SARS coronavirus		200000			10.1021/jm050852f	http://www.bindingdb.org/jsp/dbsearch/PrimarySearch_ki.jsp?energyterm=kJ/mole&tag=r21&monomerid=11279&enzyme=3C-like+proteinase+%283CL-PRO%29&column=ki&startPg=0&Increment=50&submit=Search	990824			ZINC18249845
19525	CC(C)c1ccc(NC(=O)CSc2nccc(n2)-c2csc(COc3ccccc3Cl)n2)cc1	FAICNNMEVHYSOP-UHFFFAOYSA-N	2-({4-[2-(2-chlorophenoxymethyl)-1,3-thiazol-4-yl]pyrimidin-2-yl}sulfanyl)-N-[4-(propan-2-yl)phenyl]acetamide::pyrimidine-containing compound 17	3C-like proteinase (3CL-PRO)	Human SARS coronavirus		200000			10.1021/jm050852f	http://www.bindingdb.org/jsp/dbsearch/PrimarySearch_ki.jsp?energyterm=kJ/mole&tag=r21&monomerid=11280&enzyme=3C-like+proteinase+%283CL-PRO%29&column=ki&startPg=0&Increment=50&submit=Search	2744870			ZINC01047818
19526	COC(OC)c1cc(=O)[nH]c(SCC(=O)Nc2ccc(cc2)C(F)(F)F)n1	ZCGRJMKKUYGRMN-UHFFFAOYSA-N	2-{[4-(dimethoxymethyl)-6-hydroxypyrimidin-2-yl]sulfanyl}-N-[4-(trifluoromethyl)phenyl]acetamide::pyrimidine-containing compound 18	3C-like proteinase (3CL-PRO)	Human SARS coronavirus		200000			10.1021/jm050852f	http://www.bindingdb.org/jsp/dbsearch/PrimarySearch_ki.jsp?energyterm=kJ/mole&tag=r21&monomerid=11281&enzyme=3C-like+proteinase+%283CL-PRO%29&column=ki&startPg=0&Increment=50&submit=Search	2745968			ZINC05176655
19527	CCCCc1ccc(NC(=O)CSc2nc(C3CCCCC3)c(C#N)c(=O)[nH]2)c(C)c1	GBDKYZQJONYDPW-UHFFFAOYSA-N	N-(4-butyl-2-methylphenyl)-2-[(5-cyano-4-cyclohexyl-6-oxo-1,6-dihydropyrimidin-2-yl)sulfanyl]acetamide::pyrimidinone-containing compound 19	3C-like proteinase (3CL-PRO)	Human SARS coronavirus		200000			10.1021/jm050852f	http://www.bindingdb.org/jsp/dbsearch/PrimarySearch_ki.jsp?energyterm=kJ/mole&tag=r21&monomerid=11282&enzyme=3C-like+proteinase+%283CL-PRO%29&column=ki&startPg=0&Increment=50&submit=Search	501651			ZINC08647806
19528	FC(F)(F)c1cccc(NC(=O)CSc2nc(-c3ccccc3)c(C#N)c(=O)[nH]2)c1	FNZHACBCLXJSBM-UHFFFAOYSA-N	2-[(5-cyano-6-oxo-4-phenyl-1,6-dihydropyrimidin-2-yl)sulfanyl]-N-[3-(trifluoromethyl)phenyl]acetamide::pyrimidinone-containing compound 20	3C-like proteinase (3CL-PRO)	Human SARS coronavirus		200000			10.1021/jm050852f	http://www.bindingdb.org/jsp/dbsearch/PrimarySearch_ki.jsp?energyterm=kJ/mole&tag=r21&monomerid=11283&enzyme=3C-like+proteinase+%283CL-PRO%29&column=ki&startPg=0&Increment=50&submit=Search	2167624			ZINC02758059
19529	CCOC(=O)c1cnc(SCC(=O)Nc2ccc(cc2)[N+]([O-])=O)nc1N	UOLRFSMMZCPIDL-UHFFFAOYSA-N	ethyl 4-amino-2-({[(4-nitrophenyl)carbamoyl]methyl}sulfanyl)pyrimidine-5-carboxylate::pyrimidine-containing compound 21	3C-like proteinase (3CL-PRO)	Human SARS coronavirus		250000			10.1021/jm050852f	http://www.bindingdb.org/jsp/dbsearch/PrimarySearch_ki.jsp?energyterm=kJ/mole&tag=r21&monomerid=11284&enzyme=3C-like+proteinase+%283CL-PRO%29&column=ki&startPg=0&Increment=50&submit=Search	2810524			ZINC08618207
19530	CCOc1ccc(cc1)-n1c(O)cc(Sc2nc(C)cc(C)n2)c1O	RMGUDEJOXAUCMU-UHFFFAOYSA-N	3-[(4,6-dimethylpyrimidin-2-yl)sulfanyl]-1-(4-ethoxyphenyl)pyrrolidine-2,5-dione::pyrimidine-containing compound 22	3C-like proteinase (3CL-PRO)	Human SARS coronavirus		300000			10.1021/jm050852f	http://www.bindingdb.org/jsp/dbsearch/PrimarySearch_ki.jsp?energyterm=kJ/mole&tag=r21&monomerid=11285&enzyme=3C-like+proteinase+%283CL-PRO%29&column=ki&startPg=0&Increment=50&submit=Search	91895790			ZINC00921863
19531	COc1cccc(c1)-c1nc(SCC(=O)Nc2ccc(cc2)[N+]([O-])=O)[nH]c(=O)c1C#N	VZQGOJYNWVCAKC-UHFFFAOYSA-N	2-{[5-cyano-4-(3-methoxyphenyl)-6-oxo-1,6-dihydropyrimidin-2-yl]sulfanyl}-N-(4-nitrophenyl)acetamide::pyrimidinone-containing compound 23	3C-like proteinase (3CL-PRO)	Human SARS coronavirus		300000			10.1021/jm050852f	http://www.bindingdb.org/jsp/dbsearch/PrimarySearch_ki.jsp?energyterm=kJ/mole&tag=r21&monomerid=11286&enzyme=3C-like+proteinase+%283CL-PRO%29&column=ki&startPg=0&Increment=50&submit=Search	2918926			ZINC09833493
19532	CC(Sc1nc(-c2ccccc2)c(C#N)c(=O)[nH]1)C(=O)Nc1ccc(Cl)cc1	DGNRVGPZXZKQQS-UHFFFAOYSA-N	N-(4-chlorophenyl)-2-[(5-cyano-6-oxo-4-phenyl-1,6-dihydropyrimidin-2-yl)sulfanyl]propanamide::pyrimidinone-containing compound 24	3C-like proteinase (3CL-PRO)	Human SARS coronavirus		300000			10.1021/jm050852f	http://www.bindingdb.org/jsp/dbsearch/PrimarySearch_ki.jsp?energyterm=kJ/mole&tag=r21&monomerid=11287&enzyme=3C-like+proteinase+%283CL-PRO%29&column=ki&startPg=0&Increment=50&submit=Search	2946678			ZINC02751023
19533	CC(C)(C)c1ccc(NC(=O)CSc2nc(C3CCCCC3)c(C#N)c(=O)[nH]2)cc1	OLHLKONSFGSLGT-UHFFFAOYSA-N	N-(4-tert-butylphenyl)-2-[(5-cyano-4-cyclohexyl-6-oxo-1,6-dihydropyrimidin-2-yl)sulfanyl]acetamide::pyrimidinone-containing compound 25	3C-like proteinase (3CL-PRO)	Human SARS coronavirus		350000			10.1021/jm050852f	http://www.bindingdb.org/jsp/dbsearch/PrimarySearch_ki.jsp?energyterm=kJ/mole&tag=r21&monomerid=11288&enzyme=3C-like+proteinase+%283CL-PRO%29&column=ki&startPg=0&Increment=50&submit=Search	2727994			ZINC01043294
19534	COc1ccc(cc1)-c1ccnc(SCC(=O)Nc2ccc(cc2)C(C)C)n1	CJBZKDWWJIGHRP-UHFFFAOYSA-N	2-{[4-(4-methoxyphenyl)pyrimidin-2-yl]sulfanyl}-N-[4-(propan-2-yl)phenyl]acetamide::pyrimidine-containing compound 26	3C-like proteinase (3CL-PRO)	Human SARS coronavirus		400000			10.1021/jm050852f	http://www.bindingdb.org/jsp/dbsearch/PrimarySearch_ki.jsp?energyterm=kJ/mole&tag=r21&monomerid=11289&enzyme=3C-like+proteinase+%283CL-PRO%29&column=ki&startPg=0&Increment=50&submit=Search	2823615			ZINC01040329
19535	Cc1cc(nc(SCC(=O)Nc2ccc(Cl)cc2F)n1)C(F)(F)F	HYEIKCOUEGKGTH-UHFFFAOYSA-N	N-(4-chloro-2-fluorophenyl)-2-{[4-methyl-6-(trifluoromethyl)pyrimidin-2-yl]sulfanyl}acetamide::pyrimidine-containing compound 27	3C-like proteinase (3CL-PRO)	Human SARS coronavirus		500000			10.1021/jm050852f	http://www.bindingdb.org/jsp/dbsearch/PrimarySearch_ki.jsp?energyterm=kJ/mole&tag=r21&monomerid=11290&enzyme=3C-like+proteinase+%283CL-PRO%29&column=ki&startPg=0&Increment=50&submit=Search	1342108			ZINC01177741
19536	Cc1nc(SCC(=O)Nc2ccc(cc2)[N+]([O-])=O)[n-]c(=[OH+])c1C	LSSIOYMBCDLTDA-UHFFFAOYSA-N	2-[(4-hydroxy-5,6-dimethylpyrimidin-2-yl)sulfanyl]-N-(4-nitrophenyl)acetamide::pyrimidine-containing compound 28	3C-like proteinase (3CL-PRO)	Human SARS coronavirus		>1000000			10.1021/jm050852f	http://www.bindingdb.org/jsp/dbsearch/PrimarySearch_ki.jsp?energyterm=kJ/mole&tag=r21&monomerid=11291&enzyme=3C-like+proteinase+%283CL-PRO%29&column=ki&startPg=0&Increment=50&submit=Search	2962669			ZINC14947942
19537	Cc1cc(c(Cl)cc1Cl)S(=O)(=O)c1c(cc(cc1[N+]([O-])=O)C(F)(F)F)[N+]([O-])=O	INAZPZCJNPPHGV-UHFFFAOYSA-N	1,5-dichloro-2-{[2,6-dinitro-4-(trifluoromethyl)benzene]sulfonyl}-4-methylbenzene::Compound 1 analog 3::med.21724, Compound 147	3C-like proteinase (3CL-PRO)	Human SARS coronavirus		300			10.1021/jm060207o	http://www.bindingdb.org/jsp/dbsearch/PrimarySearch_ki.jsp?energyterm=kJ/mole&tag=r21&monomerid=11292&enzyme=3C-like+proteinase+%283CL-PRO%29&column=ki&startPg=0&Increment=50&submit=Search	2799606		DB07620	ZINC08626709
19538	ClC(Cl)=C(Cl)C(=O)Oc1ccc(cc1)S(=O)(=O)c1ccc(OC(=O)C(Cl)=C(Cl)Cl)cc1	HXYPMMAPDRFFTM-UHFFFAOYSA-N	4-({4-[(2,3,3-trichloroprop-2-enoyl)oxy]benzene}sulfonyl)phenyl 2,3,3-trichloroprop-2-enoate::Compound 1 analog 4	3C-like proteinase (3CL-PRO)	Human SARS coronavirus		900			10.1021/jm060207o	http://www.bindingdb.org/jsp/dbsearch/PrimarySearch_ki.jsp?energyterm=kJ/mole&tag=r21&monomerid=11293&enzyme=3C-like+proteinase+%283CL-PRO%29&column=ki&startPg=0&Increment=50&submit=Search	2774892			ZINC02155429
19539	Nc1ncc(c(N)n1)S(=O)(=O)c1ccc(Cl)cc1	RPPFHWBHHCJZJS-UHFFFAOYSA-N	5-[(4-chlorobenzene)sulfonyl]pyrimidine-2,4-diamine::Compound 1 analog 5	3C-like proteinase (3CL-PRO)	Human SARS coronavirus		6000			10.1021/jm060207o	http://www.bindingdb.org/jsp/dbsearch/PrimarySearch_ki.jsp?energyterm=kJ/mole&tag=r21&monomerid=11294&enzyme=3C-like+proteinase+%283CL-PRO%29&column=ki&startPg=0&Increment=50&submit=Search	2819040			ZINC00165976
19540	[O-][N+](=O)c1cc(ccc1S(=O)(=O)c1ccc(Cl)cc1)C(F)(F)F	ZNNXTHUWLFOGRX-UHFFFAOYSA-N	1-[(4-chlorobenzene)sulfonyl]-2-nitro-4-(trifluoromethyl)benzene::Compound 1 analog 6	3C-like proteinase (3CL-PRO)	Human SARS coronavirus		12000			10.1021/jm060207o	http://www.bindingdb.org/jsp/dbsearch/PrimarySearch_ki.jsp?energyterm=kJ/mole&tag=r21&monomerid=11295&enzyme=3C-like+proteinase+%283CL-PRO%29&column=ki&startPg=0&Increment=50&submit=Search	2797358			ZINC01036244
19541	Cc1nc(c(C#N)c(C)c1[N+]([O-])=O)S(=O)(=O)c1ccccc1	JLRPBEAXLCQKGS-UHFFFAOYSA-N	2-(benzenesulfonyl)-4,6-dimethyl-5-nitropyridine-3-carbonitrile::Compound 1 analog 7::cid_2726174	3C-like proteinase (3CL-PRO)	Human SARS coronavirus		13000			10.1021/jm060207o	http://www.bindingdb.org/jsp/dbsearch/PrimarySearch_ki.jsp?energyterm=kJ/mole&tag=r21&monomerid=11296&enzyme=3C-like+proteinase+%283CL-PRO%29&column=ki&startPg=0&Increment=50&submit=Search	2726174			ZINC00075465
19542	Cc1ccc(cc1)S(=O)(=O)c1nc(C)c(c(C)c1C#N)[N+]([O-])=O	SWVOLMFAZXVBNL-UHFFFAOYSA-N	4,6-dimethyl-2-[(4-methylbenzene)sulfonyl]-5-nitropyridine-3-carbonitrile::Compound 1 analog 8::cid_2726176	3C-like proteinase (3CL-PRO)	Human SARS coronavirus		13000			10.1021/jm060207o	http://www.bindingdb.org/jsp/dbsearch/PrimarySearch_ki.jsp?energyterm=kJ/mole&tag=r21&monomerid=11297&enzyme=3C-like+proteinase+%283CL-PRO%29&column=ki&startPg=0&Increment=50&submit=Search	2726176			ZINC00075474
19543	[O-][N+](=O)c1ccc([n+]([O-])c1)S(=O)(=O)c1ccc(Cl)cc1	CWTLKYCMNTVRJN-UHFFFAOYSA-N	2-[(4-chlorobenzene)sulfonyl]-5-nitro-1-oxidopyridin-1-ium::Compound 1 analog 9	3C-like proteinase (3CL-PRO)	Human SARS coronavirus		15000			10.1021/jm060207o	http://www.bindingdb.org/jsp/dbsearch/PrimarySearch_ki.jsp?energyterm=kJ/mole&tag=r21&monomerid=11298&enzyme=3C-like+proteinase+%283CL-PRO%29&column=ki&startPg=0&Increment=50&submit=Search	2774667			ZINC02163160
19544	CCOC(=O)C(C=Nc1ccc(cc1)S(=O)(=O)c1ccc(cc1)N=CC(C#N)C(=O)OCC)C#N	SAZFDZVQWXQDCI-UHFFFAOYSA-N	Compound 1 analog 10::ethyl (2E)-2-cyano-3-({4-[(4-{[(1E)-2-cyano-3-ethoxy-3-oxoprop-1-en-1-yl]amino}benzene)sulfonyl]phenyl}amino)prop-2-enoate	3C-like proteinase (3CL-PRO)	Human SARS coronavirus		16000			10.1021/jm060207o	http://www.bindingdb.org/jsp/dbsearch/PrimarySearch_ki.jsp?energyterm=kJ/mole&tag=r21&monomerid=11299&enzyme=3C-like+proteinase+%283CL-PRO%29&column=ki&startPg=0&Increment=50&submit=Search	91593741			ZINC08626728
19545	OC(=O)c1ccc(cc1)S(=O)(=O)c1cc(Br)c(O)c(Br)c1	PWOOQGJCRRKDBU-UHFFFAOYSA-N	4-[(3,5-dibromo-4-hydroxybenzene)sulfonyl]benzoic acid::Compound 1 analog 11	3C-like proteinase (3CL-PRO)	Human SARS coronavirus		16000			10.1021/jm060207o	http://www.bindingdb.org/jsp/dbsearch/PrimarySearch_ki.jsp?energyterm=kJ/mole&tag=r21&monomerid=11300&enzyme=3C-like+proteinase+%283CL-PRO%29&column=ki&startPg=0&Increment=50&submit=Search	2775844			ZINC19851614
19546	CC(=O)c1ccccc1S(=O)(=O)c1ccccc1C(O)=O	PZDMHBOCYKZMGI-UHFFFAOYSA-N	2-[(2-acetylbenzene)sulfonyl]benzoic acid::Compound 1 analog 12	3C-like proteinase (3CL-PRO)	Human SARS coronavirus		16000			10.1021/jm060207o	http://www.bindingdb.org/jsp/dbsearch/PrimarySearch_ki.jsp?energyterm=kJ/mole&tag=r21&monomerid=11301&enzyme=3C-like+proteinase+%283CL-PRO%29&column=ki&startPg=0&Increment=50&submit=Search	4270495			ZINC00136351
19547	[O-][N+](=O)c1ccc(cc1)S(=O)(=O)c1ccc(cc1)[N+]([O-])=O	BVHNGWRPAFKGFP-UHFFFAOYSA-N	1-nitro-4-[(4-nitrobenzene)sulfonyl]benzene::Compound 1 analog 13	3C-like proteinase (3CL-PRO)	Human SARS coronavirus		25000			10.1021/jm060207o	http://www.bindingdb.org/jsp/dbsearch/PrimarySearch_ki.jsp?energyterm=kJ/mole&tag=r21&monomerid=11302&enzyme=3C-like+proteinase+%283CL-PRO%29&column=ki&startPg=0&Increment=50&submit=Search	70871			ZINC01571129
19548	CCOC(=O)C(C=Nc1ccc(cc1)S(=O)(=O)c1ccc(cc1)N=CC(C(=O)OCC)C(=O)OCC)C(=O)OCC	ZGEVEUKFALIUBB-UHFFFAOYSA-N	1,3-diethyl 2-[({4-[(4-{[3-ethoxy-2-(ethoxycarbonyl)-3-oxoprop-1-en-1-yl]amino}benzene)sulfonyl]phenyl}amino)methylidene]propanedioate::Compound 1 analog 14	3C-like proteinase (3CL-PRO)	Human SARS coronavirus		32000			10.1021/jm060207o	http://www.bindingdb.org/jsp/dbsearch/PrimarySearch_ki.jsp?energyterm=kJ/mole&tag=r21&monomerid=11303&enzyme=3C-like+proteinase+%283CL-PRO%29&column=ki&startPg=0&Increment=50&submit=Search	91230600			ZINC08626727
19549	FC(F)(F)c1nnc(SC(=O)c2ccc(o2)C#Cc2ccccc2)[nH]1	VNGWUVBXUIDQTK-UHFFFAOYSA-N	Compound 2 analog 15::MurB inhibitor (compound 16)::[5-(2-phenylethynyl)furan-2-yl]({[5-(trifluoromethyl)-4H-1,2,4-triazol-3-yl]sulfanyl})methanone::med.21724, Compound 148	3C-like proteinase (3CL-PRO)	Human SARS coronavirus		3000			10.1021/jm060207o	http://www.bindingdb.org/jsp/dbsearch/PrimarySearch_ki.jsp?energyterm=kJ/mole&tag=r21&monomerid=11304&enzyme=3C-like+proteinase+%283CL-PRO%29&column=ki&startPg=0&Increment=50&submit=Search	2822496		DB07743	ZINC01039846
19550	Cc1[n-][o+]c(NC(=O)c2ccc(s2)-c2cc(nn2C)C(F)(F)F)c1[N+]([O-])=O	BCEDEDBQGPNQMM-UHFFFAOYSA-N	5-[1-methyl-3-(trifluoromethyl)-1H-pyrazol-5-yl]-N-(3-methyl-4-nitro-1,2-oxazol-5-yl)thiophene-2-carboxamide::Compound 2 analog 16	3C-like proteinase (3CL-PRO)	Human SARS coronavirus		5000			10.1021/jm060207o	http://www.bindingdb.org/jsp/dbsearch/PrimarySearch_ki.jsp?energyterm=kJ/mole&tag=r21&monomerid=11305&enzyme=3C-like+proteinase+%283CL-PRO%29&column=ki&startPg=0&Increment=50&submit=Search	3776668			ZINC05212111
19551	Cc1oc(cc1-c1cc(NS(=O)(=O)c2cccs2)[nH]n1)C(C)(C)C	HUNAFKUGDBHPEN-UHFFFAOYSA-N	Compound 2 analog 17::N-[3-(5-tert-butyl-2-methylfuran-3-yl)-1H-pyrazol-5-yl]thiophene-2-sulfonamide	3C-like proteinase (3CL-PRO)	Human SARS coronavirus		10000			10.1021/jm060207o	http://www.bindingdb.org/jsp/dbsearch/PrimarySearch_ki.jsp?energyterm=kJ/mole&tag=r21&monomerid=11306&enzyme=3C-like+proteinase+%283CL-PRO%29&column=ki&startPg=0&Increment=50&submit=Search	2742278			ZINC01046803
19552	CSc1n[nH]c(NC(=O)c2cccs2)c1S(=O)(=O)c1ccc(Cl)cc1	WTTWXUFEJVILJY-UHFFFAOYSA-N	Compound 2 analog 18::N-{4-[(4-chlorobenzene)sulfonyl]-3-(methylsulfanyl)-1H-pyrazol-5-yl}thiophene-2-carboxamide	3C-like proteinase (3CL-PRO)	Human SARS coronavirus		15000			10.1021/jm060207o	http://www.bindingdb.org/jsp/dbsearch/PrimarySearch_ki.jsp?energyterm=kJ/mole&tag=r21&monomerid=11307&enzyme=3C-like+proteinase+%283CL-PRO%29&column=ki&startPg=0&Increment=50&submit=Search	2819269			ZINC14947945
19553	CC1(C)Cc2c(sc(NCc3ccco3)c2C(=O)C1)C#N	OELFRKXRVLKMSJ-UHFFFAOYSA-N	3-[(furan-2-ylmethyl)amino]-6,6-dimethyl-4-oxo-4,5,6,7-tetrahydro-2-benzothiophene-1-carbonitrile::Compound 2 analog 19	3C-like proteinase (3CL-PRO)	Human SARS coronavirus		16000			10.1021/jm060207o	http://www.bindingdb.org/jsp/dbsearch/PrimarySearch_ki.jsp?energyterm=kJ/mole&tag=r21&monomerid=11308&enzyme=3C-like+proteinase+%283CL-PRO%29&column=ki&startPg=0&Increment=50&submit=Search	2820775			ZINC00148901
19554	CSc1nn(c(-c2cccs2)c1C#N)-c1c(c(C)nn1C)[N+]([O-])=O	NTMNWUJSOXLLCJ-UHFFFAOYSA-N	1-(1,3-dimethyl-4-nitro-1H-pyrazol-5-yl)-3-(methylsulfanyl)-5-(thiophen-2-yl)-1H-pyrazole-4-carbonitrile::Compound 2 analog 20	3C-like proteinase (3CL-PRO)	Human SARS coronavirus		18000			10.1021/jm060207o	http://www.bindingdb.org/jsp/dbsearch/PrimarySearch_ki.jsp?energyterm=kJ/mole&tag=r21&monomerid=11309&enzyme=3C-like+proteinase+%283CL-PRO%29&column=ki&startPg=0&Increment=50&submit=Search	4398304			ZINC06469850
19555	Clc1ccc(s1)-c1csc(CS(=O)(=O)c2cccs2)n1	RNWCXVNZHBPXSO-UHFFFAOYSA-N	4-(5-chlorothiophen-2-yl)-2-[(thiophene-2-sulfonyl)methyl]-1,3-thiazole hydrobromide::Compound 2 analog 21	3C-like proteinase (3CL-PRO)	Human SARS coronavirus		18000			10.1021/jm060207o	http://www.bindingdb.org/jsp/dbsearch/PrimarySearch_ki.jsp?energyterm=kJ/mole&tag=r21&monomerid=11310&enzyme=3C-like+proteinase+%283CL-PRO%29&column=ki&startPg=0&Increment=50&submit=Search	2809433			ZINC01028333
19556	Cc1nn(C)c(NCc2ccc(s2)-c2cccs2)c1[N+]([O-])=O	FRQPWTXXDABLQI-UHFFFAOYSA-N	1,3-dimethyl-4-nitro-N-{[5-(thiophen-2-yl)thiophen-2-yl]methyl}-1H-pyrazol-5-amine::Compound 2 analog 22	3C-like proteinase (3CL-PRO)	Human SARS coronavirus		20000			10.1021/jm060207o	http://www.bindingdb.org/jsp/dbsearch/PrimarySearch_ki.jsp?energyterm=kJ/mole&tag=r21&monomerid=11311&enzyme=3C-like+proteinase+%283CL-PRO%29&column=ki&startPg=0&Increment=50&submit=Search	4305683			ZINC05212044
19557	O=C(CC1=NCCS1)c1nccs1	GGVYMBBIRKYGKJ-UHFFFAOYSA-N	2-(4,5-dihydro-1,3-thiazol-2-yl)-1-(1,3-thiazol-2-yl)ethan-1-one::Compound 2 analog 23	3C-like proteinase (3CL-PRO)	Human SARS coronavirus		40000			10.1021/jm060207o	http://www.bindingdb.org/jsp/dbsearch/PrimarySearch_ki.jsp?energyterm=kJ/mole&tag=r21&monomerid=11312&enzyme=3C-like+proteinase+%283CL-PRO%29&column=ki&startPg=0&Increment=50&submit=Search	23644661			ZINC14947948
42404	O=C(CSc1nc(nc2ccccc12)C1CCCCC1)NCc1ccco1	TUMJQFRANSTLTQ-UHFFFAOYSA-N	2-[(2-cyclohexylquinazolin-4-yl)sulfanyl]-N-(furan-2-ylmethyl)acetamide::Compound PJ07::jm5b01461, Compound 182	3C-like proteinase (3CL-PRO)	Human SARS coronavirus		18200			10.1016/j.bmc.2008.01.011	http://www.bindingdb.org/jsp/dbsearch/PrimarySearch_ki.jsp?energyterm=kJ/mole&tag=r21&monomerid=23307&enzyme=3C-like+proteinase+%283CL-PRO%29&column=ki&startPg=0&Increment=50&submit=Search	1465905			ZINC01376434
42405	Cc1ccccc1CCN(Cc1cc2cc(C)c(C)cc2[nH]c1=O)C(=O)NCc1ccccc1	SQUUVUDFHHMCTC-UHFFFAOYSA-N	3-benzyl-1-[(6,7-dimethyl-2-oxo-1,2-dihydroquinolin-3-yl)methyl]-1-[2-(2-methylphenyl)ethyl]urea::Compound PJ169::jm5b01461, Compound 183	3C-like proteinase (3CL-PRO)	Human SARS coronavirus		17200			10.1016/j.bmc.2008.01.011	http://www.bindingdb.org/jsp/dbsearch/PrimarySearch_ki.jsp?energyterm=kJ/mole&tag=r21&monomerid=23308&enzyme=3C-like+proteinase+%283CL-PRO%29&column=ki&startPg=0&Increment=50&submit=Search	3194487			ZINC12704746
56751	C[C@@H](NC(=O)c1ccccc1C)c1ccc2ccccc2c1	PNLGQULYJADVGW-OAHLLOKOSA-N	Substituted Benzamide Derivative, lead::med.21724, Compound (R)-157::nonpeptide inhibitor 1 of SARS-CoV PLpro	SARS Coronavirus Coronavirus Papain-Like Protease	Human SARS coronavirus (isolate Tor2)		8700			10.1021/jm900611t	http://www.bindingdb.org/jsp/dbsearch/PrimarySearch_ki.jsp?energyterm=kJ/mole&tag=r21&monomerid=31508&enzyme=SARS+Coronavirus+Coronavirus+Papain-Like+Protease&column=ki&startPg=0&Increment=50&submit=Search	1287748			ZINC01108971
56752	C[C@@H](NC(=O)c1cccc(C)c1)c1ccc2ccccc2c1	LVNRFCFYRYHIAZ-OAHLLOKOSA-N	Substituted Benzamide Derivative, 5a	SARS Coronavirus Coronavirus Papain-Like Protease	Human SARS coronavirus (isolate Tor2)		14800			10.1021/jm900611t	http://www.bindingdb.org/jsp/dbsearch/PrimarySearch_ki.jsp?energyterm=kJ/mole&tag=r21&monomerid=31509&enzyme=SARS+Coronavirus+Coronavirus+Papain-Like+Protease&column=ki&startPg=0&Increment=50&submit=Search	7899742			ZINC06151896
56753	C[C@@H](NC(=O)c1ccc(C)cc1)c1ccc2ccccc2c1	KNTVHBYKKVMHQF-OAHLLOKOSA-N	Substituted Benzamide Derivative, 5b	SARS Coronavirus Coronavirus Papain-Like Protease	Human SARS coronavirus (isolate Tor2)		29100			10.1021/jm900611t	http://www.bindingdb.org/jsp/dbsearch/PrimarySearch_ki.jsp?energyterm=kJ/mole&tag=r21&monomerid=31510&enzyme=SARS+Coronavirus+Coronavirus+Papain-Like+Protease&column=ki&startPg=0&Increment=50&submit=Search	26717170			ZINC15625628
56754	COc1ccccc1C(=O)N[C@H](C)c1ccc2ccccc2c1	JVMHYDZSVSEQOA-CQSZACIVSA-N	Substituted Benzamide Derivative, 5c	SARS Coronavirus Coronavirus Papain-Like Protease	Human SARS coronavirus (isolate Tor2)		90000			10.1021/jm900611t	http://www.bindingdb.org/jsp/dbsearch/PrimarySearch_ki.jsp?energyterm=kJ/mole&tag=r21&monomerid=31511&enzyme=SARS+Coronavirus+Coronavirus+Papain-Like+Protease&column=ki&startPg=0&Increment=50&submit=Search	26084580			ZINC14424689
56755	COc1cccc(c1)C(=O)N[C@H](C)c1ccc2ccccc2c1	RBXGTEUGWCLGFT-CQSZACIVSA-N	Substituted Benzamide Derivative, 5d	SARS Coronavirus Coronavirus Papain-Like Protease	Human SARS coronavirus (isolate Tor2)		13500			10.1021/jm900611t	http://www.bindingdb.org/jsp/dbsearch/PrimarySearch_ki.jsp?energyterm=kJ/mole&tag=r21&monomerid=31512&enzyme=SARS+Coronavirus+Coronavirus+Papain-Like+Protease&column=ki&startPg=0&Increment=50&submit=Search	977528			ZINC00620307
56756	COc1ccc(cc1)C(=O)N[C@H](C)c1ccc2ccccc2c1	INKMGXZSSKJYGP-CQSZACIVSA-N	Substituted Benzamide Derivative, 5e	SARS Coronavirus Coronavirus Papain-Like Protease	Human SARS coronavirus (isolate Tor2)		149000			10.1021/jm900611t	http://www.bindingdb.org/jsp/dbsearch/PrimarySearch_ki.jsp?energyterm=kJ/mole&tag=r21&monomerid=31513&enzyme=SARS+Coronavirus+Coronavirus+Papain-Like+Protease&column=ki&startPg=0&Increment=50&submit=Search	977744			ZINC00620678
56757	C[C@@H](NC(=O)c1c(C)cccc1C)c1ccc2ccccc2c1	MAMQVWFPWIMRPM-MRXNPFEDSA-N	Naphthyl and Benzamide Derivative, 5f	SARS Coronavirus Coronavirus Papain-Like Protease	Human SARS coronavirus (isolate Tor2)		12100			10.1021/jm900611t	http://www.bindingdb.org/jsp/dbsearch/PrimarySearch_ki.jsp?energyterm=kJ/mole&tag=r21&monomerid=31514&enzyme=SARS+Coronavirus+Coronavirus+Papain-Like+Protease&column=ki&startPg=0&Increment=50&submit=Search	44236358			ZINC43073435
56758	C[C@@H](NC(=O)c1ccccc1O)c1ccc2ccccc2c1	FIJIWEVXMFUPJX-CYBMUJFWSA-N	Naphthyl and Benzamide Derivative, 5g	SARS Coronavirus Coronavirus Papain-Like Protease	Human SARS coronavirus (isolate Tor2)					10.1021/jm900611t	http://www.bindingdb.org/jsp/dbsearch/PrimarySearch_ki.jsp?energyterm=kJ/mole&tag=r21&monomerid=31515&enzyme=SARS+Coronavirus+Coronavirus+Papain-Like+Protease&column=ki&startPg=0&Increment=50&submit=Search	38619668			ZINC31403605
56759	C[C@@H](NC(=O)c1ccc(N)cc1)c1ccc2ccccc2c1	GNJCWNLNCRQOSA-CYBMUJFWSA-N	Naphthyl and Benzamide Derivative, 9	SARS Coronavirus Coronavirus Papain-Like Protease	Human SARS coronavirus (isolate Tor2)		46100			10.1021/jm900611t	http://www.bindingdb.org/jsp/dbsearch/PrimarySearch_ki.jsp?energyterm=kJ/mole&tag=r21&monomerid=31516&enzyme=SARS+Coronavirus+Coronavirus+Papain-Like+Protease&column=ki&startPg=0&Increment=50&submit=Search	44235655			ZINC43021666
56760	C[C@@H](NC(=O)c1ccc(NC(=O)OC(C)(C)C)cc1)c1ccc2ccccc2c1	KTFCHHLYEGQARG-MRXNPFEDSA-N	Naphthyl and Benzamide Derivative, 8	SARS Coronavirus Coronavirus Papain-Like Protease	Human SARS coronavirus (isolate Tor2)					10.1021/jm900611t	http://www.bindingdb.org/jsp/dbsearch/PrimarySearch_ki.jsp?energyterm=kJ/mole&tag=r21&monomerid=31517&enzyme=SARS+Coronavirus+Coronavirus+Papain-Like+Protease&column=ki&startPg=0&Increment=50&submit=Search	44235654			ZINC43021670
56761	CCC(NC(=O)c1ccccc1C)c1ccc2ccccc2c1	FLAJIDWIIUVVEB-UHFFFAOYSA-N	Naphthyl and Benzamide Derivative, 14::racemic	SARS Coronavirus Coronavirus Papain-Like Protease	Human SARS coronavirus (isolate Tor2)					10.1021/jm900611t	http://www.bindingdb.org/jsp/dbsearch/PrimarySearch_ki.jsp?energyterm=kJ/mole&tag=r21&monomerid=31518&enzyme=SARS+Coronavirus+Coronavirus+Papain-Like+Protease&column=ki&startPg=0&Increment=50&submit=Search	44235656			ZINC42920132
56762	Cc1ccccc1C(=O)NC(c1ccccc1)c1ccc2ccccc2c1	IJFADUOPHLKJQB-UHFFFAOYSA-N	Naphthyl and Benzamide Derivative, 17::racemic	SARS Coronavirus Coronavirus Papain-Like Protease	Human SARS coronavirus (isolate Tor2)					10.1021/jm900611t	http://www.bindingdb.org/jsp/dbsearch/PrimarySearch_ki.jsp?energyterm=kJ/mole&tag=r21&monomerid=31519&enzyme=SARS+Coronavirus+Coronavirus+Papain-Like+Protease&column=ki&startPg=0&Increment=50&submit=Search	44235657			ZINC43022192
56763	C[C@@H](NC(=O)c1ccccc1C)c1cccc2ccccc12	KHDFCIXDDKWNFL-OAHLLOKOSA-N	Naphthalene and Benzamide Derivative, 5h	SARS Coronavirus Coronavirus Papain-Like Protease	Human SARS coronavirus (isolate Tor2)		2300			10.1021/jm900611t	http://www.bindingdb.org/jsp/dbsearch/PrimarySearch_ki.jsp?energyterm=kJ/mole&tag=r21&monomerid=31520&enzyme=SARS+Coronavirus+Coronavirus+Papain-Like+Protease&column=ki&startPg=0&Increment=50&submit=Search	44235434			ZINC36735481
56764	C[C@@H](N(C)C(=O)c1ccccc1C)c1cccc2ccccc12	UENPHAHEZPFPCU-MRXNPFEDSA-N	Naphthalene and Benzamide Derivative, 21::med.21724, Compound 160	SARS Coronavirus Coronavirus Papain-Like Protease	Human SARS coronavirus (isolate Tor2)		22600			10.1021/jm900611t	http://www.bindingdb.org/jsp/dbsearch/PrimarySearch_ki.jsp?energyterm=kJ/mole&tag=r21&monomerid=31521&enzyme=SARS+Coronavirus+Coronavirus+Papain-Like+Protease&column=ki&startPg=0&Increment=50&submit=Search	44235658			ZINC43059603
56765	C[C@@H](NC(=O)c1ccc(N)cc1)c1cccc2ccccc12	FDZAZVZWUCGTFM-CYBMUJFWSA-N	Naphthalene and Benzamide Derivative, 23	SARS Coronavirus Coronavirus Papain-Like Protease	Human SARS coronavirus (isolate Tor2)		24800			10.1021/jm900611t	http://www.bindingdb.org/jsp/dbsearch/PrimarySearch_ki.jsp?energyterm=kJ/mole&tag=r21&monomerid=31522&enzyme=SARS+Coronavirus+Coronavirus+Papain-Like+Protease&column=ki&startPg=0&Increment=50&submit=Search	44236116			ZINC43019010
56766	C[C@@H](NC(=O)c1cc(NC(C)=O)ccc1C)c1cccc2ccccc12	KGPYBLOBHQLIET-OAHLLOKOSA-N	Compound 6::Naphthalene and Benzamide Derivative, 24::med.21724, Compound 162	SARS Coronavirus Coronavirus Papain-Like Protease	Human SARS coronavirus (isolate Tor2)		560			10.1021/jm900611t	http://www.bindingdb.org/jsp/dbsearch/PrimarySearch_ki.jsp?energyterm=kJ/mole&tag=r21&monomerid=31523&enzyme=SARS+Coronavirus+Coronavirus+Papain-Like+Protease&column=ki&startPg=0&Increment=50&submit=Search	44235889			ZINC43063887
56767	C[C@@H](NC(=O)c1cc(N)ccc1C)c1cccc2ccccc12	UVERBUNNCOKGNZ-CQSZACIVSA-N	5-amino-2-methyl-N-[(1R)-1-(naphthalen-1-yl)ethyl]benzamide (I-1)::AKOS015840255::GRL0617::Naphthalene and Benzamide Derivative, 25::med.21724, Compound 159	SARS Coronavirus Coronavirus Papain-Like Protease	Human SARS coronavirus (isolate Tor2)		2640			10.1021/jm900611t	http://www.bindingdb.org/jsp/dbsearch/PrimarySearch_ki.jsp?energyterm=kJ/mole&tag=r21&monomerid=31524&enzyme=SARS+Coronavirus+Coronavirus+Papain-Like+Protease&column=ki&startPg=0&Increment=50&submit=Search	24941262		DB08656	ZINC43012570
56768	Cc1ccc(N)cc1C(=O)NC(C)(C)c1cccc2ccccc12	PDOYWSZZBAEVAH-UHFFFAOYSA-N	Substituted Benzamide Derivative, 29::med.21724, Compound 161	SARS Coronavirus Coronavirus Papain-Like Protease	Human SARS coronavirus (isolate Tor2)		11100			10.1021/jm900611t	http://www.bindingdb.org/jsp/dbsearch/PrimarySearch_ki.jsp?energyterm=kJ/mole&tag=r21&monomerid=31525&enzyme=SARS+Coronavirus+Coronavirus+Papain-Like+Protease&column=ki&startPg=0&Increment=50&submit=Search	44235890			ZINC43019615
56769	C[C@@H](NC(=O)c1cc(ccc1C)C#N)c1cccc2ccccc12	GAYCAOYUHXSNTO-OAHLLOKOSA-N	Substituted Benzamide Derivative, 33	SARS Coronavirus Coronavirus Papain-Like Protease	Human SARS coronavirus (isolate Tor2)		5200			10.1021/jm900611t	http://www.bindingdb.org/jsp/dbsearch/PrimarySearch_ki.jsp?energyterm=kJ/mole&tag=r21&monomerid=31526&enzyme=SARS+Coronavirus+Coronavirus+Papain-Like+Protease&column=ki&startPg=0&Increment=50&submit=Search	44235891			ZINC43016026
56770	COCc1ccc(N)cc1C(=O)N[C@H](C)c1cccc2ccccc12	SESVQKDRNJHLMN-CQSZACIVSA-N	Substituted Benzamide Derivative, 40	SARS Coronavirus Coronavirus Papain-Like Protease	Human SARS coronavirus (isolate Tor2)		2700			10.1021/jm900611t	http://www.bindingdb.org/jsp/dbsearch/PrimarySearch_ki.jsp?energyterm=kJ/mole&tag=r21&monomerid=31527&enzyme=SARS+Coronavirus+Coronavirus+Papain-Like+Protease&column=ki&startPg=0&Increment=50&submit=Search	44236120			ZINC43019620
56771	C[C@@H](NC(=O)c1cc(I)ccc1C)c1cccc2ccccc12	FAPPSWGYSBFQHK-CQSZACIVSA-N	Substituted Benzamide Derivative, 32	SARS Coronavirus Coronavirus Papain-Like Protease	Human SARS coronavirus (isolate Tor2)		1400			10.1021/jm900611t	http://www.bindingdb.org/jsp/dbsearch/PrimarySearch_ki.jsp?energyterm=kJ/mole&tag=r21&monomerid=31528&enzyme=SARS+Coronavirus+Coronavirus+Papain-Like+Protease&column=ki&startPg=0&Increment=50&submit=Search	44236118			ZINC43017733
56772	C[C@@H](NC(=O)c1cc(CNC(=O)OC(C)(C)C)ccc1C)c1cccc2ccccc12	WFKRNMAWGCVMCU-GOSISDBHSA-N	Substituted Benzamide Derivative, 47	SARS Coronavirus Coronavirus Papain-Like Protease	Human SARS coronavirus (isolate Tor2)		4800			10.1021/jm900611t	http://www.bindingdb.org/jsp/dbsearch/PrimarySearch_ki.jsp?energyterm=kJ/mole&tag=r21&monomerid=31529&enzyme=SARS+Coronavirus+Coronavirus+Papain-Like+Protease&column=ki&startPg=0&Increment=50&submit=Search	44235895			ZINC43017739
56773	CNCc1ccc(C)c(c1)C(=O)N[C@H](C)c1cccc2ccccc12	SIBDAZDNSVDATL-MRXNPFEDSA-N	2-methyl-5-[(methylamino)methyl]-N-[(1R)-1-(naphthalen-1-yl)ethyl]benzamide (I-2)::Substituted Benzamide Derivative, 49::med.21724, Compound 164	SARS Coronavirus Coronavirus Papain-Like Protease	Human SARS coronavirus (isolate Tor2)		1300			10.1021/jm900611t	http://www.bindingdb.org/jsp/dbsearch/PrimarySearch_ki.jsp?energyterm=kJ/mole&tag=r21&monomerid=31530&enzyme=SARS+Coronavirus+Coronavirus+Papain-Like+Protease&column=ki&startPg=0&Increment=50&submit=Search	44236357			ZINC42922212
56774	C[C@@H](NC(=O)c1cc(CN)ccc1C)c1cccc2ccccc12	BIKTWHWUIKAJAT-OAHLLOKOSA-N	Substituted Benzamide Derivative, 2::med.21724, Compound 163	SARS Coronavirus Coronavirus Papain-Like Protease	Human SARS coronavirus (isolate Tor2)		460			10.1021/jm900611t	http://www.bindingdb.org/jsp/dbsearch/PrimarySearch_ki.jsp?energyterm=kJ/mole&tag=r21&monomerid=31531&enzyme=SARS+Coronavirus+Coronavirus+Papain-Like+Protease&column=ki&startPg=0&Increment=50&submit=Search	44236114			ZINC43071312
111449	Nc1ccccc1C(=O)On1nnc2ccccc12	JPKNQONFNZKKLX-UHFFFAOYSA-N	Benzotriazole ester, 3::med.21724, Compound 88	3C-like proteinase (3CL-PRO)	Human SARS coronavirus	19.5				10.1016/j.chembiol.2005.12.008	http://www.bindingdb.org/jsp/dbsearch/PrimarySearch_ki.jsp?energyterm=kJ/mole&tag=r21&monomerid=59237&enzyme=3C-like+proteinase+%283CL-PRO%29&column=ki&startPg=0&Increment=50&submit=Search	15959235			ZINC59426271
111450	CN(C)c1ccc(cc1)C(=O)On1nnc2ccccc12	UOITWBIZHQLMTH-UHFFFAOYSA-N	Benzotriazole ester, 4::med.21724, Compound 89	3C-like proteinase (3CL-PRO)	Human SARS coronavirus	17.4				10.1016/j.chembiol.2005.12.008	http://www.bindingdb.org/jsp/dbsearch/PrimarySearch_ki.jsp?energyterm=kJ/mole&tag=r21&monomerid=59238&enzyme=3C-like+proteinase+%283CL-PRO%29&column=ki&startPg=0&Increment=50&submit=Search	15959236			ZINC59426275
111451	CNc1ccc(cc1)C(=O)On1nnc2ccccc12	JXCSDPIXSVMCBQ-UHFFFAOYSA-N	Benzotriazole ester, 5	3C-like proteinase (3CL-PRO)	Human SARS coronavirus	12.1				10.1016/j.chembiol.2005.12.008	http://www.bindingdb.org/jsp/dbsearch/PrimarySearch_ki.jsp?energyterm=kJ/mole&tag=r21&monomerid=59239&enzyme=3C-like+proteinase+%283CL-PRO%29&column=ki&startPg=0&Increment=50&submit=Search	15959237			ZINC59426276
111452	CCN(CC)c1ccc(cc1)C(=O)On1nnc2ccccc12	UMVUTRLLCXJRMI-UHFFFAOYSA-N	Benzotriazole ester, 6	3C-like proteinase (3CL-PRO)	Human SARS coronavirus	11.1				10.1016/j.chembiol.2005.12.008	http://www.bindingdb.org/jsp/dbsearch/PrimarySearch_ki.jsp?energyterm=kJ/mole&tag=r21&monomerid=59240&enzyme=3C-like+proteinase+%283CL-PRO%29&column=ki&startPg=0&Increment=50&submit=Search	15959238			ZINC59426278
111453	O=C(On1nnc2ccccc12)c1ccc2nc[nH]c2c1	ZVXNOBBLRBKRCE-UHFFFAOYSA-N	Benzotriazole ester, 7	3C-like proteinase (3CL-PRO)	Human SARS coronavirus	22.9				10.1016/j.chembiol.2005.12.008	http://www.bindingdb.org/jsp/dbsearch/PrimarySearch_ki.jsp?energyterm=kJ/mole&tag=r21&monomerid=59241&enzyme=3C-like+proteinase+%283CL-PRO%29&column=ki&startPg=0&Increment=50&submit=Search	15959239			ZINC59426280
111454	O=C(On1nnc2ccccc12)c1ccc2[nH]ccc2c1	YPFWNRLSYPAVJB-UHFFFAOYSA-N	Benzotriazole ester, 8::med.21724, Compound 91	3C-like proteinase (3CL-PRO)	Human SARS coronavirus	7.5				10.1016/j.chembiol.2005.12.008	http://www.bindingdb.org/jsp/dbsearch/PrimarySearch_ki.jsp?energyterm=kJ/mole&tag=r21&monomerid=59242&enzyme=3C-like+proteinase+%283CL-PRO%29&column=ki&startPg=0&Increment=50&submit=Search	15959240			ZINC49888654
111455	O=C(On1nnc2ccccc12)c1cc2ccccc2[nH]1	ZDPADJJUIZEJSZ-UHFFFAOYSA-N	Benzotriazole ester, 9	3C-like proteinase (3CL-PRO)	Human SARS coronavirus	12.3				10.1016/j.chembiol.2005.12.008	http://www.bindingdb.org/jsp/dbsearch/PrimarySearch_ki.jsp?energyterm=kJ/mole&tag=r21&monomerid=59243&enzyme=3C-like+proteinase+%283CL-PRO%29&column=ki&startPg=0&Increment=50&submit=Search	15959241			ZINC59426283
111456	Fc1ccc2[nH]c(cc2c1)C(=O)On1nnc2ccccc12	PAEPADFRKKOUIH-UHFFFAOYSA-N	Benzotriazole ester, 10	3C-like proteinase (3CL-PRO)	Human SARS coronavirus	13.8				10.1016/j.chembiol.2005.12.008	http://www.bindingdb.org/jsp/dbsearch/PrimarySearch_ki.jsp?energyterm=kJ/mole&tag=r21&monomerid=59244&enzyme=3C-like+proteinase+%283CL-PRO%29&column=ki&startPg=0&Increment=50&submit=Search	15959242			ZINC59426284
111457	O=C(Cn1nnc2ccccc12)c1ccc(cc1)N(=O)=O	XJLCWAVWERRVAR-UHFFFAOYSA-N	Benzotriazole ester, 13	3C-like proteinase (3CL-PRO)	Human SARS coronavirus		>5.0e+4			10.1016/j.chembiol.2005.12.008	http://www.bindingdb.org/jsp/dbsearch/PrimarySearch_ki.jsp?energyterm=kJ/mole&tag=r21&monomerid=59245&enzyme=3C-like+proteinase+%283CL-PRO%29&column=ki&startPg=0&Increment=50&submit=Search	677493			ZINC00041168
111458	CCN(CC)c1ccc(cc1)C(=O)Cn1nnc2ccccc12	WRMOHNVAGALKPX-UHFFFAOYSA-N	Benzotriazole ester, 14	3C-like proteinase (3CL-PRO)	Human SARS coronavirus	1.0e+3				10.1016/j.chembiol.2005.12.008	http://www.bindingdb.org/jsp/dbsearch/PrimarySearch_ki.jsp?energyterm=kJ/mole&tag=r21&monomerid=59246&enzyme=3C-like+proteinase+%283CL-PRO%29&column=ki&startPg=0&Increment=50&submit=Search	15959243			ZINC34821662
111459	Nc1ccc(cc1)C(=O)Cn1nnc2ccccc12	PPIIXUVTRPOFDW-UHFFFAOYSA-N	Benzotriazole ester, 15	3C-like proteinase (3CL-PRO)	Human SARS coronavirus		>5.0e+4			10.1016/j.chembiol.2005.12.008	http://www.bindingdb.org/jsp/dbsearch/PrimarySearch_ki.jsp?energyterm=kJ/mole&tag=r21&monomerid=59247&enzyme=3C-like+proteinase+%283CL-PRO%29&column=ki&startPg=0&Increment=50&submit=Search	15959244			ZINC34821664
111460	Nc1ccc(cc1)C(O)Cn1nnc2ccccc12	OBFQUALJHCJLCJ-UHFFFAOYSA-N	Benzotriazole ester, 16	3C-like proteinase (3CL-PRO)	Human SARS coronavirus		>5.0e+4			10.1016/j.chembiol.2005.12.008	http://www.bindingdb.org/jsp/dbsearch/PrimarySearch_ki.jsp?energyterm=kJ/mole&tag=r21&monomerid=59248&enzyme=3C-like+proteinase+%283CL-PRO%29&column=ki&startPg=0&Increment=50&submit=Search	15959245			ZINC34821668
111461	CNc1ccc(cc1)C(=O)Cn1nnc2ccccc12	VMXNOKTVCNUECJ-UHFFFAOYSA-N	Benzotriazole ester, 17	3C-like proteinase (3CL-PRO)	Human SARS coronavirus	4.5e+3				10.1016/j.chembiol.2005.12.008	http://www.bindingdb.org/jsp/dbsearch/PrimarySearch_ki.jsp?energyterm=kJ/mole&tag=r21&monomerid=59249&enzyme=3C-like+proteinase+%283CL-PRO%29&column=ki&startPg=0&Increment=50&submit=Search	15959246			ZINC34821670
111462	CN(C)c1ccc(cc1)C(=O)Cn1nnc2ccccc12	ARWVNIIKICSUOA-UHFFFAOYSA-N	Benzotriazole ester, 18	3C-like proteinase (3CL-PRO)	Human SARS coronavirus	6.7e+3				10.1016/j.chembiol.2005.12.008	http://www.bindingdb.org/jsp/dbsearch/PrimarySearch_ki.jsp?energyterm=kJ/mole&tag=r21&monomerid=59250&enzyme=3C-like+proteinase+%283CL-PRO%29&column=ki&startPg=0&Increment=50&submit=Search	15959247			ZINC34821672
111463	CNc1ccc(cc1)C(O)Cn1nnc2ccccc12	BZISPZAAVWUUHC-UHFFFAOYSA-N	Benzotriazole ester, 19	3C-like proteinase (3CL-PRO)	Human SARS coronavirus	>5.0e+4				10.1016/j.chembiol.2005.12.008	http://www.bindingdb.org/jsp/dbsearch/PrimarySearch_ki.jsp?energyterm=kJ/mole&tag=r21&monomerid=59251&enzyme=3C-like+proteinase+%283CL-PRO%29&column=ki&startPg=0&Increment=50&submit=Search	15959248			ZINC34821676
111464	CN(C)c1ccc(cc1)C(O)Cn1nnc2ccccc12	NUSWVZRFMFNTTJ-UHFFFAOYSA-N	Benzotriazole ester, 20	3C-like proteinase (3CL-PRO)	Human SARS coronavirus	>5.0e+4				10.1016/j.chembiol.2005.12.008	http://www.bindingdb.org/jsp/dbsearch/PrimarySearch_ki.jsp?energyterm=kJ/mole&tag=r21&monomerid=59252&enzyme=3C-like+proteinase+%283CL-PRO%29&column=ki&startPg=0&Increment=50&submit=Search	15959249			ZINC34821680
200721	CCOC(=O)\C=C\[C@H](C[C@@H]1CCNC1=O)NC(=O)[C@H](CC(C)C)NC(=O)[C@@H](NC(=O)OCc1ccccc1)C(C)OC(C)(C)C	PWBQMVUCCVWDEJ-YVSZZSSPSA-N	N-[(benzyloxy)carbonyl]-O-(tert-butyl)-L-threonyl-N1-((1S,2E)-4-ethoxy-4-oxo-1-{[(3S)-2-oxopyrrolidin-3-yl]methyl}but-2-enyl)-L-leucinamide::TG-0203770::TG-0205221 Analogue 4::ethyl (2E,4S)-4-[(2S)-2-[(2S,3S)-2-{[(benzyloxy)carbonyl]amino}-3-(tert-butoxy)butanamido]-4-methylpentanamido]-5-[(3S)-2-oxopyrrolidin-3-yl]pent-2-enoate	3C-like proteinase (3CL-PRO)	Human SARS coronavirus	58				10.1074/jbc.M807947200	http://www.bindingdb.org/jsp/dbsearch/PrimarySearch_ki.jsp?energyterm=kJ/mole&tag=r21&monomerid=11232&enzyme=3C-like+proteinase+%283CL-PRO%29&column=ki&startPg=0&Increment=50&submit=Search	11786957			ZINC14947865
200722	CC(C)C[C@H](NC(=O)[C@H](CNC(=O)C(C)(C)C)NC(=O)OCc1ccccc1)C(=O)NC(C[C@@H]1CCNC1=O)=CCC(C)=O	UMTSVVFRJWDHKP-RNXOBYDBSA-N	TG-0204998	3C-like proteinase (3CL-PRO)	Human SARS coronavirus	38				10.1074/jbc.M807947200	http://www.bindingdb.org/jsp/dbsearch/PrimarySearch_ki.jsp?energyterm=kJ/mole&tag=r21&monomerid=92520&enzyme=3C-like+proteinase+%283CL-PRO%29&column=ki&startPg=0&Increment=50&submit=Search	91899429			ZINC89469628
200723	C[C@H](OC(C)(C)C)[C@H](NC(=O)OCc1ccccc1)C(=O)N[C@@H](CC1CCCCC1)C(=O)N[C@@H](C[C@@H]1CCNC1=O)C=O	YFUZVOLEKQFVCQ-SJSXQSQASA-N	N-[(benzyloxy)carbonyl]-O-(tert-butyl)-L-threonyl-3-cyclohexyl-N1-{(1S)-1-formyl-2-[(3S)-2-oxopyrrolidin-3-yl]ethyl}-L-alaninamide::TG-0205221::benzyl N-[(1S,2S)-2-(tert-butoxy)-1-{[(1S)-2-cyclohexyl-1-{[(2S)-1-oxo-3-[(3S)-2-oxopyrrolidin-3-yl]propan-2-yl]carbamoyl}ethyl]carbamoyl}propyl]carbamate	3C-like proteinase (3CL-PRO)	Human SARS coronavirus	54				10.1074/jbc.M807947200	http://www.bindingdb.org/jsp/dbsearch/PrimarySearch_ki.jsp?energyterm=kJ/mole&tag=r21&monomerid=11233&enzyme=3C-like+proteinase+%283CL-PRO%29&column=ki&startPg=0&Increment=50&submit=Search	91895789			ZINC14947873
200724	CC(C)C[C@H](NC(=O)[C@@H](NC(=O)OCc1ccccc1)C(C)OC(C)(C)C)C(=O)NC(C[C@@H]1CCNC1=O)=CCC(=O)C1CC1	DYJPFWSTGIYMHT-LSYYVZCESA-N	TG-0205486	3C-like proteinase (3CL-PRO)	Human SARS coronavirus	99				10.1074/jbc.M807947200	http://www.bindingdb.org/jsp/dbsearch/PrimarySearch_ki.jsp?energyterm=kJ/mole&tag=r21&monomerid=92521&enzyme=3C-like+proteinase+%283CL-PRO%29&column=ki&startPg=0&Increment=50&submit=Search	91899430			ZINC89469632
296634	Nc1ncnc2[nH]c(nc12)C(F)(F)F	LMWFSHBVFKCMHW-UHFFFAOYSA-N	8-(trifluoromethyl)-9H-purin-6-amine (4)::jm5b01461, Compound 188	SARS Coronavirus Coronavirus Papain-Like Protease	Human SARS coronavirus (isolate Tor2)	1.15e+4	1.09e+4			10.1021/cb500917m	http://www.bindingdb.org/jsp/dbsearch/PrimarySearch_ki.jsp?energyterm=kJ/mole&tag=r21&monomerid=154573&enzyme=SARS+Coronavirus+Coronavirus+Papain-Like+Protease&column=ki&startPg=0&Increment=50&submit=Search	3635406
296636	C[C@@H](NC(=O)c1cc(N)ccc1C)c1cccc2ccccc12	UVERBUNNCOKGNZ-CQSZACIVSA-N	5-amino-2-methyl-N-[(1R)-1-(naphthalen-1-yl)ethyl]benzamide (I-1)::AKOS015840255::GRL0617::Naphthalene and Benzamide Derivative, 25::med.21724, Compound 159	SARS Coronavirus Coronavirus Papain-Like Protease	Human SARS coronavirus (isolate Tor2)		2.3e+2			10.1021/cb500917m	http://www.bindingdb.org/jsp/dbsearch/PrimarySearch_ki.jsp?energyterm=kJ/mole&tag=r21&monomerid=31524&enzyme=SARS+Coronavirus+Coronavirus+Papain-Like+Protease&column=ki&startPg=0&Increment=50&submit=Search	24941262		DB08656	ZINC43012570
296637	CNCc1ccc(C)c(c1)C(=O)N[C@H](C)c1cccc2ccccc12	SIBDAZDNSVDATL-MRXNPFEDSA-N	2-methyl-5-[(methylamino)methyl]-N-[(1R)-1-(naphthalen-1-yl)ethyl]benzamide (I-2)::Substituted Benzamide Derivative, 49::med.21724, Compound 164	SARS Coronavirus Coronavirus Papain-Like Protease	Human SARS coronavirus (isolate Tor2)		1.18e+3			10.1021/cb500917m	http://www.bindingdb.org/jsp/dbsearch/PrimarySearch_ki.jsp?energyterm=kJ/mole&tag=r21&monomerid=31530&enzyme=SARS+Coronavirus+Coronavirus+Papain-Like+Protease&column=ki&startPg=0&Increment=50&submit=Search	44236357			ZINC42922212
296638	C[C@@H](N1CCC(CC1)C(=O)NCc1ccc2OCOc2c1)c1cccc2ccccc12	IVXBCFLWMPMSAP-GOSISDBHSA-N	CHEMBL1173044::GRL-0667::N-(2H-1,3-benzodioxol-5-ylmethyl)-1-[(1R)-1-(naphthalen-1-yl)ethyl]piperidine-4-carboxamide (I-3)::med.21724, Compound 165	SARS Coronavirus Coronavirus Papain-Like Protease	Human SARS coronavirus (isolate Tor2)		9.8e+2			10.1021/cb500917m	http://www.bindingdb.org/jsp/dbsearch/PrimarySearch_ki.jsp?energyterm=kJ/mole&tag=r21&monomerid=50007789&enzyme=SARS+Coronavirus+Coronavirus+Papain-Like+Protease&column=ki&startPg=0&Increment=50&submit=Search	46174170	CHEMBL1173044		ZINC28757865
296639	C[C@H](N1CCC(CC1)C(=O)NCc1ccc2OCOc2c1)c1cccc2ccccc12	IVXBCFLWMPMSAP-SFHVURJKSA-N	N-(2H-1,3-benzodioxol-5-ylmethyl)-1-[(1S)-1-(naphthalen-1-yl)ethyl]piperidine-4-carboxamide (I-4)::med.21724, Compound 166	SARS Coronavirus Coronavirus Papain-Like Protease	Human SARS coronavirus (isolate Tor2)		2.26e+3			10.1021/cb500917m	http://www.bindingdb.org/jsp/dbsearch/PrimarySearch_ki.jsp?energyterm=kJ/mole&tag=r21&monomerid=154574&enzyme=SARS+Coronavirus+Coronavirus+Papain-Like+Protease&column=ki&startPg=0&Increment=50&submit=Search	46178558
296640	CCOc1cccc2cc(oc12)-c1nnc(NC(=O)c2sc3ccccc3c2Cl)o1	NLBCQZKALXFHOX-UHFFFAOYSA-N	3-chloro-N-[5-(7-ethoxy-1-benzofuran-2-yl)-1,3,4-oxadiazol-2-yl]-1-benzothiophene-2-carboxamide (3)	SARS Coronavirus Coronavirus Papain-Like Protease	Human SARS coronavirus (isolate Tor2)			3.14e+4		10.1021/cb500917m	http://www.bindingdb.org/jsp/dbsearch/PrimarySearch_ki.jsp?energyterm=kJ/mole&tag=r21&monomerid=154575&enzyme=SARS+Coronavirus+Coronavirus+Papain-Like+Protease&column=ki&startPg=0&Increment=50&submit=Search	40957125
296642	Nc1ncnc2[nH]c(nc12)C(F)(F)F	LMWFSHBVFKCMHW-UHFFFAOYSA-N	8-(trifluoromethyl)-9H-purin-6-amine (4)::jm5b01461, Compound 188	SARS Coronavirus Coronavirus Papain-Like Protease	Human SARS coronavirus (isolate Tor2)			2.63e+4		10.1021/cb500917m	http://www.bindingdb.org/jsp/dbsearch/PrimarySearch_ki.jsp?energyterm=kJ/mole&tag=r21&monomerid=154573&enzyme=SARS+Coronavirus+Coronavirus+Papain-Like+Protease&column=ki&startPg=0&Increment=50&submit=Search	3635406
296645	C[C@@H](N1CCC(CC1)C(=O)NCc1ccc2OCOc2c1)c1cccc2ccccc12	IVXBCFLWMPMSAP-GOSISDBHSA-N	CHEMBL1173044::GRL-0667::N-(2H-1,3-benzodioxol-5-ylmethyl)-1-[(1R)-1-(naphthalen-1-yl)ethyl]piperidine-4-carboxamide (I-3)::med.21724, Compound 165	SARS Coronavirus Coronavirus Papain-Like Protease	Human SARS coronavirus (isolate Tor2)		1.2e+3			10.1021/cb500917m	http://www.bindingdb.org/jsp/dbsearch/PrimarySearch_ki.jsp?energyterm=kJ/mole&tag=r21&monomerid=50007789&enzyme=SARS+Coronavirus+Coronavirus+Papain-Like+Protease&column=ki&startPg=0&Increment=50&submit=Search	46174170	CHEMBL1173044		ZINC28757865
848346	CC(C)C(=O)Nc1ccc(cc1)N(C(C(=O)NCc1ccccc1)c1cccc(F)c1)C(=O)Cn1nnc2ccccc12	PGBBZORGQALHAL-UHFFFAOYSA-N	US9975885, Compound 1P	3C-like proteinase (3CL-PRO)	Human SARS coronavirus		1600				http://www.bindingdb.org/jsp/dbsearch/PrimarySearch_ki.jsp?energyterm=kJ/mole&tag=r21&monomerid=420337&enzyme=3C-like+proteinase+%283CL-PRO%29&column=ki&startPg=0&Increment=50&submit=Search
848353	CC(C)C(=O)Nc1ccc(cc1)N(C(C(=O)NCc1cccnc1)c1cccc(F)c1)C(=O)Cn1nnc2ccccc12	BCLPVHKOPFIRMW-UHFFFAOYSA-N	US9975885, Compound 6	3C-like proteinase (3CL-PRO)	Human SARS coronavirus		5500				http://www.bindingdb.org/jsp/dbsearch/PrimarySearch_ki.jsp?energyterm=kJ/mole&tag=r21&monomerid=420349&enzyme=3C-like+proteinase+%283CL-PRO%29&column=ki&startPg=0&Increment=50&submit=Search
848357	COc1ccc(cc1)C(N(C(=O)Cn1nnc2ccccc12)c1ccc(NC(=O)C(C)C)cc1)C(=O)NCc1ccccc1	WVRHRIIJMNGVEN-UHFFFAOYSA-N	US9975885, Compound 13	3C-like proteinase (3CL-PRO)	Human SARS coronavirus		1100				http://www.bindingdb.org/jsp/dbsearch/PrimarySearch_ki.jsp?energyterm=kJ/mole&tag=r21&monomerid=420352&enzyme=3C-like+proteinase+%283CL-PRO%29&column=ki&startPg=0&Increment=50&submit=Search
848361	COc1cccc(c1)C(N(C(=O)Cn1nnc2ccccc12)c1ccc(NC(=O)C(C)C)cc1)C(=O)NCc1ccccc1	WSRFNUOBXQNQBG-UHFFFAOYSA-N	US9975885, Compound 14	3C-like proteinase (3CL-PRO)	Human SARS coronavirus		3500				http://www.bindingdb.org/jsp/dbsearch/PrimarySearch_ki.jsp?energyterm=kJ/mole&tag=r21&monomerid=420363&enzyme=3C-like+proteinase+%283CL-PRO%29&column=ki&startPg=0&Increment=50&submit=Search
848364	CC(C)C(=O)Nc1ccc(cc1)N(C(C(=O)NCc1ccccc1)c1cccnc1)C(=O)Cn1nnc2ccccc12	WZYXFLGBGJLBDC-UHFFFAOYSA-N	US9975885, Compound 15	3C-like proteinase (3CL-PRO)	Human SARS coronavirus		10900				http://www.bindingdb.org/jsp/dbsearch/PrimarySearch_ki.jsp?energyterm=kJ/mole&tag=r21&monomerid=420954&enzyme=3C-like+proteinase+%283CL-PRO%29&column=ki&startPg=0&Increment=50&submit=Search
848368	CC(C)C(=O)Nc1ccc(cc1)N(C(C(=O)NCc1ccccc1)c1ccc(OCCCN(C)C)cc1)C(=O)Cn1nnc2ccccc12	YPWURQJIKWXHJG-UHFFFAOYSA-N	US9975885, Compound 54	3C-like proteinase (3CL-PRO)	Human SARS coronavirus		27300				http://www.bindingdb.org/jsp/dbsearch/PrimarySearch_ki.jsp?energyterm=kJ/mole&tag=r21&monomerid=420955&enzyme=3C-like+proteinase+%283CL-PRO%29&column=ki&startPg=0&Increment=50&submit=Search
848369	CC(C)C(=O)Nc1ccc(cc1)N(C(C(=O)NCc1ccccc1)c1ccc(Cl)c(F)c1)C(=O)Cn1nnc2ccccc12	ISHXMYLDUPUTFN-UHFFFAOYSA-N	US9975885, Compound 55	3C-like proteinase (3CL-PRO)	Human SARS coronavirus		800				http://www.bindingdb.org/jsp/dbsearch/PrimarySearch_ki.jsp?energyterm=kJ/mole&tag=r21&monomerid=420957&enzyme=3C-like+proteinase+%283CL-PRO%29&column=ki&startPg=0&Increment=50&submit=Search
848375	CC(C)(C)NC(=O)C(N(C(=O)Cn1nnc2ccccc12)c1ccc(NC(=O)C2CC2)cc1)c1ccsc1	XWLONETVJPZQKQ-UHFFFAOYSA-N	US9975885, Compound 2P	3C-like proteinase (3CL-PRO)	Human SARS coronavirus		8900				http://www.bindingdb.org/jsp/dbsearch/PrimarySearch_ki.jsp?energyterm=kJ/mole&tag=r21&monomerid=420961&enzyme=3C-like+proteinase+%283CL-PRO%29&column=ki&startPg=0&Increment=50&submit=Search
848383	CC(C)NC(=O)C(N(C(=O)Cn1nnc2ccccc12)c1ccc(NC(=O)C2CC2)cc1)c1ccsc1	DHKBFPSKHJNVEF-UHFFFAOYSA-N	US9975885, Compound 29	3C-like proteinase (3CL-PRO)	Human SARS coronavirus		8300				http://www.bindingdb.org/jsp/dbsearch/PrimarySearch_ki.jsp?energyterm=kJ/mole&tag=r21&monomerid=420973&enzyme=3C-like+proteinase+%283CL-PRO%29&column=ki&startPg=0&Increment=50&submit=Search
848389	CC(C)CNC(=O)C(N(C(=O)Cn1nnc2ccccc12)c1ccc(NC(=O)C2CC2)cc1)c1ccsc1	WUCWUEUMJJFMDQ-UHFFFAOYSA-N	US9975885, Compound 30	3C-like proteinase (3CL-PRO)	Human SARS coronavirus		10500				http://www.bindingdb.org/jsp/dbsearch/PrimarySearch_ki.jsp?energyterm=kJ/mole&tag=r21&monomerid=420974&enzyme=3C-like+proteinase+%283CL-PRO%29&column=ki&startPg=0&Increment=50&submit=Search
848394	CC(C)(C)CNC(=O)C(N(C(=O)Cn1nnc2ccccc12)c1ccc(NC(=O)C2CC2)cc1)c1ccsc1	VBVYKHHWNTWNAF-UHFFFAOYSA-N	US9975885, Compound 31	3C-like proteinase (3CL-PRO)	Human SARS coronavirus		4200				http://www.bindingdb.org/jsp/dbsearch/PrimarySearch_ki.jsp?energyterm=kJ/mole&tag=r21&monomerid=420975&enzyme=3C-like+proteinase+%283CL-PRO%29&column=ki&startPg=0&Increment=50&submit=Search
848400	O=C(Cn1nnc2ccccc12)N(C(C(=O)NC1CC1)c1ccsc1)c1ccc(NC(=O)C2CC2)cc1	VIJXGBYPKYPHCY-UHFFFAOYSA-N	US9975885, Compound 32	3C-like proteinase (3CL-PRO)	Human SARS coronavirus		8200				http://www.bindingdb.org/jsp/dbsearch/PrimarySearch_ki.jsp?energyterm=kJ/mole&tag=r21&monomerid=420977&enzyme=3C-like+proteinase+%283CL-PRO%29&column=ki&startPg=0&Increment=50&submit=Search
848405	O=C(Cn1nnc2ccccc12)N(C(C(=O)NC1CCCC1)c1ccsc1)c1ccc(NC(=O)C2CC2)cc1	ZZQICCIBXSGDRY-UHFFFAOYSA-N	US9975885, Compound 33	3C-like proteinase (3CL-PRO)	Human SARS coronavirus		4200				http://www.bindingdb.org/jsp/dbsearch/PrimarySearch_ki.jsp?energyterm=kJ/mole&tag=r21&monomerid=420978&enzyme=3C-like+proteinase+%283CL-PRO%29&column=ki&startPg=0&Increment=50&submit=Search
848412	O=C(Cn1nnc2ccccc12)N(C(C(=O)NCc1cccnc1)c1ccsc1)c1ccc(NC(=O)C2CC2)cc1	RERUNYXDNHORRJ-UHFFFAOYSA-N	US9975885, Compound 34	3C-like proteinase (3CL-PRO)	Human SARS coronavirus		9900				http://www.bindingdb.org/jsp/dbsearch/PrimarySearch_ki.jsp?energyterm=kJ/mole&tag=r21&monomerid=420979&enzyme=3C-like+proteinase+%283CL-PRO%29&column=ki&startPg=0&Increment=50&submit=Search
848417	O=C(Cn1nnc2ccccc12)N(C(C(=O)NCc1ccccc1)c1ccsc1)c1ccc(NC(=O)C2CC2)cc1	MOOGDCUJJKYCSA-UHFFFAOYSA-N	US9975885, Compound 37	3C-like proteinase (3CL-PRO)	Human SARS coronavirus		2000				http://www.bindingdb.org/jsp/dbsearch/PrimarySearch_ki.jsp?energyterm=kJ/mole&tag=r21&monomerid=420980&enzyme=3C-like+proteinase+%283CL-PRO%29&column=ki&startPg=0&Increment=50&submit=Search
848425	CC(C)(C)OC(=O)CNC(=O)C(N(C(=O)Cn1nnc2ccccc12)c1ccc(NC(=O)C2CC2)cc1)c1ccsc1	JGDZVBCZHOGHIW-UHFFFAOYSA-N	US9975885, Compound 64	3C-like proteinase (3CL-PRO)	Human SARS coronavirus		6300				http://www.bindingdb.org/jsp/dbsearch/PrimarySearch_ki.jsp?energyterm=kJ/mole&tag=r21&monomerid=420981&enzyme=3C-like+proteinase+%283CL-PRO%29&column=ki&startPg=0&Increment=50&submit=Search
848435	CC(C)(C)NC(=O)C(N(C(=O)c1c[nH]cn1)c1ccc(cc1)C(C)(C)C)c1cccnc1		US9975885, Compound 3P::med.21724, Compound 125	3C-like proteinase (3CL-PRO)	Human SARS coronavirus		6200				http://www.bindingdb.org/jsp/dbsearch/PrimarySearch_ki.jsp?energyterm=kJ/mole&tag=r21&monomerid=420983&enzyme=3C-like+proteinase+%283CL-PRO%29&column=ki&startPg=0&Increment=50&submit=Search
848443	CC(C)Cc1ccc(cc1)N(C(C(=O)NC(C)(C)C)c1cccnc1)C(=O)c1c[nH]cn1		US9975885, Compound 38	3C-like proteinase (3CL-PRO)	Human SARS coronavirus		7000				http://www.bindingdb.org/jsp/dbsearch/PrimarySearch_ki.jsp?energyterm=kJ/mole&tag=r21&monomerid=420985&enzyme=3C-like+proteinase+%283CL-PRO%29&column=ki&startPg=0&Increment=50&submit=Search
848449	CC(C)(C)NC(=O)C(N(C(=O)c1c[nH]cn1)c1ccc(cc1)C1CC1)c1cccnc1		US9975885, Compound 39	3C-like proteinase (3CL-PRO)	Human SARS coronavirus		12700				http://www.bindingdb.org/jsp/dbsearch/PrimarySearch_ki.jsp?energyterm=kJ/mole&tag=r21&monomerid=420986&enzyme=3C-like+proteinase+%283CL-PRO%29&column=ki&startPg=0&Increment=50&submit=Search
848456	CC(C)(C)NC(=O)C(N(C(=O)c1c[nH]cn1)c1ccc(cc1)C1CCC1)c1cccnc1		US9975885, Compound 40	3C-like proteinase (3CL-PRO)	Human SARS coronavirus		9900				http://www.bindingdb.org/jsp/dbsearch/PrimarySearch_ki.jsp?energyterm=kJ/mole&tag=r21&monomerid=420987&enzyme=3C-like+proteinase+%283CL-PRO%29&column=ki&startPg=0&Increment=50&submit=Search
848463	CC(C)(C)NC(=O)C(N(C(=O)c1c[nH]cn1)c1ccc(cc1)C1CCCC1)c1cccnc1		US9975885, Compound 41	3C-like proteinase (3CL-PRO)	Human SARS coronavirus		5300				http://www.bindingdb.org/jsp/dbsearch/PrimarySearch_ki.jsp?energyterm=kJ/mole&tag=r21&monomerid=420988&enzyme=3C-like+proteinase+%283CL-PRO%29&column=ki&startPg=0&Increment=50&submit=Search
848470	CC(C)(C)NC(=O)C(N(C(=O)c1c[nH]cn1)c1ccc(cc1)C1CCCCC1)c1cccnc1		US9975885, Compound 42	3C-like proteinase (3CL-PRO)	Human SARS coronavirus		6300				http://www.bindingdb.org/jsp/dbsearch/PrimarySearch_ki.jsp?energyterm=kJ/mole&tag=r21&monomerid=420989&enzyme=3C-like+proteinase+%283CL-PRO%29&column=ki&startPg=0&Increment=50&submit=Search
848478	CC(C)CNC(=O)C(N(C(=O)c1c[nH]cn1)c1ccc(cc1)C(C)(C)C)c1cccnc1		US9975885, Compound 43	3C-like proteinase (3CL-PRO)	Human SARS coronavirus		5900				http://www.bindingdb.org/jsp/dbsearch/PrimarySearch_ki.jsp?energyterm=kJ/mole&tag=r21&monomerid=420990&enzyme=3C-like+proteinase+%283CL-PRO%29&column=ki&startPg=0&Increment=50&submit=Search
848487	CC(C)(C)CNC(=O)C(N(C(=O)c1c[nH]cn1)c1ccc(cc1)C(C)(C)C)c1cccnc1		US9975885, Compound 44	3C-like proteinase (3CL-PRO)	Human SARS coronavirus		6300				http://www.bindingdb.org/jsp/dbsearch/PrimarySearch_ki.jsp?energyterm=kJ/mole&tag=r21&monomerid=420991&enzyme=3C-like+proteinase+%283CL-PRO%29&column=ki&startPg=0&Increment=50&submit=Search
848496	CC(C)(C)c1ccc(cc1)N(C(C(=O)NC1CC1)c1cccnc1)C(=O)c1c[nH]cn1		US9975885, Compound 46	3C-like proteinase (3CL-PRO)	Human SARS coronavirus		11800				http://www.bindingdb.org/jsp/dbsearch/PrimarySearch_ki.jsp?energyterm=kJ/mole&tag=r21&monomerid=420992&enzyme=3C-like+proteinase+%283CL-PRO%29&column=ki&startPg=0&Increment=50&submit=Search
848504	CC(C)(C)c1ccc(cc1)N(C(C(=O)NC1CCCC1)c1cccnc1)C(=O)c1c[nH]cn1		US9975885, Compound 47	3C-like proteinase (3CL-PRO)	Human SARS coronavirus		1700				http://www.bindingdb.org/jsp/dbsearch/PrimarySearch_ki.jsp?energyterm=kJ/mole&tag=r21&monomerid=420993&enzyme=3C-like+proteinase+%283CL-PRO%29&column=ki&startPg=0&Increment=50&submit=Search
848513	CC(C)(C)c1ccc(cc1)N(C(C(=O)NCc1ccccc1)c1cccnc1)C(=O)c1c[nH]cn1		US9975885, Compound 48	3C-like proteinase (3CL-PRO)	Human SARS coronavirus		6600				http://www.bindingdb.org/jsp/dbsearch/PrimarySearch_ki.jsp?energyterm=kJ/mole&tag=r21&monomerid=420994&enzyme=3C-like+proteinase+%283CL-PRO%29&column=ki&startPg=0&Increment=50&submit=Search
848522	CC(C)(C)c1ccc(cc1)N(C(C(=O)NC1CCCCC1)c1cccnc1)C(=O)c1c[nH]cn1		US9975885, Compound 77	3C-like proteinase (3CL-PRO)	Human SARS coronavirus		2300				http://www.bindingdb.org/jsp/dbsearch/PrimarySearch_ki.jsp?energyterm=kJ/mole&tag=r21&monomerid=420996&enzyme=3C-like+proteinase+%283CL-PRO%29&column=ki&startPg=0&Increment=50&submit=Search
854335	COc1cccc2[nH]c(cc12)C(=O)N[C@@H](CC(C)C)C(=O)N[C@@H](C[C@@H]1CCNC1=O)C(=O)CCl	HYLDYCNHHSWPDN-WBAXXEDZSA-N	WO2005113580-Ex-01	3C-like proteinase (3CL-PRO)	Human SARS coronavirus				10000		http://www.bindingdb.org/jsp/dbsearch/PrimarySearch_ki.jsp?energyterm=kJ/mole&tag=r21&monomerid=423408&enzyme=3C-like+proteinase+%283CL-PRO%29&column=ki&startPg=0&Increment=50&submit=Search	91020656
854336	COc1cccc2[nH]c(cc12)C(=O)N[C@@H](CC(C)C)C(=O)N[C@@H](C[C@@H]1CCNC1=O)C(=O)CO	QDIMHKWNHMVDJB-WBAXXEDZSA-N	PF-00835231::PF-0835231::WO2005113580-Ex-02	3C-like proteinase (3CL-PRO)	Human SARS coronavirus		4.00				http://www.bindingdb.org/jsp/dbsearch/PrimarySearch_ki.jsp?energyterm=kJ/mole&tag=r21&monomerid=420298&enzyme=3C-like+proteinase+%283CL-PRO%29&column=ki&startPg=0&Increment=50&submit=Search
854337	COc1cccc2[nH]c(cc12)C(=O)N[C@@H](CC(C)C)C(=O)N[C@@H](C[C@@H]1CCNC1=O)C(=O)CO	QDIMHKWNHMVDJB-WBAXXEDZSA-N	PF-00835231::PF-0835231::WO2005113580-Ex-02	3C-like proteinase (3CL-PRO)	Human SARS coronavirus				5100		http://www.bindingdb.org/jsp/dbsearch/PrimarySearch_ki.jsp?energyterm=kJ/mole&tag=r21&monomerid=420298&enzyme=3C-like+proteinase+%283CL-PRO%29&column=ki&startPg=0&Increment=50&submit=Search
854338	COCC(=O)[C@H](C[C@@H]1CCNC1=O)NC(=O)[C@H](CC(C)C)NC(=O)c1cc2c(OC)cccc2[nH]1	DDBOBUWAMRFUJW-SNRMKQJTSA-N	WO2005113580-Ex-03	3C-like proteinase (3CL-PRO)	Human SARS coronavirus		51				http://www.bindingdb.org/jsp/dbsearch/PrimarySearch_ki.jsp?energyterm=kJ/mole&tag=r21&monomerid=423410&enzyme=3C-like+proteinase+%283CL-PRO%29&column=ki&startPg=0&Increment=50&submit=Search	154702362
854339	COCC(=O)[C@H](C[C@@H]1CCNC1=O)NC(=O)[C@H](CC(C)C)NC(=O)c1cc2c(OC)cccc2[nH]1	DDBOBUWAMRFUJW-SNRMKQJTSA-N	WO2005113580-Ex-03	3C-like proteinase (3CL-PRO)	Human SARS coronavirus				31000		http://www.bindingdb.org/jsp/dbsearch/PrimarySearch_ki.jsp?energyterm=kJ/mole&tag=r21&monomerid=423410&enzyme=3C-like+proteinase+%283CL-PRO%29&column=ki&startPg=0&Increment=50&submit=Search	154702362
854340	CC(C)C[C@H](NC(=O)c1cc2ccccc2[nH]1)C(=O)N[C@@H](C[C@@H]1CCNC1=O)C(=O)CO	KGHYEZHKSVQRJH-SZMVWBNQSA-N	WO2005113580-Ex-05	3C-like proteinase (3CL-PRO)	Human SARS coronavirus		38				http://www.bindingdb.org/jsp/dbsearch/PrimarySearch_ki.jsp?energyterm=kJ/mole&tag=r21&monomerid=423411&enzyme=3C-like+proteinase+%283CL-PRO%29&column=ki&startPg=0&Increment=50&submit=Search	143139086
854341	CC(C)C[C@H](NC(=O)c1cc2ccccc2[nH]1)C(=O)N[C@@H](C[C@@H]1CCNC1=O)C(=O)CO	KGHYEZHKSVQRJH-SZMVWBNQSA-N	WO2005113580-Ex-05	3C-like proteinase (3CL-PRO)	Human SARS coronavirus				20000		http://www.bindingdb.org/jsp/dbsearch/PrimarySearch_ki.jsp?energyterm=kJ/mole&tag=r21&monomerid=423411&enzyme=3C-like+proteinase+%283CL-PRO%29&column=ki&startPg=0&Increment=50&submit=Search	143139086
854342	COCC(=O)[C@H](C[C@@H]1CCNC1=O)NC(=O)[C@H](CC(C)C)NC(=O)c1cc2ccccc2[nH]1	YVANQKRQLNQFTP-WDSOQIARSA-N	WO2005113580-Ex-06	3C-like proteinase (3CL-PRO)	Human SARS coronavirus		131				http://www.bindingdb.org/jsp/dbsearch/PrimarySearch_ki.jsp?energyterm=kJ/mole&tag=r21&monomerid=423412&enzyme=3C-like+proteinase+%283CL-PRO%29&column=ki&startPg=0&Increment=50&submit=Search	70330987
854343	COCC(=O)[C@H](C[C@@H]1CCNC1=O)NC(=O)[C@H](CC(C)C)NC(=O)c1cc2ccccc2[nH]1	YVANQKRQLNQFTP-WDSOQIARSA-N	WO2005113580-Ex-06	3C-like proteinase (3CL-PRO)	Human SARS coronavirus				45000		http://www.bindingdb.org/jsp/dbsearch/PrimarySearch_ki.jsp?energyterm=kJ/mole&tag=r21&monomerid=423412&enzyme=3C-like+proteinase+%283CL-PRO%29&column=ki&startPg=0&Increment=50&submit=Search	70330987
854344	CCCC[C@H](NC(=O)c1cc2c(OC)cccc2[nH]1)C(=O)N[C@@H](C[C@@H]1CCNC1=O)C(=O)CCl	HPAFHNQIPXJCFT-WBAXXEDZSA-N	WO2005113580-Ex-07	3C-like proteinase (3CL-PRO)	Human SARS coronavirus				>42000		http://www.bindingdb.org/jsp/dbsearch/PrimarySearch_ki.jsp?energyterm=kJ/mole&tag=r21&monomerid=423413&enzyme=3C-like+proteinase+%283CL-PRO%29&column=ki&startPg=0&Increment=50&submit=Search	154702363
854345	CCCC[C@H](NC(=O)c1cc2c(OC)cccc2[nH]1)C(=O)N[C@@H](C[C@@H]1CCNC1=O)C(=O)CO	VBDNWOQWUMJPAC-WBAXXEDZSA-N	WO2005113580-Ex-08	3C-like proteinase (3CL-PRO)	Human SARS coronavirus		20				http://www.bindingdb.org/jsp/dbsearch/PrimarySearch_ki.jsp?energyterm=kJ/mole&tag=r21&monomerid=423414&enzyme=3C-like+proteinase+%283CL-PRO%29&column=ki&startPg=0&Increment=50&submit=Search	154702364
854346	CCCC[C@H](NC(=O)c1cc2c(OC)cccc2[nH]1)C(=O)N[C@@H](C[C@@H]1CCNC1=O)C(=O)CO	VBDNWOQWUMJPAC-WBAXXEDZSA-N	WO2005113580-Ex-08	3C-like proteinase (3CL-PRO)	Human SARS coronavirus				10000		http://www.bindingdb.org/jsp/dbsearch/PrimarySearch_ki.jsp?energyterm=kJ/mole&tag=r21&monomerid=423414&enzyme=3C-like+proteinase+%283CL-PRO%29&column=ki&startPg=0&Increment=50&submit=Search	154702364
854347	COc1cccc2[nH]c(cc12)C(=O)N[C@@H](CCC(C)C)C(=O)N[C@@H](C[C@@H]1CCNC1=O)C(=O)CO	OXJCELJPLVKZGO-SNRMKQJTSA-N	WO2005113580-Ex-10	3C-like proteinase (3CL-PRO)	Human SARS coronavirus		34				http://www.bindingdb.org/jsp/dbsearch/PrimarySearch_ki.jsp?energyterm=kJ/mole&tag=r21&monomerid=423415&enzyme=3C-like+proteinase+%283CL-PRO%29&column=ki&startPg=0&Increment=50&submit=Search	91537800
854348	COc1cccc2[nH]c(cc12)C(=O)N[C@@H](CCC(C)C)C(=O)N[C@@H](C[C@@H]1CCNC1=O)C(=O)CO	OXJCELJPLVKZGO-SNRMKQJTSA-N	WO2005113580-Ex-10	3C-like proteinase (3CL-PRO)	Human SARS coronavirus				33000		http://www.bindingdb.org/jsp/dbsearch/PrimarySearch_ki.jsp?energyterm=kJ/mole&tag=r21&monomerid=423415&enzyme=3C-like+proteinase+%283CL-PRO%29&column=ki&startPg=0&Increment=50&submit=Search	91537800
854349	COCC(=O)[C@H](C[C@@H]1CCNC1=O)NC(=O)[C@H](CCC(C)C)NC(=O)c1cc2c(OC)cccc2[nH]1	WUHKRBCSALYANC-VDGAXYAQSA-N	WO2005113580-Ex-11	3C-like proteinase (3CL-PRO)	Human SARS coronavirus		36				http://www.bindingdb.org/jsp/dbsearch/PrimarySearch_ki.jsp?energyterm=kJ/mole&tag=r21&monomerid=423417&enzyme=3C-like+proteinase+%283CL-PRO%29&column=ki&startPg=0&Increment=50&submit=Search	91251224
854350	COCC(=O)[C@H](C[C@@H]1CCNC1=O)NC(=O)[C@H](CCC(C)C)NC(=O)c1cc2c(OC)cccc2[nH]1	WUHKRBCSALYANC-VDGAXYAQSA-N	WO2005113580-Ex-11	3C-like proteinase (3CL-PRO)	Human SARS coronavirus				50000		http://www.bindingdb.org/jsp/dbsearch/PrimarySearch_ki.jsp?energyterm=kJ/mole&tag=r21&monomerid=423417&enzyme=3C-like+proteinase+%283CL-PRO%29&column=ki&startPg=0&Increment=50&submit=Search	91251224
854351	COc1cccc2[nH]c(cc12)C(=O)N[C@@H](CC(C)(C)C)C(=O)N[C@@H](C[C@@H]1CCNC1=O)C(=O)CO	CEMUHRBVCDSEOL-FNHZYXHNSA-N	WO2005113580-Ex-13	3C-like proteinase (3CL-PRO)	Human SARS coronavirus		23				http://www.bindingdb.org/jsp/dbsearch/PrimarySearch_ki.jsp?energyterm=kJ/mole&tag=r21&monomerid=423418&enzyme=3C-like+proteinase+%283CL-PRO%29&column=ki&startPg=0&Increment=50&submit=Search	70331453
854352	COc1cccc2[nH]c(cc12)C(=O)N[C@@H](CC(C)(C)C)C(=O)N[C@@H](C[C@@H]1CCNC1=O)C(=O)CO	CEMUHRBVCDSEOL-FNHZYXHNSA-N	WO2005113580-Ex-13	3C-like proteinase (3CL-PRO)	Human SARS coronavirus				11000		http://www.bindingdb.org/jsp/dbsearch/PrimarySearch_ki.jsp?energyterm=kJ/mole&tag=r21&monomerid=423418&enzyme=3C-like+proteinase+%283CL-PRO%29&column=ki&startPg=0&Increment=50&submit=Search	70331453
854353	COCC(=O)[C@H](C[C@@H]1CCNC1=O)NC(=O)[C@H](CC(C)(C)C)NC(=O)c1cc2c(OC)cccc2[nH]1	PEWZDBOBEGIBSD-QSFXBCCZSA-N	WO2005113580-Ex-14	3C-like proteinase (3CL-PRO)	Human SARS coronavirus		54				http://www.bindingdb.org/jsp/dbsearch/PrimarySearch_ki.jsp?energyterm=kJ/mole&tag=r21&monomerid=423419&enzyme=3C-like+proteinase+%283CL-PRO%29&column=ki&startPg=0&Increment=50&submit=Search	70330988
854354	COCC(=O)[C@H](C[C@@H]1CCNC1=O)NC(=O)[C@H](CC(C)(C)C)NC(=O)c1cc2c(OC)cccc2[nH]1	PEWZDBOBEGIBSD-QSFXBCCZSA-N	WO2005113580-Ex-14	3C-like proteinase (3CL-PRO)	Human SARS coronavirus				32000		http://www.bindingdb.org/jsp/dbsearch/PrimarySearch_ki.jsp?energyterm=kJ/mole&tag=r21&monomerid=423419&enzyme=3C-like+proteinase+%283CL-PRO%29&column=ki&startPg=0&Increment=50&submit=Search	70330988
854355	CC(C)(C)C[C@H](NC(=O)c1cc2ccccc2[nH]1)C(=O)N[C@@H](C[C@@H]1CCNC1=O)C(=O)CO	ZWIJIAMEZDPIBS-IEZWGBDMSA-N	WO2005113580-Ex-16	3C-like proteinase (3CL-PRO)	Human SARS coronavirus		20				http://www.bindingdb.org/jsp/dbsearch/PrimarySearch_ki.jsp?energyterm=kJ/mole&tag=r21&monomerid=423420&enzyme=3C-like+proteinase+%283CL-PRO%29&column=ki&startPg=0&Increment=50&submit=Search	90737702
854356	CC(C)(C)C[C@H](NC(=O)c1cc2ccccc2[nH]1)C(=O)N[C@@H](C[C@@H]1CCNC1=O)C(=O)CO	ZWIJIAMEZDPIBS-IEZWGBDMSA-N	WO2005113580-Ex-16	3C-like proteinase (3CL-PRO)	Human SARS coronavirus				17000		http://www.bindingdb.org/jsp/dbsearch/PrimarySearch_ki.jsp?energyterm=kJ/mole&tag=r21&monomerid=423420&enzyme=3C-like+proteinase+%283CL-PRO%29&column=ki&startPg=0&Increment=50&submit=Search	90737702
854357	COCC(=O)[C@H](C[C@@H]1CCNC1=O)NC(=O)[C@H](CC(C)(C)C)NC(=O)c1cc2ccccc2[nH]1	IULLQBINVRGFGJ-QRFRQXIXSA-N	WO2005113580-Ex-17	3C-like proteinase (3CL-PRO)	Human SARS coronavirus		105				http://www.bindingdb.org/jsp/dbsearch/PrimarySearch_ki.jsp?energyterm=kJ/mole&tag=r21&monomerid=423421&enzyme=3C-like+proteinase+%283CL-PRO%29&column=ki&startPg=0&Increment=50&submit=Search	154702365
854358	COCC(=O)[C@H](C[C@@H]1CCNC1=O)NC(=O)[C@H](CC(C)(C)C)NC(=O)c1cc2ccccc2[nH]1	IULLQBINVRGFGJ-QRFRQXIXSA-N	WO2005113580-Ex-17	3C-like proteinase (3CL-PRO)	Human SARS coronavirus				46000		http://www.bindingdb.org/jsp/dbsearch/PrimarySearch_ki.jsp?energyterm=kJ/mole&tag=r21&monomerid=423421&enzyme=3C-like+proteinase+%283CL-PRO%29&column=ki&startPg=0&Increment=50&submit=Search	154702365
854359	CCOCC(=O)[C@H](C[C@@H]1CCNC1=O)NC(=O)[C@H](CC(C)(C)C)NC(=O)c1cc2ccccc2[nH]1	KSTGVGSBRODERS-CUWPLCDZSA-N	WO2005113580-Ex-18	3C-like proteinase (3CL-PRO)	Human SARS coronavirus		112				http://www.bindingdb.org/jsp/dbsearch/PrimarySearch_ki.jsp?energyterm=kJ/mole&tag=r21&monomerid=423422&enzyme=3C-like+proteinase+%283CL-PRO%29&column=ki&startPg=0&Increment=50&submit=Search	154702366
854360	CCOCC(=O)[C@H](C[C@@H]1CCNC1=O)NC(=O)[C@H](CC(C)(C)C)NC(=O)c1cc2ccccc2[nH]1	KSTGVGSBRODERS-CUWPLCDZSA-N	WO2005113580-Ex-18	3C-like proteinase (3CL-PRO)	Human SARS coronavirus				20000		http://www.bindingdb.org/jsp/dbsearch/PrimarySearch_ki.jsp?energyterm=kJ/mole&tag=r21&monomerid=423422&enzyme=3C-like+proteinase+%283CL-PRO%29&column=ki&startPg=0&Increment=50&submit=Search	154702366
854361	CC(C)(C)C[C@H](NC(=O)[C@H]1CCCO1)C(=O)N[C@@H](C[C@@H]1CCNC1=O)C(=O)CO	PFJSVGDZMGOTSD-RZLSGREXSA-N	WO2005113580-Ex-20	3C-like proteinase (3CL-PRO)	Human SARS coronavirus		91				http://www.bindingdb.org/jsp/dbsearch/PrimarySearch_ki.jsp?energyterm=kJ/mole&tag=r21&monomerid=423423&enzyme=3C-like+proteinase+%283CL-PRO%29&column=ki&startPg=0&Increment=50&submit=Search	70330664
854362	CC(C)(C)C[C@H](NC(=O)[C@H]1CCCO1)C(=O)N[C@@H](C[C@@H]1CCNC1=O)C(=O)CO	PFJSVGDZMGOTSD-RZLSGREXSA-N	WO2005113580-Ex-20	3C-like proteinase (3CL-PRO)	Human SARS coronavirus				20000		http://www.bindingdb.org/jsp/dbsearch/PrimarySearch_ki.jsp?energyterm=kJ/mole&tag=r21&monomerid=423423&enzyme=3C-like+proteinase+%283CL-PRO%29&column=ki&startPg=0&Increment=50&submit=Search	70330664
854363	COCC(=O)[C@H](C[C@@H]1CCNC1=O)NC(=O)[C@H](CC(C)(C)C)NC(=O)[C@H]1CCCO1	NSUYTSXGIVXGQN-QBYUYEEZSA-N	WO2005113580-Ex-21	3C-like proteinase (3CL-PRO)	Human SARS coronavirus		1080				http://www.bindingdb.org/jsp/dbsearch/PrimarySearch_ki.jsp?energyterm=kJ/mole&tag=r21&monomerid=423424&enzyme=3C-like+proteinase+%283CL-PRO%29&column=ki&startPg=0&Increment=50&submit=Search	70331172
854364	COCC(=O)[C@H](C[C@@H]1CCNC1=O)NC(=O)[C@H](CC(C)(C)C)NC(=O)[C@H]1CCCO1	NSUYTSXGIVXGQN-QBYUYEEZSA-N	WO2005113580-Ex-21	3C-like proteinase (3CL-PRO)	Human SARS coronavirus				>100000		http://www.bindingdb.org/jsp/dbsearch/PrimarySearch_ki.jsp?energyterm=kJ/mole&tag=r21&monomerid=423424&enzyme=3C-like+proteinase+%283CL-PRO%29&column=ki&startPg=0&Increment=50&submit=Search	70331172
854365	COc1cccc2[nH]c(cc12)C(=O)N[C@@H](Cc1ccccc1)C(=O)N[C@@H](C[C@@H]1CCNC1=O)C(=O)CCl	LEYZXSWGUGFYAI-YYWHXJBOSA-N	WO2005113580-Ex-22	3C-like proteinase (3CL-PRO)	Human SARS coronavirus				7500		http://www.bindingdb.org/jsp/dbsearch/PrimarySearch_ki.jsp?energyterm=kJ/mole&tag=r21&monomerid=423425&enzyme=3C-like+proteinase+%283CL-PRO%29&column=ki&startPg=0&Increment=50&submit=Search	154702367
854366	COc1cccc2[nH]c(cc12)C(=O)N[C@@H](Cc1ccccc1)C(=O)N[C@@H](C[C@@H]1CCNC1=O)C(=O)CO	FTJJLHJSQOEVCN-YYWHXJBOSA-N	WO2005113580-Ex-23	3C-like proteinase (3CL-PRO)	Human SARS coronavirus		103				http://www.bindingdb.org/jsp/dbsearch/PrimarySearch_ki.jsp?energyterm=kJ/mole&tag=r21&monomerid=423426&enzyme=3C-like+proteinase+%283CL-PRO%29&column=ki&startPg=0&Increment=50&submit=Search	70331170
854367	COc1cccc2[nH]c(cc12)C(=O)N[C@@H](Cc1ccccc1)C(=O)N[C@@H](C[C@@H]1CCNC1=O)C(=O)CO	FTJJLHJSQOEVCN-YYWHXJBOSA-N	WO2005113580-Ex-23	3C-like proteinase (3CL-PRO)	Human SARS coronavirus				47000		http://www.bindingdb.org/jsp/dbsearch/PrimarySearch_ki.jsp?energyterm=kJ/mole&tag=r21&monomerid=423426&enzyme=3C-like+proteinase+%283CL-PRO%29&column=ki&startPg=0&Increment=50&submit=Search	70331170
854368	CC(C)C[C@H](N(C)C(=O)c1cc2ccccc2[nH]1)C(=O)N[C@@H](C[C@@H]1CCNC1=O)C(=O)CO	SIIMTOCANPWKDE-QRFRQXIXSA-N	WO2005113580-Ex-25	3C-like proteinase (3CL-PRO)	Human SARS coronavirus		152				http://www.bindingdb.org/jsp/dbsearch/PrimarySearch_ki.jsp?energyterm=kJ/mole&tag=r21&monomerid=423427&enzyme=3C-like+proteinase+%283CL-PRO%29&column=ki&startPg=0&Increment=50&submit=Search	70331002
854369	CC(C)C[C@H](N(C)C(=O)c1cc2ccccc2[nH]1)C(=O)N[C@@H](C[C@@H]1CCNC1=O)C(=O)CO	SIIMTOCANPWKDE-QRFRQXIXSA-N	WO2005113580-Ex-25	3C-like proteinase (3CL-PRO)	Human SARS coronavirus				39000		http://www.bindingdb.org/jsp/dbsearch/PrimarySearch_ki.jsp?energyterm=kJ/mole&tag=r21&monomerid=423427&enzyme=3C-like+proteinase+%283CL-PRO%29&column=ki&startPg=0&Increment=50&submit=Search	70331002
854370	COc1cccc2[nH]c(cc12)C(=O)N[C@@H](CC1CCCCC1)C(=O)N[C@@H](C[C@@H]1CCNC1=O)C(=O)COCc1ccccc1	XXYBEOYTBGBIIC-WIRXVTQYSA-N	WO2005113580-Ex-26	3C-like proteinase (3CL-PRO)	Human SARS coronavirus		133				http://www.bindingdb.org/jsp/dbsearch/PrimarySearch_ki.jsp?energyterm=kJ/mole&tag=r21&monomerid=423428&enzyme=3C-like+proteinase+%283CL-PRO%29&column=ki&startPg=0&Increment=50&submit=Search	70331006
854371	COc1cccc2[nH]c(cc12)C(=O)N[C@@H](CC1CCCCC1)C(=O)N[C@@H](C[C@@H]1CCNC1=O)C(=O)COCc1ccccc1	XXYBEOYTBGBIIC-WIRXVTQYSA-N	WO2005113580-Ex-26	3C-like proteinase (3CL-PRO)	Human SARS coronavirus				5800		http://www.bindingdb.org/jsp/dbsearch/PrimarySearch_ki.jsp?energyterm=kJ/mole&tag=r21&monomerid=423428&enzyme=3C-like+proteinase+%283CL-PRO%29&column=ki&startPg=0&Increment=50&submit=Search	70331006
854372	COc1cccc2[nH]c(cc12)C(=O)N[C@@H](CC1CCCCC1)C(=O)N[C@@H](C[C@@H]1CCNC1=O)C(=O)CO	LZRKKUAWIAVFRJ-YYWHXJBOSA-N	WO2005113580-Ex-27	3C-like proteinase (3CL-PRO)	Human SARS coronavirus		25				http://www.bindingdb.org/jsp/dbsearch/PrimarySearch_ki.jsp?energyterm=kJ/mole&tag=r21&monomerid=423429&enzyme=3C-like+proteinase+%283CL-PRO%29&column=ki&startPg=0&Increment=50&submit=Search	90858302
854373	COc1cccc2[nH]c(cc12)C(=O)N[C@@H](CC1CCCCC1)C(=O)N[C@@H](C[C@@H]1CCNC1=O)C(=O)CO	LZRKKUAWIAVFRJ-YYWHXJBOSA-N	WO2005113580-Ex-27	3C-like proteinase (3CL-PRO)	Human SARS coronavirus				14000		http://www.bindingdb.org/jsp/dbsearch/PrimarySearch_ki.jsp?energyterm=kJ/mole&tag=r21&monomerid=423429&enzyme=3C-like+proteinase+%283CL-PRO%29&column=ki&startPg=0&Increment=50&submit=Search	90858302
854374	COc1cccc2[nH]c(cc12)C(=O)N(C)[C@@H](CC(C)C)C(=O)N[C@@H](C[C@@H]1CCNC1=O)C(=O)COCc1ccccc1	KPARVBIJDYMZRF-LNBJVWSJSA-N	WO2005113580-Ex-28	3C-like proteinase (3CL-PRO)	Human SARS coronavirus		927				http://www.bindingdb.org/jsp/dbsearch/PrimarySearch_ki.jsp?energyterm=kJ/mole&tag=r21&monomerid=423430&enzyme=3C-like+proteinase+%283CL-PRO%29&column=ki&startPg=0&Increment=50&submit=Search	69805420
854375	COc1cccc2[nH]c(cc12)C(=O)N(C)[C@@H](CC(C)C)C(=O)N[C@@H](C[C@@H]1CCNC1=O)C(=O)COCc1ccccc1	KPARVBIJDYMZRF-LNBJVWSJSA-N	WO2005113580-Ex-28	3C-like proteinase (3CL-PRO)	Human SARS coronavirus				16000		http://www.bindingdb.org/jsp/dbsearch/PrimarySearch_ki.jsp?energyterm=kJ/mole&tag=r21&monomerid=423430&enzyme=3C-like+proteinase+%283CL-PRO%29&column=ki&startPg=0&Increment=50&submit=Search	69805420
854376	COc1cccc2[nH]c(cc12)C(=O)N(C)[C@@H](CC(C)C)C(=O)N[C@@H](C[C@@H]1CCNC1=O)C(=O)CO	QZZQSANQZVXOQZ-QSFXBCCZSA-N	WO2005113580-Ex-29	3C-like proteinase (3CL-PRO)	Human SARS coronavirus		105				http://www.bindingdb.org/jsp/dbsearch/PrimarySearch_ki.jsp?energyterm=kJ/mole&tag=r21&monomerid=423431&enzyme=3C-like+proteinase+%283CL-PRO%29&column=ki&startPg=0&Increment=50&submit=Search	143139096
854377	COc1cccc2[nH]c(cc12)C(=O)N(C)[C@@H](CC(C)C)C(=O)N[C@@H](C[C@@H]1CCNC1=O)C(=O)CO	QZZQSANQZVXOQZ-QSFXBCCZSA-N	WO2005113580-Ex-29	3C-like proteinase (3CL-PRO)	Human SARS coronavirus				19000		http://www.bindingdb.org/jsp/dbsearch/PrimarySearch_ki.jsp?energyterm=kJ/mole&tag=r21&monomerid=423431&enzyme=3C-like+proteinase+%283CL-PRO%29&column=ki&startPg=0&Increment=50&submit=Search	143139096
854378	COc1cccc2[nH]c(cc12)C(=O)N[C@@H](CC(C)(C)C)C(=O)N[C@@H](C[C@@H]1CCNC1=O)C(=O)COCc1ccccc1	RDJBJGGQKYGFCU-CVJWPJSTSA-N	WO2005113580-Ex-30	3C-like proteinase (3CL-PRO)	Human SARS coronavirus		32				http://www.bindingdb.org/jsp/dbsearch/PrimarySearch_ki.jsp?energyterm=kJ/mole&tag=r21&monomerid=423432&enzyme=3C-like+proteinase+%283CL-PRO%29&column=ki&startPg=0&Increment=50&submit=Search	154702368
854379	COc1cccc2[nH]c(cc12)C(=O)N[C@@H](CC(C)(C)C)C(=O)N[C@@H](C[C@@H]1CCNC1=O)C(=O)COCc1ccccc1	RDJBJGGQKYGFCU-CVJWPJSTSA-N	WO2005113580-Ex-30	3C-like proteinase (3CL-PRO)	Human SARS coronavirus				4100		http://www.bindingdb.org/jsp/dbsearch/PrimarySearch_ki.jsp?energyterm=kJ/mole&tag=r21&monomerid=423432&enzyme=3C-like+proteinase+%283CL-PRO%29&column=ki&startPg=0&Increment=50&submit=Search	154702368
854380	COc1cccc2[nH]c(cc12)C(=O)N[C@@H](CC(C)C)C(=O)N[C@@H](CCC(=O)N(C)C)C(=O)CO	ZJDFRWXSTAEFOZ-ROUUACIJSA-N	WO2005113580-Ex-34	3C-like proteinase (3CL-PRO)	Human SARS coronavirus		190				http://www.bindingdb.org/jsp/dbsearch/PrimarySearch_ki.jsp?energyterm=kJ/mole&tag=r21&monomerid=423433&enzyme=3C-like+proteinase+%283CL-PRO%29&column=ki&startPg=0&Increment=50&submit=Search	70331219
854381	COc1cccc2[nH]c(cc12)C(=O)N[C@@H](CC(C)C)C(=O)N[C@@H](C[C@@H]1CCNC1=O)C(=O)COC(C)=O	NIPDSEFWCRXTSR-VDGAXYAQSA-N	WO2005113580-Ex-36	3C-like proteinase (3CL-PRO)	Human SARS coronavirus		220				http://www.bindingdb.org/jsp/dbsearch/PrimarySearch_ki.jsp?energyterm=kJ/mole&tag=r21&monomerid=423434&enzyme=3C-like+proteinase+%283CL-PRO%29&column=ki&startPg=0&Increment=50&submit=Search	91038393
854382	COc1cccc2[nH]c(cc12)C(=O)N[C@@H](CC(C)C)C(=O)N[C@@H](C[C@@H]1CCNC1=O)C(=O)COC(C)=O	NIPDSEFWCRXTSR-VDGAXYAQSA-N	WO2005113580-Ex-36	3C-like proteinase (3CL-PRO)	Human SARS coronavirus				6700		http://www.bindingdb.org/jsp/dbsearch/PrimarySearch_ki.jsp?energyterm=kJ/mole&tag=r21&monomerid=423434&enzyme=3C-like+proteinase+%283CL-PRO%29&column=ki&startPg=0&Increment=50&submit=Search	91038393
854383	COc1cccc2[nH]c(cc12)C(=O)N[C@@H](CC(C)C)C(=O)N[C@@H](C[C@@H]1CCNC1=O)C(=O)COC(=O)C1CC1	NJDKHIRBWKLHES-YYWHXJBOSA-N	WO2005113580-Ex-37	3C-like proteinase (3CL-PRO)	Human SARS coronavirus		180				http://www.bindingdb.org/jsp/dbsearch/PrimarySearch_ki.jsp?energyterm=kJ/mole&tag=r21&monomerid=423435&enzyme=3C-like+proteinase+%283CL-PRO%29&column=ki&startPg=0&Increment=50&submit=Search	143139062
854384	COc1cccc2[nH]c(cc12)C(=O)N[C@@H](CC(C)C)C(=O)N[C@@H](C[C@@H]1CCNC1=O)C(=O)COC(=O)C1CC1	NJDKHIRBWKLHES-YYWHXJBOSA-N	WO2005113580-Ex-37	3C-like proteinase (3CL-PRO)	Human SARS coronavirus				9300		http://www.bindingdb.org/jsp/dbsearch/PrimarySearch_ki.jsp?energyterm=kJ/mole&tag=r21&monomerid=423435&enzyme=3C-like+proteinase+%283CL-PRO%29&column=ki&startPg=0&Increment=50&submit=Search	143139062
854385	COc1cccc2[nH]c(cc12)C(=O)N[C@@H](CC(C)C)C(=O)N[C@@H](C[C@@H]1CCNC1=O)C(=O)COC(=O)C(C)(C)C	STJUYOUQLTVKIO-YYWHXJBOSA-N	WO2005113580-Ex-38	3C-like proteinase (3CL-PRO)	Human SARS coronavirus		230				http://www.bindingdb.org/jsp/dbsearch/PrimarySearch_ki.jsp?energyterm=kJ/mole&tag=r21&monomerid=423436&enzyme=3C-like+proteinase+%283CL-PRO%29&column=ki&startPg=0&Increment=50&submit=Search	154702369
854386	COc1cccc2[nH]c(cc12)C(=O)N[C@@H](CC(C)C)C(=O)N[C@@H](C[C@@H]1CCNC1=O)C(=O)COC(=O)C(C)(C)C	STJUYOUQLTVKIO-YYWHXJBOSA-N	WO2005113580-Ex-38	3C-like proteinase (3CL-PRO)	Human SARS coronavirus				5400		http://www.bindingdb.org/jsp/dbsearch/PrimarySearch_ki.jsp?energyterm=kJ/mole&tag=r21&monomerid=423436&enzyme=3C-like+proteinase+%283CL-PRO%29&column=ki&startPg=0&Increment=50&submit=Search	154702369
854387	CC(C)(C)C[C@H](NC(=O)[C@H]1CCCO1)C(=O)N[C@@H](C[C@@H]1CCNC1=O)C(=O)COC(=O)c1c(Cl)cccc1Cl	CQNWJNAANCPDSO-LDBRAYGESA-N	WO2005113580-Ex-39	3C-like proteinase (3CL-PRO)	Human SARS coronavirus		133				http://www.bindingdb.org/jsp/dbsearch/PrimarySearch_ki.jsp?energyterm=kJ/mole&tag=r21&monomerid=423437&enzyme=3C-like+proteinase+%283CL-PRO%29&column=ki&startPg=0&Increment=50&submit=Search	70331005
854388	CC(C)(C)C[C@H](NC(=O)[C@H]1CCCO1)C(=O)N[C@@H](C[C@@H]1CCNC1=O)C(=O)COC(=O)c1c(Cl)cccc1Cl	CQNWJNAANCPDSO-LDBRAYGESA-N	WO2005113580-Ex-39	3C-like proteinase (3CL-PRO)	Human SARS coronavirus				2300		http://www.bindingdb.org/jsp/dbsearch/PrimarySearch_ki.jsp?energyterm=kJ/mole&tag=r21&monomerid=423437&enzyme=3C-like+proteinase+%283CL-PRO%29&column=ki&startPg=0&Increment=50&submit=Search	70331005
854389	COc1cccc2[nH]c(cc12)C(=O)N[C@@H](CC(C)C)C(=O)N[C@@H](C[C@@H]1CCNC1=O)C(=O)COC(=O)c1ccccc1	VPIAXHFAMJPKLL-OYDLWJJNSA-N	WO2005113580-Ex-40	3C-like proteinase (3CL-PRO)	Human SARS coronavirus		86				http://www.bindingdb.org/jsp/dbsearch/PrimarySearch_ki.jsp?energyterm=kJ/mole&tag=r21&monomerid=423438&enzyme=3C-like+proteinase+%283CL-PRO%29&column=ki&startPg=0&Increment=50&submit=Search	154702370
854390	COc1cccc2[nH]c(cc12)C(=O)N[C@@H](CC(C)C)C(=O)N[C@@H](C[C@@H]1CCNC1=O)C(=O)COC(=O)c1ccccc1	VPIAXHFAMJPKLL-OYDLWJJNSA-N	WO2005113580-Ex-40	3C-like proteinase (3CL-PRO)	Human SARS coronavirus				5000		http://www.bindingdb.org/jsp/dbsearch/PrimarySearch_ki.jsp?energyterm=kJ/mole&tag=r21&monomerid=423438&enzyme=3C-like+proteinase+%283CL-PRO%29&column=ki&startPg=0&Increment=50&submit=Search	154702370
854391	COc1cccc2[nH]c(cc12)C(=O)N[C@@H](CC(C)C)C(=O)N[C@@H](C[C@@H]1CCNC1=O)C(=O)COC(=O)c1ccc(C)cc1	DEWVBRYUJIZIFD-TUSQITKMSA-N	WO2005113580-Ex-41	3C-like proteinase (3CL-PRO)	Human SARS coronavirus		82				http://www.bindingdb.org/jsp/dbsearch/PrimarySearch_ki.jsp?energyterm=kJ/mole&tag=r21&monomerid=423439&enzyme=3C-like+proteinase+%283CL-PRO%29&column=ki&startPg=0&Increment=50&submit=Search	143139035
854392	COc1cccc2[nH]c(cc12)C(=O)N[C@@H](CC(C)C)C(=O)N[C@@H](C[C@@H]1CCNC1=O)C(=O)COC(=O)c1ccc(C)cc1	DEWVBRYUJIZIFD-TUSQITKMSA-N	WO2005113580-Ex-41	3C-like proteinase (3CL-PRO)	Human SARS coronavirus				5900		http://www.bindingdb.org/jsp/dbsearch/PrimarySearch_ki.jsp?energyterm=kJ/mole&tag=r21&monomerid=423439&enzyme=3C-like+proteinase+%283CL-PRO%29&column=ki&startPg=0&Increment=50&submit=Search	143139035
854393	COc1cccc2[nH]c(cc12)C(=O)N[C@@H](CC(C)C)C(=O)N[C@@H](C[C@@H]1CCNC1=O)C(=O)COC(=O)c1ccc(F)cc1	UUKGLZPXHPVYPL-IGKWTDBASA-N	WO2005113580-Ex-42	3C-like proteinase (3CL-PRO)	Human SARS coronavirus		82				http://www.bindingdb.org/jsp/dbsearch/PrimarySearch_ki.jsp?energyterm=kJ/mole&tag=r21&monomerid=423440&enzyme=3C-like+proteinase+%283CL-PRO%29&column=ki&startPg=0&Increment=50&submit=Search	91080811
854394	COc1cccc2[nH]c(cc12)C(=O)N[C@@H](CC(C)C)C(=O)N[C@@H](C[C@@H]1CCNC1=O)C(=O)COC(=O)c1ccc(F)cc1	UUKGLZPXHPVYPL-IGKWTDBASA-N	WO2005113580-Ex-42	3C-like proteinase (3CL-PRO)	Human SARS coronavirus				5900		http://www.bindingdb.org/jsp/dbsearch/PrimarySearch_ki.jsp?energyterm=kJ/mole&tag=r21&monomerid=423440&enzyme=3C-like+proteinase+%283CL-PRO%29&column=ki&startPg=0&Increment=50&submit=Search	91080811
854395	COc1cccc2[nH]c(cc12)C(=O)N[C@@H](CC(C)C)C(=O)N[C@@H](C[C@@H]1CCNC1=O)C(=O)COC(=O)c1ccc(cc1)C#N	ARFWPFMCFOCFND-TUSQITKMSA-N	WO2005113580-Ex-43	3C-like proteinase (3CL-PRO)	Human SARS coronavirus		53				http://www.bindingdb.org/jsp/dbsearch/PrimarySearch_ki.jsp?energyterm=kJ/mole&tag=r21&monomerid=423441&enzyme=3C-like+proteinase+%283CL-PRO%29&column=ki&startPg=0&Increment=50&submit=Search	143139071
854396	COc1cccc2[nH]c(cc12)C(=O)N[C@@H](CC(C)C)C(=O)N[C@@H](C[C@@H]1CCNC1=O)C(=O)COC(=O)c1ccc(cc1)C#N	ARFWPFMCFOCFND-TUSQITKMSA-N	WO2005113580-Ex-43	3C-like proteinase (3CL-PRO)	Human SARS coronavirus				5900		http://www.bindingdb.org/jsp/dbsearch/PrimarySearch_ki.jsp?energyterm=kJ/mole&tag=r21&monomerid=423441&enzyme=3C-like+proteinase+%283CL-PRO%29&column=ki&startPg=0&Increment=50&submit=Search	143139071
854397	COc1ccc(cc1)C(=O)OCC(=O)[C@H](C[C@@H]1CCNC1=O)NC(=O)[C@H](CC(C)C)NC(=O)c1cc2c(OC)cccc2[nH]1	OULBVRJYPFROGZ-OPXMRZJTSA-N	WO2005113580-Ex-44	3C-like proteinase (3CL-PRO)	Human SARS coronavirus		79				http://www.bindingdb.org/jsp/dbsearch/PrimarySearch_ki.jsp?energyterm=kJ/mole&tag=r21&monomerid=423442&enzyme=3C-like+proteinase+%283CL-PRO%29&column=ki&startPg=0&Increment=50&submit=Search	143139052
854398	COc1ccc(cc1)C(=O)OCC(=O)[C@H](C[C@@H]1CCNC1=O)NC(=O)[C@H](CC(C)C)NC(=O)c1cc2c(OC)cccc2[nH]1	OULBVRJYPFROGZ-OPXMRZJTSA-N	WO2005113580-Ex-44	3C-like proteinase (3CL-PRO)	Human SARS coronavirus				5300		http://www.bindingdb.org/jsp/dbsearch/PrimarySearch_ki.jsp?energyterm=kJ/mole&tag=r21&monomerid=423442&enzyme=3C-like+proteinase+%283CL-PRO%29&column=ki&startPg=0&Increment=50&submit=Search	143139052
854399	COc1cccc2[nH]c(cc12)C(=O)N[C@@H](CC(C)C)C(=O)N[C@@H](C[C@@H]1CCNC1=O)C(=O)COC(=O)c1ccc(Cl)cc1	MFZKGSFMTGFGIG-IGKWTDBASA-N	WO2005113580-Ex-45	3C-like proteinase (3CL-PRO)	Human SARS coronavirus				5300		http://www.bindingdb.org/jsp/dbsearch/PrimarySearch_ki.jsp?energyterm=kJ/mole&tag=r21&monomerid=423443&enzyme=3C-like+proteinase+%283CL-PRO%29&column=ki&startPg=0&Increment=50&submit=Search	143139108
854400	COc1cccc2[nH]c(cc12)C(=O)N[C@@H](CC(C)C)C(=O)N[C@@H](C[C@@H]1CCNC1=O)C(=O)COC(=O)c1c(Cl)cccc1Cl	MIZNJBIKRFSPSN-RTFZILSDSA-N	WO2005113580-Ex-46	3C-like proteinase (3CL-PRO)	Human SARS coronavirus				350		http://www.bindingdb.org/jsp/dbsearch/PrimarySearch_ki.jsp?energyterm=kJ/mole&tag=r21&monomerid=423444&enzyme=3C-like+proteinase+%283CL-PRO%29&column=ki&startPg=0&Increment=50&submit=Search	154702371
854401	COc1cccc2[nH]c(cc12)C(=O)N[C@@H](CC(C)C)C(=O)N[C@@H](C[C@@H]1CCNC1=O)C(=O)COC(=O)c1c(C)cccc1C	AZLMGXZYIYHCQZ-TUSQITKMSA-N	WO2005113580-Ex-47	3C-like proteinase (3CL-PRO)	Human SARS coronavirus		160				http://www.bindingdb.org/jsp/dbsearch/PrimarySearch_ki.jsp?energyterm=kJ/mole&tag=r21&monomerid=423445&enzyme=3C-like+proteinase+%283CL-PRO%29&column=ki&startPg=0&Increment=50&submit=Search	154702372
854402	COc1cccc2[nH]c(cc12)C(=O)N[C@@H](CC(C)C)C(=O)N[C@@H](C[C@@H]1CCNC1=O)C(=O)COC(=O)c1c(F)cccc1F	KXVJSKRKKHMCTM-RTFZILSDSA-N	WO2005113580-Ex-48	3C-like proteinase (3CL-PRO)	Human SARS coronavirus				14000		http://www.bindingdb.org/jsp/dbsearch/PrimarySearch_ki.jsp?energyterm=kJ/mole&tag=r21&monomerid=423446&enzyme=3C-like+proteinase+%283CL-PRO%29&column=ki&startPg=0&Increment=50&submit=Search	91135551
854403	COc1cccc(OC)c1C(=O)OCC(=O)[C@H](C[C@@H]1CCNC1=O)NC(=O)[C@H](CC(C)C)NC(=O)c1cc2c(OC)cccc2[nH]1	LYBPTTFNSHIUQU-VJBMBRPKSA-N	WO2005113580-Ex-49	3C-like proteinase (3CL-PRO)	Human SARS coronavirus		210				http://www.bindingdb.org/jsp/dbsearch/PrimarySearch_ki.jsp?energyterm=kJ/mole&tag=r21&monomerid=423447&enzyme=3C-like+proteinase+%283CL-PRO%29&column=ki&startPg=0&Increment=50&submit=Search	154702373
854404	COc1cccc2[nH]c(cc12)C(=O)N[C@@H](CC(C)C)C(=O)N[C@@H](C[C@@H]1CCNC1=O)C(=O)COC(=O)c1ccc(Cl)cc1O	BOBJXEAARXPNCP-RTFZILSDSA-N	WO2005113580-Ex-50	3C-like proteinase (3CL-PRO)	Human SARS coronavirus				32000		http://www.bindingdb.org/jsp/dbsearch/PrimarySearch_ki.jsp?energyterm=kJ/mole&tag=r21&monomerid=423448&enzyme=3C-like+proteinase+%283CL-PRO%29&column=ki&startPg=0&Increment=50&submit=Search	154702374
854405	COc1cccc2[nH]c(cc12)C(=O)N[C@@H](CC(C)C)C(=O)N[C@@H](C[C@@H]1CCNC1=O)C(=O)COC(=O)c1ccc(cc1F)C#N	NGRIRFOJONEEGE-LQGLAIQGSA-N	WO2005113580-Ex-51	3C-like proteinase (3CL-PRO)	Human SARS coronavirus				30000		http://www.bindingdb.org/jsp/dbsearch/PrimarySearch_ki.jsp?energyterm=kJ/mole&tag=r21&monomerid=423449&enzyme=3C-like+proteinase+%283CL-PRO%29&column=ki&startPg=0&Increment=50&submit=Search	154702375
854406	COc1cccc2[nH]c(cc12)C(=O)N[C@@H](CC(C)C)C(=O)N[C@@H](C[C@@H]1CCNC1=O)C(=O)CNC(=O)c1ccccc1C#N	HGKFLGSHQSQPHE-LQGLAIQGSA-N	WO2005113580-Ex-52	3C-like proteinase (3CL-PRO)	Human SARS coronavirus		17				http://www.bindingdb.org/jsp/dbsearch/PrimarySearch_ki.jsp?energyterm=kJ/mole&tag=r21&monomerid=423450&enzyme=3C-like+proteinase+%283CL-PRO%29&column=ki&startPg=0&Increment=50&submit=Search	91020540
854407	COc1cccc2[nH]c(cc12)C(=O)N[C@@H](CC(C)C)C(=O)N[C@@H](C[C@@H]1CCNC1=O)C(=O)CNC(=O)c1ccccc1C#N	HGKFLGSHQSQPHE-LQGLAIQGSA-N	WO2005113580-Ex-52	3C-like proteinase (3CL-PRO)	Human SARS coronavirus				10000		http://www.bindingdb.org/jsp/dbsearch/PrimarySearch_ki.jsp?energyterm=kJ/mole&tag=r21&monomerid=423450&enzyme=3C-like+proteinase+%283CL-PRO%29&column=ki&startPg=0&Increment=50&submit=Search	91020540
854408	CC(C)C[C@H](NC(C)=O)C(=O)N[C@@H](C[C@@H]1CCNC1=O)C(=O)COC(=O)c1c(Cl)cccc1Cl	SXXAXVNCBPVURL-WBAXXEDZSA-N	WO2005113580-Ex-53	3C-like proteinase (3CL-PRO)	Human SARS coronavirus		1280				http://www.bindingdb.org/jsp/dbsearch/PrimarySearch_ki.jsp?energyterm=kJ/mole&tag=r21&monomerid=423451&enzyme=3C-like+proteinase+%283CL-PRO%29&column=ki&startPg=0&Increment=50&submit=Search	154702376
854409	CC(C)C[C@H](NC(C)=O)C(=O)N[C@@H](C[C@@H]1CCNC1=O)C(=O)COC(=O)c1c(Cl)cccc1Cl	SXXAXVNCBPVURL-WBAXXEDZSA-N	WO2005113580-Ex-53	3C-like proteinase (3CL-PRO)	Human SARS coronavirus				7000		http://www.bindingdb.org/jsp/dbsearch/PrimarySearch_ki.jsp?energyterm=kJ/mole&tag=r21&monomerid=423451&enzyme=3C-like+proteinase+%283CL-PRO%29&column=ki&startPg=0&Increment=50&submit=Search	154702376
854410	CC(C)C[C@H](NC(=O)c1nc2ccccc2[nH]1)C(=O)N[C@@H](C[C@@H]1CCNC1=O)C(=O)COC(=O)c1c(Cl)cccc1Cl	PATCUNJSUBVCTH-SSKFGXFMSA-N	WO2005113580-Ex-54	3C-like proteinase (3CL-PRO)	Human SARS coronavirus				10000		http://www.bindingdb.org/jsp/dbsearch/PrimarySearch_ki.jsp?energyterm=kJ/mole&tag=r21&monomerid=423452&enzyme=3C-like+proteinase+%283CL-PRO%29&column=ki&startPg=0&Increment=50&submit=Search	154702377
854411	COc1cccc2[nH]c(cc12)C(=O)N[C@@H](CC(C)C)C(=O)N[C@@H](C[C@@H]1CCNC1=O)C(=O)CN=[N+]=[N-]	GPNHVDAGFNFUEZ-WBAXXEDZSA-N	WO2005113580-Ex-55	3C-like proteinase (3CL-PRO)	Human SARS coronavirus		101				http://www.bindingdb.org/jsp/dbsearch/PrimarySearch_ki.jsp?energyterm=kJ/mole&tag=r21&monomerid=423453&enzyme=3C-like+proteinase+%283CL-PRO%29&column=ki&startPg=0&Increment=50&submit=Search	154702378
854412	COc1cccc2[nH]c(cc12)C(=O)N[C@@H](CC(C)C)C(=O)N[C@@H](C[C@@H]1CCNC1=O)C(=O)CN=[N+]=[N-]	GPNHVDAGFNFUEZ-WBAXXEDZSA-N	WO2005113580-Ex-55	3C-like proteinase (3CL-PRO)	Human SARS coronavirus				94000		http://www.bindingdb.org/jsp/dbsearch/PrimarySearch_ki.jsp?energyterm=kJ/mole&tag=r21&monomerid=423453&enzyme=3C-like+proteinase+%283CL-PRO%29&column=ki&startPg=0&Increment=50&submit=Search	154702378
854413	COc1cccc2[nH]c(cc12)C(=O)N[C@@H](CC(C)C)C(=O)N[C@@H](C[C@@H]1CCNC1=O)C(=O)CNC(C)=O	YDNCMHMNEYXCAW-VDGAXYAQSA-N	WO2005113580-Ex-56	3C-like proteinase (3CL-PRO)	Human SARS coronavirus		2650				http://www.bindingdb.org/jsp/dbsearch/PrimarySearch_ki.jsp?energyterm=kJ/mole&tag=r21&monomerid=423454&enzyme=3C-like+proteinase+%283CL-PRO%29&column=ki&startPg=0&Increment=50&submit=Search	154702379
854414	COc1cccc2[nH]c(cc12)C(=O)N[C@@H](CC(C)C)C(=O)N[C@@H](C[C@@H]1CCNC1=O)C(=O)CNC(C)=O	YDNCMHMNEYXCAW-VDGAXYAQSA-N	WO2005113580-Ex-56	3C-like proteinase (3CL-PRO)	Human SARS coronavirus				>100000		http://www.bindingdb.org/jsp/dbsearch/PrimarySearch_ki.jsp?energyterm=kJ/mole&tag=r21&monomerid=423454&enzyme=3C-like+proteinase+%283CL-PRO%29&column=ki&startPg=0&Increment=50&submit=Search	154702379
854415	COc1cccc2[nH]c(cc12)C(=O)N[C@@H](CC(C)C)C(=O)N[C@@H](C[C@@H]1CCNC1=O)C(=O)CNS(C)(=O)=O	JNCIMKPBDRMPJR-SNRMKQJTSA-N	WO2005113580-Ex-57	3C-like proteinase (3CL-PRO)	Human SARS coronavirus		107				http://www.bindingdb.org/jsp/dbsearch/PrimarySearch_ki.jsp?energyterm=kJ/mole&tag=r21&monomerid=423455&enzyme=3C-like+proteinase+%283CL-PRO%29&column=ki&startPg=0&Increment=50&submit=Search	91158766
854416	COc1cccc2[nH]c(cc12)C(=O)N[C@@H](CC(C)C)C(=O)N[C@@H](C[C@@H]1CCNC1=O)C(=O)CNS(C)(=O)=O	JNCIMKPBDRMPJR-SNRMKQJTSA-N	WO2005113580-Ex-57	3C-like proteinase (3CL-PRO)	Human SARS coronavirus				20000		http://www.bindingdb.org/jsp/dbsearch/PrimarySearch_ki.jsp?energyterm=kJ/mole&tag=r21&monomerid=423455&enzyme=3C-like+proteinase+%283CL-PRO%29&column=ki&startPg=0&Increment=50&submit=Search	91158766
854417	COc1cccc2[nH]c(cc12)C(=O)N[C@@H](CC(C)C)C(=O)N[C@@H](C[C@@H]1CCNC1=O)C(=O)COC(=O)c1ccccc1C#N	QDDDUZBEUKGROG-LQGLAIQGSA-N	WO2005113580-Ex-58	3C-like proteinase (3CL-PRO)	Human SARS coronavirus				>100000		http://www.bindingdb.org/jsp/dbsearch/PrimarySearch_ki.jsp?energyterm=kJ/mole&tag=r21&monomerid=423457&enzyme=3C-like+proteinase+%283CL-PRO%29&column=ki&startPg=0&Increment=50&submit=Search	146681158
854418	COc1cccc2[nH]c(cc12)C(=O)N[C@@H](CC(C)C)C(=O)N[C@@H](C[C@@H]1CCNC1=O)C(=O)CN(C)C	NFBGGGPNURZHKG-VDGAXYAQSA-N	WO2005113580-Ex-61	3C-like proteinase (3CL-PRO)	Human SARS coronavirus				>100000		http://www.bindingdb.org/jsp/dbsearch/PrimarySearch_ki.jsp?energyterm=kJ/mole&tag=r21&monomerid=423458&enzyme=3C-like+proteinase+%283CL-PRO%29&column=ki&startPg=0&Increment=50&submit=Search	143139043
854419	CC(C)C[C@H](NC(=O)OC(C)(C)C)C(=O)N[C@H](CO)C[C@@H]1CCNC1=O	GSBKVKSQMQMPOW-IHRRRGAJSA-N	WO2006061714, Example 1::WO2006061714-ID-01	3C-like proteinase (3CL-PRO)	Human SARS coronavirus				>100000		http://www.bindingdb.org/jsp/dbsearch/PrimarySearch_ki.jsp?energyterm=kJ/mole&tag=r21&monomerid=423459&enzyme=3C-like+proteinase+%283CL-PRO%29&column=ki&startPg=0&Increment=50&submit=Search	11574279
854420	COc1cccc2[nH]c(cc12)C(=O)N[C@@H](CC(C)C)C(=O)N[C@H](CO)C[C@@H]1CCNC1=O	WHTWOUANZWYZGR-MPGHIAIKSA-N	WO2006061714, Example 2::WO2006061714-ID-02	3C-like proteinase (3CL-PRO)	Human SARS coronavirus				>100000		http://www.bindingdb.org/jsp/dbsearch/PrimarySearch_ki.jsp?energyterm=kJ/mole&tag=r21&monomerid=423460&enzyme=3C-like+proteinase+%283CL-PRO%29&column=ki&startPg=0&Increment=50&submit=Search	91023588
854421	COC(O)[C@@H](C[C@@H]1CCNC1=O)NC(=O)[C@H](CC(C)C)NC(=O)c1cc2c(OC)cccc2[nH]1	GYPAMRSUOHRGGS-BCKKPBOXSA-N	WO2006061714-ID-03	3C-like proteinase (3CL-PRO)	Human SARS coronavirus				800		http://www.bindingdb.org/jsp/dbsearch/PrimarySearch_ki.jsp?energyterm=kJ/mole&tag=r21&monomerid=423461&enzyme=3C-like+proteinase+%283CL-PRO%29&column=ki&startPg=0&Increment=50&submit=Search	154702381
854422	COc1cccc2[nH]c(cc12)C(=O)N[C@@H](CC(C)C)C(=O)N[C@@H](C[C@@H]1CCNC1=O)C=O	QCRLRBSKQJIUTG-MPGHIAIKSA-N	WO2006061714, P38.2::WO2006061714-ID-04	3C-like proteinase (3CL-PRO)	Human SARS coronavirus				1400		http://www.bindingdb.org/jsp/dbsearch/PrimarySearch_ki.jsp?energyterm=kJ/mole&tag=r21&monomerid=423462&enzyme=3C-like+proteinase+%283CL-PRO%29&column=ki&startPg=0&Increment=50&submit=Search	90936717
854423	COc1cccc2[nH]c(cc12)C(=O)N[C@@H](CC(C)C)C(=O)NC(C[C@@H]1CCNC1=O)C(C)=O	QKZJNDBFJRGTAA-GZMMRYBBSA-N	WO2006061714-ID-07	3C-like proteinase (3CL-PRO)	Human SARS coronavirus		2300				http://www.bindingdb.org/jsp/dbsearch/PrimarySearch_ki.jsp?energyterm=kJ/mole&tag=r21&monomerid=423463&enzyme=3C-like+proteinase+%283CL-PRO%29&column=ki&startPg=0&Increment=50&submit=Search	69652072
854424	COc1cccc2[nH]c(cc12)C(=O)N[C@@H](CC(C)C)C(=O)NC(C[C@@H]1CCNC1=O)C(C)=O	QKZJNDBFJRGTAA-GZMMRYBBSA-N	WO2006061714-ID-07	3C-like proteinase (3CL-PRO)	Human SARS coronavirus				91500		http://www.bindingdb.org/jsp/dbsearch/PrimarySearch_ki.jsp?energyterm=kJ/mole&tag=r21&monomerid=423463&enzyme=3C-like+proteinase+%283CL-PRO%29&column=ki&startPg=0&Increment=50&submit=Search	69652072
854425	CC(C)C[C@H](NC(=O)c1nc2ccccc2[nH]1)C(=O)N[C@@H](C[C@@H]1CCNC1=O)C=O	CQAHVFTUINWYCR-ZQIUZPCESA-N	WO2006061714, P38.7::WO2006061714-ID-09	3C-like proteinase (3CL-PRO)	Human SARS coronavirus		32				http://www.bindingdb.org/jsp/dbsearch/PrimarySearch_ki.jsp?energyterm=kJ/mole&tag=r21&monomerid=423464&enzyme=3C-like+proteinase+%283CL-PRO%29&column=ki&startPg=0&Increment=50&submit=Search	11553393
854426	CC(C)C[C@H](NC(=O)c1nc2ccccc2[nH]1)C(=O)N[C@@H](C[C@@H]1CCNC1=O)C=O	CQAHVFTUINWYCR-ZQIUZPCESA-N	WO2006061714, P38.7::WO2006061714-ID-09	3C-like proteinase (3CL-PRO)	Human SARS coronavirus				3600		http://www.bindingdb.org/jsp/dbsearch/PrimarySearch_ki.jsp?energyterm=kJ/mole&tag=r21&monomerid=423464&enzyme=3C-like+proteinase+%283CL-PRO%29&column=ki&startPg=0&Increment=50&submit=Search	11553393
854427	CC(C)C[C@H](NC(=O)c1cc2ccccc2[nH]1)C(=O)N[C@@H](C[C@@H]1CCNC1=O)C=O	HXJZYYCILNIXEI-BQFCYCMXSA-N	WO2006061714, P38.8::WO2006061714-ID-10	3C-like proteinase (3CL-PRO)	Human SARS coronavirus		20				http://www.bindingdb.org/jsp/dbsearch/PrimarySearch_ki.jsp?energyterm=kJ/mole&tag=r21&monomerid=423465&enzyme=3C-like+proteinase+%283CL-PRO%29&column=ki&startPg=0&Increment=50&submit=Search	143239739
854428	CC(C)C[C@H](NC(=O)c1cc2ccccc2[nH]1)C(=O)N[C@@H](C[C@@H]1CCNC1=O)C=O	HXJZYYCILNIXEI-BQFCYCMXSA-N	WO2006061714, P38.8::WO2006061714-ID-10	3C-like proteinase (3CL-PRO)	Human SARS coronavirus				4200		http://www.bindingdb.org/jsp/dbsearch/PrimarySearch_ki.jsp?energyterm=kJ/mole&tag=r21&monomerid=423465&enzyme=3C-like+proteinase+%283CL-PRO%29&column=ki&startPg=0&Increment=50&submit=Search	143239739
854429	CC(C)C[C@H](NC(=O)[C@@H](NC(=O)OCc1ccccc1)C(C)C)C(=O)N[C@@H](C[C@@H]1CCNC1=O)C=O	RUHYGYHBVKWREW-CMOCDZPBSA-N	WO2006061714, P39.1::WO2006061714-ID-11	3C-like proteinase (3CL-PRO)	Human SARS coronavirus		60				http://www.bindingdb.org/jsp/dbsearch/PrimarySearch_ki.jsp?energyterm=kJ/mole&tag=r21&monomerid=423466&enzyme=3C-like+proteinase+%283CL-PRO%29&column=ki&startPg=0&Increment=50&submit=Search	154699455
854430	CC(C)C[C@H](NC(=O)[C@@H](NC(=O)OCc1ccccc1)C(C)C)C(=O)N[C@@H](C[C@@H]1CCNC1=O)C=O	RUHYGYHBVKWREW-CMOCDZPBSA-N	WO2006061714, P39.1::WO2006061714-ID-11	3C-like proteinase (3CL-PRO)	Human SARS coronavirus				25000		http://www.bindingdb.org/jsp/dbsearch/PrimarySearch_ki.jsp?energyterm=kJ/mole&tag=r21&monomerid=423466&enzyme=3C-like+proteinase+%283CL-PRO%29&column=ki&startPg=0&Increment=50&submit=Search	154699455
854431	CC(C)C[C@H](NC(=O)[C@@H](NC(=O)OCc1ccccc1)C(C)C)C(=O)N[C@H](CO)C[C@@H]1CCNC1=O	GLZAWCKOCLSXEU-CMOCDZPBSA-N	WO2006061714, P39.2::WO2006061714-ID-12	3C-like proteinase (3CL-PRO)	Human SARS coronavirus		68000				http://www.bindingdb.org/jsp/dbsearch/PrimarySearch_ki.jsp?energyterm=kJ/mole&tag=r21&monomerid=423467&enzyme=3C-like+proteinase+%283CL-PRO%29&column=ki&startPg=0&Increment=50&submit=Search	154702382
854432	CC(C)C[C@H](NC(=O)[C@@H](NC(C)=O)C(C)C)C(=O)N[C@H](CO)C[C@@H]1CCNC1=O	SAJPBSLYYTVXRY-QAETUUGQSA-N	WO2006061714, P39.3::WO2006061714-ID-13	3C-like proteinase (3CL-PRO)	Human SARS coronavirus		97000				http://www.bindingdb.org/jsp/dbsearch/PrimarySearch_ki.jsp?energyterm=kJ/mole&tag=r21&monomerid=423468&enzyme=3C-like+proteinase+%283CL-PRO%29&column=ki&startPg=0&Increment=50&submit=Search	154702383
854433	COc1cccc2[nH]c(cc12)C(=O)N[C@@H](CC(C)C)C(=O)N[C@@H](CCC(=O)N(C)C)C=O	SEEIOOYGXIFSRU-YJBOKZPZSA-N	WO2006061714, P39.4::WO2006061714-ID-14	3C-like proteinase (3CL-PRO)	Human SARS coronavirus		50				http://www.bindingdb.org/jsp/dbsearch/PrimarySearch_ki.jsp?energyterm=kJ/mole&tag=r21&monomerid=423469&enzyme=3C-like+proteinase+%283CL-PRO%29&column=ki&startPg=0&Increment=50&submit=Search	91001503
854434	COc1cccc2[nH]c(cc12)C(=O)N[C@@H](CC(C)C)C(=O)N[C@@H](CCC(=O)N(C)C)C=O	SEEIOOYGXIFSRU-YJBOKZPZSA-N	WO2006061714, P39.4::WO2006061714-ID-14	3C-like proteinase (3CL-PRO)	Human SARS coronavirus				18000		http://www.bindingdb.org/jsp/dbsearch/PrimarySearch_ki.jsp?energyterm=kJ/mole&tag=r21&monomerid=423469&enzyme=3C-like+proteinase+%283CL-PRO%29&column=ki&startPg=0&Increment=50&submit=Search	91001503
854435	CON(C)C(=O)[C@H](CCC(=O)N(C)C)NC(=O)[C@H](CC(C)C)NC(=O)c1cc2c(OC)cccc2[nH]1	SZYQVFFWGNDCED-OALUTQOASA-N	WO2006061714, P39.5::WO2006061714-ID-15	3C-like proteinase (3CL-PRO)	Human SARS coronavirus		>100000				http://www.bindingdb.org/jsp/dbsearch/PrimarySearch_ki.jsp?energyterm=kJ/mole&tag=r21&monomerid=423470&enzyme=3C-like+proteinase+%283CL-PRO%29&column=ki&startPg=0&Increment=50&submit=Search	154702384
868529	CCOC(=O)\C=C\[C@H](Cc1ccccc1)NC(=O)[C@H](Cc1ccc(F)cc1)NC(=O)[C@@H](NC(=O)c1cc(C)on1)C(C)C	MRDHFZJRJNYFNI-WADMKTPGSA-N	AG7088 analogue 4a::ethyl (2E,4S)-4-[(2S)-3-(4-fluorophenyl)-2-[(2S)-3-methyl-2-[(5-methyl-1,2-oxazol-3-yl)formamido]butanamido]propanamido]-5-phenylpent-2-enoate::jm5b01461, Compound 4	3C-like proteinase (3CL-PRO)	Human SARS coronavirus		39000			10.1021/acs.jmedchem.5b01461	http://www.bindingdb.org/jsp/dbsearch/PrimarySearch_ki.jsp?energyterm=kJ/mole&tag=r21&monomerid=11255&enzyme=3C-like+proteinase+%283CL-PRO%29&column=ki&startPg=0&Increment=50&submit=Search	15959298			ZINC14947912
868530	CCOC(=O)\C=C\[C@H](Cc1ccccc1)NC(=O)[C@@H](CC(=O)[C@@H](NC(=O)c1cc(C)on1)C(C)C)Cc1ccccc1	ZNJXQWIARYSQOT-INZYYWFGSA-N	AG7088 analogue 3c::ethyl (2E,4S)-4-[(2R,5S)-2-benzyl-6-methyl-5-[(5-methyl-1,2-oxazol-3-yl)formamido]-4-oxoheptanamido]-5-phenylpent-2-enoate::jm5b01461, Compound 5	3C-like proteinase (3CL-PRO)	Human SARS coronavirus		13000			10.1021/acs.jmedchem.5b01461	http://www.bindingdb.org/jsp/dbsearch/PrimarySearch_ki.jsp?energyterm=kJ/mole&tag=r21&monomerid=11253&enzyme=3C-like+proteinase+%283CL-PRO%29&column=ki&startPg=0&Increment=50&submit=Search	15959296			ZINC14947906
868531	CCOC(=O)\C=C\[C@H](Cc1ccccc1)NC(=O)[C@H](Cc1ccccc1)NC(=O)\C=C\c1ccc(cc1)-c1ccccc1	PQFVYUJGFLSMKA-PFKUUMJMSA-N	dipeptidomimetic unsaturated ester 18a::ethyl (2E,4S)-4-({N-[(2E)-3-(1,1-biphenyl-4-yl)prop-2-enoyl]-L-phenylalanyl}amino)-5-phenylpent-2-enoate::ethyl (2E,4S)-5-phenyl-4-[(2S)-3-phenyl-2-[(2E)-3-(4-phenylphenyl)prop-2-enamido]propanamido]pent-2-enoate::jm5b01461, Compound 6	3C-like proteinase (3CL-PRO)	Human SARS coronavirus		10000			10.1021/acs.jmedchem.5b01461	http://www.bindingdb.org/jsp/dbsearch/PrimarySearch_ki.jsp?energyterm=kJ/mole&tag=r21&monomerid=11259&enzyme=3C-like+proteinase+%283CL-PRO%29&column=ki&startPg=0&Increment=50&submit=Search	15959302			ZINC14947924
868532	CCOC(=O)\C=C\[C@H](Cc1ccccc1)NC(=O)[C@H](Cc1ccccc1)NC(=O)\C=C\c1ccc(cc1)-c1ccccc1	PQFVYUJGFLSMKA-PFKUUMJMSA-N	dipeptidomimetic unsaturated ester 18a::ethyl (2E,4S)-4-({N-[(2E)-3-(1,1-biphenyl-4-yl)prop-2-enoyl]-L-phenylalanyl}amino)-5-phenylpent-2-enoate::ethyl (2E,4S)-5-phenyl-4-[(2S)-3-phenyl-2-[(2E)-3-(4-phenylphenyl)prop-2-enamido]propanamido]pent-2-enoate::jm5b01461, Compound 6	3C-like proteinase (3CL-PRO)	Human SARS coronavirus	6440				10.1021/acs.jmedchem.5b01461	http://www.bindingdb.org/jsp/dbsearch/PrimarySearch_ki.jsp?energyterm=kJ/mole&tag=r21&monomerid=11259&enzyme=3C-like+proteinase+%283CL-PRO%29&column=ki&startPg=0&Increment=50&submit=Search	15959302			ZINC14947924
868533	CCOC(=O)\C=C\[C@H](Cc1ccccc1)NC(=O)[C@H](Cc1ccccc1)NC(=O)\C=C\c1ccc(cc1)-c1ccccc1	PQFVYUJGFLSMKA-PFKUUMJMSA-N	dipeptidomimetic unsaturated ester 18a::ethyl (2E,4S)-4-({N-[(2E)-3-(1,1-biphenyl-4-yl)prop-2-enoyl]-L-phenylalanyl}amino)-5-phenylpent-2-enoate::ethyl (2E,4S)-5-phenyl-4-[(2S)-3-phenyl-2-[(2E)-3-(4-phenylphenyl)prop-2-enamido]propanamido]pent-2-enoate::jm5b01461, Compound 6	3C-like proteinase (3CL-PRO)	Human SARS coronavirus				18800	10.1021/acs.jmedchem.5b01461	http://www.bindingdb.org/jsp/dbsearch/PrimarySearch_ki.jsp?energyterm=kJ/mole&tag=r21&monomerid=11259&enzyme=3C-like+proteinase+%283CL-PRO%29&column=ki&startPg=0&Increment=50&submit=Search	15959302			ZINC14947924
868534	CCOC(=O)\C=C\[C@H](Cc1ccccc1)NC(=O)[C@H](Cc1ccccc1)NC(=O)\C=C\c1ccc(cc1)[N+]([O-])=O	XAYRYKDJTCRRDA-FGOHTXDJSA-N	jm5b01461, Compound 7	3C-like proteinase (3CL-PRO)	Human SARS coronavirus		5000			10.1021/acs.jmedchem.5b01461	http://www.bindingdb.org/jsp/dbsearch/PrimarySearch_ki.jsp?energyterm=kJ/mole&tag=r21&monomerid=428894&enzyme=3C-like+proteinase+%283CL-PRO%29&column=ki&startPg=0&Increment=50&submit=Search	15959303
868535	CCOC(=O)\C=C\[C@H](Cc1ccccc1)NC(=O)[C@H](Cc1ccccc1)NC(=O)\C=C\c1ccc(cc1)[N+]([O-])=O	XAYRYKDJTCRRDA-FGOHTXDJSA-N	jm5b01461, Compound 7	3C-like proteinase (3CL-PRO)	Human SARS coronavirus	2480				10.1021/acs.jmedchem.5b01461	http://www.bindingdb.org/jsp/dbsearch/PrimarySearch_ki.jsp?energyterm=kJ/mole&tag=r21&monomerid=428894&enzyme=3C-like+proteinase+%283CL-PRO%29&column=ki&startPg=0&Increment=50&submit=Search	15959303
868536	CCOC(=O)\C=C\[C@H](Cc1ccccc1)NC(=O)[C@H](Cc1ccccc1)NC(=O)\C=C\c1ccc(cc1)[N+]([O-])=O	XAYRYKDJTCRRDA-FGOHTXDJSA-N	jm5b01461, Compound 7	3C-like proteinase (3CL-PRO)	Human SARS coronavirus				9450	10.1021/acs.jmedchem.5b01461	http://www.bindingdb.org/jsp/dbsearch/PrimarySearch_ki.jsp?energyterm=kJ/mole&tag=r21&monomerid=428894&enzyme=3C-like+proteinase+%283CL-PRO%29&column=ki&startPg=0&Increment=50&submit=Search	15959303
868537	CCOC(=O)\C=C\[C@H](Cc1ccccc1)NC(=O)[C@H](Cc1ccccc1)NC(=O)\C=C\c1ccc(cc1)N(C)C	JWPLKCWYGMPRGX-ZIIPDIQWSA-N	dipeptidomimetic unsaturated ester 18c::ethyl (2E,4S)-4-[(2S)-2-[(2E)-3-[4-(dimethylamino)phenyl]prop-2-enamido]-3-phenylpropanamido]-5-phenylpent-2-enoate::ethyl (2E,4S)-4-[(N-{(2E)-3-[4-(dimethylamino)phenyl]prop-2-enoyl}-L-phenylalanyl)amino]-5-phenylpent-2-enoate::med.21724, Compound 39	3C-like proteinase (3CL-PRO)	Human SARS coronavirus		1000			10.1021/acs.jmedchem.5b01461	http://www.bindingdb.org/jsp/dbsearch/PrimarySearch_ki.jsp?energyterm=kJ/mole&tag=r21&monomerid=11261&enzyme=3C-like+proteinase+%283CL-PRO%29&column=ki&startPg=0&Increment=50&submit=Search	11555658			ZINC14947930
868538	CCOC(=O)\C=C\[C@H](Cc1ccccc1)NC(=O)[C@H](Cc1ccccc1)NC(=O)\C=C\c1ccc(cc1)N(C)C	JWPLKCWYGMPRGX-ZIIPDIQWSA-N	dipeptidomimetic unsaturated ester 18c::ethyl (2E,4S)-4-[(2S)-2-[(2E)-3-[4-(dimethylamino)phenyl]prop-2-enamido]-3-phenylpropanamido]-5-phenylpent-2-enoate::ethyl (2E,4S)-4-[(N-{(2E)-3-[4-(dimethylamino)phenyl]prop-2-enoyl}-L-phenylalanyl)amino]-5-phenylpent-2-enoate::med.21724, Compound 39	3C-like proteinase (3CL-PRO)	Human SARS coronavirus	520				10.1021/acs.jmedchem.5b01461	http://www.bindingdb.org/jsp/dbsearch/PrimarySearch_ki.jsp?energyterm=kJ/mole&tag=r21&monomerid=11261&enzyme=3C-like+proteinase+%283CL-PRO%29&column=ki&startPg=0&Increment=50&submit=Search	11555658			ZINC14947930
868539	CCOC(=O)\C=C\[C@H](Cc1ccccc1)NC(=O)[C@H](Cc1ccccc1)NC(=O)\C=C\c1ccc(cc1)N(C)C	JWPLKCWYGMPRGX-ZIIPDIQWSA-N	dipeptidomimetic unsaturated ester 18c::ethyl (2E,4S)-4-[(2S)-2-[(2E)-3-[4-(dimethylamino)phenyl]prop-2-enamido]-3-phenylpropanamido]-5-phenylpent-2-enoate::ethyl (2E,4S)-4-[(N-{(2E)-3-[4-(dimethylamino)phenyl]prop-2-enoyl}-L-phenylalanyl)amino]-5-phenylpent-2-enoate::med.21724, Compound 39	3C-like proteinase (3CL-PRO)	Human SARS coronavirus				180	10.1021/acs.jmedchem.5b01461	http://www.bindingdb.org/jsp/dbsearch/PrimarySearch_ki.jsp?energyterm=kJ/mole&tag=r21&monomerid=11261&enzyme=3C-like+proteinase+%283CL-PRO%29&column=ki&startPg=0&Increment=50&submit=Search	11555658			ZINC14947930
868540	CCOC(=O)\C=C\[C@H](Cc1ccccc1)NC(=O)[C@H](Cc1ccccc1)NC(=O)\C=C\c1ccc(OC)cc1OC	ACACSUQRMWRCPB-FUNSLCGPSA-N	dipeptidomimetic unsaturated ester 18d::ethyl (2E,4S)-4-({N-[(2E)-3-(2,4-dimethoxyphenyl)prop-2-enoyl]-L-phenylalanyl}amino)-5-phenylpent-2-enoate::ethyl (2E,4S)-4-[(2S)-2-[(2E)-3-(2,4-dimethoxyphenyl)prop-2-enamido]-3-phenylpropanamido]-5-phenylpent-2-enoate::jm5b01461, Compound 9	3C-like proteinase (3CL-PRO)	Human SARS coronavirus		10000			10.1021/acs.jmedchem.5b01461	http://www.bindingdb.org/jsp/dbsearch/PrimarySearch_ki.jsp?energyterm=kJ/mole&tag=r21&monomerid=11262&enzyme=3C-like+proteinase+%283CL-PRO%29&column=ki&startPg=0&Increment=50&submit=Search	15959304			ZINC14947933
868541	CCOC(=O)\C=C\[C@H](Cc1ccccc1)NC(=O)[C@H](Cc1ccccc1)NC(=O)\C=C\c1ccc(OC)cc1OC	ACACSUQRMWRCPB-FUNSLCGPSA-N	dipeptidomimetic unsaturated ester 18d::ethyl (2E,4S)-4-({N-[(2E)-3-(2,4-dimethoxyphenyl)prop-2-enoyl]-L-phenylalanyl}amino)-5-phenylpent-2-enoate::ethyl (2E,4S)-4-[(2S)-2-[(2E)-3-(2,4-dimethoxyphenyl)prop-2-enamido]-3-phenylpropanamido]-5-phenylpent-2-enoate::jm5b01461, Compound 9	3C-like proteinase (3CL-PRO)	Human SARS coronavirus	9040				10.1021/acs.jmedchem.5b01461	http://www.bindingdb.org/jsp/dbsearch/PrimarySearch_ki.jsp?energyterm=kJ/mole&tag=r21&monomerid=11262&enzyme=3C-like+proteinase+%283CL-PRO%29&column=ki&startPg=0&Increment=50&submit=Search	15959304			ZINC14947933
868542	CCOC(=O)\C=C\[C@H](Cc1ccccc1)NC(=O)[C@H](Cc1ccccc1)NC(=O)\C=C\c1ccc(OC)cc1OC	ACACSUQRMWRCPB-FUNSLCGPSA-N	dipeptidomimetic unsaturated ester 18d::ethyl (2E,4S)-4-({N-[(2E)-3-(2,4-dimethoxyphenyl)prop-2-enoyl]-L-phenylalanyl}amino)-5-phenylpent-2-enoate::ethyl (2E,4S)-4-[(2S)-2-[(2E)-3-(2,4-dimethoxyphenyl)prop-2-enamido]-3-phenylpropanamido]-5-phenylpent-2-enoate::jm5b01461, Compound 9	3C-like proteinase (3CL-PRO)	Human SARS coronavirus				110	10.1021/acs.jmedchem.5b01461	http://www.bindingdb.org/jsp/dbsearch/PrimarySearch_ki.jsp?energyterm=kJ/mole&tag=r21&monomerid=11262&enzyme=3C-like+proteinase+%283CL-PRO%29&column=ki&startPg=0&Increment=50&submit=Search	15959304			ZINC14947933
868543	CCOC(=O)C=CC(CC1CCNC1=O)NC(=O)C(CC(=O)C(NC(=O)c1cc(C)on1)C(C)C)Cc1ccc(F)cc1	CAYJBRBGZBCZKO-UHFFFAOYSA-N	jm5b01461, Compound 2	3C-like proteinase (3CL-PRO)	Human SARS coronavirus	>10000				10.1021/acs.jmedchem.5b01461	http://www.bindingdb.org/jsp/dbsearch/PrimarySearch_ki.jsp?energyterm=kJ/mole&tag=r21&monomerid=428946&enzyme=3C-like+proteinase+%283CL-PRO%29&column=ki&startPg=0&Increment=50&submit=Search	11456159
868545	CCOC(=O)C=C[C@H](C[C@@H]1CCNC1=O)NC(=O)[C@@H](Cc1ccccc1)NC(=O)[C@@H](NC(=O)OCc1ccccc1)C(C)C	MQOSRSSZYUXZNH-XLAWAOJPSA-N	jm5b01461, Compound 16	3C-like proteinase (3CL-PRO)	Human SARS coronavirus	2260				10.1021/acs.jmedchem.5b01461	http://www.bindingdb.org/jsp/dbsearch/PrimarySearch_ki.jsp?energyterm=kJ/mole&tag=r21&monomerid=428969&enzyme=3C-like+proteinase+%283CL-PRO%29&column=ki&startPg=0&Increment=50&submit=Search	154732686
868547	CCOC(=O)C=C[C@H](C[C@@H]1CCNC1=O)NC(=O)[C@@H](CC(C)C)NC(=O)[C@@H](NC(=O)OCc1ccccc1)C(C)C	WDMSWWUPIMEGNZ-CDFYKHGPSA-N	jm5b01461, Compound 17	3C-like proteinase (3CL-PRO)	Human SARS coronavirus	660				10.1021/acs.jmedchem.5b01461	http://www.bindingdb.org/jsp/dbsearch/PrimarySearch_ki.jsp?energyterm=kJ/mole&tag=r21&monomerid=428975&enzyme=3C-like+proteinase+%283CL-PRO%29&column=ki&startPg=0&Increment=50&submit=Search	154732690
868549	CCOC(=O)C=C[C@H](C[C@@H]1CCNC1=O)NC(=O)[C@@H](CC(C)C)NC(=O)[C@@H](NC(=O)OCc1ccccc1)C(C)OC(C)(C)C	PWBQMVUCCVWDEJ-IVJZDMNDSA-N	jm5b01461, Compound 18	3C-like proteinase (3CL-PRO)	Human SARS coronavirus	50				10.1021/acs.jmedchem.5b01461	http://www.bindingdb.org/jsp/dbsearch/PrimarySearch_ki.jsp?energyterm=kJ/mole&tag=r21&monomerid=428977&enzyme=3C-like+proteinase+%283CL-PRO%29&column=ki&startPg=0&Increment=50&submit=Search	154732691
868551	CC(C)C[C@H](NC(=O)C(NC(=O)[C@@H](NC(C)=O)C(C)C)C(C)OCc1ccccc1)C(=O)N[C@@H](CCC(=O)N(C)C)C(=O)Cn1[nH]c(=O)c2ccccc2c1=O	IHADTPBMTBSIET-AQYPRIEESA-N	jm5b01461, Compound 19	3C-like proteinase (3CL-PRO)	Human SARS coronavirus		64000			10.1021/acs.jmedchem.5b01461	http://www.bindingdb.org/jsp/dbsearch/PrimarySearch_ki.jsp?energyterm=kJ/mole&tag=r21&monomerid=428978&enzyme=3C-like+proteinase+%283CL-PRO%29&column=ki&startPg=0&Increment=50&submit=Search	154732692
868552	CC(C)C[C@H](NC(=O)C(NC(=O)[C@@H](NC(C)=O)C(C)C)C(C)O)C(=O)N[C@@H](CCC(=O)N(C)C)C(=O)Cn1[nH]c(=O)c2ccccc2c1=O	FJDPRIAVXQJFHN-NMFGIXPLSA-N	jm5b01461, Compound 20	3C-like proteinase (3CL-PRO)	Human SARS coronavirus		28000			10.1021/acs.jmedchem.5b01461	http://www.bindingdb.org/jsp/dbsearch/PrimarySearch_ki.jsp?energyterm=kJ/mole&tag=r21&monomerid=428983&enzyme=3C-like+proteinase+%283CL-PRO%29&column=ki&startPg=0&Increment=50&submit=Search	154732693
868553	CC(C)C[C@H](NC(=O)C(NC(=O)[C@@H](NC(C)=O)C(C)C)C(C)OCc1ccccc1)C(=O)N[C@@H](CCC(=O)N(C)C)C(=O)Cn1[nH]c(=O)c2c(cccc2c1=O)[N+]([O-])=O	FPOUHYIBNRERGL-SIWGTWLLSA-N	jm5b01461, Compound 21	3C-like proteinase (3CL-PRO)	Human SARS coronavirus		70000			10.1021/acs.jmedchem.5b01461	http://www.bindingdb.org/jsp/dbsearch/PrimarySearch_ki.jsp?energyterm=kJ/mole&tag=r21&monomerid=428984&enzyme=3C-like+proteinase+%283CL-PRO%29&column=ki&startPg=0&Increment=50&submit=Search	154732694
868554	CC(C)C[C@H](NC(=O)C(NC(=O)[C@@H](NC(C)=O)C(C)C)C(C)O)C(=O)N[C@@H](CCC(=O)N(C)C)C(=O)Cn1[nH]c(=O)c2c(cccc2c1=O)[N+]([O-])=O	AAKLLOMUJFZNEN-MDRPYSOZSA-N	jm5b01461, Compound 22	3C-like proteinase (3CL-PRO)	Human SARS coronavirus		53000			10.1021/acs.jmedchem.5b01461	http://www.bindingdb.org/jsp/dbsearch/PrimarySearch_ki.jsp?energyterm=kJ/mole&tag=r21&monomerid=428987&enzyme=3C-like+proteinase+%283CL-PRO%29&column=ki&startPg=0&Increment=50&submit=Search	154732695
868555	CC(C)C[C@H](NC(=O)C(NC(=O)[C@@H](NC(C)=O)C(C)C)C(C)O)C(=O)N[C@@H](C[C@@H]1CCNC1=O)C(=O)Cn1[nH]c(=O)c2ccccc2c1=O	OJHHBYMVWJMTGA-XDEPFDFKSA-N	jm5b01461, Compound 23	3C-like proteinase (3CL-PRO)	Human SARS coronavirus		2700			10.1021/acs.jmedchem.5b01461	http://www.bindingdb.org/jsp/dbsearch/PrimarySearch_ki.jsp?energyterm=kJ/mole&tag=r21&monomerid=428988&enzyme=3C-like+proteinase+%283CL-PRO%29&column=ki&startPg=0&Increment=50&submit=Search	154732696
868556	CC(C)C[C@H](NC(=O)C(NC(=O)[C@@H](NC(C)=O)C(C)C)C(C)OCc1ccccc1)C(=O)N[C@@H](C[C@@H]1CCNC1=O)C(=O)Cn1[nH]c(=O)c2ccccc2c1=O	WVCBNUTYVOLXDN-FWKPESFTSA-N	jm5b01461, Compound 24	3C-like proteinase (3CL-PRO)	Human SARS coronavirus		2900			10.1021/acs.jmedchem.5b01461	http://www.bindingdb.org/jsp/dbsearch/PrimarySearch_ki.jsp?energyterm=kJ/mole&tag=r21&monomerid=428989&enzyme=3C-like+proteinase+%283CL-PRO%29&column=ki&startPg=0&Increment=50&submit=Search	154732697
868557	CC(C)C[C@H](NC(=O)C(NC(=O)[C@@H](NC(C)=O)C(C)C)C(C)OCc1ccccc1)C(=O)N[C@@H](C[C@@H]1CCNC1=O)C(=O)Cn1[nH]c(=O)c2c(cccc2c1=O)[N+]([O-])=O	TYWILPQKGVLDRA-UIQXPBATSA-N	jm5b01461, Compound 25	3C-like proteinase (3CL-PRO)	Human SARS coronavirus		600			10.1021/acs.jmedchem.5b01461	http://www.bindingdb.org/jsp/dbsearch/PrimarySearch_ki.jsp?energyterm=kJ/mole&tag=r21&monomerid=428990&enzyme=3C-like+proteinase+%283CL-PRO%29&column=ki&startPg=0&Increment=50&submit=Search	154732698
868558	CC(C)C[C@H](NC(=O)C(NC(=O)[C@@H](NC(C)=O)C(C)C)C(C)O)C(=O)N[C@@H](C[C@@H]1CCNC1=O)C(=O)Cn1[nH]c(=O)c2c(cccc2c1=O)[N+]([O-])=O	WLFJZNRFNKLNOW-IZHLMMGISA-N	jm5b01461, Compound 26	3C-like proteinase (3CL-PRO)	Human SARS coronavirus		3400			10.1021/acs.jmedchem.5b01461	http://www.bindingdb.org/jsp/dbsearch/PrimarySearch_ki.jsp?energyterm=kJ/mole&tag=r21&monomerid=428994&enzyme=3C-like+proteinase+%283CL-PRO%29&column=ki&startPg=0&Increment=50&submit=Search	154732699
868559	Oc1ccc(Cl)cc1C(=O)Nc1ccc(cc1Cl)[N+]([O-])=O	RJMUSRYZPJIFPJ-UHFFFAOYSA-N	5-chloro-N-(2-chloro-4-nitrophenyl)-2-hydroxybenzamide::med.21724, Compound 76::niclosamide	3C-like proteinase (3CL-PRO)	Human SARS coronavirus		>50000			10.1021/acs.jmedchem.5b01461	http://www.bindingdb.org/jsp/dbsearch/PrimarySearch_ki.jsp?energyterm=kJ/mole&tag=r21&monomerid=11242&enzyme=3C-like+proteinase+%283CL-PRO%29&column=ki&startPg=0&Increment=50&submit=Search	4477		DB06803	ZINC03874496
868560	CN(C)c1ccc(cc1)C(=O)N[C@@H](Cc1ccccc1)C(=O)Nc1ccc(cc1Cl)[N+]([O-])=O	NBBWJEWPUKPHPZ-QFIPXVFZSA-N	(2S)-N-(2-chloro-4-nitrophenyl)-2-{[4-(dimethylamino)phenyl]formamido}-3-phenylpropanamide::Anilide Inhibitor 2a::N-(2-chloro-4-nitrophenyl)-N-[4-(dimethylamino)benzoyl]-L-phenylalaninamide::med.21724, Compound 77	3C-like proteinase (3CL-PRO)	Human SARS coronavirus		60			10.1021/acs.jmedchem.5b01461	http://www.bindingdb.org/jsp/dbsearch/PrimarySearch_ki.jsp?energyterm=kJ/mole&tag=r21&monomerid=11234&enzyme=3C-like+proteinase+%283CL-PRO%29&column=ki&startPg=0&Increment=50&submit=Search	11317290			ZINC13646492
868561	[O-][N+](=O)c1ccc(NC(=O)[C@H](Cc2ccccc2)NC(=O)c2ccccc2)c(Cl)c1	FXDVSEXSZHQYNI-FQEVSTJZSA-N	jm5b01461, Compound 30	3C-like proteinase (3CL-PRO)	Human SARS coronavirus		>10000			10.1021/acs.jmedchem.5b01461	http://www.bindingdb.org/jsp/dbsearch/PrimarySearch_ki.jsp?energyterm=kJ/mole&tag=r21&monomerid=429077&enzyme=3C-like+proteinase+%283CL-PRO%29&column=ki&startPg=0&Increment=50&submit=Search	11189425
868562	[O-][N+](=O)c1ccc(cc1)C(=O)N[C@@H](Cc1ccccc1)C(=O)Nc1ccc(cc1Cl)[N+]([O-])=O	SMBFRPGYZZBJJN-FQEVSTJZSA-N	jm5b01461, Compound 31	3C-like proteinase (3CL-PRO)	Human SARS coronavirus		>10000			10.1021/acs.jmedchem.5b01461	http://www.bindingdb.org/jsp/dbsearch/PrimarySearch_ki.jsp?energyterm=kJ/mole&tag=r21&monomerid=429079&enzyme=3C-like+proteinase+%283CL-PRO%29&column=ki&startPg=0&Increment=50&submit=Search	11305900
868563	[O-][N+](=O)c1ccc(NC(=O)[C@H](Cc2ccccc2)NC(=O)c2ccccc2)cc1	PZXSBPUCCSKZFZ-FQEVSTJZSA-N	jm5b01461, Compound 32	3C-like proteinase (3CL-PRO)	Human SARS coronavirus		>10000			10.1021/acs.jmedchem.5b01461	http://www.bindingdb.org/jsp/dbsearch/PrimarySearch_ki.jsp?energyterm=kJ/mole&tag=r21&monomerid=429081&enzyme=3C-like+proteinase+%283CL-PRO%29&column=ki&startPg=0&Increment=50&submit=Search	7200312
868564	CN(C)c1ccc(cc1)C(=O)N[C@@H](Cc1ccccc1)C(=O)Nc1ccc(cc1)[N+]([O-])=O	IWQFYHUNPNJZET-QFIPXVFZSA-N	jm5b01461, Compound 33	3C-like proteinase (3CL-PRO)	Human SARS coronavirus		>10000			10.1021/acs.jmedchem.5b01461	http://www.bindingdb.org/jsp/dbsearch/PrimarySearch_ki.jsp?energyterm=kJ/mole&tag=r21&monomerid=429083&enzyme=3C-like+proteinase+%283CL-PRO%29&column=ki&startPg=0&Increment=50&submit=Search	11430407
868565	CN(C)c1ccc(cc1)C(=O)N[C@@H](Cc1ccccc1)C(=O)Nc1ccccc1	GPSHAEBYJLCMDC-QFIPXVFZSA-N	jm5b01461, Compound 34	3C-like proteinase (3CL-PRO)	Human SARS coronavirus		>10000			10.1021/acs.jmedchem.5b01461	http://www.bindingdb.org/jsp/dbsearch/PrimarySearch_ki.jsp?energyterm=kJ/mole&tag=r21&monomerid=429084&enzyme=3C-like+proteinase+%283CL-PRO%29&column=ki&startPg=0&Increment=50&submit=Search	11200051
868566	CN(C)c1ccc(cc1)C(=O)N[C@@H](Cc1ccccc1)C(=O)Nc1ccccc1Cl	BLVKWTTVQWKNFW-QFIPXVFZSA-N	jm5b01461, Compound 35	3C-like proteinase (3CL-PRO)	Human SARS coronavirus		>10000			10.1021/acs.jmedchem.5b01461	http://www.bindingdb.org/jsp/dbsearch/PrimarySearch_ki.jsp?energyterm=kJ/mole&tag=r21&monomerid=429085&enzyme=3C-like+proteinase+%283CL-PRO%29&column=ki&startPg=0&Increment=50&submit=Search	11258716
868567	O=C[C@H](Cc1ccccc1)NC(=O)[C@H](Cc1ccccc1)NC(=O)\C=C\c1ccccc1	CBNZTDULZKZFFM-KQRRRSJSSA-N	jm5b01461, Compound 44	3C-like proteinase (3CL-PRO)	Human SARS coronavirus	2240				10.1021/acs.jmedchem.5b01461	http://www.bindingdb.org/jsp/dbsearch/PrimarySearch_ki.jsp?energyterm=kJ/mole&tag=r21&monomerid=429086&enzyme=3C-like+proteinase+%283CL-PRO%29&column=ki&startPg=0&Increment=50&submit=Search	154732700
868568	CC(OC(C)(C)C)[C@H](NC(=O)OCc1ccccc1)C(=O)N[C@@H](CC1CCCCC1)C(=O)N[C@@H](C[C@@H]1CCNC1=O)C=O	YFUZVOLEKQFVCQ-OKCRAPNYSA-N	MPI8::jm5b01461, Compound 45	3C-like proteinase (3CL-PRO)	Human SARS coronavirus	53				10.1021/acs.jmedchem.5b01461	http://www.bindingdb.org/jsp/dbsearch/PrimarySearch_ki.jsp?energyterm=kJ/mole&tag=r21&monomerid=429100&enzyme=3C-like+proteinase+%283CL-PRO%29&column=ki&startPg=0&Increment=50&submit=Search	11456186
868569	CC(OC(C)(C)C)[C@H](NC(=O)OCc1ccccc1)C(=O)N[C@@H](CC1CCCCC1)C(=O)N[C@@H](C[C@@H]1CCNC1=O)C=O	YFUZVOLEKQFVCQ-OKCRAPNYSA-N	MPI8::jm5b01461, Compound 45	3C-like proteinase (3CL-PRO)	Human SARS coronavirus		600			10.1021/acs.jmedchem.5b01461	http://www.bindingdb.org/jsp/dbsearch/PrimarySearch_ki.jsp?energyterm=kJ/mole&tag=r21&monomerid=429100&enzyme=3C-like+proteinase+%283CL-PRO%29&column=ki&startPg=0&Increment=50&submit=Search	11456186
868572	CC(C)C[C@H](NC(=O)[C@@H](NC(=O)[C@H](C)NC(=O)[C@H](CO)NC(C)=O)C(C)C)C(=O)N[C@@H](CCC(=O)N(C)C)C=O	SYPDBXVHHYPEDE-OYJIISJGSA-N	CHEMBL479724::med.21724, Compound 44	3C-like proteinase (3CL-PRO)	Human SARS coronavirus		37000			10.1021/acs.jmedchem.5b01461	http://www.bindingdb.org/jsp/dbsearch/PrimarySearch_ki.jsp?energyterm=kJ/mole&tag=r21&monomerid=50484479&enzyme=3C-like+proteinase+%283CL-PRO%29&column=ki&startPg=0&Increment=50&submit=Search	44590140
868573	CC(C)[C@H](NC(=O)[C@H](C)NC(=O)[C@H](CO)NC(C)=O)C(=O)N[C@@H](CC1CCCCC1)C(=O)N[C@@H](Cc1c[nH]cn1)C=O	SENRSUXIIOUWCL-KELSAIANSA-N	CHEMBL1929019::jm5b01461, Compound 47	3C-like proteinase (3CL-PRO)	Human SARS coronavirus		65			10.1021/acs.jmedchem.5b01461	http://www.bindingdb.org/jsp/dbsearch/PrimarySearch_ki.jsp?energyterm=kJ/mole&tag=r21&monomerid=50484478&enzyme=3C-like+proteinase+%283CL-PRO%29&column=ki&startPg=0&Increment=50&submit=Search	54592394
868574	CC(C)C[C@H](NC(=O)[C@@H](NC(=O)[C@H](C)NC(=O)[C@H](CO)NC(C)=O)C(C)C)C(=O)N[C@@H](Cc1c[nH]cn1)C=O	AEYIBAPLFDNVGD-JMMIECQRSA-N	CHEMBL1929017::med.21724, Compound 45	3C-like proteinase (3CL-PRO)	Human SARS coronavirus		98			10.1021/acs.jmedchem.5b01461	http://www.bindingdb.org/jsp/dbsearch/PrimarySearch_ki.jsp?energyterm=kJ/mole&tag=r21&monomerid=50484482&enzyme=3C-like+proteinase+%283CL-PRO%29&column=ki&startPg=0&Increment=50&submit=Search	54592395
868575	CC(C)C[C@H](NC(=O)OCc1ccccc1)C(=O)N[C@@H](CCC(=O)N(C)C)C(=O)CF	UBPKJZUVHMCXAZ-ROUUACIJSA-N	jm5b01461, Compound 49	3C-like proteinase (3CL-PRO)	Human SARS coronavirus		3600			10.1021/acs.jmedchem.5b01461	http://www.bindingdb.org/jsp/dbsearch/PrimarySearch_ki.jsp?energyterm=kJ/mole&tag=r21&monomerid=429138&enzyme=3C-like+proteinase+%283CL-PRO%29&column=ki&startPg=0&Increment=50&submit=Search	11561189
868576	CCC(C)[C@H](NC(=O)OCc1ccccc1)C(=O)N[C@@H](CCC(=O)N(C)C)C(=O)CF	RKGZUGUTFRGBHD-LXKGCQHHSA-N	jm5b01461, Compound 50	3C-like proteinase (3CL-PRO)	Human SARS coronavirus		8900			10.1021/acs.jmedchem.5b01461	http://www.bindingdb.org/jsp/dbsearch/PrimarySearch_ki.jsp?energyterm=kJ/mole&tag=r21&monomerid=429146&enzyme=3C-like+proteinase+%283CL-PRO%29&column=ki&startPg=0&Increment=50&submit=Search	154732702
868577	CC(C)[C@H](NC(=O)OCc1ccccc1)C(=O)N[C@@H](CCC(=O)N(C)C)C(=O)CF	CAZMERAZKBCKSZ-LPHOPBHVSA-N	jm5b01461, Compound 51	3C-like proteinase (3CL-PRO)	Human SARS coronavirus		6200			10.1021/acs.jmedchem.5b01461	http://www.bindingdb.org/jsp/dbsearch/PrimarySearch_ki.jsp?energyterm=kJ/mole&tag=r21&monomerid=429154&enzyme=3C-like+proteinase+%283CL-PRO%29&column=ki&startPg=0&Increment=50&submit=Search	11546325
868578	CN(C)C(=O)CC[C@H](NC(=O)CNC(=O)OCc1ccccc1)C(=O)CF	HMXBVASPAGOLIL-AWEZNQCLSA-N	jm5b01461, Compound 52	3C-like proteinase (3CL-PRO)	Human SARS coronavirus		>100000			10.1021/acs.jmedchem.5b01461	http://www.bindingdb.org/jsp/dbsearch/PrimarySearch_ki.jsp?energyterm=kJ/mole&tag=r21&monomerid=429159&enzyme=3C-like+proteinase+%283CL-PRO%29&column=ki&startPg=0&Increment=50&submit=Search	11516464
868579	C[C@H](NC(=O)OCc1ccccc1)C(=O)N[C@@H](CCC(=O)N(C)C)C(=O)CF	NBTZKNVHPWRYEI-ZFWWWQNUSA-N	jm5b01461, Compound 53	3C-like proteinase (3CL-PRO)	Human SARS coronavirus		>100000			10.1021/acs.jmedchem.5b01461	http://www.bindingdb.org/jsp/dbsearch/PrimarySearch_ki.jsp?energyterm=kJ/mole&tag=r21&monomerid=429212&enzyme=3C-like+proteinase+%283CL-PRO%29&column=ki&startPg=0&Increment=50&submit=Search	11502116
868580	CC(C)[C@H](NC(=O)OCc1ccccc1)C(=O)N[C@@H](CC(O)=O)C(=O)CF	LYBWGROBJJXCJJ-BBRMVZONSA-N	jm5b01461, Compound 54	3C-like proteinase (3CL-PRO)	Human SARS coronavirus		>100000			10.1021/acs.jmedchem.5b01461	http://www.bindingdb.org/jsp/dbsearch/PrimarySearch_ki.jsp?energyterm=kJ/mole&tag=r21&monomerid=429218&enzyme=3C-like+proteinase+%283CL-PRO%29&column=ki&startPg=0&Increment=50&submit=Search	9907987
868581	CC(C)C[C@H](NC(=O)[C@@H](NC(=O)OCc1ccccc1)C(C)C)C(=O)N[C@@H](CCC(O)=O)C(=O)C(F)(F)F	YLUXVNBHWOCFLK-BJLQDIEVSA-N	CHEMBL551569::med.21724, Compound 69	3C-like proteinase (3CL-PRO)	Human SARS coronavirus	116000				10.1021/acs.jmedchem.5b01461	http://www.bindingdb.org/jsp/dbsearch/PrimarySearch_ki.jsp?energyterm=kJ/mole&tag=r21&monomerid=50480487&enzyme=3C-like+proteinase+%283CL-PRO%29&column=ki&startPg=0&Increment=50&submit=Search	16085283
868582	CC(C)C[C@H](NC(=O)[C@@H](NC(=O)OCc1ccccc1)C(C)C)C(=O)N[C@@H](CCC(N)=O)C(=O)C(F)(F)F	UNYNAJFHPZRULF-BJLQDIEVSA-N	jm5b01461, Compound 56	3C-like proteinase (3CL-PRO)	Human SARS coronavirus	116000				10.1021/acs.jmedchem.5b01461	http://www.bindingdb.org/jsp/dbsearch/PrimarySearch_ki.jsp?energyterm=kJ/mole&tag=r21&monomerid=429239&enzyme=3C-like+proteinase+%283CL-PRO%29&column=ki&startPg=0&Increment=50&submit=Search	16085282
868583	CC(C)C[C@H](NC(=O)[C@@H](NC(=O)OCc1ccccc1)C(C)C)C(=O)N[C@@H](CCC(=O)N1CCOCC1)C(=O)C(F)(F)F	FJHQYYMVIUHRDC-FIXSFTCYSA-N	CHEMBL555061::med.21724, Compound 70	3C-like proteinase (3CL-PRO)	Human SARS coronavirus	21000				10.1021/acs.jmedchem.5b01461	http://www.bindingdb.org/jsp/dbsearch/PrimarySearch_ki.jsp?energyterm=kJ/mole&tag=r21&monomerid=50480488&enzyme=3C-like+proteinase+%283CL-PRO%29&column=ki&startPg=0&Increment=50&submit=Search	45269761
868584	CC(C)C[C@H](NC(=O)[C@@H](NC(=O)OCc1ccccc1)C(C)C)C(=O)N[C@@H](C[C@@H]1CCNC1=O)C(=O)c1nccs1	NHPGFNNCMAVKMC-MLCQCVOFSA-N	CHEMBL539209::jm5b01461, Compound 58	3C-like proteinase (3CL-PRO)	Human SARS coronavirus	2200				10.1021/acs.jmedchem.5b01461	http://www.bindingdb.org/jsp/dbsearch/PrimarySearch_ki.jsp?energyterm=kJ/mole&tag=r21&monomerid=50480493&enzyme=3C-like+proteinase+%283CL-PRO%29&column=ki&startPg=0&Increment=50&submit=Search	45272306
868585	COc1cccc2[nH]c(cc12)C(=O)N[C@@H](CC(C)C)C(=O)N[C@@H](C[C@@H]1CCNC1=O)C(=O)c1nc2ccccc2s1	JBLLRCOZJMVOAE-HSQYWUDLSA-N	jm5b01461, Compound 59	3C-like proteinase (3CL-PRO)	Human SARS coronavirus	6.00				10.1021/acs.jmedchem.5b01461	http://www.bindingdb.org/jsp/dbsearch/PrimarySearch_ki.jsp?energyterm=kJ/mole&tag=r21&monomerid=429242&enzyme=3C-like+proteinase+%283CL-PRO%29&column=ki&startPg=0&Increment=50&submit=Search	72708377
868586	CC(C)C[C@H](NC(=O)[C@@H](NC(=O)OCc1cccc(c1)N(C)C)C(C)C)C(=O)N[C@@H](C[C@@H]1CCNC1=O)C(=O)c1nc2ccccc2s1	GWBXIKYLRCLTAU-SINPBGNNSA-N	jm5b01461, Compound 60	3C-like proteinase (3CL-PRO)	Human SARS coronavirus	3.10				10.1021/acs.jmedchem.5b01461	http://www.bindingdb.org/jsp/dbsearch/PrimarySearch_ki.jsp?energyterm=kJ/mole&tag=r21&monomerid=429243&enzyme=3C-like+proteinase+%283CL-PRO%29&column=ki&startPg=0&Increment=50&submit=Search	154732711
868587	CC(C)C[C@H](NC(=O)[C@@H](NC(=O)[C@H](C)NC(=O)OCc1ccccc1)C(C)C)C(=O)N[C@@H](Cc1ccccc1)C(=O)C(F)(F)F	PDLFIYNGGUUVLF-PZYJALBSSA-N	jm5b01461, Compound 61	3C-like proteinase (3CL-PRO)	Human SARS coronavirus		10000			10.1021/acs.jmedchem.5b01461	http://www.bindingdb.org/jsp/dbsearch/PrimarySearch_ki.jsp?energyterm=kJ/mole&tag=r21&monomerid=429244&enzyme=3C-like+proteinase+%283CL-PRO%29&column=ki&startPg=0&Increment=50&submit=Search	73350244
868588	CC(C)C[C@H](NC(=O)OCc1ccccc1)C(=O)N[C@@H](Cc1ccccc1)C(=O)C(F)(F)F	BSABALWHQCEFNU-PMACEKPBSA-N	jm5b01461, Compound 62	3C-like proteinase (3CL-PRO)	Human SARS coronavirus		15000			10.1021/acs.jmedchem.5b01461	http://www.bindingdb.org/jsp/dbsearch/PrimarySearch_ki.jsp?energyterm=kJ/mole&tag=r21&monomerid=429245&enzyme=3C-like+proteinase+%283CL-PRO%29&column=ki&startPg=0&Increment=50&submit=Search	154732712
868589	FC(F)(F)C(=O)[C@H](Cc1ccccc1)NC(=O)[C@H](Cc1ccccc1)NC(=O)OCc1ccccc1	DNINFANNHFQTHQ-GOTSBHOMSA-N	jm5b01461, Compound 63	3C-like proteinase (3CL-PRO)	Human SARS coronavirus		20000			10.1021/acs.jmedchem.5b01461	http://www.bindingdb.org/jsp/dbsearch/PrimarySearch_ki.jsp?energyterm=kJ/mole&tag=r21&monomerid=429246&enzyme=3C-like+proteinase+%283CL-PRO%29&column=ki&startPg=0&Increment=50&submit=Search	102317829
868590	CC(C)C[C@H](NC(=O)OC(C)(C)C)C(=O)N[C@@H](C)C(=O)C(F)(F)F	IRJXEJHJNCVKGL-UWVGGRQHSA-N	jm5b01461, Compound 64	3C-like proteinase (3CL-PRO)	Human SARS coronavirus		40000			10.1021/acs.jmedchem.5b01461	http://www.bindingdb.org/jsp/dbsearch/PrimarySearch_ki.jsp?energyterm=kJ/mole&tag=r21&monomerid=429247&enzyme=3C-like+proteinase+%283CL-PRO%29&column=ki&startPg=0&Increment=50&submit=Search	154732713
868591	C[C@H](NC(=O)[C@H](CCC(O)=O)NC(=O)OC(C)(C)C)C(=O)NCC(=O)C(F)(F)F	IKIPFMQUTJBAKO-IUCAKERBSA-N	jm5b01461, Compound 65	3C-like proteinase (3CL-PRO)	Human SARS coronavirus		40000			10.1021/acs.jmedchem.5b01461	http://www.bindingdb.org/jsp/dbsearch/PrimarySearch_ki.jsp?energyterm=kJ/mole&tag=r21&monomerid=429248&enzyme=3C-like+proteinase+%283CL-PRO%29&column=ki&startPg=0&Increment=50&submit=Search	154732714
868592	C[C@H](NC(=O)[C@@H](N)CCC(O)=O)C(=O)NCC(=O)C(F)(F)F	MKTNGEKTIQHTIL-WDSKDSINSA-N	jm5b01461, Compound 66	3C-like proteinase (3CL-PRO)	Human SARS coronavirus		50000			10.1021/acs.jmedchem.5b01461	http://www.bindingdb.org/jsp/dbsearch/PrimarySearch_ki.jsp?energyterm=kJ/mole&tag=r21&monomerid=429249&enzyme=3C-like+proteinase+%283CL-PRO%29&column=ki&startPg=0&Increment=50&submit=Search	44452182
868593	CCCCCCCCCC(=O)N[C@@H](CC(C)C)C(=O)N[C@@H](Cc1ccccc1)C(=O)C(F)(F)F	YXPNSNGUEDOICU-VXKWHMMOSA-N	jm5b01461, Compound 67	3C-like proteinase (3CL-PRO)	Human SARS coronavirus		50000			10.1021/acs.jmedchem.5b01461	http://www.bindingdb.org/jsp/dbsearch/PrimarySearch_ki.jsp?energyterm=kJ/mole&tag=r21&monomerid=429250&enzyme=3C-like+proteinase+%283CL-PRO%29&column=ki&startPg=0&Increment=50&submit=Search	154732715
868594	CCCCCCCCC(=O)N[C@@H](CC(C)C)C(=O)N[C@@H](Cc1ccccc1)C(=O)C(F)(F)F	PVHORKBRSVOKKL-SFTDATJTSA-N	jm5b01461, Compound 68	3C-like proteinase (3CL-PRO)	Human SARS coronavirus		>50000			10.1021/acs.jmedchem.5b01461	http://www.bindingdb.org/jsp/dbsearch/PrimarySearch_ki.jsp?energyterm=kJ/mole&tag=r21&monomerid=429251&enzyme=3C-like+proteinase+%283CL-PRO%29&column=ki&startPg=0&Increment=50&submit=Search	154732716
868595	O[C@H]([C@H](Cc1c[nH]c2ccccc12)NC(=O)OCc1ccccc1)[C@H](O)[C@H](Cc1c[nH]c2ccccc12)NC(=O)OCc1ccccc1	PEFHEMBSLIFFRC-CLLHQPRTSA-N	jm5b01461, Compound 70	3C-like proteinase (3CL-PRO)	Human SARS coronavirus	340				10.1021/acs.jmedchem.5b01461	http://www.bindingdb.org/jsp/dbsearch/PrimarySearch_ki.jsp?energyterm=kJ/mole&tag=r21&monomerid=429252&enzyme=3C-like+proteinase+%283CL-PRO%29&column=ki&startPg=0&Increment=50&submit=Search	15110210
868596	CC(C)[C@H](NC(=O)[C@H](C)NC(=O)OCc1ccccc1)C(=O)N[C@@H](Cc1c[nH]c2ccccc12)[C@@H](O)[C@H](O)[C@H](Cc1c[nH]c2ccccc12)NC(=O)[C@@H](NC(=O)[C@H](C)NC(=O)OCc1ccccc1)C(C)C	POLUVUUEILGCTM-JWEKRMLRSA-N	jm5b01461, Compound 71	3C-like proteinase (3CL-PRO)	Human SARS coronavirus	73				10.1021/acs.jmedchem.5b01461	http://www.bindingdb.org/jsp/dbsearch/PrimarySearch_ki.jsp?energyterm=kJ/mole&tag=r21&monomerid=429253&enzyme=3C-like+proteinase+%283CL-PRO%29&column=ki&startPg=0&Increment=50&submit=Search	23584956
868597	CCC(=C)C(=O)c1ccc(OCC(O)=O)c(Cl)c1Cl	AVOLMBLBETYQHX-UHFFFAOYSA-N	(2,3-Dichloro-4-(2-methylene-1-oxobutyl)phenoxy)acetic acid::CHEMBL456::ETHACRYNIC ACID::Edecrin::Etacrinic acid::Ethacrynate::Hydromedin::Methylenebutyrylphenoxyacetic acid::[2,3-dichloro-4-(2-methylidenebutanoyl)phenoxy]acetic acid::jm5b01461, Compound 72	3C-like proteinase (3CL-PRO)	Human SARS coronavirus	375000				10.1021/acs.jmedchem.5b01461	http://www.bindingdb.org/jsp/dbsearch/PrimarySearch_ki.jsp?energyterm=kJ/mole&tag=r21&monomerid=50186231&enzyme=3C-like+proteinase+%283CL-PRO%29&column=ki&startPg=0&Increment=50&submit=Search	3278	CHEMBL456	DB00903	ZINC00001382
868598	CCC(=C)C(=O)c1ccc(OCC(=O)NC(=O)OC(C)(C)C)c(Cl)c1Cl	FZROVKDRBUVJGC-UHFFFAOYSA-N	jm5b01461, Compound 73	3C-like proteinase (3CL-PRO)	Human SARS coronavirus	45800				10.1021/acs.jmedchem.5b01461	http://www.bindingdb.org/jsp/dbsearch/PrimarySearch_ki.jsp?energyterm=kJ/mole&tag=r21&monomerid=429255&enzyme=3C-like+proteinase+%283CL-PRO%29&column=ki&startPg=0&Increment=50&submit=Search	154732717
868599	CCC(=C)C(=O)c1ccc(OCC(=O)NC(=O)OC(C)(C)C(N)=O)c(Cl)c1Cl	WYDGCJTUSQAGJG-UHFFFAOYSA-N	jm5b01461, Compound 74	3C-like proteinase (3CL-PRO)	Human SARS coronavirus	35300				10.1021/acs.jmedchem.5b01461	http://www.bindingdb.org/jsp/dbsearch/PrimarySearch_ki.jsp?energyterm=kJ/mole&tag=r21&monomerid=429256&enzyme=3C-like+proteinase+%283CL-PRO%29&column=ki&startPg=0&Increment=50&submit=Search	154732718
868600	Cc1noc(C)c1CC1C(=O)C(=O)c2cc(ccc12)C#N	ZJVUHWZFMRRPNI-UHFFFAOYSA-N	jm5b01461, Compound 75	3C-like proteinase (3CL-PRO)	Human SARS coronavirus		7200			10.1021/acs.jmedchem.5b01461	http://www.bindingdb.org/jsp/dbsearch/PrimarySearch_ki.jsp?energyterm=kJ/mole&tag=r21&monomerid=429257&enzyme=3C-like+proteinase+%283CL-PRO%29&column=ki&startPg=0&Increment=50&submit=Search	154732719
868601	Fc1ccc(CC2C(=O)C(=O)c3cc(I)ccc23)c(Cl)c1	IMOXDUVJGQIFEW-UHFFFAOYSA-N	jm5b01461, Compound 76	3C-like proteinase (3CL-PRO)	Human SARS coronavirus		9400			10.1021/acs.jmedchem.5b01461	http://www.bindingdb.org/jsp/dbsearch/PrimarySearch_ki.jsp?energyterm=kJ/mole&tag=r21&monomerid=429258&enzyme=3C-like+proteinase+%283CL-PRO%29&column=ki&startPg=0&Increment=50&submit=Search	154732720
868602	[O-][N+](=O)c1cccc2C(=O)C(=O)C(Cc3cc4ccccc4s3)c12	HRGTVSWPWYVMGR-UHFFFAOYSA-N	jm5b01461, Compound 77	3C-like proteinase (3CL-PRO)	Human SARS coronavirus		2000			10.1021/acs.jmedchem.5b01461	http://www.bindingdb.org/jsp/dbsearch/PrimarySearch_ki.jsp?energyterm=kJ/mole&tag=r21&monomerid=429259&enzyme=3C-like+proteinase+%283CL-PRO%29&column=ki&startPg=0&Increment=50&submit=Search	154732721
868603	Brc1cccc2C(=O)C(=O)C(Cc3cc4ccccc4s3)c12	XDCJGGHIPOQMLF-UHFFFAOYSA-N	jm5b01461, Compound 78	3C-like proteinase (3CL-PRO)	Human SARS coronavirus		980			10.1021/acs.jmedchem.5b01461	http://www.bindingdb.org/jsp/dbsearch/PrimarySearch_ki.jsp?energyterm=kJ/mole&tag=r21&monomerid=429260&enzyme=3C-like+proteinase+%283CL-PRO%29&column=ki&startPg=0&Increment=50&submit=Search	154732722
868604	Fc1ccc2C(Cc3cc4ccccc4s3)C(=O)C(=O)c2c1	ZDRDPKAXHMDOLH-UHFFFAOYSA-N	jm5b01461, Compound 79	3C-like proteinase (3CL-PRO)	Human SARS coronavirus		4820			10.1021/acs.jmedchem.5b01461	http://www.bindingdb.org/jsp/dbsearch/PrimarySearch_ki.jsp?energyterm=kJ/mole&tag=r21&monomerid=429261&enzyme=3C-like+proteinase+%283CL-PRO%29&column=ki&startPg=0&Increment=50&submit=Search	154732723
868605	Ic1ccc2C(Cc3cc4ccccc4s3)C(=O)C(=O)c2c1	CWBDSMSNJTZRSA-UHFFFAOYSA-N	jm5b01461, Compound 80	3C-like proteinase (3CL-PRO)	Human SARS coronavirus		950			10.1021/acs.jmedchem.5b01461	http://www.bindingdb.org/jsp/dbsearch/PrimarySearch_ki.jsp?energyterm=kJ/mole&tag=r21&monomerid=429262&enzyme=3C-like+proteinase+%283CL-PRO%29&column=ki&startPg=0&Increment=50&submit=Search	154732724
868606	CC1CCN(CC1)S(=O)(=O)c1ccc2C(Cc3ccccc3)C(=O)C(=O)c2c1	XMQJYRFXKWGGMV-UHFFFAOYSA-N	jm5b01461, Compound 81	3C-like proteinase (3CL-PRO)	Human SARS coronavirus		1040			10.1021/acs.jmedchem.5b01461	http://www.bindingdb.org/jsp/dbsearch/PrimarySearch_ki.jsp?energyterm=kJ/mole&tag=r21&monomerid=429263&enzyme=3C-like+proteinase+%283CL-PRO%29&column=ki&startPg=0&Increment=50&submit=Search	154732725
868607	Oc1cc(O)c2c(c1)oc(cc2=O)-c1ccc(O)c(O)c1	IQPNAANSBPBGFQ-UHFFFAOYSA-N	2-(3,4-dihydroxyphenyl)-5,7-dihydroxy-4H-chromen-4-one::2-(3,4-dihydroxyphenyl)-5,7-dihydroxy-chromen-4-one::CHEMBL151::Luteolin (27)::Luteolin (4)::cid_5280445::luteolin::med.21724, Compound 3	3C-like proteinase (3CL-PRO)	Human SARS coronavirus				10600	10.1021/acs.jmedchem.5b01461	http://www.bindingdb.org/jsp/dbsearch/PrimarySearch_ki.jsp?energyterm=kJ/mole&tag=r21&monomerid=7459&enzyme=3C-like+proteinase+%283CL-PRO%29&column=ki&startPg=0&Increment=50&submit=Search	5280445	CHEMBL151		ZINC18185774
868608	Oc1cc(O)c2c(c1)oc(-c1ccc(O)c(O)c1)c(O)c2=O	REFJWTPEDVJJIY-UHFFFAOYSA-N	2-(3,4-dihydroxyphenyl)-3,5,7-trihydroxy-4H-chromen-4-one::2-(3,4-dihydroxyphenyl)-3,5,7-trihydroxy-chromen-4-one::2-(3,4-dihydroxyphenyl)-3,5,7-trihydroxy-chromone;hydrate::CHEMBL50::Quercetin::Quercetin (10)::Quercetin (21)::Quercetin (Qur)::US9180183, Quercetin::med.21724, Compound 4	3C-like proteinase (3CL-PRO)	Human SARS coronavirus				83400	10.1021/acs.jmedchem.5b01461	http://www.bindingdb.org/jsp/dbsearch/PrimarySearch_ki.jsp?energyterm=kJ/mole&tag=r21&monomerid=7460&enzyme=3C-like+proteinase+%283CL-PRO%29&column=ki&startPg=0&Increment=50&submit=Search	5280343	CHEMBL50	DB04216	ZINC03869685
868609	OC[C@H]1O[C@@H](Oc2c(oc3cc(O)cc(O)c3c2=O)-c2ccc(O)c(O)c2)[C@H](O)[C@@H](O)[C@H]1O	OVSQVDMCBVZWGM-DTGCRPNFSA-N	jm5b01461, Compound 84	3C-like proteinase (3CL-PRO)	Human SARS coronavirus		42700			10.1021/acs.jmedchem.5b01461	http://www.bindingdb.org/jsp/dbsearch/PrimarySearch_ki.jsp?energyterm=kJ/mole&tag=r21&monomerid=429266&enzyme=3C-like+proteinase+%283CL-PRO%29&column=ki&startPg=0&Increment=50&submit=Search	5281643
868610	C[C@H]1O[C@@H](Oc2c(oc3cc(O)cc(O)c3c2=O)-c2ccc(O)c(O)c2)[C@H](O)[C@@H](O)[C@H]1O	OXGUCUVFOIWWQJ-JZGUBBPASA-N	jm5b01461, Compound 85	3C-like proteinase (3CL-PRO)	Human SARS coronavirus		24140			10.1021/acs.jmedchem.5b01461	http://www.bindingdb.org/jsp/dbsearch/PrimarySearch_ki.jsp?energyterm=kJ/mole&tag=r21&monomerid=429267&enzyme=3C-like+proteinase+%283CL-PRO%29&column=ki&startPg=0&Increment=50&submit=Search	51402819
868611	Oc1ccc(cc1)-c1cc(=O)c2c(O)cc(O)c(-c3cc(ccc3O)-c3oc4cc(O)cc(O)c4c(=O)c3O)c2o1	IJAVDQISRXBCHX-UHFFFAOYSA-N	jm5b01461, Compound 86	3C-like proteinase (3CL-PRO)	Human SARS coronavirus		8300			10.1021/acs.jmedchem.5b01461	http://www.bindingdb.org/jsp/dbsearch/PrimarySearch_ki.jsp?energyterm=kJ/mole&tag=r21&monomerid=429268&enzyme=3C-like+proteinase+%283CL-PRO%29&column=ki&startPg=0&Increment=50&submit=Search	154732726
868612	COc1ccc(cc1-c1c(O)cc(O)c2c1oc(cc2=O)-c1ccc(O)cc1)-c1oc2cc(O)cc(O)c2c(=O)c1O	HAOSUSJBFCRFET-UHFFFAOYSA-N	jm5b01461, Compound 87	3C-like proteinase (3CL-PRO)	Human SARS coronavirus		72300			10.1021/acs.jmedchem.5b01461	http://www.bindingdb.org/jsp/dbsearch/PrimarySearch_ki.jsp?energyterm=kJ/mole&tag=r21&monomerid=429269&enzyme=3C-like+proteinase+%283CL-PRO%29&column=ki&startPg=0&Increment=50&submit=Search	154732727
868613	COc1ccc(cc1)-c1cc(=O)c2c(O)cc(O)c(-c3cc(ccc3OC)-c3cc(=O)c4c(O)cc(OC)cc4o3)c2o1	YCXRBCHEOFVYEN-UHFFFAOYSA-N	jm5b01461, Compound 88	3C-like proteinase (3CL-PRO)	Human SARS coronavirus		38400			10.1021/acs.jmedchem.5b01461	http://www.bindingdb.org/jsp/dbsearch/PrimarySearch_ki.jsp?energyterm=kJ/mole&tag=r21&monomerid=429270&enzyme=3C-like+proteinase+%283CL-PRO%29&column=ki&startPg=0&Increment=50&submit=Search	5281696
868614	COc1cc(O)c2c(c1)oc(cc2=O)-c1ccc(OC)c(c1)-c1c(O)cc(O)c2c1oc(cc2=O)-c1ccc(O)cc1	AIFCFBUSLAEIBR-UHFFFAOYSA-N	jm5b01461, Compound 89	3C-like proteinase (3CL-PRO)	Human SARS coronavirus		32700			10.1021/acs.jmedchem.5b01461	http://www.bindingdb.org/jsp/dbsearch/PrimarySearch_ki.jsp?energyterm=kJ/mole&tag=r21&monomerid=429271&enzyme=3C-like+proteinase+%283CL-PRO%29&column=ki&startPg=0&Increment=50&submit=Search	5271805
868615	Oc1ccc(cc1)-c1cc(=O)c2c(O)cc(O)cc2o1	KZNIFHPLKGYRTM-UHFFFAOYSA-N	5,7-dihydroxy-2-(4-hydroxyphenyl)-4H-chromen-4-one::5,7-dihydroxy-2-(4-hydroxyphenyl)-chromen-4-one::Apigenin::Apigenin (2)::Apigenin (3)::Apigenin (7)::Apigenin, 13::CHEMBL28::Naringenin, 18::US10278929, Apigenin::cid_5280443::jm5b01461, Compound 90	3C-like proteinase (3CL-PRO)	Human SARS coronavirus		280000			10.1021/acs.jmedchem.5b01461	http://www.bindingdb.org/jsp/dbsearch/PrimarySearch_ki.jsp?energyterm=kJ/mole&tag=r21&monomerid=7458&enzyme=3C-like+proteinase+%283CL-PRO%29&column=ki&startPg=0&Increment=50&submit=Search	5280443	CHEMBL28	DB07352	ZINC03871576
868616	CC(C)c1cc2CCC3C(C)(C)CCCC3(C)c2cc1O	QXNWVJOHUAQHLM-UHFFFAOYSA-N	jm5b01461, Compound 91	3C-like proteinase (3CL-PRO)	Human SARS coronavirus		49600			10.1021/acs.jmedchem.5b01461	http://www.bindingdb.org/jsp/dbsearch/PrimarySearch_ki.jsp?energyterm=kJ/mole&tag=r21&monomerid=429273&enzyme=3C-like+proteinase+%283CL-PRO%29&column=ki&startPg=0&Increment=50&submit=Search	521330
868617	CC(C)c1cc2CCC3[C@@](C)(CCC[C@@]3(C)c2cc1O)C=O	BYISLTMARMJFNI-YPJRHXLCSA-N	jm5b01461, Compound 92	3C-like proteinase (3CL-PRO)	Human SARS coronavirus		163200			10.1021/acs.jmedchem.5b01461	http://www.bindingdb.org/jsp/dbsearch/PrimarySearch_ki.jsp?energyterm=kJ/mole&tag=r21&monomerid=429274&enzyme=3C-like+proteinase+%283CL-PRO%29&column=ki&startPg=0&Increment=50&submit=Search	154732728
868618	CC(C)c1cc2CCC3[C@](C)(CO)CCC[C@@]3(C)c2cc1O	ZSMYLYMVTJVQIR-YPJRHXLCSA-N	jm5b01461, Compound 93	3C-like proteinase (3CL-PRO)	Human SARS coronavirus		128900			10.1021/acs.jmedchem.5b01461	http://www.bindingdb.org/jsp/dbsearch/PrimarySearch_ki.jsp?energyterm=kJ/mole&tag=r21&monomerid=429275&enzyme=3C-like+proteinase+%283CL-PRO%29&column=ki&startPg=0&Increment=50&submit=Search	154732729
868619	CC1=CC[C@]2(C)CC[C@]3(C)C4=CC=C5C(C)=C(O)C(=O)C=C5[C@]4(C)CC[C@@]3(C)C2C1	FLMDVQMCMIGPEK-VAPXRUTMSA-N	jm5b01461, Compound 94	3C-like proteinase (3CL-PRO)	Human SARS coronavirus		2600			10.1021/acs.jmedchem.5b01461	http://www.bindingdb.org/jsp/dbsearch/PrimarySearch_ki.jsp?energyterm=kJ/mole&tag=r21&monomerid=429276&enzyme=3C-like+proteinase+%283CL-PRO%29&column=ki&startPg=0&Increment=50&submit=Search	154732730
868620	COC(=O)C1(C)CCC2(C)CCC3(C)C4=CC=C5C(C)=C(O)C(=O)C=C5C4(C)CCC3(C)C2C1	JFACETXYABVHFD-UHFFFAOYSA-N	jm5b01461, Compound 95	3C-like proteinase (3CL-PRO)	Human SARS coronavirus		9900			10.1021/acs.jmedchem.5b01461	http://www.bindingdb.org/jsp/dbsearch/PrimarySearch_ki.jsp?energyterm=kJ/mole&tag=r21&monomerid=429277&enzyme=3C-like+proteinase+%283CL-PRO%29&column=ki&startPg=0&Increment=50&submit=Search	264268
868621	COC(=O)[C@]1(C)CC[C@]2(C)CC[C@]3(C)C4=CC=C5C(C)=C(O)C(=O)C=C5[C@]4(C)CC[C@@]3(C)C2C1	JFACETXYABVHFD-RKHSXEAASA-N	CHEMBL4207055::med.21724, Compound 142	3C-like proteinase (3CL-PRO)	Human SARS coronavirus		5500			10.1021/acs.jmedchem.5b01461	http://www.bindingdb.org/jsp/dbsearch/PrimarySearch_ki.jsp?energyterm=kJ/mole&tag=r21&monomerid=50450775&enzyme=3C-like+proteinase+%283CL-PRO%29&column=ki&startPg=0&Increment=50&submit=Search	10004662
868622	CC1=C(O)C(=O)C=C2C1=CC=C1[C@@]2(C)CC[C@@]2(C)C3C[C@@](C)(CC[C@]3(C)CC[C@]12C)C(O)=O	KQJSQWZMSAGSHN-AQCDROMSSA-N	jm5b01461, Compound 97	3C-like proteinase (3CL-PRO)	Human SARS coronavirus		10300			10.1021/acs.jmedchem.5b01461	http://www.bindingdb.org/jsp/dbsearch/PrimarySearch_ki.jsp?energyterm=kJ/mole&tag=r21&monomerid=429279&enzyme=3C-like+proteinase+%283CL-PRO%29&column=ki&startPg=0&Increment=50&submit=Search	12302620
868623	CC1=C(O)C(O)C=C2C1=CC=C1[C@@]2(C)CC[C@@]2(C)C3C[C@@](C)(CC[C@]3(C)CC[C@]12C)C(O)=O	SLLOAFOXLXWLPA-WNGNNJIVSA-N	jm5b01461, Compound 98	3C-like proteinase (3CL-PRO)	Human SARS coronavirus		21700			10.1021/acs.jmedchem.5b01461	http://www.bindingdb.org/jsp/dbsearch/PrimarySearch_ki.jsp?energyterm=kJ/mole&tag=r21&monomerid=429280&enzyme=3C-like+proteinase+%283CL-PRO%29&column=ki&startPg=0&Increment=50&submit=Search	154732731
868624	CC(=C)[C@@H]1CC[C@@]2(CC[C@]3(C)C(CCC4[C@@]5(C)CCC(O)C(C)(C)C5CC[C@@]34C)C12)C(O)=O	QGJZLNKBHJESQX-MXNOVBPMSA-N	jm5b01461, Compound 99	3C-like proteinase (3CL-PRO)	Human SARS coronavirus		10000			10.1021/acs.jmedchem.5b01461	http://www.bindingdb.org/jsp/dbsearch/PrimarySearch_ki.jsp?energyterm=kJ/mole&tag=r21&monomerid=429281&enzyme=3C-like+proteinase+%283CL-PRO%29&column=ki&startPg=0&Increment=50&submit=Search	44337811
868625	O=C1OC[C@H](Cc2ccc3OCOc3c2)C1Cc1ccc2OCOc2c1	DDWGQGZPYDSYEL-MLCCFXAWSA-N	jm5b01461, Compound 100	3C-like proteinase (3CL-PRO)	Human SARS coronavirus		25000			10.1021/acs.jmedchem.5b01461	http://www.bindingdb.org/jsp/dbsearch/PrimarySearch_ki.jsp?energyterm=kJ/mole&tag=r21&monomerid=429282&enzyme=3C-like+proteinase+%283CL-PRO%29&column=ki&startPg=0&Increment=50&submit=Search	154732732
868626	Cc1cc(c(Cl)cc1Cl)S(=O)(=O)c1c(cc(cc1[N+]([O-])=O)C(F)(F)F)[N+]([O-])=O	INAZPZCJNPPHGV-UHFFFAOYSA-N	1,5-dichloro-2-{[2,6-dinitro-4-(trifluoromethyl)benzene]sulfonyl}-4-methylbenzene::Compound 1 analog 3::med.21724, Compound 147	3C-like proteinase (3CL-PRO)	Human SARS coronavirus		300			10.1021/acs.jmedchem.5b01461	http://www.bindingdb.org/jsp/dbsearch/PrimarySearch_ki.jsp?energyterm=kJ/mole&tag=r21&monomerid=11292&enzyme=3C-like+proteinase+%283CL-PRO%29&column=ki&startPg=0&Increment=50&submit=Search	2799606		DB07620	ZINC08626709
868627	FC(F)(F)c1nnc(SC(=O)c2ccc(o2)C#Cc2ccccc2)[nH]1	VNGWUVBXUIDQTK-UHFFFAOYSA-N	Compound 2 analog 15::MurB inhibitor (compound 16)::[5-(2-phenylethynyl)furan-2-yl]({[5-(trifluoromethyl)-4H-1,2,4-triazol-3-yl]sulfanyl})methanone::med.21724, Compound 148	3C-like proteinase (3CL-PRO)	Human SARS coronavirus		3000			10.1021/acs.jmedchem.5b01461	http://www.bindingdb.org/jsp/dbsearch/PrimarySearch_ki.jsp?energyterm=kJ/mole&tag=r21&monomerid=11304&enzyme=3C-like+proteinase+%283CL-PRO%29&column=ki&startPg=0&Increment=50&submit=Search	2822496		DB07743	ZINC01039846
868628	Clc1cc(Cl)cc(NC(=O)CSc2nccc(n2)-c2csc(n2)-c2ccccc2)c1	LILOEJREEQFTPM-UHFFFAOYSA-N	N-(3,5-dichlorophenyl)-2-{[4-(2-phenyl-1,3-thiazol-4-yl)pyrimidin-2-yl]sulfanyl}acetamide::jm5b01461, Compound 105::pyrimidine-containing compound 1	3C-like proteinase (3CL-PRO)	Human SARS coronavirus		3000			10.1021/acs.jmedchem.5b01461	http://www.bindingdb.org/jsp/dbsearch/PrimarySearch_ki.jsp?energyterm=kJ/mole&tag=r21&monomerid=11264&enzyme=3C-like+proteinase+%283CL-PRO%29&column=ki&startPg=0&Increment=50&submit=Search	2744814			ZINC01047806
868629	Cn1nc(cc1C(F)(F)F)-c1ccc(s1)-c1ccnc(SCC(=O)Nc2ccc(Cl)cc2)n1	AWQBIBTZJKFLEW-UHFFFAOYSA-N	N-(4-chlorophenyl)-2-[(4-{5-[1-methyl-5-(trifluoromethyl)-1H-pyrazol-3-yl]thiophen-2-yl}pyrimidin-2-yl)sulfanyl]acetamide::jm5b01461, Compound 106::pyrimidine-containing compound 2	3C-like proteinase (3CL-PRO)	Human SARS coronavirus		10000			10.1021/acs.jmedchem.5b01461	http://www.bindingdb.org/jsp/dbsearch/PrimarySearch_ki.jsp?energyterm=kJ/mole&tag=r21&monomerid=11265&enzyme=3C-like+proteinase+%283CL-PRO%29&column=ki&startPg=0&Increment=50&submit=Search	2821293			ZINC01038692
868630	CSC1=C(C(C)C(S1)c1nc(C)cs1)c1ccnc(SCC(=O)Nc2ccc(Cl)cc2)n1	GMFYISSQLAVPOF-UHFFFAOYSA-N	jm5b01461, Compound 107	3C-like proteinase (3CL-PRO)	Human SARS coronavirus		11000			10.1021/acs.jmedchem.5b01461	http://www.bindingdb.org/jsp/dbsearch/PrimarySearch_ki.jsp?energyterm=kJ/mole&tag=r21&monomerid=429287&enzyme=3C-like+proteinase+%283CL-PRO%29&column=ki&startPg=0&Increment=50&submit=Search	154732733
868631	CSC1=C(C(C)C(S1)c1nc(C)cs1)c1ccnc(SCC(=O)Nc2ccccc2Cl)n1	BZKVWSWLQTWMJZ-UHFFFAOYSA-N	jm5b01461, Compound 108	3C-like proteinase (3CL-PRO)	Human SARS coronavirus		12000			10.1021/acs.jmedchem.5b01461	http://www.bindingdb.org/jsp/dbsearch/PrimarySearch_ki.jsp?energyterm=kJ/mole&tag=r21&monomerid=429288&enzyme=3C-like+proteinase+%283CL-PRO%29&column=ki&startPg=0&Increment=50&submit=Search	154732734
868632	Cc1nc(cs1)-c1nc(cs1)-c1ccnc(SCC(=O)Nc2ccc(Cl)cc2)n1	JEZYTEDGOJCVQS-UHFFFAOYSA-N	N-(4-chlorophenyl)-2-({4-[2-(2-methyl-1,3-thiazol-4-yl)-1,3-thiazol-4-yl]pyrimidin-2-yl}sulfanyl)acetamide::jm5b01461, Compound 109::pyrimidine-containing compound 5	3C-like proteinase (3CL-PRO)	Human SARS coronavirus		14000			10.1021/acs.jmedchem.5b01461	http://www.bindingdb.org/jsp/dbsearch/PrimarySearch_ki.jsp?energyterm=kJ/mole&tag=r21&monomerid=11268&enzyme=3C-like+proteinase+%283CL-PRO%29&column=ki&startPg=0&Increment=50&submit=Search	2744846			ZINC02153371
868633	Clc1ccc(NC(=O)CSc2nccc(n2)-c2cc(no2)-c2ccccc2)cc1	TUBDEXWKZSAMKH-UHFFFAOYSA-N	N-(4-chlorophenyl)-2-{[4-(3-phenyl-1,2-oxazol-5-yl)pyrimidin-2-yl]sulfanyl}acetamide::jm5b01461, Compound 110::pyrimidine-containing compound 6	3C-like proteinase (3CL-PRO)	Human SARS coronavirus		15000			10.1021/acs.jmedchem.5b01461	http://www.bindingdb.org/jsp/dbsearch/PrimarySearch_ki.jsp?energyterm=kJ/mole&tag=r21&monomerid=11269&enzyme=3C-like+proteinase+%283CL-PRO%29&column=ki&startPg=0&Increment=50&submit=Search	2745617			ZINC01031719
868634	Nc1ccccc1C(=O)On1nnc2ccccc12	JPKNQONFNZKKLX-UHFFFAOYSA-N	Benzotriazole ester, 3::med.21724, Compound 88	3C-like proteinase (3CL-PRO)	Human SARS coronavirus	20				10.1021/acs.jmedchem.5b01461	http://www.bindingdb.org/jsp/dbsearch/PrimarySearch_ki.jsp?energyterm=kJ/mole&tag=r21&monomerid=59237&enzyme=3C-like+proteinase+%283CL-PRO%29&column=ki&startPg=0&Increment=50&submit=Search	15959235			ZINC59426271
868635	CN(C)c1ccc(cc1)C(=O)C(=O)On1nnc2ccccc12	MGNVHIOYMRJHJM-UHFFFAOYSA-N	jm5b01461, Compound 112	3C-like proteinase (3CL-PRO)	Human SARS coronavirus	17				10.1021/acs.jmedchem.5b01461	http://www.bindingdb.org/jsp/dbsearch/PrimarySearch_ki.jsp?energyterm=kJ/mole&tag=r21&monomerid=429292&enzyme=3C-like+proteinase+%283CL-PRO%29&column=ki&startPg=0&Increment=50&submit=Search	154732735
868636	CNc1ccc(cc1)C(=O)C(=O)On1nnc2ccccc12	QWYJOGUTBXAJPJ-UHFFFAOYSA-N	jm5b01461, Compound 113	3C-like proteinase (3CL-PRO)	Human SARS coronavirus	12				10.1021/acs.jmedchem.5b01461	http://www.bindingdb.org/jsp/dbsearch/PrimarySearch_ki.jsp?energyterm=kJ/mole&tag=r21&monomerid=429293&enzyme=3C-like+proteinase+%283CL-PRO%29&column=ki&startPg=0&Increment=50&submit=Search	154732736
868637	CCN(CC)c1ccc(cc1)C(=O)C(=O)On1nnc2ccccc12	MYDQNDIWEWIRQF-UHFFFAOYSA-N	jm5b01461, Compound 114	3C-like proteinase (3CL-PRO)	Human SARS coronavirus	11				10.1021/acs.jmedchem.5b01461	http://www.bindingdb.org/jsp/dbsearch/PrimarySearch_ki.jsp?energyterm=kJ/mole&tag=r21&monomerid=429294&enzyme=3C-like+proteinase+%283CL-PRO%29&column=ki&startPg=0&Increment=50&submit=Search	154732737
868638	O=C(On1nnc2ccccc12)C(=O)c1ccc2[nH]cnc2c1	VOGMLEILTKJNRW-UHFFFAOYSA-N	jm5b01461, Compound 115	3C-like proteinase (3CL-PRO)	Human SARS coronavirus	23				10.1021/acs.jmedchem.5b01461	http://www.bindingdb.org/jsp/dbsearch/PrimarySearch_ki.jsp?energyterm=kJ/mole&tag=r21&monomerid=429295&enzyme=3C-like+proteinase+%283CL-PRO%29&column=ki&startPg=0&Increment=50&submit=Search	154732738
868639	O=C(On1nnc2ccccc12)C(=O)c1ccc2[nH]ccc2c1	VMJNRZSRLJQJBY-UHFFFAOYSA-N	jm5b01461, Compound 116	3C-like proteinase (3CL-PRO)	Human SARS coronavirus	7.50				10.1021/acs.jmedchem.5b01461	http://www.bindingdb.org/jsp/dbsearch/PrimarySearch_ki.jsp?energyterm=kJ/mole&tag=r21&monomerid=429296&enzyme=3C-like+proteinase+%283CL-PRO%29&column=ki&startPg=0&Increment=50&submit=Search	154732739
868640	O=C(On1nnc2ccccc12)C(=O)c1cc2ccccc2[nH]1	FHRKBPHIHXUQSY-UHFFFAOYSA-N	jm5b01461, Compound 117	3C-like proteinase (3CL-PRO)	Human SARS coronavirus	12				10.1021/acs.jmedchem.5b01461	http://www.bindingdb.org/jsp/dbsearch/PrimarySearch_ki.jsp?energyterm=kJ/mole&tag=r21&monomerid=429297&enzyme=3C-like+proteinase+%283CL-PRO%29&column=ki&startPg=0&Increment=50&submit=Search	154732740
868641	Fc1ccc2cc([nH]c2c1)C(=O)C(=O)On1nnc2ccccc12	IBOOFFOPCKBWBT-UHFFFAOYSA-N	jm5b01461, Compound 118	3C-like proteinase (3CL-PRO)	Human SARS coronavirus		14			10.1021/acs.jmedchem.5b01461	http://www.bindingdb.org/jsp/dbsearch/PrimarySearch_ki.jsp?energyterm=kJ/mole&tag=r21&monomerid=429298&enzyme=3C-like+proteinase+%283CL-PRO%29&column=ki&startPg=0&Increment=50&submit=Search	154732741
868642	Clc1cncc(OC(=O)c2cccs2)c1	PAVJYVVZIJTAHT-UHFFFAOYSA-N	jm5b01461, Compound 119	3C-like proteinase (3CL-PRO)	Human SARS coronavirus		500			10.1021/acs.jmedchem.5b01461	http://www.bindingdb.org/jsp/dbsearch/PrimarySearch_ki.jsp?energyterm=kJ/mole&tag=r21&monomerid=429299&enzyme=3C-like+proteinase+%283CL-PRO%29&column=ki&startPg=0&Increment=50&submit=Search	2800278
868643	Clc1cncc(OC(=O)c2ccco2)c1	DWJOEJDGHVXXEB-UHFFFAOYSA-N	(5-chloranylpyridin-3-yl) furan-2-carboxylate::(5-chloropyridin-3-yl) furan-2-carboxylate::2-furancarboxylic acid (5-chloro-3-pyridinyl) ester::5-chloro-3-pyridinyl 2-furoate::CHEMBL222840::MLS000594516::SMR000114552::cid_7230550::furan-2-carboxylic acid (5-chloro-3-pyridyl) ester::med.21724, Compound 93	3C-like proteinase (3CL-PRO)	Human SARS coronavirus		60			10.1021/acs.jmedchem.5b01461	http://www.bindingdb.org/jsp/dbsearch/PrimarySearch_ki.jsp?energyterm=kJ/mole&tag=r21&monomerid=32805&enzyme=3C-like+proteinase+%283CL-PRO%29&column=ki&startPg=0&Increment=50&submit=Search	7230550	CHEMBL222840		ZINC04419293
868644	Brc1cncc(OC(=O)c2ccco2)c1	HMICIXHTRIFAET-UHFFFAOYSA-N	5-bromo-pyridin-3-yl furan-2-carboxylate::5-bromopyridin-3-yl furan-2-carboxylate::CHEMBL222234::jm5b01461, Compound 121	3C-like proteinase (3CL-PRO)	Human SARS coronavirus		50			10.1021/acs.jmedchem.5b01461	http://www.bindingdb.org/jsp/dbsearch/PrimarySearch_ki.jsp?energyterm=kJ/mole&tag=r21&monomerid=50208940&enzyme=3C-like+proteinase+%283CL-PRO%29&column=ki&startPg=0&Increment=50&submit=Search	16203681	CHEMBL222234		ZINC40584836
868645	Clc1cncc(OC(=O)c2cc3ccccc3[nH]2)c1	LJTINUKMKJKLBT-UHFFFAOYSA-N	5-chloro-pyridin-3-yl-1H-indole-2-carboxylate::5-chloropyridin-3-yl 1H-indole-2-carboxylate::CHEMBL225515::med.21724, Compound 94	3C-like proteinase (3CL-PRO)	Human SARS coronavirus		65			10.1021/acs.jmedchem.5b01461	http://www.bindingdb.org/jsp/dbsearch/PrimarySearch_ki.jsp?energyterm=kJ/mole&tag=r21&monomerid=50208939&enzyme=3C-like+proteinase+%283CL-PRO%29&column=ki&startPg=0&Increment=50&submit=Search	16204322	CHEMBL225515		ZINC40585265
868646	Clc1ccc(cc1)-c1ccc(o1)C(=O)Oc1cncc(Cl)c1	UICFGOSRHHZBHZ-UHFFFAOYSA-N	5-chloropyridin-3-yl 5-(4-chlorophenyl)furan-2-carboxylate::5-chloropyridin-3-yl-5-(4-chlorophenyl)furan-2-carboxylate::CHEMBL222769::med.21724, Compound 95	3C-like proteinase (3CL-PRO)	Human SARS coronavirus		63			10.1021/acs.jmedchem.5b01461	http://www.bindingdb.org/jsp/dbsearch/PrimarySearch_ki.jsp?energyterm=kJ/mole&tag=r21&monomerid=50208942&enzyme=3C-like+proteinase+%283CL-PRO%29&column=ki&startPg=0&Increment=50&submit=Search	16203797	CHEMBL222769		ZINC40585026
868647	O=C(On1nnc2ccccc12)C(=O)c1ccc2[nH]ccc2c1	VMJNRZSRLJQJBY-UHFFFAOYSA-N	jm5b01461, Compound 116	3C-like proteinase (3CL-PRO)	Human SARS coronavirus		200			10.1021/acs.jmedchem.5b01461	http://www.bindingdb.org/jsp/dbsearch/PrimarySearch_ki.jsp?energyterm=kJ/mole&tag=r21&monomerid=429296&enzyme=3C-like+proteinase+%283CL-PRO%29&column=ki&startPg=0&Increment=50&submit=Search	154732739
868648	Clc1cncc(OC(=O)c2cccs2)c1	PAVJYVVZIJTAHT-UHFFFAOYSA-N	jm5b01461, Compound 119	3C-like proteinase (3CL-PRO)	Human SARS coronavirus		500			10.1021/acs.jmedchem.5b01461	http://www.bindingdb.org/jsp/dbsearch/PrimarySearch_ki.jsp?energyterm=kJ/mole&tag=r21&monomerid=429299&enzyme=3C-like+proteinase+%283CL-PRO%29&column=ki&startPg=0&Increment=50&submit=Search	2800278
868649	Clc1cncc(OC(=O)c2cccc3[nH]ccc23)c1	BOSZJNSICHFHMA-UHFFFAOYSA-N	jm5b01461, Compound 124	3C-like proteinase (3CL-PRO)	Human SARS coronavirus		30			10.1021/acs.jmedchem.5b01461	http://www.bindingdb.org/jsp/dbsearch/PrimarySearch_ki.jsp?energyterm=kJ/mole&tag=r21&monomerid=429304&enzyme=3C-like+proteinase+%283CL-PRO%29&column=ki&startPg=0&Increment=50&submit=Search	25110701
868650	Clc1cncc(OC(=O)c2cccc3[nH]ccc23)c1	BOSZJNSICHFHMA-UHFFFAOYSA-N	jm5b01461, Compound 124	3C-like proteinase (3CL-PRO)	Human SARS coronavirus				6900	10.1021/acs.jmedchem.5b01461	http://www.bindingdb.org/jsp/dbsearch/PrimarySearch_ki.jsp?energyterm=kJ/mole&tag=r21&monomerid=429304&enzyme=3C-like+proteinase+%283CL-PRO%29&column=ki&startPg=0&Increment=50&submit=Search	25110701
868651	CC(=O)n1ccc2c(cccc12)C(=O)Oc1cncc(Cl)c1	ADZDQOZVSUYRGT-UHFFFAOYSA-N	jm5b01461, Compound 125	3C-like proteinase (3CL-PRO)	Human SARS coronavirus		>1000			10.1021/acs.jmedchem.5b01461	http://www.bindingdb.org/jsp/dbsearch/PrimarySearch_ki.jsp?energyterm=kJ/mole&tag=r21&monomerid=429305&enzyme=3C-like+proteinase+%283CL-PRO%29&column=ki&startPg=0&Increment=50&submit=Search	44580151
868652	Clc1cncc(OC(=O)c2ccc3[nH]ccc3c2)c1	TYLOEMFGLQBHPE-UHFFFAOYSA-N	jm5b01461, Compound 126	3C-like proteinase (3CL-PRO)	Human SARS coronavirus		310			10.1021/acs.jmedchem.5b01461	http://www.bindingdb.org/jsp/dbsearch/PrimarySearch_ki.jsp?energyterm=kJ/mole&tag=r21&monomerid=429306&enzyme=3C-like+proteinase+%283CL-PRO%29&column=ki&startPg=0&Increment=50&submit=Search	16204004
868653	Clc1cncc(OC(=O)c2ccc3[nH]ccc3c2)c1	TYLOEMFGLQBHPE-UHFFFAOYSA-N	jm5b01461, Compound 126	3C-like proteinase (3CL-PRO)	Human SARS coronavirus				24000	10.1021/acs.jmedchem.5b01461	http://www.bindingdb.org/jsp/dbsearch/PrimarySearch_ki.jsp?energyterm=kJ/mole&tag=r21&monomerid=429306&enzyme=3C-like+proteinase+%283CL-PRO%29&column=ki&startPg=0&Increment=50&submit=Search	16204004
868654	Clc1ccnc(OC(=O)c2ccc3cc[nH]c3c2)c1	FFBGIJBRBAEHCU-UHFFFAOYSA-N	jm5b01461, Compound 127	3C-like proteinase (3CL-PRO)	Human SARS coronavirus		230			10.1021/acs.jmedchem.5b01461	http://www.bindingdb.org/jsp/dbsearch/PrimarySearch_ki.jsp?energyterm=kJ/mole&tag=r21&monomerid=429307&enzyme=3C-like+proteinase+%283CL-PRO%29&column=ki&startPg=0&Increment=50&submit=Search	154732743
868655	Clc1ccnc(OC(=O)c2ccc3cc[nH]c3c2)c1	FFBGIJBRBAEHCU-UHFFFAOYSA-N	jm5b01461, Compound 127	3C-like proteinase (3CL-PRO)	Human SARS coronavirus				>25000	10.1021/acs.jmedchem.5b01461	http://www.bindingdb.org/jsp/dbsearch/PrimarySearch_ki.jsp?energyterm=kJ/mole&tag=r21&monomerid=429307&enzyme=3C-like+proteinase+%283CL-PRO%29&column=ki&startPg=0&Increment=50&submit=Search	154732743
868656	Clc1ccnc(OC(=O)c2cccc3cc[nH]c23)c1	WVEQLJRIAHWINP-UHFFFAOYSA-N	jm5b01461, Compound 128	3C-like proteinase (3CL-PRO)	Human SARS coronavirus		80			10.1021/acs.jmedchem.5b01461	http://www.bindingdb.org/jsp/dbsearch/PrimarySearch_ki.jsp?energyterm=kJ/mole&tag=r21&monomerid=429308&enzyme=3C-like+proteinase+%283CL-PRO%29&column=ki&startPg=0&Increment=50&submit=Search	154732744
868657	Clc1ccnc(OC(=O)c2cccc3cc[nH]c23)c1	WVEQLJRIAHWINP-UHFFFAOYSA-N	jm5b01461, Compound 128	3C-like proteinase (3CL-PRO)	Human SARS coronavirus				12100	10.1021/acs.jmedchem.5b01461	http://www.bindingdb.org/jsp/dbsearch/PrimarySearch_ki.jsp?energyterm=kJ/mole&tag=r21&monomerid=429308&enzyme=3C-like+proteinase+%283CL-PRO%29&column=ki&startPg=0&Increment=50&submit=Search	154732744
868658	Clc1ccc(cc1)-c1ccc(o1)C(=O)Cc1cc(Br)ccn1	XWSZQNISQRMQMD-UHFFFAOYSA-N	jm5b01461, Compound 129	3C-like proteinase (3CL-PRO)	Human SARS coronavirus		13000			10.1021/acs.jmedchem.5b01461	http://www.bindingdb.org/jsp/dbsearch/PrimarySearch_ki.jsp?energyterm=kJ/mole&tag=r21&monomerid=429309&enzyme=3C-like+proteinase+%283CL-PRO%29&column=ki&startPg=0&Increment=50&submit=Search	154732745
868659	Clc1ccc(cc1)-c1ncc(o1)C(=O)Cc1cc(Br)ccn1	OIEDLSWMGFBWQE-UHFFFAOYSA-N	jm5b01461, Compound 130	3C-like proteinase (3CL-PRO)	Human SARS coronavirus		75000			10.1021/acs.jmedchem.5b01461	http://www.bindingdb.org/jsp/dbsearch/PrimarySearch_ki.jsp?energyterm=kJ/mole&tag=r21&monomerid=429310&enzyme=3C-like+proteinase+%283CL-PRO%29&column=ki&startPg=0&Increment=50&submit=Search	154732746
868660	FC(C(=O)c1cnc(o1)-c1ccc(Cl)cc1)c1cc(Br)ccn1	NKQRTFGXSLCBMM-UHFFFAOYSA-N	jm5b01461, Compound 131	3C-like proteinase (3CL-PRO)	Human SARS coronavirus		28000			10.1021/acs.jmedchem.5b01461	http://www.bindingdb.org/jsp/dbsearch/PrimarySearch_ki.jsp?energyterm=kJ/mole&tag=r21&monomerid=429311&enzyme=3C-like+proteinase+%283CL-PRO%29&column=ki&startPg=0&Increment=50&submit=Search	154732747
868661	FC(F)(C(=O)c1cnc(o1)-c1ccc(Cl)cc1)c1cc(Br)ccn1	UPTNMYDLVRGZLF-UHFFFAOYSA-N	jm5b01461, Compound 132	3C-like proteinase (3CL-PRO)	Human SARS coronavirus		57000			10.1021/acs.jmedchem.5b01461	http://www.bindingdb.org/jsp/dbsearch/PrimarySearch_ki.jsp?energyterm=kJ/mole&tag=r21&monomerid=429312&enzyme=3C-like+proteinase+%283CL-PRO%29&column=ki&startPg=0&Increment=50&submit=Search	154732748
868662	OC(=O)c1cc(Br)ccc1-c1ccc(\C=C2\C(=O)NN(C2=O)c2ccc(Cl)c(Cl)c2)o1	BCBVPTZIDSXEEJ-DHDCSXOGSA-N	CHEMBL376902::med.21724, Compound 110	3C-like proteinase (3CL-PRO)	Human SARS coronavirus		9190			10.1021/acs.jmedchem.5b01461	http://www.bindingdb.org/jsp/dbsearch/PrimarySearch_ki.jsp?energyterm=kJ/mole&tag=r21&monomerid=50370961&enzyme=3C-like+proteinase+%283CL-PRO%29&column=ki&startPg=0&Increment=50&submit=Search	1797640	CHEMBL376902		ZINC28640771
868663	Clc1ccc(cc1)-c1c(c(nn1-c1ccc(Cl)c(Cl)c1)-c1ccc(Br)cc1)-n1ccnc1	KXIOGQRSFMIHRF-UHFFFAOYSA-N	jm5b01461, Compound 134	3C-like proteinase (3CL-PRO)	Human SARS coronavirus		2500			10.1021/acs.jmedchem.5b01461	http://www.bindingdb.org/jsp/dbsearch/PrimarySearch_ki.jsp?energyterm=kJ/mole&tag=r21&monomerid=429314&enzyme=3C-like+proteinase+%283CL-PRO%29&column=ki&startPg=0&Increment=50&submit=Search	154732750
868664	OC(=O)c1ccc(\C=C2\C(NN(C2=O)c2ccc(cc2)C#N)c2ccccc2)cc1	HAAFCLXJXGIIDT-STZFKDTASA-N	jm5b01461, Compound 135	3C-like proteinase (3CL-PRO)	Human SARS coronavirus		5500			10.1021/acs.jmedchem.5b01461	http://www.bindingdb.org/jsp/dbsearch/PrimarySearch_ki.jsp?energyterm=kJ/mole&tag=r21&monomerid=429315&enzyme=3C-like+proteinase+%283CL-PRO%29&column=ki&startPg=0&Increment=50&submit=Search	154732751
868665	OC(=O)c1ccc(\C=C2\C(NN(C2=O)c2ccc(F)cc2)c2ccccc2)cc1	VUQGSOMUWPRSBM-ZHZULCJRSA-N	jm5b01461, Compound 136	3C-like proteinase (3CL-PRO)	Human SARS coronavirus		6800			10.1021/acs.jmedchem.5b01461	http://www.bindingdb.org/jsp/dbsearch/PrimarySearch_ki.jsp?energyterm=kJ/mole&tag=r21&monomerid=429316&enzyme=3C-like+proteinase+%283CL-PRO%29&column=ki&startPg=0&Increment=50&submit=Search	154732752
868666	OC(=O)c1ccc(\C=C2\C(NN(C2=O)c2ccc(cc2)[N+]([O-])=O)c2ccccc2)cc1	XCVLMMDZZIPDBC-ZHZULCJRSA-N	jm5b01461, Compound 137	3C-like proteinase (3CL-PRO)	Human SARS coronavirus		8400			10.1021/acs.jmedchem.5b01461	http://www.bindingdb.org/jsp/dbsearch/PrimarySearch_ki.jsp?energyterm=kJ/mole&tag=r21&monomerid=429317&enzyme=3C-like+proteinase+%283CL-PRO%29&column=ki&startPg=0&Increment=50&submit=Search	154732753
868667	[O-][N+](=O)c1cccc(c1)-c1nc(SCc2ccccc2)[nH]c(=O)c1C#N	QJKXZAGZYQHQLA-UHFFFAOYSA-N	jm5b01461, Compound 138	3C-like proteinase (3CL-PRO)	Human SARS coronavirus		>50000			10.1021/acs.jmedchem.5b01461	http://www.bindingdb.org/jsp/dbsearch/PrimarySearch_ki.jsp?energyterm=kJ/mole&tag=r21&monomerid=429318&enzyme=3C-like+proteinase+%283CL-PRO%29&column=ki&startPg=0&Increment=50&submit=Search	154732754
868668	[O-][N+](=O)c1ccc(CSc2nc(-c3cccc(c3)[N+]([O-])=O)c(C#N)c(=O)[nH]2)cc1	FIGLDDCNCCAMJG-UHFFFAOYSA-N	jm5b01461, Compound 139	3C-like proteinase (3CL-PRO)	Human SARS coronavirus		10600			10.1021/acs.jmedchem.5b01461	http://www.bindingdb.org/jsp/dbsearch/PrimarySearch_ki.jsp?energyterm=kJ/mole&tag=r21&monomerid=429319&enzyme=3C-like+proteinase+%283CL-PRO%29&column=ki&startPg=0&Increment=50&submit=Search	154732755
868669	[O-][N+](=O)c1ccc(CSc2nc(-c3ccc(Cl)cc3)c(C#N)c(=O)[nH]2)cc1	WLKIAUCQKBNLKE-UHFFFAOYSA-N	jm5b01461, Compound 140	3C-like proteinase (3CL-PRO)	Human SARS coronavirus		6100			10.1021/acs.jmedchem.5b01461	http://www.bindingdb.org/jsp/dbsearch/PrimarySearch_ki.jsp?energyterm=kJ/mole&tag=r21&monomerid=429320&enzyme=3C-like+proteinase+%283CL-PRO%29&column=ki&startPg=0&Increment=50&submit=Search	154732756
868670	O=CC(Cc1c[nH]cn1)NC[C@@H]1C[C@H]2CCCC[C@H]2CN1C(=O)c1ccc(cc1)-c1ccccc1	VZCULZJNALRGNB-FUHHYSGESA-N	jm5b01461, Compound 141.1	3C-like proteinase (3CL-PRO)	Human SARS coronavirus		108000			10.1021/acs.jmedchem.5b01461	http://www.bindingdb.org/jsp/dbsearch/PrimarySearch_ki.jsp?energyterm=kJ/mole&tag=r21&monomerid=429321&enzyme=3C-like+proteinase+%283CL-PRO%29&column=ki&startPg=0&Increment=50&submit=Search	154732757
868671	O=CC(Cc1c[nH]cn1)NC[C@H]1C[C@@H]2CCCC[C@@H]2CN1C(=O)c1ccc(cc1)-c1ccccc1	VZCULZJNALRGNB-QZIWBGCMSA-N	jm5b01461, Compound 141.2	3C-like proteinase (3CL-PRO)	Human SARS coronavirus		240000			10.1021/acs.jmedchem.5b01461	http://www.bindingdb.org/jsp/dbsearch/PrimarySearch_ki.jsp?energyterm=kJ/mole&tag=r21&monomerid=429322&enzyme=3C-like+proteinase+%283CL-PRO%29&column=ki&startPg=0&Increment=50&submit=Search	154732758
868672	O=CC(Cc1c[nH]cn1)NCC1CC2CCCCC2CN1C(=O)c1ccccc1		jm5b01461, Compound 142	3C-like proteinase (3CL-PRO)	Human SARS coronavirus		68000			10.1021/acs.jmedchem.5b01461	http://www.bindingdb.org/jsp/dbsearch/PrimarySearch_ki.jsp?energyterm=kJ/mole&tag=r21&monomerid=429323&enzyme=3C-like+proteinase+%283CL-PRO%29&column=ki&startPg=0&Increment=50&submit=Search	154732759
868673	Brc1ccc(cc1)C(=O)N1C[C@@H]2CCCC[C@@H]2C[C@H]1CNC(Cc1c[nH]cn1)C=O	SKLHMRHVVDDIOX-UTHQURFGSA-N	jm5b01461, Compound 143.1	3C-like proteinase (3CL-PRO)	Human SARS coronavirus		6300			10.1021/acs.jmedchem.5b01461	http://www.bindingdb.org/jsp/dbsearch/PrimarySearch_ki.jsp?energyterm=kJ/mole&tag=r21&monomerid=429324&enzyme=3C-like+proteinase+%283CL-PRO%29&column=ki&startPg=0&Increment=50&submit=Search	154732760
868674	Brc1ccc(cc1)C(=O)N1C[C@H]2CCCC[C@H]2C[C@@H]1CNC(Cc1c[nH]cn1)C=O	SKLHMRHVVDDIOX-ZPTOOEQTSA-N	jm5b01461, Compound 143.2	3C-like proteinase (3CL-PRO)	Human SARS coronavirus		175000			10.1021/acs.jmedchem.5b01461	http://www.bindingdb.org/jsp/dbsearch/PrimarySearch_ki.jsp?energyterm=kJ/mole&tag=r21&monomerid=429325&enzyme=3C-like+proteinase+%283CL-PRO%29&column=ki&startPg=0&Increment=50&submit=Search	154732761
868675	Fc1ccc(cc1)C(=O)N1CC2CCCCC2CC1CNC(Cc1c[nH]cn1)C=O		jm5b01461, Compound 144	3C-like proteinase (3CL-PRO)	Human SARS coronavirus		5700			10.1021/acs.jmedchem.5b01461	http://www.bindingdb.org/jsp/dbsearch/PrimarySearch_ki.jsp?energyterm=kJ/mole&tag=r21&monomerid=429326&enzyme=3C-like+proteinase+%283CL-PRO%29&column=ki&startPg=0&Increment=50&submit=Search	154732762
868676	CCC(C)c1ccc(cc1)N(C(C(=O)NC1CCCC1)c1cccnc1)C(=O)c1ccco1	KMPOAXYUGWTIIV-UHFFFAOYSA-N	Furan-2-carboxylic acid (4-sec-butyl-phenyl)-(cyclopentylcarbamoyl-pyridin-3-yl-methyl)-amide::MLS001222477::N-(4-butan-2-ylphenyl)-N-[2-(cyclopentylamino)-2-oxidanylidene-1-pyridin-3-yl-ethyl]furan-2-carboxamide::N-(4-butan-2-ylphenyl)-N-[2-(cyclopentylamino)-2-oxo-1-(3-pyridinyl)ethyl]-2-furancarboxamide::N-(4-butan-2-ylphenyl)-N-[2-(cyclopentylamino)-2-oxo-1-pyridin-3-ylethyl]furan-2-carboxami…	3C-like proteinase (3CL-PRO)	Human SARS coronavirus		2200			10.1021/acs.jmedchem.5b01461	http://www.bindingdb.org/jsp/dbsearch/PrimarySearch_ki.jsp?energyterm=kJ/mole&tag=r21&monomerid=47919&enzyme=3C-like+proteinase+%283CL-PRO%29&column=ki&startPg=0&Increment=50&submit=Search	3196508			ZINC13025377
868678	CC(C)(C)NC(=O)C(N(C(=O)c1ccco1)c1ccc(cc1)C(C)(C)C)c1cccnc1	JXGIYKRRPGCLFV-UHFFFAOYSA-N	jm5b01461, Compound 146	3C-like proteinase (3CL-PRO)	Human SARS coronavirus		4890			10.1021/acs.jmedchem.5b01461	http://www.bindingdb.org/jsp/dbsearch/PrimarySearch_ki.jsp?energyterm=kJ/mole&tag=r21&monomerid=429328&enzyme=3C-like+proteinase+%283CL-PRO%29&column=ki&startPg=0&Increment=50&submit=Search	44634772
868680	CC(C)c1ccc(cc1)N(C(C(=O)NC(C)(C)C)c1cccnc1)C(=O)c1ccco1	AZSKMWDSWHSDHV-UHFFFAOYSA-N	jm5b01461, Compound 147	3C-like proteinase (3CL-PRO)	Human SARS coronavirus		28100			10.1021/acs.jmedchem.5b01461	http://www.bindingdb.org/jsp/dbsearch/PrimarySearch_ki.jsp?energyterm=kJ/mole&tag=r21&monomerid=429330&enzyme=3C-like+proteinase+%283CL-PRO%29&column=ki&startPg=0&Increment=50&submit=Search	44634770
868681	CC(C)(C)NC(=O)C(N(C(=O)c1cnco1)c1ccc(cc1)C(C)(C)C)c1cccnc1	MRJDBDRLINRLIW-UHFFFAOYSA-N	jm5b01461, Compound 148	3C-like proteinase (3CL-PRO)	Human SARS coronavirus		39000			10.1021/acs.jmedchem.5b01461	http://www.bindingdb.org/jsp/dbsearch/PrimarySearch_ki.jsp?energyterm=kJ/mole&tag=r21&monomerid=429331&enzyme=3C-like+proteinase+%283CL-PRO%29&column=ki&startPg=0&Increment=50&submit=Search	45489447
868682	CC(C)(C)NC(=O)C(N(C(=O)c1cccs1)c1ccc(cc1)C(C)(C)C)c1cccnc1	RYEZRLQEBRCAQY-UHFFFAOYSA-N	jm5b01461, Compound 149	3C-like proteinase (3CL-PRO)	Human SARS coronavirus		50000			10.1021/acs.jmedchem.5b01461	http://www.bindingdb.org/jsp/dbsearch/PrimarySearch_ki.jsp?energyterm=kJ/mole&tag=r21&monomerid=429332&enzyme=3C-like+proteinase+%283CL-PRO%29&column=ki&startPg=0&Increment=50&submit=Search	45489449
868683	CC(C)(C)NC(=O)C(N(C(=O)c1c[nH]cn1)c1ccc(cc1)C(C)(C)C)c1cccnc1		US9975885, Compound 3P::med.21724, Compound 125	3C-like proteinase (3CL-PRO)	Human SARS coronavirus		6000			10.1021/acs.jmedchem.5b01461	http://www.bindingdb.org/jsp/dbsearch/PrimarySearch_ki.jsp?energyterm=kJ/mole&tag=r21&monomerid=420983&enzyme=3C-like+proteinase+%283CL-PRO%29&column=ki&startPg=0&Increment=50&submit=Search
868684	CC(C)(C)NC(=O)C(N(C(=O)c1ncco1)c1ccc(cc1)C(C)(C)C)c1cccnc1	DHFSVLXJSGMOHT-UHFFFAOYSA-N	jm5b01461, Compound 151	3C-like proteinase (3CL-PRO)	Human SARS coronavirus		47000			10.1021/acs.jmedchem.5b01461	http://www.bindingdb.org/jsp/dbsearch/PrimarySearch_ki.jsp?energyterm=kJ/mole&tag=r21&monomerid=429334&enzyme=3C-like+proteinase+%283CL-PRO%29&column=ki&startPg=0&Increment=50&submit=Search	46897838
868685	CC(C)(C)NC(=O)C(N(C(=O)c1ccc(Cl)o1)c1ccc(cc1)C(C)(C)C)c1cccnc1	XEIYKIDAVWIOEI-UHFFFAOYSA-N	jm5b01461, Compound 152	3C-like proteinase (3CL-PRO)	Human SARS coronavirus		5200			10.1021/acs.jmedchem.5b01461	http://www.bindingdb.org/jsp/dbsearch/PrimarySearch_ki.jsp?energyterm=kJ/mole&tag=r21&monomerid=429335&enzyme=3C-like+proteinase+%283CL-PRO%29&column=ki&startPg=0&Increment=50&submit=Search	46897836
868686	Cn1cnc(c1)C(=O)N(C(C(=O)NC(C)(C)C)c1cccnc1)c1ccc(cc1)C(C)(C)C	APPUOGWEGCGBON-UHFFFAOYSA-N	jm5b01461, Compound 153	3C-like proteinase (3CL-PRO)	Human SARS coronavirus		75000			10.1021/acs.jmedchem.5b01461	http://www.bindingdb.org/jsp/dbsearch/PrimarySearch_ki.jsp?energyterm=kJ/mole&tag=r21&monomerid=429336&enzyme=3C-like+proteinase+%283CL-PRO%29&column=ki&startPg=0&Increment=50&submit=Search	51003643
868687	CC(C)(C)NC(=O)C(N(C(=O)c1ccco1)c1ccc(cc1)C(C)(C)C)c1ccnnc1	TZXGZESALXRMTD-UHFFFAOYSA-N	jm5b01461, Compound 154	3C-like proteinase (3CL-PRO)	Human SARS coronavirus		10000			10.1021/acs.jmedchem.5b01461	http://www.bindingdb.org/jsp/dbsearch/PrimarySearch_ki.jsp?energyterm=kJ/mole&tag=r21&monomerid=429337&enzyme=3C-like+proteinase+%283CL-PRO%29&column=ki&startPg=0&Increment=50&submit=Search	51003635
868688	CC(C)(C)NC(=O)C(N(C(=O)c1ccco1)c1ccc(cc1)C(C)(C)C)c1ccncn1	AVBMZTFEHFFYPA-UHFFFAOYSA-N	jm5b01461, Compound 155	3C-like proteinase (3CL-PRO)	Human SARS coronavirus		5500			10.1021/acs.jmedchem.5b01461	http://www.bindingdb.org/jsp/dbsearch/PrimarySearch_ki.jsp?energyterm=kJ/mole&tag=r21&monomerid=429338&enzyme=3C-like+proteinase+%283CL-PRO%29&column=ki&startPg=0&Increment=50&submit=Search	154732765
868689	CC(C)(C)NC(=O)C(N(C(=O)c1ccco1)c1ccc(cc1)C(C)(C)C)c1ccncc1	PUZODRXERPKEFT-UHFFFAOYSA-N	jm5b01461, Compound 156	3C-like proteinase (3CL-PRO)	Human SARS coronavirus		45000			10.1021/acs.jmedchem.5b01461	http://www.bindingdb.org/jsp/dbsearch/PrimarySearch_ki.jsp?energyterm=kJ/mole&tag=r21&monomerid=429339&enzyme=3C-like+proteinase+%283CL-PRO%29&column=ki&startPg=0&Increment=50&submit=Search	51003641
868690	CCC(C)(C)NC(=O)C(N(C(=O)Cn1nnc2ccccc12)c1ccc(NC(C)=O)cc1)c1ccn(C)c1	DSWIUPQAVIEPFY-UHFFFAOYSA-N	jm5b01461, Compound 157	3C-like proteinase (3CL-PRO)	Human SARS coronavirus		6200			10.1021/acs.jmedchem.5b01461	http://www.bindingdb.org/jsp/dbsearch/PrimarySearch_ki.jsp?energyterm=kJ/mole&tag=r21&monomerid=429340&enzyme=3C-like+proteinase+%283CL-PRO%29&column=ki&startPg=0&Increment=50&submit=Search	154732766
868692	CCC(C)(C)NC(=O)C(N(C(=O)Cn1cc(nn1)-c1ccccc1)c1ccc(NC(C)=O)cc1)c1ccn(C)c1	LJMKNURYWDTIOI-UHFFFAOYSA-N	jm5b01461, Compound 158	3C-like proteinase (3CL-PRO)	Human SARS coronavirus		11000			10.1021/acs.jmedchem.5b01461	http://www.bindingdb.org/jsp/dbsearch/PrimarySearch_ki.jsp?energyterm=kJ/mole&tag=r21&monomerid=429341&enzyme=3C-like+proteinase+%283CL-PRO%29&column=ki&startPg=0&Increment=50&submit=Search	154732767
868693	CCC(=O)Nc1ccc(cc1)N(C(C(=O)NC(C)(C)C)c1ccn(C)c1)C(=O)Cn1nnc2ccccc12	RDLGHIVHQIUESK-UHFFFAOYSA-N	jm5b01461, Compound 159	3C-like proteinase (3CL-PRO)	Human SARS coronavirus		6900			10.1021/acs.jmedchem.5b01461	http://www.bindingdb.org/jsp/dbsearch/PrimarySearch_ki.jsp?energyterm=kJ/mole&tag=r21&monomerid=429342&enzyme=3C-like+proteinase+%283CL-PRO%29&column=ki&startPg=0&Increment=50&submit=Search	154732768
868694	CC(C)C(=O)Nc1ccc(cc1)N(C(C(=O)NC(C)(C)C)c1ccn(C)c1)C(=O)Cn1nnc2ccccc12	WPRVPGYUYHNTCD-UHFFFAOYSA-N	jm5b01461, Compound 160	3C-like proteinase (3CL-PRO)	Human SARS coronavirus		4100			10.1021/acs.jmedchem.5b01461	http://www.bindingdb.org/jsp/dbsearch/PrimarySearch_ki.jsp?energyterm=kJ/mole&tag=r21&monomerid=429343&enzyme=3C-like+proteinase+%283CL-PRO%29&column=ki&startPg=0&Increment=50&submit=Search	154732769
868695	Cn1ccc(c1)C(N(C(=O)Cn1nnc2ccccc12)c1ccc(NC(=O)C2CC2)cc1)C(=O)NC(C)(C)C	HBHBWMGZJMFFDQ-UHFFFAOYSA-N	jm5b01461, Compound 161	3C-like proteinase (3CL-PRO)	Human SARS coronavirus		9100			10.1021/acs.jmedchem.5b01461	http://www.bindingdb.org/jsp/dbsearch/PrimarySearch_ki.jsp?energyterm=kJ/mole&tag=r21&monomerid=429344&enzyme=3C-like+proteinase+%283CL-PRO%29&column=ki&startPg=0&Increment=50&submit=Search	154732770
868696	Cn1ccc(c1)C(N(C(=O)Cn1nnc2ccccc12)c1ccc(NC(=O)C2CCC2)cc1)C(=O)NC(C)(C)C	SKZLYOKRMPXIMT-UHFFFAOYSA-N	jm5b01461, Compound 162	3C-like proteinase (3CL-PRO)	Human SARS coronavirus		3800			10.1021/acs.jmedchem.5b01461	http://www.bindingdb.org/jsp/dbsearch/PrimarySearch_ki.jsp?energyterm=kJ/mole&tag=r21&monomerid=429345&enzyme=3C-like+proteinase+%283CL-PRO%29&column=ki&startPg=0&Increment=50&submit=Search	154732771
868697	CCC(=O)Nc1ccc(cc1)N(Cc1ccn(C)c1)C(=O)Cn1nnc2ccccc12	NVZHSDUILOXRDB-UHFFFAOYSA-N	jm5b01461, Compound 163	3C-like proteinase (3CL-PRO)	Human SARS coronavirus		2900			10.1021/acs.jmedchem.5b01461	http://www.bindingdb.org/jsp/dbsearch/PrimarySearch_ki.jsp?energyterm=kJ/mole&tag=r21&monomerid=429346&enzyme=3C-like+proteinase+%283CL-PRO%29&column=ki&startPg=0&Increment=50&submit=Search	154732772
868698	CC(C)C(=O)Nc1ccc(cc1)N(Cc1ccn(C)c1)C(=O)Cn1nnc2ccccc12	VJOKGSHLVXBTMJ-UHFFFAOYSA-N	jm5b01461, Compound 164	3C-like proteinase (3CL-PRO)	Human SARS coronavirus		3600			10.1021/acs.jmedchem.5b01461	http://www.bindingdb.org/jsp/dbsearch/PrimarySearch_ki.jsp?energyterm=kJ/mole&tag=r21&monomerid=429347&enzyme=3C-like+proteinase+%283CL-PRO%29&column=ki&startPg=0&Increment=50&submit=Search	154732773
868699	Cn1ccc(CN(C(=O)Cn2nnc3ccccc23)c2ccc(NC(=O)C3CC3)cc2)c1	DUFQFRYUZLXBJG-UHFFFAOYSA-N	jm5b01461, Compound 165	3C-like proteinase (3CL-PRO)	Human SARS coronavirus		4100			10.1021/acs.jmedchem.5b01461	http://www.bindingdb.org/jsp/dbsearch/PrimarySearch_ki.jsp?energyterm=kJ/mole&tag=r21&monomerid=429348&enzyme=3C-like+proteinase+%283CL-PRO%29&column=ki&startPg=0&Increment=50&submit=Search	154732774
868700	Cn1ccc(CN(C(=O)Cn2nnc3ccccc23)c2ccc(NC(=O)C3CCC3)cc2)c1	GCKOPCRBYMBMFN-UHFFFAOYSA-N	jm5b01461, Compound 166	3C-like proteinase (3CL-PRO)	Human SARS coronavirus		8100			10.1021/acs.jmedchem.5b01461	http://www.bindingdb.org/jsp/dbsearch/PrimarySearch_ki.jsp?energyterm=kJ/mole&tag=r21&monomerid=429349&enzyme=3C-like+proteinase+%283CL-PRO%29&column=ki&startPg=0&Increment=50&submit=Search	154732775
868701	Cn1ccc(CN(C(=O)Cn2nnc3ccccc23)c2ccc(cc2)-c2ccccc2)c1	FTYGCQPQCNRKNV-UHFFFAOYSA-N	jm5b01461, Compound 167	3C-like proteinase (3CL-PRO)	Human SARS coronavirus		51			10.1021/acs.jmedchem.5b01461	http://www.bindingdb.org/jsp/dbsearch/PrimarySearch_ki.jsp?energyterm=kJ/mole&tag=r21&monomerid=429350&enzyme=3C-like+proteinase+%283CL-PRO%29&column=ki&startPg=0&Increment=50&submit=Search	154730263
868702	CC(=O)O[Hg]c1ccccc1	XEBWQGVWTUSTLN-UHFFFAOYSA-M	jm5b01461, Compound 168	3C-like proteinase (3CL-PRO)	Human SARS coronavirus	700				10.1021/acs.jmedchem.5b01461	http://www.bindingdb.org/jsp/dbsearch/PrimarySearch_ki.jsp?energyterm=kJ/mole&tag=r21&monomerid=429351&enzyme=3C-like+proteinase+%283CL-PRO%29&column=ki&startPg=0&Increment=50&submit=Search	16682730
868703	CC[Hg]Sc1ccccc1C([O-])=O	HXQVQGWHFRNKMS-UHFFFAOYSA-L	MLS001336050::SMR000875330::Thimerosal::cid_16684434::jm5b01461, Compound 169::sodium;(2-carboxylatophenyl)sulfanyl-ethyl-mercury::sodium;(2-carboxylatophenyl)sulfanyl-ethylmercury::sodium;[(2-carboxylatophenyl)thio]-ethyl-mercury::sodium;[(2-carboxylatophenyl)thio]-ethylmercury	3C-like proteinase (3CL-PRO)	Human SARS coronavirus	2400				10.1021/acs.jmedchem.5b01461	http://www.bindingdb.org/jsp/dbsearch/PrimarySearch_ki.jsp?energyterm=kJ/mole&tag=r21&monomerid=60990&enzyme=3C-like+proteinase+%283CL-PRO%29&column=ki&startPg=0&Increment=50&submit=Search	16684927
868704	[O-][N+](=O)O[Hg]c1ccccc1	PDTFCHSETJBPTR-UHFFFAOYSA-N	jm5b01461, Compound 170	3C-like proteinase (3CL-PRO)	Human SARS coronavirus	300				10.1021/acs.jmedchem.5b01461	http://www.bindingdb.org/jsp/dbsearch/PrimarySearch_ki.jsp?energyterm=kJ/mole&tag=r21&monomerid=429353&enzyme=3C-like+proteinase+%283CL-PRO%29&column=ki&startPg=0&Increment=50&submit=Search	16682924
868705	[O-][n+]1ccccc1S[Zn]Sc1cccc[n+]1[O-]	OTPSWLRZXRHDNX-UHFFFAOYSA-L	jm5b01461, Compound 171	3C-like proteinase (3CL-PRO)	Human SARS coronavirus	170				10.1021/acs.jmedchem.5b01461	http://www.bindingdb.org/jsp/dbsearch/PrimarySearch_ki.jsp?energyterm=kJ/mole&tag=r21&monomerid=429354&enzyme=3C-like+proteinase+%283CL-PRO%29&column=ki&startPg=0&Increment=50&submit=Search	26041
868706	CCN(C(=S)S[Zn]SC(=S)N(CC)c1ccccc1)c1ccccc1	KMNUDJAXRXUZQS-UHFFFAOYSA-L	jm5b01461, Compound 172	3C-like proteinase (3CL-PRO)	Human SARS coronavirus	1000				10.1021/acs.jmedchem.5b01461	http://www.bindingdb.org/jsp/dbsearch/PrimarySearch_ki.jsp?energyterm=kJ/mole&tag=r21&monomerid=429355&enzyme=3C-like+proteinase+%283CL-PRO%29&column=ki&startPg=0&Increment=50&submit=Search	61753
868707	Cc1ccc2S[Zn]Nc2c1	ZSFFPVIDAWFQOK-UHFFFAOYSA-M	jm5b01461, Compound 173	3C-like proteinase (3CL-PRO)	Human SARS coronavirus	1400				10.1021/acs.jmedchem.5b01461	http://www.bindingdb.org/jsp/dbsearch/PrimarySearch_ki.jsp?energyterm=kJ/mole&tag=r21&monomerid=429356&enzyme=3C-like+proteinase+%283CL-PRO%29&column=ki&startPg=0&Increment=50&submit=Search	154732776
868708	OC(=O)CC1N[Zn]2(NC(CC(O)=O)C(=O)O2)OC1=O	QMSRMRCTKAHSMQ-UHFFFAOYSA-L	jm5b01461, Compound 174	3C-like proteinase (3CL-PRO)	Human SARS coronavirus	60				10.1021/acs.jmedchem.5b01461	http://www.bindingdb.org/jsp/dbsearch/PrimarySearch_ki.jsp?energyterm=kJ/mole&tag=r21&monomerid=429357&enzyme=3C-like+proteinase+%283CL-PRO%29&column=ki&startPg=0&Increment=50&submit=Search	154732777
868709	OB(O)c1cccc(COC(=O)c2cc(cc(c2)[N+]([O-])=O)B(O)O)c1	MVAKMWCFLBGPRM-UHFFFAOYSA-N	jm5b01461, Compound 175	3C-like proteinase (3CL-PRO)	Human SARS coronavirus	4500				10.1021/acs.jmedchem.5b01461	http://www.bindingdb.org/jsp/dbsearch/PrimarySearch_ki.jsp?energyterm=kJ/mole&tag=r21&monomerid=429358&enzyme=3C-like+proteinase+%283CL-PRO%29&column=ki&startPg=0&Increment=50&submit=Search	3009584
868710	OB(O)c1cc(cc(c1)[N+]([O-])=O)C(=O)OCc1ccccc1COC(=O)c1cc(cc(c1)[N+]([O-])=O)B(O)O	YNGFYVBGKRZQPV-UHFFFAOYSA-N	jm5b01461, Compound 176	3C-like proteinase (3CL-PRO)	Human SARS coronavirus	6000				10.1021/acs.jmedchem.5b01461	http://www.bindingdb.org/jsp/dbsearch/PrimarySearch_ki.jsp?energyterm=kJ/mole&tag=r21&monomerid=429359&enzyme=3C-like+proteinase+%283CL-PRO%29&column=ki&startPg=0&Increment=50&submit=Search	3009586
868711	OB(O)c1cc(cc(c1)[N+]([O-])=O)C(=O)Nc1ccc(NC(=O)c2cc(cc(c2)[N+]([O-])=O)B(O)O)cc1	JBHJLTFEEOIBFO-UHFFFAOYSA-N	jm5b01461, Compound 177	3C-like proteinase (3CL-PRO)	Human SARS coronavirus	40				10.1021/acs.jmedchem.5b01461	http://www.bindingdb.org/jsp/dbsearch/PrimarySearch_ki.jsp?energyterm=kJ/mole&tag=r21&monomerid=429360&enzyme=3C-like+proteinase+%283CL-PRO%29&column=ki&startPg=0&Increment=50&submit=Search	5742801
868712	Oc1ccccc1\C=N\c1ccc(cc1)C([O-])=O	CZNXQJHAMQNIHB-OQLLNIDSSA-M	jm5b01461, Compound 178	3C-like proteinase (3CL-PRO)	Human SARS coronavirus				23000	10.1021/acs.jmedchem.5b01461	http://www.bindingdb.org/jsp/dbsearch/PrimarySearch_ki.jsp?energyterm=kJ/mole&tag=r21&monomerid=429361&enzyme=3C-like+proteinase+%283CL-PRO%29&column=ki&startPg=0&Increment=50&submit=Search	135496924
868713	CC1=C(C(C2C(CCCC2=O)N1)c1ccccc1[N+]([O-])=O)C(=O)OCCc1ccccc1	TYYASYBDGIPMJT-UHFFFAOYSA-N	jm5b01461, Compound 179	3C-like proteinase (3CL-PRO)	Human SARS coronavirus		2500			10.1021/acs.jmedchem.5b01461	http://www.bindingdb.org/jsp/dbsearch/PrimarySearch_ki.jsp?energyterm=kJ/mole&tag=r21&monomerid=429362&enzyme=3C-like+proteinase+%283CL-PRO%29&column=ki&startPg=0&Increment=50&submit=Search	154732778
868714	CC1=C(C(C2C(CCCC2=O)N1)c1ccccc1[N+]([O-])=O)C(=O)OCCc1ccccc1	TYYASYBDGIPMJT-UHFFFAOYSA-N	jm5b01461, Compound 179	3C-like proteinase (3CL-PRO)	Human SARS coronavirus				7000	10.1021/acs.jmedchem.5b01461	http://www.bindingdb.org/jsp/dbsearch/PrimarySearch_ki.jsp?energyterm=kJ/mole&tag=r21&monomerid=429362&enzyme=3C-like+proteinase+%283CL-PRO%29&column=ki&startPg=0&Increment=50&submit=Search	154732778
868715	Cc1ccc2nc(sc2c1S(O)(=O)=O)-c1ccc(N)cc1	KGZUHYIHYBDNLC-UHFFFAOYSA-N	CHEMBL1339340::jm5b01461, Compound 180	3C-like proteinase (3CL-PRO)	Human SARS coronavirus		4300			10.1021/acs.jmedchem.5b01461	http://www.bindingdb.org/jsp/dbsearch/PrimarySearch_ki.jsp?energyterm=kJ/mole&tag=r21&monomerid=50443527&enzyme=3C-like+proteinase+%283CL-PRO%29&column=ki&startPg=0&Increment=50&submit=Search	174223	CHEMBL1339340
868716	Oc1cc(cc2oc(cc12)C([O-])=O)C(F)(F)F	KEYHIPIBGSAJQX-UHFFFAOYSA-M	jm5b01461, Compound 181	3C-like proteinase (3CL-PRO)	Human SARS coronavirus		4300			10.1021/acs.jmedchem.5b01461	http://www.bindingdb.org/jsp/dbsearch/PrimarySearch_ki.jsp?energyterm=kJ/mole&tag=r21&monomerid=429364&enzyme=3C-like+proteinase+%283CL-PRO%29&column=ki&startPg=0&Increment=50&submit=Search	154732780
868717	O=C(CSc1nc(nc2ccccc12)C1CCCCC1)NCc1ccco1	TUMJQFRANSTLTQ-UHFFFAOYSA-N	2-[(2-cyclohexylquinazolin-4-yl)sulfanyl]-N-(furan-2-ylmethyl)acetamide::Compound PJ07::jm5b01461, Compound 182	3C-like proteinase (3CL-PRO)	Human SARS coronavirus		18200			10.1021/acs.jmedchem.5b01461	http://www.bindingdb.org/jsp/dbsearch/PrimarySearch_ki.jsp?energyterm=kJ/mole&tag=r21&monomerid=23307&enzyme=3C-like+proteinase+%283CL-PRO%29&column=ki&startPg=0&Increment=50&submit=Search	1465905			ZINC01376434
868718	Cc1ccccc1CCN(Cc1cc2cc(C)c(C)cc2[nH]c1=O)C(=O)NCc1ccccc1	SQUUVUDFHHMCTC-UHFFFAOYSA-N	3-benzyl-1-[(6,7-dimethyl-2-oxo-1,2-dihydroquinolin-3-yl)methyl]-1-[2-(2-methylphenyl)ethyl]urea::Compound PJ169::jm5b01461, Compound 183	3C-like proteinase (3CL-PRO)	Human SARS coronavirus		17200			10.1021/acs.jmedchem.5b01461	http://www.bindingdb.org/jsp/dbsearch/PrimarySearch_ki.jsp?energyterm=kJ/mole&tag=r21&monomerid=23308&enzyme=3C-like+proteinase+%283CL-PRO%29&column=ki&startPg=0&Increment=50&submit=Search	3194487			ZINC12704746
868719	OC[C@H]1O[C@H]([C@H](O)[C@@H]1O)N1CNc2c1ncnc2Cl	PSTAHNPUZMOMDV-KQYNXXCUSA-N	jm5b01461, Compound 184	3C-like proteinase (3CL-PRO)	Human SARS coronavirus		48700			10.1021/acs.jmedchem.5b01461	http://www.bindingdb.org/jsp/dbsearch/PrimarySearch_ki.jsp?energyterm=kJ/mole&tag=r21&monomerid=429367&enzyme=3C-like+proteinase+%283CL-PRO%29&column=ki&startPg=0&Increment=50&submit=Search	154732783
868720	OCC1C(COCc2ccccc2)CC1N1CNc2c1ncnc2Cl	QWRCGWIFSJGDFR-UHFFFAOYSA-N	jm5b01461, Compound 185	3C-like proteinase (3CL-PRO)	Human SARS coronavirus		14500			10.1021/acs.jmedchem.5b01461	http://www.bindingdb.org/jsp/dbsearch/PrimarySearch_ki.jsp?energyterm=kJ/mole&tag=r21&monomerid=429368&enzyme=3C-like+proteinase+%283CL-PRO%29&column=ki&startPg=0&Increment=50&submit=Search	154732784
868721	CN(C)CCCNC(=O)C(\NC(=O)c1ccc(C)cc1)=C\c1ccc(o1)-c1cccc(c1)[N+]([O-])=O	QFOLMPFZCVBCTJ-QJOMJCCJSA-N	MLS001163269::N-[(Z)-1-[3-(dimethylamino)propylcarbamoyl]-2-[5-(3-nitrophenyl)-2-furyl]vinyl]-4-methyl-benzamide::N-[(Z)-3-[3-(dimethylamino)propylamino]-1-[5-(3-nitrophenyl)-2-furanyl]-3-oxoprop-1-en-2-yl]-4-methylbenzamide::N-[(Z)-3-[3-(dimethylamino)propylamino]-1-[5-(3-nitrophenyl)furan-2-yl]-3-oxidanylidene-prop-1-en-2-yl]-4-methyl-benzamide::N-[(Z)-3-[3-(dimethylamino)propylamino]-1-[5-(3-n…	3C-like proteinase (3CL-PRO)	Human SARS coronavirus	9110				10.1021/acs.jmedchem.5b01461	http://www.bindingdb.org/jsp/dbsearch/PrimarySearch_ki.jsp?energyterm=kJ/mole&tag=r21&monomerid=78957&enzyme=3C-like+proteinase+%283CL-PRO%29&column=ki&startPg=0&Increment=50&submit=Search	2131972			ZINC12732678
868722	CN(C)CCCNC(=O)C(\NC(=O)c1ccc(C)cc1)=C\c1ccc(o1)-c1ccccc1[N+]([O-])=O	AAVOXWIZJYSGEP-XLNRJJMWSA-N	CHEMBL1315054::MLS001164598::N-[(Z)-1-[3-(dimethylamino)propylcarbamoyl]-2-[5-(2-nitrophenyl)-2-furyl]vinyl]-4-methyl-benzamide::N-[(Z)-3-[3-(dimethylamino)propylamino]-1-[5-(2-nitrophenyl)-2-furanyl]-3-oxoprop-1-en-2-yl]-4-methylbenzamide::N-[(Z)-3-[3-(dimethylamino)propylamino]-1-[5-(2-nitrophenyl)furan-2-yl]-3-oxidanylidene-prop-1-en-2-yl]-4-methyl-benzamide::N-[(Z)-3-[3-(dimethylamino)propyla…	3C-like proteinase (3CL-PRO)	Human SARS coronavirus	9930				10.1021/acs.jmedchem.5b01461	http://www.bindingdb.org/jsp/dbsearch/PrimarySearch_ki.jsp?energyterm=kJ/mole&tag=r21&monomerid=53105&enzyme=3C-like+proteinase+%283CL-PRO%29&column=ki&startPg=0&Increment=50&submit=Search	2131982	CHEMBL1315054		ZINC03375982
868723	Nc1ncnc2[nH]c(nc12)C(F)(F)F	LMWFSHBVFKCMHW-UHFFFAOYSA-N	8-(trifluoromethyl)-9H-purin-6-amine (4)::jm5b01461, Compound 188	3C-like proteinase (3CL-PRO)	Human SARS coronavirus		13900			10.1021/acs.jmedchem.5b01461	http://www.bindingdb.org/jsp/dbsearch/PrimarySearch_ki.jsp?energyterm=kJ/mole&tag=r21&monomerid=154573&enzyme=3C-like+proteinase+%283CL-PRO%29&column=ki&startPg=0&Increment=50&submit=Search	3635406
868724	Cn1cnc2cc(NC(=O)c3ccc(Cl)cc3)ccc12	ZGWWNEJGNSSLGF-UHFFFAOYSA-N	4-chloranyl-N-(1-methylbenzimidazol-5-yl)benzamide::4-chloro-N-(1-methyl-5-benzimidazolyl)benzamide::4-chloro-N-(1-methylbenzimidazol-5-yl)benzamide::MLS000114443::SMR000091830::cid_948801::jm5b01461, Compound 189	3C-like proteinase (3CL-PRO)	Human SARS coronavirus		18200			10.1021/acs.jmedchem.5b01461	http://www.bindingdb.org/jsp/dbsearch/PrimarySearch_ki.jsp?energyterm=kJ/mole&tag=r21&monomerid=47844&enzyme=3C-like+proteinase+%283CL-PRO%29&column=ki&startPg=0&Increment=50&submit=Search	948801			ZINC00549192
868760	CCOC(=O)\C=C\[C@H](C[C@@H]1CCNC1=O)NC(=O)[C@@H](CC(=O)[C@@H](NC(=O)c1cc(C)on1)C(C)C)Cc1ccc(F)cc1	CAYJBRBGZBCZKO-BHGBQCOSSA-N	AG7088::CHEMBL20210::ethyl (2E,4S)-4-[((2R,5S)-2-(4-fluorobenzyl)-6-methyl-5-{[(5-methylisoxazol-3-yl)carbonyl]amino}-4-oxoheptanoyl)amino]-5-[(3S)-2-oxopyrrolidin-3-yl]pent-2-enoate::ethyl (2E,4S)-4-[(2R,5S)-2-[(4-fluorophenyl)methyl]-6-methyl-5-[(5-methyl-1,2-oxazol-3-yl)formamido]-4-oxoheptanamido]-5-[(3S)-2-oxopyrrolidin-3-yl]pent-2-enoate::med.21724, Compound 29	3C-like proteinase (3CL-PRO)	Human SARS coronavirus		800000			10.1002/med.21724	http://www.bindingdb.org/jsp/dbsearch/PrimarySearch_ki.jsp?energyterm=kJ/mole&tag=r21&monomerid=11243&enzyme=3C-like+proteinase+%283CL-PRO%29&column=ki&startPg=0&Increment=50&submit=Search	6440352	CHEMBL20210	DB05102	ZINC03919807
868761	CCOC(=O)\C=C\[C@H](C[C@@H]1CCNC1=O)NC(=O)[C@@H](CC(=O)[C@@H](NC(=O)c1cc(C)on1)C(C)C)Cc1ccc(F)cc1	CAYJBRBGZBCZKO-BHGBQCOSSA-N	AG7088::CHEMBL20210::ethyl (2E,4S)-4-[((2R,5S)-2-(4-fluorobenzyl)-6-methyl-5-{[(5-methylisoxazol-3-yl)carbonyl]amino}-4-oxoheptanoyl)amino]-5-[(3S)-2-oxopyrrolidin-3-yl]pent-2-enoate::ethyl (2E,4S)-4-[(2R,5S)-2-[(4-fluorophenyl)methyl]-6-methyl-5-[(5-methyl-1,2-oxazol-3-yl)formamido]-4-oxoheptanamido]-5-[(3S)-2-oxopyrrolidin-3-yl]pent-2-enoate::med.21724, Compound 29	3C-like proteinase (3CL-PRO)	Human SARS coronavirus	>10000				10.1002/med.21724	http://www.bindingdb.org/jsp/dbsearch/PrimarySearch_ki.jsp?energyterm=kJ/mole&tag=r21&monomerid=11243&enzyme=3C-like+proteinase+%283CL-PRO%29&column=ki&startPg=0&Increment=50&submit=Search	6440352	CHEMBL20210	DB05102	ZINC03919807
868763	CCOC(=O)C=C[C@H](Cc1ccccc1)NC(=O)[C@@H](CC(=O)[C@@H](NC(=O)c1cc(C)on1)C(C)C)Cc1ccc(F)cc1	FCVVBRNWNKLOCV-YLJIJCFQSA-N	med.21724, Compound 30	3C-like proteinase (3CL-PRO)	Human SARS coronavirus		39000			10.1002/med.21724	http://www.bindingdb.org/jsp/dbsearch/PrimarySearch_ki.jsp?energyterm=kJ/mole&tag=r21&monomerid=429301&enzyme=3C-like+proteinase+%283CL-PRO%29&column=ki&startPg=0&Increment=50&submit=Search	15959294
868764	CCOC(=O)C=C[C@H](Cc1ccccc1)NC(=O)[C@@H](CC(=O)[C@@H](NC(=O)c1cc(C)on1)C(C)C)Cc1ccccc1	ZNJXQWIARYSQOT-INZYYWFGSA-N	med.21724, Compound 31	3C-like proteinase (3CL-PRO)	Human SARS coronavirus		13000			10.1002/med.21724	http://www.bindingdb.org/jsp/dbsearch/PrimarySearch_ki.jsp?energyterm=kJ/mole&tag=r21&monomerid=429302&enzyme=3C-like+proteinase+%283CL-PRO%29&column=ki&startPg=0&Increment=50&submit=Search	15959296
868765	CCOC(=O)C=C[C@H](C[C@@H]1CNC(=O)C1)NC(=O)[C@@H](CC(=O)[C@@H](NC(=O)c1cc(C)on1)C(C)C)Cc1ccccc1	HVOSWZNMVWLQKF-KRHJQYNLSA-N	med.21724, Compound 32	3C-like proteinase (3CL-PRO)	Human SARS coronavirus		45000			10.1002/med.21724	http://www.bindingdb.org/jsp/dbsearch/PrimarySearch_ki.jsp?energyterm=kJ/mole&tag=r21&monomerid=429303&enzyme=3C-like+proteinase+%283CL-PRO%29&column=ki&startPg=0&Increment=50&submit=Search	154732742
868766	CCOC(=O)C=C[C@H](C[C@@H]1CNC(=O)C1)NC(=O)[C@H](CC=C(C)C)CC(=O)[C@@H](NC(=O)c1cc(C)on1)C(C)C	FTRNPQQWVUYXFE-RWMXLGDXSA-N	med.21724, Compound 33	3C-like proteinase (3CL-PRO)	Human SARS coronavirus		70000			10.1002/med.21724	http://www.bindingdb.org/jsp/dbsearch/PrimarySearch_ki.jsp?energyterm=kJ/mole&tag=r21&monomerid=429313&enzyme=3C-like+proteinase+%283CL-PRO%29&column=ki&startPg=0&Increment=50&submit=Search	154732749
868767	CCOC(=O)C=C[C@H](C[C@@H]1CNC(=O)C1)NC(=O)[C@H](CC=C(C)C)CC(=O)[C@@H](NC(=O)[C@H](CO)NC(=O)OC(C)(C)C)C(C)C	WMDOTXJHZSWHKK-ZFHLNNJNSA-N	med.21724, Compound 34	3C-like proteinase (3CL-PRO)	Human SARS coronavirus		75000			10.1002/med.21724	http://www.bindingdb.org/jsp/dbsearch/PrimarySearch_ki.jsp?energyterm=kJ/mole&tag=r21&monomerid=429327&enzyme=3C-like+proteinase+%283CL-PRO%29&column=ki&startPg=0&Increment=50&submit=Search	154732763
868769	CCOC(=O)\C=C\[C@H](C[C@@H]1CCNC1=O)NC(=O)[C@@H](CC(=O)[C@@H](NC(=O)OCc1ccccc1)C(C)C)Cc1ccccc1	NNUSBUJYBPVXNX-MPJJSOSNSA-N	AG7088 analogue 1d::ethyl (2E,4S)-4-[(2R,5S)-2-benzyl-5-{[(benzyloxy)carbonyl]amino}-6-methyl-4-oxoheptanamido]-5-[(3S)-2-oxopyrrolidin-3-yl]pent-2-enoate::med.21724, Compound 36	3C-like proteinase (3CL-PRO)	Human SARS coronavirus	2260				10.1002/med.21724	http://www.bindingdb.org/jsp/dbsearch/PrimarySearch_ki.jsp?energyterm=kJ/mole&tag=r21&monomerid=11246&enzyme=3C-like+proteinase+%283CL-PRO%29&column=ki&startPg=0&Increment=50&submit=Search	15959292			ZINC14947888
868771	CCOC(=O)\C=C\[C@H](C[C@@H]1CCNC1=O)NC(=O)[C@H](CC(C)C)CC(=O)[C@@H](NC(=O)OCc1ccccc1)C(C)C	JPIYOETYIJDLEJ-YTZBWCSPSA-N	med.21724, Compound 37	3C-like proteinase (3CL-PRO)	Human SARS coronavirus	660				10.1002/med.21724	http://www.bindingdb.org/jsp/dbsearch/PrimarySearch_ki.jsp?energyterm=kJ/mole&tag=r21&monomerid=429363&enzyme=3C-like+proteinase+%283CL-PRO%29&column=ki&startPg=0&Increment=50&submit=Search	154732779
868773	CCOC(=O)\C=C\[C@H](C[C@@H]1CCNC1=O)NC(=O)[C@H](CC(C)C)CC(=O)[C@@H](NC(=O)OCc1ccccc1)C(C)OC(C)(C)C	OTCMEFFEISETTA-SEUQUYCISA-N	med.21724, Compound 38	3C-like proteinase (3CL-PRO)	Human SARS coronavirus	50				10.1002/med.21724	http://www.bindingdb.org/jsp/dbsearch/PrimarySearch_ki.jsp?energyterm=kJ/mole&tag=r21&monomerid=429365&enzyme=3C-like+proteinase+%283CL-PRO%29&column=ki&startPg=0&Increment=50&submit=Search	154732782
868775	CCOC(=O)\C=C\[C@H](Cc1ccccc1)NC(=O)[C@H](Cc1ccccc1)NC(=O)\C=C\c1ccc(cc1)N(C)C	JWPLKCWYGMPRGX-ZIIPDIQWSA-N	dipeptidomimetic unsaturated ester 18c::ethyl (2E,4S)-4-[(2S)-2-[(2E)-3-[4-(dimethylamino)phenyl]prop-2-enamido]-3-phenylpropanamido]-5-phenylpent-2-enoate::ethyl (2E,4S)-4-[(N-{(2E)-3-[4-(dimethylamino)phenyl]prop-2-enoyl}-L-phenylalanyl)amino]-5-phenylpent-2-enoate::med.21724, Compound 39	3C-like proteinase (3CL-PRO)	Human SARS coronavirus	520				10.1002/med.21724	http://www.bindingdb.org/jsp/dbsearch/PrimarySearch_ki.jsp?energyterm=kJ/mole&tag=r21&monomerid=11261&enzyme=3C-like+proteinase+%283CL-PRO%29&column=ki&startPg=0&Increment=50&submit=Search	11555658			ZINC14947930
868776	CCOC(=O)\C=C\[C@H](Cc1ccccc1)NC(=O)[C@H](Cc1ccccc1)NC(=O)\C=C\c1ccc(cc1)N(C)C	JWPLKCWYGMPRGX-ZIIPDIQWSA-N	dipeptidomimetic unsaturated ester 18c::ethyl (2E,4S)-4-[(2S)-2-[(2E)-3-[4-(dimethylamino)phenyl]prop-2-enamido]-3-phenylpropanamido]-5-phenylpent-2-enoate::ethyl (2E,4S)-4-[(N-{(2E)-3-[4-(dimethylamino)phenyl]prop-2-enoyl}-L-phenylalanyl)amino]-5-phenylpent-2-enoate::med.21724, Compound 39	3C-like proteinase (3CL-PRO)	Human SARS coronavirus				180	10.1002/med.21724	http://www.bindingdb.org/jsp/dbsearch/PrimarySearch_ki.jsp?energyterm=kJ/mole&tag=r21&monomerid=11261&enzyme=3C-like+proteinase+%283CL-PRO%29&column=ki&startPg=0&Increment=50&submit=Search	11555658			ZINC14947930
868777	CC(C)C[C@H](CC(=O)[C@H](C)NC(=O)c1cc(C)on1)C(=O)N[C@@H](C[C@@H]1CCNC1=O)\C=C\C(=O)OCc1ccccc1	XWIRFBJRAHHFDU-SUDCFNBMSA-N	med.21724, Compound 40	3C-like proteinase (3CL-PRO)	Human SARS coronavirus	9000				10.1002/med.21724	http://www.bindingdb.org/jsp/dbsearch/PrimarySearch_ki.jsp?energyterm=kJ/mole&tag=r21&monomerid=429369&enzyme=3C-like+proteinase+%283CL-PRO%29&column=ki&startPg=0&Increment=50&submit=Search	154732785
868779	CC(OC(C)(C)C)[C@H](NC(=O)OCc1ccccc1)C(=O)C[C@@H](CC1CCCCC1)C(=O)N[C@@H](C[C@@H]1CCNC1=O)C=O	YRSRMMHQVRDGEU-NMVJGCILSA-N	med.21724, Compound 41	3C-like proteinase (3CL-PRO)	Human SARS coronavirus	53				10.1002/med.21724	http://www.bindingdb.org/jsp/dbsearch/PrimarySearch_ki.jsp?energyterm=kJ/mole&tag=r21&monomerid=429370&enzyme=3C-like+proteinase+%283CL-PRO%29&column=ki&startPg=0&Increment=50&submit=Search	154732786
868781	Brc1cccc(\C=C\C(=O)N[C@@H](Cc2ccccc2)C(=O)N[C@@H](C[C@@H]2CCNC2=O)C=O)c1	IDHUSOHEXWRKIE-LPCYXGDASA-N	med.21724, Compound 42	3C-like proteinase (3CL-PRO)	Human SARS coronavirus		700			10.1002/med.21724	http://www.bindingdb.org/jsp/dbsearch/PrimarySearch_ki.jsp?energyterm=kJ/mole&tag=r21&monomerid=429371&enzyme=3C-like+proteinase+%283CL-PRO%29&column=ki&startPg=0&Increment=50&submit=Search	154732787
868783	Fc1cc(Cl)ccc1\C=C\C(=O)N[C@@H](Cc1ccccc1)C(=O)N[C@@H](C[C@@H]1CCNC1=O)C=O	HXAHMXYAYHWWRI-ZCTWNQIISA-N	MPI2::med.21724, Compound 43	3C-like proteinase (3CL-PRO)	Human SARS coronavirus		200			10.1002/med.21724	http://www.bindingdb.org/jsp/dbsearch/PrimarySearch_ki.jsp?energyterm=kJ/mole&tag=r21&monomerid=429372&enzyme=3C-like+proteinase+%283CL-PRO%29&column=ki&startPg=0&Increment=50&submit=Search	44578386
868785	CC(C)C[C@H](NC(=O)[C@@H](NC(=O)[C@H](C)NC(=O)[C@H](CO)NC(C)=O)C(C)C)C(=O)N[C@@H](CCC(=O)N(C)C)C=O	SYPDBXVHHYPEDE-OYJIISJGSA-N	CHEMBL479724::med.21724, Compound 44	3C-like proteinase (3CL-PRO)	Human SARS coronavirus		37000			10.1002/med.21724	http://www.bindingdb.org/jsp/dbsearch/PrimarySearch_ki.jsp?energyterm=kJ/mole&tag=r21&monomerid=50484479&enzyme=3C-like+proteinase+%283CL-PRO%29&column=ki&startPg=0&Increment=50&submit=Search	44590140
868786	CC(C)C[C@H](NC(=O)[C@@H](NC(=O)[C@H](C)NC(=O)[C@H](CO)NC(C)=O)C(C)C)C(=O)N[C@@H](Cc1c[nH]cn1)C=O	AEYIBAPLFDNVGD-JMMIECQRSA-N	CHEMBL1929017::med.21724, Compound 45	3C-like proteinase (3CL-PRO)	Human SARS coronavirus		5700			10.1002/med.21724	http://www.bindingdb.org/jsp/dbsearch/PrimarySearch_ki.jsp?energyterm=kJ/mole&tag=r21&monomerid=50484482&enzyme=3C-like+proteinase+%283CL-PRO%29&column=ki&startPg=0&Increment=50&submit=Search	54592395
868787	C[C@H](NC(=O)[C@H](CO)NC(C)=O)C(=O)N[C@@H](C1CCCCC1)C(=O)N[C@@H](Cc1c[nH]cn1)C=O	YYWLEUZAMQWYRU-VKOGCVSHSA-N	med.21724, Compound 46	3C-like proteinase (3CL-PRO)	Human SARS coronavirus		98			10.1002/med.21724	http://www.bindingdb.org/jsp/dbsearch/PrimarySearch_ki.jsp?energyterm=kJ/mole&tag=r21&monomerid=429375&enzyme=3C-like+proteinase+%283CL-PRO%29&column=ki&startPg=0&Increment=50&submit=Search	154732788
868788	O=C[C@H](Cc1c[nH]cn1)NC[C@@H]1C[C@@H]2CCCC[C@H]2CN1C(=O)c1ccc(cc1)-c1ccccc1	VZCULZJNALRGNB-XEZODYMFSA-N	med.21724, Compound 47	3C-like proteinase (3CL-PRO)	Human SARS coronavirus		108000			10.1002/med.21724	http://www.bindingdb.org/jsp/dbsearch/PrimarySearch_ki.jsp?energyterm=kJ/mole&tag=r21&monomerid=429376&enzyme=3C-like+proteinase+%283CL-PRO%29&column=ki&startPg=0&Increment=50&submit=Search	87057577
868789	O=C[C@H](Cc1c[nH]cn1)NC[C@@H]1C[C@@H]2CCCC[C@H]2CN1C(=O)c1ccccc1	AMCCGTGZJQOWFV-LGGPRVQUSA-N	med.21724, Compound 48	3C-like proteinase (3CL-PRO)	Human SARS coronavirus		68000			10.1002/med.21724	http://www.bindingdb.org/jsp/dbsearch/PrimarySearch_ki.jsp?energyterm=kJ/mole&tag=r21&monomerid=429377&enzyme=3C-like+proteinase+%283CL-PRO%29&column=ki&startPg=0&Increment=50&submit=Search	154732789
868790	Brc1ccc(cc1)C(=O)N1C[C@@H]2CCCC[C@H]2C[C@H]1CN[C@@H](Cc1c[nH]cn1)C=O	SKLHMRHVVDDIOX-GPHNJDIKSA-N	med.21724, Compound 49	3C-like proteinase (3CL-PRO)	Human SARS coronavirus		63000			10.1002/med.21724	http://www.bindingdb.org/jsp/dbsearch/PrimarySearch_ki.jsp?energyterm=kJ/mole&tag=r21&monomerid=429378&enzyme=3C-like+proteinase+%283CL-PRO%29&column=ki&startPg=0&Increment=50&submit=Search	154732790
868791	O=C[C@H](Cc1c[nH]cn1)NC[C@H]1C[C@H]2CCCC[C@@H]2CN1C(=O)c1ccc(cc1)-c1ccccc1	VZCULZJNALRGNB-QKBZBAIHSA-N	med.21724, Compound 50	3C-like proteinase (3CL-PRO)	Human SARS coronavirus		240000			10.1002/med.21724	http://www.bindingdb.org/jsp/dbsearch/PrimarySearch_ki.jsp?energyterm=kJ/mole&tag=r21&monomerid=429379&enzyme=3C-like+proteinase+%283CL-PRO%29&column=ki&startPg=0&Increment=50&submit=Search	154732791
868792	Brc1ccc(cc1)C(=O)N1C[C@H]2CCCC[C@@H]2C[C@@H]1CN[C@@H](Cc1c[nH]cn1)C=O	SKLHMRHVVDDIOX-RPHTVSPISA-N	med.21724, Compound 51	3C-like proteinase (3CL-PRO)	Human SARS coronavirus		175000			10.1002/med.21724	http://www.bindingdb.org/jsp/dbsearch/PrimarySearch_ki.jsp?energyterm=kJ/mole&tag=r21&monomerid=429380&enzyme=3C-like+proteinase+%283CL-PRO%29&column=ki&startPg=0&Increment=50&submit=Search	154732792
868793	CC(O)[C@@H](NC(C)=O)C(=O)NCC(=O)NC1CCC[C@H]2CN([C@H](CN[C@@H](Cc3c[nH]cn3)C=O)C[C@H]12)C(=O)c1ccc(Br)cc1	JIDBTSDFAPUELH-JSHDPTJHSA-N	med.21724, Compound 52	3C-like proteinase (3CL-PRO)	Human SARS coronavirus		26000			10.1002/med.21724	http://www.bindingdb.org/jsp/dbsearch/PrimarySearch_ki.jsp?energyterm=kJ/mole&tag=r21&monomerid=429381&enzyme=3C-like+proteinase+%283CL-PRO%29&column=ki&startPg=0&Increment=50&submit=Search	154732793
868794	CCCCN(C)C[C@H]1O[C@@H](CN[C@@H](Cc2c[nH]cn2)C=O)C[C@H]2CCCC[C@H]12	XTDYRRXAUUTJAL-KMKNWIINSA-N	med.21724, Compound 53	3C-like proteinase (3CL-PRO)	Human SARS coronavirus		260000			10.1002/med.21724	http://www.bindingdb.org/jsp/dbsearch/PrimarySearch_ki.jsp?energyterm=kJ/mole&tag=r21&monomerid=429382&enzyme=3C-like+proteinase+%283CL-PRO%29&column=ki&startPg=0&Increment=50&submit=Search	154732794
868795	CCCCN(C)C[C@H]1O[C@H](CN[C@@H](Cc2c[nH]cn2)C=O)C[C@H]2CCCC[C@H]12	XTDYRRXAUUTJAL-ZQOQTTQJSA-N	med.21724, Compound 54	3C-like proteinase (3CL-PRO)	Human SARS coronavirus		95000			10.1002/med.21724	http://www.bindingdb.org/jsp/dbsearch/PrimarySearch_ki.jsp?energyterm=kJ/mole&tag=r21&monomerid=429383&enzyme=3C-like+proteinase+%283CL-PRO%29&column=ki&startPg=0&Increment=50&submit=Search	154732795
868796	CCCCN(C)C[C@@H]1O[C@@H](CN[C@@H](Cc2c[nH]cn2)C=O)C[C@H]2CCCC[C@H]12	XTDYRRXAUUTJAL-YYDGMXKLSA-N	med.21724, Compound 55	3C-like proteinase (3CL-PRO)	Human SARS coronavirus		780000			10.1002/med.21724	http://www.bindingdb.org/jsp/dbsearch/PrimarySearch_ki.jsp?energyterm=kJ/mole&tag=r21&monomerid=429384&enzyme=3C-like+proteinase+%283CL-PRO%29&column=ki&startPg=0&Increment=50&submit=Search	154732796
868797	CCCCN(C)C[C@@H]1O[C@H](CN[C@@H](Cc2c[nH]cn2)C=O)C[C@H]2CCCC[C@H]12	XTDYRRXAUUTJAL-AMGKQAFBSA-N	med.21724, Compound 56	3C-like proteinase (3CL-PRO)	Human SARS coronavirus		440000			10.1002/med.21724	http://www.bindingdb.org/jsp/dbsearch/PrimarySearch_ki.jsp?energyterm=kJ/mole&tag=r21&monomerid=429385&enzyme=3C-like+proteinase+%283CL-PRO%29&column=ki&startPg=0&Increment=50&submit=Search	154732797
868798	CC(C)C[C@@H](NC(=O)OCc1ccccc1)C(=O)N[C@H](CC1CCNC1=O)C(O)S([O-])(=O)=O	BSPZFJDYQHDZNR-MUZJZNNISA-M	BDBM429386::GC376	3C-like proteinase (3CL-PRO)	Human SARS coronavirus				9000	10.1002/med.21724	http://www.bindingdb.org/jsp/dbsearch/PrimarySearch_ki.jsp?energyterm=kJ/mole&tag=r21&monomerid=419133&enzyme=3C-like+proteinase+%283CL-PRO%29&column=ki&startPg=0&Increment=50&submit=Search	154732798
868801	CC(C)C[C@H](NC(=O)OC1CCN(CC1)C(=O)OC(C)(C)C)C(=O)N[C@@H](C[C@@H]1CCNC1=O)C(O)S([O-])(=O)=O	AVMDEKFUKVZQPM-PIJSLZJWSA-M	med.21724, Compound 58	3C-like proteinase (3CL-PRO)	Human SARS coronavirus		5100			10.1002/med.21724	http://www.bindingdb.org/jsp/dbsearch/PrimarySearch_ki.jsp?energyterm=kJ/mole&tag=r21&monomerid=429387&enzyme=3C-like+proteinase+%283CL-PRO%29&column=ki&startPg=0&Increment=50&submit=Search	154732799
868804	CC(C)C[C@H](NC(=O)OC1(Cc2ccccc2)CCN(CC1)C(=O)OC(C)(C)C)C(=O)N[C@@H](C[C@@H]1CCNC1=O)C(O)S([O-])(=O)=O	PJEUBFINPIVQHS-DKJNXQLESA-M	med.21724, Compound 59	3C-like proteinase (3CL-PRO)	Human SARS coronavirus		6300			10.1002/med.21724	http://www.bindingdb.org/jsp/dbsearch/PrimarySearch_ki.jsp?energyterm=kJ/mole&tag=r21&monomerid=429388&enzyme=3C-like+proteinase+%283CL-PRO%29&column=ki&startPg=0&Increment=50&submit=Search	154732800
868809	O=C(N[C@@H](Cc1ccccc1)C(=O)N[C@@H](C[C@@H]1CCNC1=O)C(=O)C(=O)NCc1ccccc1)\C=C\c1ccccc1	MYYPGCLXUFVQGN-FIVJMQNTSA-N	med.21724, Compound 63	3C-like proteinase (3CL-PRO)	Human SARS coronavirus		1950			10.1002/med.21724	http://www.bindingdb.org/jsp/dbsearch/PrimarySearch_ki.jsp?energyterm=kJ/mole&tag=r21&monomerid=429391&enzyme=3C-like+proteinase+%283CL-PRO%29&column=ki&startPg=0&Increment=50&submit=Search	127031070
868810	O=C(N[C@@H](CC1CCCCC1)C(=O)N[C@@H](C[C@@H]1CCNC1=O)C(=O)C(=O)NCc1ccccc1)\C=C\c1ccccc1	QTGORSKTHIBLJT-FIVJMQNTSA-N	alpha-ketoamide inhibitor 11r::med.21724, Compound 64	3C-like proteinase (3CL-PRO)	Human SARS coronavirus		710			10.1002/med.21724	http://www.bindingdb.org/jsp/dbsearch/PrimarySearch_ki.jsp?energyterm=kJ/mole&tag=r21&monomerid=420283&enzyme=3C-like+proteinase+%283CL-PRO%29&column=ki&startPg=0&Increment=50&submit=Search
868812	O=C(N[C@@H](CC1CCCC1)C(=O)N[C@@H](C[C@@H]1CCNC1=O)C(=O)C(=O)NCc1ccccc1)\C=C\c1ccccc1	WKUXHSLNRCEEER-XBVLGBTFSA-N	med.21724, Compound 65	3C-like proteinase (3CL-PRO)	Human SARS coronavirus		710			10.1002/med.21724	http://www.bindingdb.org/jsp/dbsearch/PrimarySearch_ki.jsp?energyterm=kJ/mole&tag=r21&monomerid=429393&enzyme=3C-like+proteinase+%283CL-PRO%29&column=ki&startPg=0&Increment=50&submit=Search	154732801
868815	CC(C)(C)OC(=O)Nc1cccn([C@@H](CC2CC2)C(=O)N[C@@H](C[C@@H]2CCNC2=O)C(=O)C(=O)NCc2ccccc2)c1=O	NLVRHQFXQFSBQK-XWGVYQGASA-N	alpha-ketoamide inhibitor 13b::med.21724, Compound 67	3C-like proteinase (3CL-PRO)	Human SARS coronavirus		900			10.1002/med.21724	http://www.bindingdb.org/jsp/dbsearch/PrimarySearch_ki.jsp?energyterm=kJ/mole&tag=r21&monomerid=420295&enzyme=3C-like+proteinase+%283CL-PRO%29&column=ki&startPg=0&Increment=50&submit=Search
868817	CC(C)(C)OC(=O)Nc1cccn([C@@H](CC2CC2)C(=O)N[C@@H](C[C@@H]2CCNC2=O)C(=O)C(=O)NCc2ccccc2)c1=O	NLVRHQFXQFSBQK-XWGVYQGASA-N	alpha-ketoamide inhibitor 13b::med.21724, Compound 67	3C-like proteinase (3CL-PRO)	Human SARS coronavirus				1750	10.1002/med.21724	http://www.bindingdb.org/jsp/dbsearch/PrimarySearch_ki.jsp?energyterm=kJ/mole&tag=r21&monomerid=420295&enzyme=3C-like+proteinase+%283CL-PRO%29&column=ki&startPg=0&Increment=50&submit=Search
868819	CC(C)C[C@H](NC(=O)[C@@H](NC(=O)OCc1ccccc1)C(C)C)C(=O)N[C@@H](CCC(O)=O)C(=O)C(F)(F)F	YLUXVNBHWOCFLK-BJLQDIEVSA-N	CHEMBL551569::med.21724, Compound 69	3C-like proteinase (3CL-PRO)	Human SARS coronavirus	116000				10.1002/med.21724	http://www.bindingdb.org/jsp/dbsearch/PrimarySearch_ki.jsp?energyterm=kJ/mole&tag=r21&monomerid=50480487&enzyme=3C-like+proteinase+%283CL-PRO%29&column=ki&startPg=0&Increment=50&submit=Search	16085283
868820	CC(C)C[C@H](NC(=O)[C@@H](NC(=O)OCc1ccccc1)C(C)C)C(=O)N[C@@H](CCC(=O)N1CCOCC1)C(=O)C(F)(F)F	FJHQYYMVIUHRDC-FIXSFTCYSA-N	CHEMBL555061::med.21724, Compound 70	3C-like proteinase (3CL-PRO)	Human SARS coronavirus	2200				10.1002/med.21724	http://www.bindingdb.org/jsp/dbsearch/PrimarySearch_ki.jsp?energyterm=kJ/mole&tag=r21&monomerid=50480488&enzyme=3C-like+proteinase+%283CL-PRO%29&column=ki&startPg=0&Increment=50&submit=Search	45269761
868821	CC(C)C[C@H](NC(=O)[C@@H](NC(=O)OCc1cccc(c1)N(C)C)C(C)C)C(=O)N[C@@H](C[C@@H]1CCNC1=O)C(=O)c1nc2ccccc2s1	GWBXIKYLRCLTAU-SINPBGNNSA-N	jm5b01461, Compound 60	3C-like proteinase (3CL-PRO)	Human SARS coronavirus	3.00				10.1002/med.21724	http://www.bindingdb.org/jsp/dbsearch/PrimarySearch_ki.jsp?energyterm=kJ/mole&tag=r21&monomerid=429243&enzyme=3C-like+proteinase+%283CL-PRO%29&column=ki&startPg=0&Increment=50&submit=Search	154732711
868822	COc1cccc(NCC(=O)N[C@@H](CC(C)C)C(=O)N[C@@H](C[C@@H]2CCNC2=O)C(=O)c2nc3ccccc3s2)c1	REYMLCFMQQQRLG-TZYHBYERSA-N	med.21724, Compound 72	3C-like proteinase (3CL-PRO)	Human SARS coronavirus	390				10.1002/med.21724	http://www.bindingdb.org/jsp/dbsearch/PrimarySearch_ki.jsp?energyterm=kJ/mole&tag=r21&monomerid=429399&enzyme=3C-like+proteinase+%283CL-PRO%29&column=ki&startPg=0&Increment=50&submit=Search	71739982
868823	COc1cccc2[nH]c(cc12)C(=O)N[C@@H](CC(C)C)C(=O)N[C@@H](C[C@@H]1CCNC1=O)C(=O)c1nc2ccccc2s1	JBLLRCOZJMVOAE-HSQYWUDLSA-N	jm5b01461, Compound 59	3C-like proteinase (3CL-PRO)	Human SARS coronavirus	6.00				10.1002/med.21724	http://www.bindingdb.org/jsp/dbsearch/PrimarySearch_ki.jsp?energyterm=kJ/mole&tag=r21&monomerid=429242&enzyme=3C-like+proteinase+%283CL-PRO%29&column=ki&startPg=0&Increment=50&submit=Search	72708377
868824	CC(C)C[C@H](NC(=O)[C@@H](NC(=O)[C@H](C)NC(=O)OCc1ccccc1)C(C)C)C(=O)N[C@@H](Cc1ccccc1)C(=O)C(F)(F)F	PDLFIYNGGUUVLF-PZYJALBSSA-N	jm5b01461, Compound 61	3C-like proteinase (3CL-PRO)	Human SARS coronavirus	300				10.1002/med.21724	http://www.bindingdb.org/jsp/dbsearch/PrimarySearch_ki.jsp?energyterm=kJ/mole&tag=r21&monomerid=429244&enzyme=3C-like+proteinase+%283CL-PRO%29&column=ki&startPg=0&Increment=50&submit=Search	73350244
868825	CC(C)C[C@H](NC(=O)[C@@H](NC(=O)[C@H](C)NC(=O)OCc1ccccc1)C(C)C)C(=O)N[C@@H](Cc1ccccc1)C(=O)C(F)(F)F	PDLFIYNGGUUVLF-PZYJALBSSA-N	jm5b01461, Compound 61	3C-like proteinase (3CL-PRO)	Human SARS coronavirus		10000			10.1002/med.21724	http://www.bindingdb.org/jsp/dbsearch/PrimarySearch_ki.jsp?energyterm=kJ/mole&tag=r21&monomerid=429244&enzyme=3C-like+proteinase+%283CL-PRO%29&column=ki&startPg=0&Increment=50&submit=Search	73350244
868826	CC(C)C[C@H](NC(=O)OCc1ccccc1)C(=O)N[C@@H](CCC(=O)N(C)C)C(=O)CF	UBPKJZUVHMCXAZ-ROUUACIJSA-N	jm5b01461, Compound 49	3C-like proteinase (3CL-PRO)	Human SARS coronavirus				10000	10.1002/med.21724	http://www.bindingdb.org/jsp/dbsearch/PrimarySearch_ki.jsp?energyterm=kJ/mole&tag=r21&monomerid=429138&enzyme=3C-like+proteinase+%283CL-PRO%29&column=ki&startPg=0&Increment=50&submit=Search	11561189
868827	Oc1ccc(Cl)cc1C(=O)Nc1ccc(cc1Cl)[N+]([O-])=O	RJMUSRYZPJIFPJ-UHFFFAOYSA-N	5-chloro-N-(2-chloro-4-nitrophenyl)-2-hydroxybenzamide::med.21724, Compound 76::niclosamide	3C-like proteinase (3CL-PRO)	Human SARS coronavirus		>50000			10.1002/med.21724	http://www.bindingdb.org/jsp/dbsearch/PrimarySearch_ki.jsp?energyterm=kJ/mole&tag=r21&monomerid=11242&enzyme=3C-like+proteinase+%283CL-PRO%29&column=ki&startPg=0&Increment=50&submit=Search	4477		DB06803	ZINC03874496
868828	CN(C)c1ccc(cc1)C(=O)N[C@@H](Cc1ccccc1)C(=O)Nc1ccc(cc1Cl)[N+]([O-])=O	NBBWJEWPUKPHPZ-QFIPXVFZSA-N	(2S)-N-(2-chloro-4-nitrophenyl)-2-{[4-(dimethylamino)phenyl]formamido}-3-phenylpropanamide::Anilide Inhibitor 2a::N-(2-chloro-4-nitrophenyl)-N-[4-(dimethylamino)benzoyl]-L-phenylalaninamide::med.21724, Compound 77	3C-like proteinase (3CL-PRO)	Human SARS coronavirus		60			10.1002/med.21724	http://www.bindingdb.org/jsp/dbsearch/PrimarySearch_ki.jsp?energyterm=kJ/mole&tag=r21&monomerid=11234&enzyme=3C-like+proteinase+%283CL-PRO%29&column=ki&startPg=0&Increment=50&submit=Search	11317290			ZINC13646492
868829	CN(C)c1ccc(cc1)C(=O)N[C@@H](Cc1ccccc1)C(=O)Nc1ccccc1Cl	BLVKWTTVQWKNFW-QFIPXVFZSA-N	jm5b01461, Compound 35	3C-like proteinase (3CL-PRO)	Human SARS coronavirus		>10000			10.1002/med.21724	http://www.bindingdb.org/jsp/dbsearch/PrimarySearch_ki.jsp?energyterm=kJ/mole&tag=r21&monomerid=429085&enzyme=3C-like+proteinase+%283CL-PRO%29&column=ki&startPg=0&Increment=50&submit=Search	11258716
868830	CN(C)c1ccc(cc1)C(=O)N[C@@H](Cc1ccccc1)C(=O)Nc1ccc(cc1)[N+]([O-])=O	IWQFYHUNPNJZET-QFIPXVFZSA-N	jm5b01461, Compound 33	3C-like proteinase (3CL-PRO)	Human SARS coronavirus		>10000			10.1002/med.21724	http://www.bindingdb.org/jsp/dbsearch/PrimarySearch_ki.jsp?energyterm=kJ/mole&tag=r21&monomerid=429083&enzyme=3C-like+proteinase+%283CL-PRO%29&column=ki&startPg=0&Increment=50&submit=Search	11430407
868831	[O-][N+](=O)c1ccc(NC(=O)[C@H](Cc2ccccc2)NC(=O)c2ccccc2)c(Cl)c1	FXDVSEXSZHQYNI-FQEVSTJZSA-N	jm5b01461, Compound 30	3C-like proteinase (3CL-PRO)	Human SARS coronavirus		>10000			10.1002/med.21724	http://www.bindingdb.org/jsp/dbsearch/PrimarySearch_ki.jsp?energyterm=kJ/mole&tag=r21&monomerid=429077&enzyme=3C-like+proteinase+%283CL-PRO%29&column=ki&startPg=0&Increment=50&submit=Search	11189425
868832	CC(C)C[C@H](NC(=O)[C@@H](NC(=O)[C@@H](NC(C)=O)C(C)C)C(C)OCc1ccccc1)C(=O)N[C@@H](C[C@@H]1CCNC1=O)C(=O)Cn1[nH]c(=O)c2ccccc2c1=O	WVCBNUTYVOLXDN-JTKKLOFZSA-N	med.21724, Compound 81	3C-like proteinase (3CL-PRO)	Human SARS coronavirus		2700			10.1002/med.21724	http://www.bindingdb.org/jsp/dbsearch/PrimarySearch_ki.jsp?energyterm=kJ/mole&tag=r21&monomerid=429408&enzyme=3C-like+proteinase+%283CL-PRO%29&column=ki&startPg=0&Increment=50&submit=Search	154732803
868833	CC(C)C[C@H](NC(=O)[C@@H](NC(=O)[C@@H](NC(C)=O)C(C)C)C(C)O)C(=O)N[C@@H](C[C@@H]1CCNC1=O)C(=O)Cn1[nH]c(=O)c2ccccc2c1=O	OJHHBYMVWJMTGA-YAAAGTRMSA-N	med.21724, Compound 82	3C-like proteinase (3CL-PRO)	Human SARS coronavirus		2900			10.1002/med.21724	http://www.bindingdb.org/jsp/dbsearch/PrimarySearch_ki.jsp?energyterm=kJ/mole&tag=r21&monomerid=429409&enzyme=3C-like+proteinase+%283CL-PRO%29&column=ki&startPg=0&Increment=50&submit=Search	154732804
868834	CC(C)C[C@H](NC(=O)[C@@H](NC(=O)[C@@H](NC(C)=O)C(C)C)C(C)OCc1ccccc1)C(=O)N[C@@H](C[C@@H]1CCNC1=O)C(=O)Cn1[nH]c(=O)c2c(cccc2c1=O)[N+]([O-])=O	TYWILPQKGVLDRA-VREIQKLASA-N	med.21724, Compound 83	3C-like proteinase (3CL-PRO)	Human SARS coronavirus		600			10.1002/med.21724	http://www.bindingdb.org/jsp/dbsearch/PrimarySearch_ki.jsp?energyterm=kJ/mole&tag=r21&monomerid=429410&enzyme=3C-like+proteinase+%283CL-PRO%29&column=ki&startPg=0&Increment=50&submit=Search	154732805
868835	CC(C)C[C@H](NC(=O)[C@@H](NC(=O)[C@@H](NC(C)=O)C(C)C)C(C)O)C(=O)N[C@@H](C[C@@H]1CCNC1=O)C(=O)Cn1[nH]c(=O)c2c(cccc2c1=O)[N+]([O-])=O	WLFJZNRFNKLNOW-LNSIDSAXSA-N	med.21724, Compound 84	3C-like proteinase (3CL-PRO)	Human SARS coronavirus		3400			10.1002/med.21724	http://www.bindingdb.org/jsp/dbsearch/PrimarySearch_ki.jsp?energyterm=kJ/mole&tag=r21&monomerid=429411&enzyme=3C-like+proteinase+%283CL-PRO%29&column=ki&startPg=0&Increment=50&submit=Search	154732806
868836	O[C@H]([C@H](Cc1ccccc1)NC(=O)OCc1ccccc1)[C@H](O)[C@H](Cc1ccccc1)NC(=O)OCc1ccccc1	VHZZMBIUMSGNBP-GASGPIRDSA-N	med.21724, Compound 85	3C-like proteinase (3CL-PRO)	Human SARS coronavirus	600				10.1002/med.21724	http://www.bindingdb.org/jsp/dbsearch/PrimarySearch_ki.jsp?energyterm=kJ/mole&tag=r21&monomerid=429412&enzyme=3C-like+proteinase+%283CL-PRO%29&column=ki&startPg=0&Increment=50&submit=Search	10393187
868837	O[C@H]([C@H](Cc1c[nH]c2ccccc12)NC(=O)OCc1ccccc1)[C@H](O)[C@H](Cc1c[nH]c2ccccc12)NC(=O)OCc1ccccc1	PEFHEMBSLIFFRC-CLLHQPRTSA-N	jm5b01461, Compound 70	3C-like proteinase (3CL-PRO)	Human SARS coronavirus	340				10.1002/med.21724	http://www.bindingdb.org/jsp/dbsearch/PrimarySearch_ki.jsp?energyterm=kJ/mole&tag=r21&monomerid=429252&enzyme=3C-like+proteinase+%283CL-PRO%29&column=ki&startPg=0&Increment=50&submit=Search	15110210
868838	CC(C)[C@H](NC(=O)[C@H](C)NC(=O)OCc1ccccc1)C(=O)N[C@@H](Cc1c[nH]c2ccccc12)[C@@H](O)[C@H](O)[C@H](Cc1c[nH]c2ccccc12)NC(=O)[C@@H](NC(=O)[C@H](C)NC(=O)OCc1ccccc1)C(C)C	POLUVUUEILGCTM-JWEKRMLRSA-N	jm5b01461, Compound 71	3C-like proteinase (3CL-PRO)	Human SARS coronavirus	73				10.1002/med.21724	http://www.bindingdb.org/jsp/dbsearch/PrimarySearch_ki.jsp?energyterm=kJ/mole&tag=r21&monomerid=429253&enzyme=3C-like+proteinase+%283CL-PRO%29&column=ki&startPg=0&Increment=50&submit=Search	23584956
868839	Nc1ccccc1C(=O)On1nnc2ccccc12	JPKNQONFNZKKLX-UHFFFAOYSA-N	Benzotriazole ester, 3::med.21724, Compound 88	3C-like proteinase (3CL-PRO)	Human SARS coronavirus	20				10.1002/med.21724	http://www.bindingdb.org/jsp/dbsearch/PrimarySearch_ki.jsp?energyterm=kJ/mole&tag=r21&monomerid=59237&enzyme=3C-like+proteinase+%283CL-PRO%29&column=ki&startPg=0&Increment=50&submit=Search	15959235			ZINC59426271
868840	CN(C)c1ccc(cc1)C(=O)On1nnc2ccccc12	UOITWBIZHQLMTH-UHFFFAOYSA-N	Benzotriazole ester, 4::med.21724, Compound 89	3C-like proteinase (3CL-PRO)	Human SARS coronavirus	17				10.1002/med.21724	http://www.bindingdb.org/jsp/dbsearch/PrimarySearch_ki.jsp?energyterm=kJ/mole&tag=r21&monomerid=59238&enzyme=3C-like+proteinase+%283CL-PRO%29&column=ki&startPg=0&Increment=50&submit=Search	15959236			ZINC59426275
868841	O=C(On1nnc2ccccc12)c1ccc2[nH]cnc2c1	ZVXNOBBLRBKRCE-UHFFFAOYSA-N	med.21724, Compound 90	3C-like proteinase (3CL-PRO)	Human SARS coronavirus	23				10.1002/med.21724	http://www.bindingdb.org/jsp/dbsearch/PrimarySearch_ki.jsp?energyterm=kJ/mole&tag=r21&monomerid=429417&enzyme=3C-like+proteinase+%283CL-PRO%29&column=ki&startPg=0&Increment=50&submit=Search	15959239
868842	O=C(On1nnc2ccccc12)c1ccc2[nH]ccc2c1	YPFWNRLSYPAVJB-UHFFFAOYSA-N	Benzotriazole ester, 8::med.21724, Compound 91	3C-like proteinase (3CL-PRO)	Human SARS coronavirus	7.50				10.1002/med.21724	http://www.bindingdb.org/jsp/dbsearch/PrimarySearch_ki.jsp?energyterm=kJ/mole&tag=r21&monomerid=59242&enzyme=3C-like+proteinase+%283CL-PRO%29&column=ki&startPg=0&Increment=50&submit=Search	15959240			ZINC49888654
868843	Clc1cncc(OC(=O)c2cccs2)c1	PAVJYVVZIJTAHT-UHFFFAOYSA-N	jm5b01461, Compound 119	3C-like proteinase (3CL-PRO)	Human SARS coronavirus		500			10.1002/med.21724	http://www.bindingdb.org/jsp/dbsearch/PrimarySearch_ki.jsp?energyterm=kJ/mole&tag=r21&monomerid=429299&enzyme=3C-like+proteinase+%283CL-PRO%29&column=ki&startPg=0&Increment=50&submit=Search	2800278
868844	Clc1cncc(OC(=O)c2ccco2)c1	DWJOEJDGHVXXEB-UHFFFAOYSA-N	(5-chloranylpyridin-3-yl) furan-2-carboxylate::(5-chloropyridin-3-yl) furan-2-carboxylate::2-furancarboxylic acid (5-chloro-3-pyridinyl) ester::5-chloro-3-pyridinyl 2-furoate::CHEMBL222840::MLS000594516::SMR000114552::cid_7230550::furan-2-carboxylic acid (5-chloro-3-pyridyl) ester::med.21724, Compound 93	3C-like proteinase (3CL-PRO)	Human SARS coronavirus		60			10.1002/med.21724	http://www.bindingdb.org/jsp/dbsearch/PrimarySearch_ki.jsp?energyterm=kJ/mole&tag=r21&monomerid=32805&enzyme=3C-like+proteinase+%283CL-PRO%29&column=ki&startPg=0&Increment=50&submit=Search	7230550	CHEMBL222840		ZINC04419293
868845	Clc1cncc(OC(=O)c2cc3ccccc3[nH]2)c1	LJTINUKMKJKLBT-UHFFFAOYSA-N	5-chloro-pyridin-3-yl-1H-indole-2-carboxylate::5-chloropyridin-3-yl 1H-indole-2-carboxylate::CHEMBL225515::med.21724, Compound 94	3C-like proteinase (3CL-PRO)	Human SARS coronavirus		65			10.1002/med.21724	http://www.bindingdb.org/jsp/dbsearch/PrimarySearch_ki.jsp?energyterm=kJ/mole&tag=r21&monomerid=50208939&enzyme=3C-like+proteinase+%283CL-PRO%29&column=ki&startPg=0&Increment=50&submit=Search	16204322	CHEMBL225515		ZINC40585265
868846	Clc1ccc(cc1)-c1ccc(o1)C(=O)Oc1cncc(Cl)c1	UICFGOSRHHZBHZ-UHFFFAOYSA-N	5-chloropyridin-3-yl 5-(4-chlorophenyl)furan-2-carboxylate::5-chloropyridin-3-yl-5-(4-chlorophenyl)furan-2-carboxylate::CHEMBL222769::med.21724, Compound 95	3C-like proteinase (3CL-PRO)	Human SARS coronavirus		63			10.1002/med.21724	http://www.bindingdb.org/jsp/dbsearch/PrimarySearch_ki.jsp?energyterm=kJ/mole&tag=r21&monomerid=50208942&enzyme=3C-like+proteinase+%283CL-PRO%29&column=ki&startPg=0&Increment=50&submit=Search	16203797	CHEMBL222769		ZINC40585026
868847	Clc1cncc(OC(=O)c2cccc3[nH]ccc23)c1	BOSZJNSICHFHMA-UHFFFAOYSA-N	jm5b01461, Compound 124	3C-like proteinase (3CL-PRO)	Human SARS coronavirus		30			10.1002/med.21724	http://www.bindingdb.org/jsp/dbsearch/PrimarySearch_ki.jsp?energyterm=kJ/mole&tag=r21&monomerid=429304&enzyme=3C-like+proteinase+%283CL-PRO%29&column=ki&startPg=0&Increment=50&submit=Search	25110701
868848	Clc1cncc(OC(=O)c2cccc3[nH]ccc23)c1	BOSZJNSICHFHMA-UHFFFAOYSA-N	jm5b01461, Compound 124	3C-like proteinase (3CL-PRO)	Human SARS coronavirus				6900	10.1002/med.21724	http://www.bindingdb.org/jsp/dbsearch/PrimarySearch_ki.jsp?energyterm=kJ/mole&tag=r21&monomerid=429304&enzyme=3C-like+proteinase+%283CL-PRO%29&column=ki&startPg=0&Increment=50&submit=Search	25110701
868849	Clc1cncc(OC(=O)c2ccc3[nH]ccc3c2)c1	TYLOEMFGLQBHPE-UHFFFAOYSA-N	jm5b01461, Compound 126	3C-like proteinase (3CL-PRO)	Human SARS coronavirus		310			10.1002/med.21724	http://www.bindingdb.org/jsp/dbsearch/PrimarySearch_ki.jsp?energyterm=kJ/mole&tag=r21&monomerid=429306&enzyme=3C-like+proteinase+%283CL-PRO%29&column=ki&startPg=0&Increment=50&submit=Search	16204004
868850	Clc1cncc(OC(=O)c2ccc3[nH]ccc3c2)c1	TYLOEMFGLQBHPE-UHFFFAOYSA-N	jm5b01461, Compound 126	3C-like proteinase (3CL-PRO)	Human SARS coronavirus				24000	10.1002/med.21724	http://www.bindingdb.org/jsp/dbsearch/PrimarySearch_ki.jsp?energyterm=kJ/mole&tag=r21&monomerid=429306&enzyme=3C-like+proteinase+%283CL-PRO%29&column=ki&startPg=0&Increment=50&submit=Search	16204004
868851	Clc1cncc(OC(=O)c2ccc3cc[nH]c3c2)c1	OPNCFNLNJUPFKN-UHFFFAOYSA-N	med.21724, Compound 98	3C-like proteinase (3CL-PRO)	Human SARS coronavirus		230			10.1002/med.21724	http://www.bindingdb.org/jsp/dbsearch/PrimarySearch_ki.jsp?energyterm=kJ/mole&tag=r21&monomerid=429425&enzyme=3C-like+proteinase+%283CL-PRO%29&column=ki&startPg=0&Increment=50&submit=Search	44580739
868852	Clc1cncc(OC(=O)c2ccc3cc[nH]c3c2)c1	OPNCFNLNJUPFKN-UHFFFAOYSA-N	med.21724, Compound 98	3C-like proteinase (3CL-PRO)	Human SARS coronavirus				>25000	10.1002/med.21724	http://www.bindingdb.org/jsp/dbsearch/PrimarySearch_ki.jsp?energyterm=kJ/mole&tag=r21&monomerid=429425&enzyme=3C-like+proteinase+%283CL-PRO%29&column=ki&startPg=0&Increment=50&submit=Search	44580739
868853	Clc1cncc(OC(=O)c2cccc3cc[nH]c23)c1	FDPMNGSSFLFBSI-UHFFFAOYSA-N	med.21724, Compound 99	3C-like proteinase (3CL-PRO)	Human SARS coronavirus		80			10.1002/med.21724	http://www.bindingdb.org/jsp/dbsearch/PrimarySearch_ki.jsp?energyterm=kJ/mole&tag=r21&monomerid=429426&enzyme=3C-like+proteinase+%283CL-PRO%29&column=ki&startPg=0&Increment=50&submit=Search	44580152
868854	Clc1cncc(OC(=O)c2cccc3cc[nH]c23)c1	FDPMNGSSFLFBSI-UHFFFAOYSA-N	med.21724, Compound 99	3C-like proteinase (3CL-PRO)	Human SARS coronavirus				12100	10.1002/med.21724	http://www.bindingdb.org/jsp/dbsearch/PrimarySearch_ki.jsp?energyterm=kJ/mole&tag=r21&monomerid=429426&enzyme=3C-like+proteinase+%283CL-PRO%29&column=ki&startPg=0&Increment=50&submit=Search	44580152
868855	Cc1ccc(cc1)S(=O)(=O)n1ccc2cc(ccc12)C(=O)Oc1cncc(Cl)c1	SXUXZAGERSBZTC-UHFFFAOYSA-N	med.21724, Compound 100	3C-like proteinase (3CL-PRO)	Human SARS coronavirus		310			10.1002/med.21724	http://www.bindingdb.org/jsp/dbsearch/PrimarySearch_ki.jsp?energyterm=kJ/mole&tag=r21&monomerid=429427&enzyme=3C-like+proteinase+%283CL-PRO%29&column=ki&startPg=0&Increment=50&submit=Search	44580737
868856	Cc1ccc(cc1)S(=O)(=O)n1ccc2cc(ccc12)C(=O)Oc1cncc(Cl)c1	SXUXZAGERSBZTC-UHFFFAOYSA-N	med.21724, Compound 100	3C-like proteinase (3CL-PRO)	Human SARS coronavirus				24000	10.1002/med.21724	http://www.bindingdb.org/jsp/dbsearch/PrimarySearch_ki.jsp?energyterm=kJ/mole&tag=r21&monomerid=429427&enzyme=3C-like+proteinase+%283CL-PRO%29&column=ki&startPg=0&Increment=50&submit=Search	44580737
868857	Clc1ccc(cc1)-c1ccc(o1)C(=O)Cc1cncc(Br)c1	UEDKJQAQOOLPEW-UHFFFAOYSA-N	med.21724, Compound 101	3C-like proteinase (3CL-PRO)	Human SARS coronavirus		13000			10.1002/med.21724	http://www.bindingdb.org/jsp/dbsearch/PrimarySearch_ki.jsp?energyterm=kJ/mole&tag=r21&monomerid=429428&enzyme=3C-like+proteinase+%283CL-PRO%29&column=ki&startPg=0&Increment=50&submit=Search	25147562
868858	FC(C(=O)c1ccc(o1)-c1ccc(Cl)cc1)c1cncc(Br)c1	ONFKSIAIGJJXER-UHFFFAOYSA-N	med.21724, Compound 102	3C-like proteinase (3CL-PRO)	Human SARS coronavirus		28000			10.1002/med.21724	http://www.bindingdb.org/jsp/dbsearch/PrimarySearch_ki.jsp?energyterm=kJ/mole&tag=r21&monomerid=429429&enzyme=3C-like+proteinase+%283CL-PRO%29&column=ki&startPg=0&Increment=50&submit=Search	25147563
868859	FC(F)(C(=O)c1ccc(o1)-c1ccc(Cl)cc1)c1cncc(Br)c1	FIPFNIFTFHQBDR-UHFFFAOYSA-N	med.21724, Compound 103	3C-like proteinase (3CL-PRO)	Human SARS coronavirus		57000			10.1002/med.21724	http://www.bindingdb.org/jsp/dbsearch/PrimarySearch_ki.jsp?energyterm=kJ/mole&tag=r21&monomerid=429430&enzyme=3C-like+proteinase+%283CL-PRO%29&column=ki&startPg=0&Increment=50&submit=Search	154732807
868860	CCC(=C)C(=O)c1ccc(OCC(=O)NC(=O)OC(C)(C)C)c(Cl)c1Cl	FZROVKDRBUVJGC-UHFFFAOYSA-N	jm5b01461, Compound 73	3C-like proteinase (3CL-PRO)	Human SARS coronavirus	45800				10.1002/med.21724	http://www.bindingdb.org/jsp/dbsearch/PrimarySearch_ki.jsp?energyterm=kJ/mole&tag=r21&monomerid=429255&enzyme=3C-like+proteinase+%283CL-PRO%29&column=ki&startPg=0&Increment=50&submit=Search	154732717
868861	CCC(=C)C(=O)c1ccc(OCC(=O)NC(=O)OC(C)(C)C(N)=O)c(Cl)c1Cl	WYDGCJTUSQAGJG-UHFFFAOYSA-N	jm5b01461, Compound 74	3C-like proteinase (3CL-PRO)	Human SARS coronavirus	35300				10.1002/med.21724	http://www.bindingdb.org/jsp/dbsearch/PrimarySearch_ki.jsp?energyterm=kJ/mole&tag=r21&monomerid=429256&enzyme=3C-like+proteinase+%283CL-PRO%29&column=ki&startPg=0&Increment=50&submit=Search	154732718
868862	Ic1ccc2N(Cc3cc4ccccc4s3)C(=O)C(=O)c2c1	MAYSJMBSILUGEG-UHFFFAOYSA-N	1-Benzo[b]thiophen-2-ylmethyl-5-iodo-1H-indole-2,3-dione::CHEMBL190743::med.21724, Compound 106	3C-like proteinase (3CL-PRO)	Human SARS coronavirus		950			10.1002/med.21724	http://www.bindingdb.org/jsp/dbsearch/PrimarySearch_ki.jsp?energyterm=kJ/mole&tag=r21&monomerid=50167307&enzyme=3C-like+proteinase+%283CL-PRO%29&column=ki&startPg=0&Increment=50&submit=Search	11796320	CHEMBL190743		ZINC28466529
868863	Brc1cccc2C(=O)C(=O)N(Cc3cc4ccccc4s3)c12	UFOWXDUBQLPEOX-UHFFFAOYSA-N	1-Benzo[b]thiophen-2-ylmethyl-7-bromo-1H-indole-2,3-dione::CHEMBL365134::med.21724, Compound 107	3C-like proteinase (3CL-PRO)	Human SARS coronavirus		980			10.1002/med.21724	http://www.bindingdb.org/jsp/dbsearch/PrimarySearch_ki.jsp?energyterm=kJ/mole&tag=r21&monomerid=50167309&enzyme=3C-like+proteinase+%283CL-PRO%29&column=ki&startPg=0&Increment=50&submit=Search	11667869	CHEMBL365134		ZINC28465712
868864	NC(=O)c1ccc2N(Cc3ccc4ccccc4c3)C(=O)C(=O)c2c1	NTNYHMJYSGPGCQ-UHFFFAOYSA-N	1-(2-naphthlmethyl) isatin-5-carboxamide::1-Naphthalen-2-ylmethyl-2,3-dioxo-2,3-dihydro-1H-indole-5-carboxylic acid amide::CHEMBL358279::med.21724, Compound 108	3C-like proteinase (3CL-PRO)	Human SARS coronavirus		370			10.1002/med.21724	http://www.bindingdb.org/jsp/dbsearch/PrimarySearch_ki.jsp?energyterm=kJ/mole&tag=r21&monomerid=50055218&enzyme=3C-like+proteinase+%283CL-PRO%29&column=ki&startPg=0&Increment=50&submit=Search	515964	CHEMBL358279		ZINC03590592
868865	CC1CCN(CC1)S(=O)(=O)c1ccc2N(Cc3ccccc3)C(=O)C(=O)c2c1	FXEKOZSZGNWFIV-UHFFFAOYSA-N	CHEMBL3099527::med.21724, Compound 109	3C-like proteinase (3CL-PRO)	Human SARS coronavirus		1040			10.1002/med.21724	http://www.bindingdb.org/jsp/dbsearch/PrimarySearch_ki.jsp?energyterm=kJ/mole&tag=r21&monomerid=50495009&enzyme=3C-like+proteinase+%283CL-PRO%29&column=ki&startPg=0&Increment=50&submit=Search	73057090
868866	OC(=O)c1cc(Br)ccc1-c1ccc(\C=C2\C(=O)NN(C2=O)c2ccc(Cl)c(Cl)c2)o1	BCBVPTZIDSXEEJ-DHDCSXOGSA-N	CHEMBL376902::med.21724, Compound 110	3C-like proteinase (3CL-PRO)	Human SARS coronavirus		9190			10.1002/med.21724	http://www.bindingdb.org/jsp/dbsearch/PrimarySearch_ki.jsp?energyterm=kJ/mole&tag=r21&monomerid=50370961&enzyme=3C-like+proteinase+%283CL-PRO%29&column=ki&startPg=0&Increment=50&submit=Search	1797640	CHEMBL376902		ZINC28640771
868867	Clc1ccc(cc1)C1C(C(=NN1c1ccc(Cl)c(Cl)c1)c1ccc(Br)cc1)n1ccnc1	KGBQLRVREQTODQ-UHFFFAOYSA-N	med.21724, Compound 111	3C-like proteinase (3CL-PRO)	Human SARS coronavirus		2500			10.1002/med.21724	http://www.bindingdb.org/jsp/dbsearch/PrimarySearch_ki.jsp?energyterm=kJ/mole&tag=r21&monomerid=429438&enzyme=3C-like+proteinase+%283CL-PRO%29&column=ki&startPg=0&Increment=50&submit=Search	11840037
868868	OC(=O)c1ccc(\C=C2\C(NN(C2=O)c2ccc(cc2)C#N)c2ccccc2)cc1	HAAFCLXJXGIIDT-STZFKDTASA-N	jm5b01461, Compound 135	3C-like proteinase (3CL-PRO)	Human SARS coronavirus		5500			10.1002/med.21724	http://www.bindingdb.org/jsp/dbsearch/PrimarySearch_ki.jsp?energyterm=kJ/mole&tag=r21&monomerid=429315&enzyme=3C-like+proteinase+%283CL-PRO%29&column=ki&startPg=0&Increment=50&submit=Search	154732751
868869	OC(=O)c1ccc(\C=C2\C(NN(C2=O)c2ccc(F)cc2)c2ccccc2)cc1	VUQGSOMUWPRSBM-ZHZULCJRSA-N	jm5b01461, Compound 136	3C-like proteinase (3CL-PRO)	Human SARS coronavirus		6600			10.1002/med.21724	http://www.bindingdb.org/jsp/dbsearch/PrimarySearch_ki.jsp?energyterm=kJ/mole&tag=r21&monomerid=429316&enzyme=3C-like+proteinase+%283CL-PRO%29&column=ki&startPg=0&Increment=50&submit=Search	154732752
868870	OC(=O)c1ccc(\C=C2\C(NN(C2=O)c2ccc(cc2)[N+]([O-])=O)c2ccccc2)cc1	XCVLMMDZZIPDBC-ZHZULCJRSA-N	jm5b01461, Compound 137	3C-like proteinase (3CL-PRO)	Human SARS coronavirus		8400			10.1002/med.21724	http://www.bindingdb.org/jsp/dbsearch/PrimarySearch_ki.jsp?energyterm=kJ/mole&tag=r21&monomerid=429317&enzyme=3C-like+proteinase+%283CL-PRO%29&column=ki&startPg=0&Increment=50&submit=Search	154732753
868871	CC(C)c1ccc(cc1)N1NC(\C(=C\C2CCC(O2)c2cc(Cl)ccc2C(O)=O)C1=O)c1ccccc1	PYZYRVGTYCOJSK-ONUIUJJFSA-N	med.21724, Compound 115	3C-like proteinase (3CL-PRO)	Human SARS coronavirus		6000			10.1002/med.21724	http://www.bindingdb.org/jsp/dbsearch/PrimarySearch_ki.jsp?energyterm=kJ/mole&tag=r21&monomerid=429442&enzyme=3C-like+proteinase+%283CL-PRO%29&column=ki&startPg=0&Increment=50&submit=Search	154732808
868873	OC(=O)c1ccc(Cl)cc1C1CCC(O1)\C=C1\C(NN(C1=O)c1ccccc1)c1ccccc1	IRIHAXNBOORUSV-KQWNVCNZSA-N	med.21724, Compound 116	3C-like proteinase (3CL-PRO)	Human SARS coronavirus		41200			10.1002/med.21724	http://www.bindingdb.org/jsp/dbsearch/PrimarySearch_ki.jsp?energyterm=kJ/mole&tag=r21&monomerid=429443&enzyme=3C-like+proteinase+%283CL-PRO%29&column=ki&startPg=0&Increment=50&submit=Search	154732809
868875	CC(C)c1ccc(cc1)N1NC(\C(=C\C2CCC(O2)c2ccccc2C(O)=O)C1=O)c1ccccc1	ZNMADLTXOXKZDF-ITYLOYPMSA-N	med.21724, Compound 117	3C-like proteinase (3CL-PRO)	Human SARS coronavirus		8600			10.1002/med.21724	http://www.bindingdb.org/jsp/dbsearch/PrimarySearch_ki.jsp?energyterm=kJ/mole&tag=r21&monomerid=429444&enzyme=3C-like+proteinase+%283CL-PRO%29&column=ki&startPg=0&Increment=50&submit=Search	154732810
868877	OC(=O)c1ccc(cc1)N1NC(\C(=C\C2CCC(O2)c2ccccc2)C1=O)c1ccccc1	QZFQJLSORKGTSJ-QJOMJCCJSA-N	med.21724, Compound 118	3C-like proteinase (3CL-PRO)	Human SARS coronavirus		6400			10.1002/med.21724	http://www.bindingdb.org/jsp/dbsearch/PrimarySearch_ki.jsp?energyterm=kJ/mole&tag=r21&monomerid=429445&enzyme=3C-like+proteinase+%283CL-PRO%29&column=ki&startPg=0&Increment=50&submit=Search	154732811
868879	[O-][N+](=O)c1cccc(c1)-c1nc(SCc2ccccc2)[nH]c(=O)c1C#N	QJKXZAGZYQHQLA-UHFFFAOYSA-N	jm5b01461, Compound 138	3C-like proteinase (3CL-PRO)	Human SARS coronavirus		>50000			10.1002/med.21724	http://www.bindingdb.org/jsp/dbsearch/PrimarySearch_ki.jsp?energyterm=kJ/mole&tag=r21&monomerid=429318&enzyme=3C-like+proteinase+%283CL-PRO%29&column=ki&startPg=0&Increment=50&submit=Search	154732754
868880	[O-][N+](=O)c1ccc(CSc2nc(-c3cccc(c3)[N+]([O-])=O)c(C#N)c(=O)[nH]2)cc1	FIGLDDCNCCAMJG-UHFFFAOYSA-N	jm5b01461, Compound 139	3C-like proteinase (3CL-PRO)	Human SARS coronavirus		10600			10.1002/med.21724	http://www.bindingdb.org/jsp/dbsearch/PrimarySearch_ki.jsp?energyterm=kJ/mole&tag=r21&monomerid=429319&enzyme=3C-like+proteinase+%283CL-PRO%29&column=ki&startPg=0&Increment=50&submit=Search	154732755
868881	[O-][N+](=O)c1ccc(CSc2nc(-c3ccc(Cl)cc3)c(C#N)c(=O)[nH]2)cc1	WLKIAUCQKBNLKE-UHFFFAOYSA-N	jm5b01461, Compound 140	3C-like proteinase (3CL-PRO)	Human SARS coronavirus		6100			10.1002/med.21724	http://www.bindingdb.org/jsp/dbsearch/PrimarySearch_ki.jsp?energyterm=kJ/mole&tag=r21&monomerid=429320&enzyme=3C-like+proteinase+%283CL-PRO%29&column=ki&startPg=0&Increment=50&submit=Search	154732756
868882	CCC(C)c1ccc(cc1)N(C(C(=O)NC1CCCC1)c1cccnc1)C(=O)c1ccco1	KMPOAXYUGWTIIV-UHFFFAOYSA-N	Furan-2-carboxylic acid (4-sec-butyl-phenyl)-(cyclopentylcarbamoyl-pyridin-3-yl-methyl)-amide::MLS001222477::N-(4-butan-2-ylphenyl)-N-[2-(cyclopentylamino)-2-oxidanylidene-1-pyridin-3-yl-ethyl]furan-2-carboxamide::N-(4-butan-2-ylphenyl)-N-[2-(cyclopentylamino)-2-oxo-1-(3-pyridinyl)ethyl]-2-furancarboxamide::N-(4-butan-2-ylphenyl)-N-[2-(cyclopentylamino)-2-oxo-1-pyridin-3-ylethyl]furan-2-carboxami…	3C-like proteinase (3CL-PRO)	Human SARS coronavirus		2200			10.1002/med.21724	http://www.bindingdb.org/jsp/dbsearch/PrimarySearch_ki.jsp?energyterm=kJ/mole&tag=r21&monomerid=47919&enzyme=3C-like+proteinase+%283CL-PRO%29&column=ki&startPg=0&Increment=50&submit=Search	3196508			ZINC13025377
868884	CC(C)(C)NC(=O)C(N(C(=O)c1ccco1)c1ccc(cc1)C(C)(C)C)c1cccnc1	JXGIYKRRPGCLFV-UHFFFAOYSA-N	jm5b01461, Compound 146	3C-like proteinase (3CL-PRO)	Human SARS coronavirus		4890			10.1002/med.21724	http://www.bindingdb.org/jsp/dbsearch/PrimarySearch_ki.jsp?energyterm=kJ/mole&tag=r21&monomerid=429328&enzyme=3C-like+proteinase+%283CL-PRO%29&column=ki&startPg=0&Increment=50&submit=Search	44634772
868885	CC(C)(C)NC(=O)[C@H](N(C(=O)c1ccco1)c1ccc(cc1)C(C)(C)C)c1cccnc1	JXGIYKRRPGCLFV-JOCHJYFZSA-N	jm5b01461, Compound 146-(R)	3C-like proteinase (3CL-PRO)	Human SARS coronavirus		1500			10.1002/med.21724	http://www.bindingdb.org/jsp/dbsearch/PrimarySearch_ki.jsp?energyterm=kJ/mole&tag=r21&monomerid=429329&enzyme=3C-like+proteinase+%283CL-PRO%29&column=ki&startPg=0&Increment=50&submit=Search	46897844
868886	CC(C)c1ccc(cc1)N(C(C(=O)NC(C)(C)C)c1cccnc1)C(=O)c1ccco1	AZSKMWDSWHSDHV-UHFFFAOYSA-N	jm5b01461, Compound 147	3C-like proteinase (3CL-PRO)	Human SARS coronavirus		28100			10.1002/med.21724	http://www.bindingdb.org/jsp/dbsearch/PrimarySearch_ki.jsp?energyterm=kJ/mole&tag=r21&monomerid=429330&enzyme=3C-like+proteinase+%283CL-PRO%29&column=ki&startPg=0&Increment=50&submit=Search	44634770
868887	CC(C)(C)NC(=O)C(N(C(=O)c1c[nH]cn1)c1ccc(cc1)C(C)(C)C)c1cccnc1		US9975885, Compound 3P::med.21724, Compound 125	3C-like proteinase (3CL-PRO)	Human SARS coronavirus		6000			10.1002/med.21724	http://www.bindingdb.org/jsp/dbsearch/PrimarySearch_ki.jsp?energyterm=kJ/mole&tag=r21&monomerid=420983&enzyme=3C-like+proteinase+%283CL-PRO%29&column=ki&startPg=0&Increment=50&submit=Search
868888	CC(C)(C)NC(=O)C(N(C(=O)c1ccc(Cl)o1)c1ccc(cc1)C(C)(C)C)c1cccnc1	XEIYKIDAVWIOEI-UHFFFAOYSA-N	jm5b01461, Compound 152	3C-like proteinase (3CL-PRO)	Human SARS coronavirus		5200			10.1002/med.21724	http://www.bindingdb.org/jsp/dbsearch/PrimarySearch_ki.jsp?energyterm=kJ/mole&tag=r21&monomerid=429335&enzyme=3C-like+proteinase+%283CL-PRO%29&column=ki&startPg=0&Increment=50&submit=Search	46897836
868889	CC(C)(C)NC(=O)C(N(C(=O)c1ccco1)c1ccc(cc1)C(C)(C)C)c1ccnnc1	TZXGZESALXRMTD-UHFFFAOYSA-N	jm5b01461, Compound 154	3C-like proteinase (3CL-PRO)	Human SARS coronavirus		5200			10.1002/med.21724	http://www.bindingdb.org/jsp/dbsearch/PrimarySearch_ki.jsp?energyterm=kJ/mole&tag=r21&monomerid=429337&enzyme=3C-like+proteinase+%283CL-PRO%29&column=ki&startPg=0&Increment=50&submit=Search	51003635
868890	CC(C)(C)NC(=O)C(N(C(=O)c1ccco1)c1ccc(cc1)C(C)(C)C)c1cnccn1	WLZURSBQLFFPCE-UHFFFAOYSA-N	med.21724, Compound 128	3C-like proteinase (3CL-PRO)	Human SARS coronavirus		5200			10.1002/med.21724	http://www.bindingdb.org/jsp/dbsearch/PrimarySearch_ki.jsp?energyterm=kJ/mole&tag=r21&monomerid=429456&enzyme=3C-like+proteinase+%283CL-PRO%29&column=ki&startPg=0&Increment=50&submit=Search	51003636
868891	CCC(C)(C)NC(=O)C(N(C(=O)Cn1nnc2ccccc12)c1ccc(NC(C)=O)cc1)c1ccn(C)c1	DSWIUPQAVIEPFY-UHFFFAOYSA-N	jm5b01461, Compound 157	3C-like proteinase (3CL-PRO)	Human SARS coronavirus		6200			10.1002/med.21724	http://www.bindingdb.org/jsp/dbsearch/PrimarySearch_ki.jsp?energyterm=kJ/mole&tag=r21&monomerid=429340&enzyme=3C-like+proteinase+%283CL-PRO%29&column=ki&startPg=0&Increment=50&submit=Search	154732766
868892	CC(=O)Nc1ccc(cc1)N(C(C(=O)NC(C)(C)C)c1ccn(C)c1)C(C)=O	UIFUNIBPUBTLIU-UHFFFAOYSA-N	med.21724, Compound 130	3C-like proteinase (3CL-PRO)	Human SARS coronavirus		11000			10.1002/med.21724	http://www.bindingdb.org/jsp/dbsearch/PrimarySearch_ki.jsp?energyterm=kJ/mole&tag=r21&monomerid=429458&enzyme=3C-like+proteinase+%283CL-PRO%29&column=ki&startPg=0&Increment=50&submit=Search	154732812
868893	CC(C)C(=O)Nc1ccc(cc1)N(C(C(=O)NC(C)(C)C)c1ccsc1)C(=O)Cn1nnc2ccccc12	PCVUBRKQJSUBFP-UHFFFAOYSA-N	med.21724, Compound 131	3C-like proteinase (3CL-PRO)	Human SARS coronavirus		4100			10.1002/med.21724	http://www.bindingdb.org/jsp/dbsearch/PrimarySearch_ki.jsp?energyterm=kJ/mole&tag=r21&monomerid=429459&enzyme=3C-like+proteinase+%283CL-PRO%29&column=ki&startPg=0&Increment=50&submit=Search	45382032
868894	CC(C)(C)NC(=O)C(N(C(=O)Cn1nnc2ccccc12)c1ccc(NC(=O)C2CCC2)cc1)c1ccsc1	MIUWEMMHFMGNDH-UHFFFAOYSA-N	med.21724, Compound 132	3C-like proteinase (3CL-PRO)	Human SARS coronavirus		3800			10.1002/med.21724	http://www.bindingdb.org/jsp/dbsearch/PrimarySearch_ki.jsp?energyterm=kJ/mole&tag=r21&monomerid=429460&enzyme=3C-like+proteinase+%283CL-PRO%29&column=ki&startPg=0&Increment=50&submit=Search	46861523
868895	CCC(=O)Nc1ccc(cc1)N(Cc1ccsc1)C(=O)Cn1nnc2ccccc12	TWIVXCFEBRGEKY-UHFFFAOYSA-N	med.21724, Compound 133	3C-like proteinase (3CL-PRO)	Human SARS coronavirus		2900			10.1002/med.21724	http://www.bindingdb.org/jsp/dbsearch/PrimarySearch_ki.jsp?energyterm=kJ/mole&tag=r21&monomerid=429461&enzyme=3C-like+proteinase+%283CL-PRO%29&column=ki&startPg=0&Increment=50&submit=Search	56932132
868896	CC(C)C(=O)Nc1ccc(cc1)N(Cc1ccsc1)C(=O)Cn1nnc2ccccc12	LTKZCHKSOAHTRI-UHFFFAOYSA-N	med.21724, Compound 134	3C-like proteinase (3CL-PRO)	Human SARS coronavirus		3600			10.1002/med.21724	http://www.bindingdb.org/jsp/dbsearch/PrimarySearch_ki.jsp?energyterm=kJ/mole&tag=r21&monomerid=429462&enzyme=3C-like+proteinase+%283CL-PRO%29&column=ki&startPg=0&Increment=50&submit=Search	46861533
868897	O=C(Cc1ccccc1)Nc1ccc(cc1)N(Cc1ccsc1)C(=O)Cn1nnc2ccccc12	GJWKQPQSAJYUKW-UHFFFAOYSA-N	med.21724, Compound 135	3C-like proteinase (3CL-PRO)	Human SARS coronavirus		1500			10.1002/med.21724	http://www.bindingdb.org/jsp/dbsearch/PrimarySearch_ki.jsp?energyterm=kJ/mole&tag=r21&monomerid=429463&enzyme=3C-like+proteinase+%283CL-PRO%29&column=ki&startPg=0&Increment=50&submit=Search	154732813
868898	O=C(Cn1nnc2ccccc12)N(Cc1ccsc1)c1ccc(cc1)-c1cccnc1	LHBIUOYHJIXRST-UHFFFAOYSA-N	ML300-based SC inhibitor 8::med.21724, Compound 136	3C-like proteinase (3CL-PRO)	Human SARS coronavirus		970			10.1002/med.21724	http://www.bindingdb.org/jsp/dbsearch/PrimarySearch_ki.jsp?energyterm=kJ/mole&tag=r21&monomerid=429464&enzyme=3C-like+proteinase+%283CL-PRO%29&column=ki&startPg=0&Increment=50&submit=Search	56973495
868899	O=C(Cn1nnc2ccccc12)N(Cc1ccsc1)c1ccc(cc1)-c1ccccc1	BRLBTOJQLXGOHO-UHFFFAOYSA-N	ML300-based SC inhibitor 7::med.21724, Compound 137	3C-like proteinase (3CL-PRO)	Human SARS coronavirus		510			10.1002/med.21724	http://www.bindingdb.org/jsp/dbsearch/PrimarySearch_ki.jsp?energyterm=kJ/mole&tag=r21&monomerid=429465&enzyme=3C-like+proteinase+%283CL-PRO%29&column=ki&startPg=0&Increment=50&submit=Search	56973489
868900	Oc1ccc(cc1)-c1cc(=O)c2c(O)cc(O)c(-c3cc(ccc3O)-c3cc(=O)c4c(O)cc(O)cc4o3)c2o1	YUSWMAULDXZHPY-UHFFFAOYSA-N	med.21724, Compound 138	3C-like proteinase (3CL-PRO)	Human SARS coronavirus		8300			10.1002/med.21724	http://www.bindingdb.org/jsp/dbsearch/PrimarySearch_ki.jsp?energyterm=kJ/mole&tag=r21&monomerid=429466&enzyme=3C-like+proteinase+%283CL-PRO%29&column=ki&startPg=0&Increment=50&submit=Search	5281600
868901	CC(C)c1cc2CCC3C(C)(C)CCC[C@]3(C)c2cc1O	QXNWVJOHUAQHLM-ROPPNANJSA-N	med.21724, Compound 139	3C-like proteinase (3CL-PRO)	Human SARS coronavirus		49600			10.1002/med.21724	http://www.bindingdb.org/jsp/dbsearch/PrimarySearch_ki.jsp?energyterm=kJ/mole&tag=r21&monomerid=429467&enzyme=3C-like+proteinase+%283CL-PRO%29&column=ki&startPg=0&Increment=50&submit=Search	403773
868902	CC1=CC[C@]2(C)CC[C@]3(C)C4=CC=C5C(C)=C(O)C(=O)C=C5C4CC[C@@]3(C)C2C1	SORBLAVXYAQHEG-PAIAULSUSA-N	med.21724, Compound 140	3C-like proteinase (3CL-PRO)	Human SARS coronavirus		2600			10.1002/med.21724	http://www.bindingdb.org/jsp/dbsearch/PrimarySearch_ki.jsp?energyterm=kJ/mole&tag=r21&monomerid=429468&enzyme=3C-like+proteinase+%283CL-PRO%29&column=ki&startPg=0&Increment=50&submit=Search	154732814
868903	C[C@@H]1CC2[C@@](C)(CC[C@]3(C)C4=CC=C5C(C)=C(O)C(=O)C=C5[C@]4(C)CC[C@@]23C)CC1=O	WSTYNZDAOAEEKG-JCNSEWGNSA-N	med.21724, Compound 141	3C-like proteinase (3CL-PRO)	Human SARS coronavirus		9900			10.1002/med.21724	http://www.bindingdb.org/jsp/dbsearch/PrimarySearch_ki.jsp?energyterm=kJ/mole&tag=r21&monomerid=429469&enzyme=3C-like+proteinase+%283CL-PRO%29&column=ki&startPg=0&Increment=50&submit=Search	134777016
868904	COC(=O)[C@]1(C)CC[C@]2(C)CC[C@]3(C)C4=CC=C5C(C)=C(O)C(=O)C=C5[C@]4(C)CC[C@@]3(C)C2C1	JFACETXYABVHFD-RKHSXEAASA-N	CHEMBL4207055::med.21724, Compound 142	3C-like proteinase (3CL-PRO)	Human SARS coronavirus		5500			10.1002/med.21724	http://www.bindingdb.org/jsp/dbsearch/PrimarySearch_ki.jsp?energyterm=kJ/mole&tag=r21&monomerid=50450775&enzyme=3C-like+proteinase+%283CL-PRO%29&column=ki&startPg=0&Increment=50&submit=Search	10004662
868905	CC(=C)[C@@H]1CC[C@@]2(CC[C@]3(C)C(CCC4[C@@]5(C)CC[C@H](O)C(C)(C)C5CC[C@@]34C)C12)C(O)=O	QGJZLNKBHJESQX-UOTMTCHLSA-N	med.21724, Compound 143	3C-like proteinase (3CL-PRO)	Human SARS coronavirus		10000			10.1002/med.21724	http://www.bindingdb.org/jsp/dbsearch/PrimarySearch_ki.jsp?energyterm=kJ/mole&tag=r21&monomerid=429471&enzyme=3C-like+proteinase+%283CL-PRO%29&column=ki&startPg=0&Increment=50&submit=Search	3010927
868906	O=C1OC[C@H](Cc2ccc3OCOc3c2)\C1=C/c1ccc2OCOc2c1	CMJGAYUQSLJSCR-ULIPXBITSA-N	med.21724, Compound 144	3C-like proteinase (3CL-PRO)	Human SARS coronavirus		25000			10.1002/med.21724	http://www.bindingdb.org/jsp/dbsearch/PrimarySearch_ki.jsp?energyterm=kJ/mole&tag=r21&monomerid=429472&enzyme=3C-like+proteinase+%283CL-PRO%29&column=ki&startPg=0&Increment=50&submit=Search	5281867
868907	Cc1cc(c(Cl)cc1Cl)S(=O)(=O)c1c(cc(cc1[N+]([O-])=O)C(F)(F)F)[N+]([O-])=O	INAZPZCJNPPHGV-UHFFFAOYSA-N	1,5-dichloro-2-{[2,6-dinitro-4-(trifluoromethyl)benzene]sulfonyl}-4-methylbenzene::Compound 1 analog 3::med.21724, Compound 147	3C-like proteinase (3CL-PRO)	Human SARS coronavirus		300			10.1002/med.21724	http://www.bindingdb.org/jsp/dbsearch/PrimarySearch_ki.jsp?energyterm=kJ/mole&tag=r21&monomerid=11292&enzyme=3C-like+proteinase+%283CL-PRO%29&column=ki&startPg=0&Increment=50&submit=Search	2799606		DB07620	ZINC08626709
868908	FC(F)(F)c1nnc(SC(=O)c2ccc(o2)C#Cc2ccccc2)[nH]1	VNGWUVBXUIDQTK-UHFFFAOYSA-N	Compound 2 analog 15::MurB inhibitor (compound 16)::[5-(2-phenylethynyl)furan-2-yl]({[5-(trifluoromethyl)-4H-1,2,4-triazol-3-yl]sulfanyl})methanone::med.21724, Compound 148	3C-like proteinase (3CL-PRO)	Human SARS coronavirus		3000			10.1002/med.21724	http://www.bindingdb.org/jsp/dbsearch/PrimarySearch_ki.jsp?energyterm=kJ/mole&tag=r21&monomerid=11304&enzyme=3C-like+proteinase+%283CL-PRO%29&column=ki&startPg=0&Increment=50&submit=Search	2822496		DB07743	ZINC01039846
868909	CC1=C(C(C2C(CCCC2=O)N1)c1ccccc1[N+]([O-])=O)C(=O)OCCc1ccccc1	TYYASYBDGIPMJT-UHFFFAOYSA-N	jm5b01461, Compound 179	3C-like proteinase (3CL-PRO)	Human SARS coronavirus		2500			10.1002/med.21724	http://www.bindingdb.org/jsp/dbsearch/PrimarySearch_ki.jsp?energyterm=kJ/mole&tag=r21&monomerid=429362&enzyme=3C-like+proteinase+%283CL-PRO%29&column=ki&startPg=0&Increment=50&submit=Search	154732778
868910	CN(C)CCCSc1ccccc1NC(=C)\C=C\c1ccccc1	HJFMIWXBUVNFLF-CCEZHUSRSA-N	med.21724, Compound 150	3C-like proteinase (3CL-PRO)	Human SARS coronavirus		5000			10.1002/med.21724	http://www.bindingdb.org/jsp/dbsearch/PrimarySearch_ki.jsp?energyterm=kJ/mole&tag=r21&monomerid=429476&enzyme=3C-like+proteinase+%283CL-PRO%29&column=ki&startPg=0&Increment=50&submit=Search	154732815
868952	CCN(CC)CCCC(C)Nc1ccnc2cc(Cl)ccc12	WHTVZRBIWZFKQO-UHFFFAOYSA-N	Aralen::CHEMBL76::CHLOROQUINE PHOSPHATE::Chlorochin::Chloroquine::Chloroquine, 17::med.21724, Compound 8::{4-[(7-chloroquinolin-4-yl)amino]pentyl}diethylamine	3C-like proteinase (3CL-PRO)	Human SARS coronavirus				4100	10.1002/med.21724	http://www.bindingdb.org/jsp/dbsearch/PrimarySearch_ki.jsp?energyterm=kJ/mole&tag=r21&monomerid=22985&enzyme=3C-like+proteinase+%283CL-PRO%29&column=ki&startPg=0&Increment=50&submit=Search	2719	CHEMBL76	DB00608	ZINC01530861
868955	CN(C)CCCN1c2ccccc2Sc2ccc(Cl)cc12	ZPEIMTDSQAKGNT-UHFFFAOYSA-N	(chloropromazine) [3-(2-Chloro-phenothiazin-10-yl)-propyl]-dimethyl-amine::(chlorpromazine)[3-(2-Chloro-phenothiazin-10-yl)-propyl]-dimethyl-amine::1-(2-Allyl-phenoxy)-3-isopropylamino-propan-2-ol::1N,1N-dimethyl-3-(2-chloro-10H-10-phenothiazinyl)-1-propanamine::3-(2-chloro-10H-phenothiazin-10-yl)-N,N-dimethylpropan-1-amine::CHEMBL71::CHLORPROMAZINE::CHLORPROMAZINE HIBENZATE::CHLORPROMAZINE HYDRO…	3C-like proteinase (3CL-PRO)	Human SARS coronavirus				8800	10.1002/med.21724	http://www.bindingdb.org/jsp/dbsearch/PrimarySearch_ki.jsp?energyterm=kJ/mole&tag=r21&monomerid=50001888&enzyme=3C-like+proteinase+%283CL-PRO%29&column=ki&startPg=0&Increment=50&submit=Search	2726	CHEMBL71	DB00477	ZINC00044027
868958	CN(C)C(=O)C(CCN1CCC(O)(CC1)c1ccc(Cl)cc1)(c1ccccc1)c1ccccc1	RDOIQAHITMMDAJ-UHFFFAOYSA-N	4-(4-(4-chlorophenyl)-4-hydroxypiperidin-1-yl)-N,N-dimethyl-2,2-diphenylbutanamide::4-[4-(4-Chloro-phenyl)-4-hydroxy-piperidin-1-yl]-N,N-dimethyl-2,2-diphenyl-butyramide::4-[4-(4-Chloro-phenyl)-4-hydroxy-piperidin-1-yl]-N,N-dimethyl-2,2-diphenyl-butyramide(loperamide)::CHEMBL841::Imodium::LOPERAMIDE::LOPERAMIDE HYDROCHLORIDE::cid_71420::med.21724, Compound 184	3C-like proteinase (3CL-PRO)	Human SARS coronavirus				5900	10.1002/med.21724	http://www.bindingdb.org/jsp/dbsearch/PrimarySearch_ki.jsp?energyterm=kJ/mole&tag=r21&monomerid=50017698&enzyme=3C-like+proteinase+%283CL-PRO%29&column=ki&startPg=0&Increment=50&submit=Search	3955	CHEMBL841	DB00836	ZINC00537928
868961	CC(C)[C@H](N1CCCNC1=O)C(=O)N[C@H](C[C@H](O)[C@H](Cc1ccccc1)NC(=O)COc1c(C)cccc1C)Cc1ccccc1	KJHKTHWMRKYKJE-SUGCFTRWSA-N	A-157378-0::A-157378.0::ABT-378::CHEBI:31781::Kaletra::LOPINAVIR::Lopinavir::med.21724, Compound 185	3C-like proteinase (3CL-PRO)	Human SARS coronavirus				17100	10.1002/med.21724	http://www.bindingdb.org/jsp/dbsearch/PrimarySearch_ki.jsp?energyterm=kJ/mole&tag=r21&monomerid=50180655&enzyme=3C-like+proteinase+%283CL-PRO%29&column=ki&startPg=0&Increment=50&submit=Search	92727		DB01601
868972	CC[C@H]1CN2CCc3cc(OC)c(OC)cc3[C@@H]2C[C@@H]1C[C@H]1NCCc2cc(OC)c(OC)cc12	AUVVAXYIELKVAI-CKBKHPSWSA-N	(2S,3R,11bS)-2-[[(1R)-6,7-dimethoxy-1,2,3,4-tetrahydroisoquinolin-1-yl]methyl]-3-ethyl-9,10-dimethoxy-2,3,4,6,7,11b-hexahydro-1H-benzo[a]quinolizine;hydrochloride::EMETINE HYDROCHLORIDE::MLS000028478::SMR000058444::cid_6603320::med.21724, Compound Emetine	3C-like proteinase (3CL-PRO)	Human SARS coronavirus				51	10.1002/med.21724	http://www.bindingdb.org/jsp/dbsearch/PrimarySearch_ki.jsp?energyterm=kJ/mole&tag=r21&monomerid=38871&enzyme=3C-like+proteinase+%283CL-PRO%29&column=ki&startPg=0&Increment=50&submit=Search	10219			ZINC03830747
868974	CCN(CC)CCCC(C)Nc1ccnc2cc(Cl)ccc12	WHTVZRBIWZFKQO-UHFFFAOYSA-N	Aralen::CHEMBL76::CHLOROQUINE PHOSPHATE::Chlorochin::Chloroquine::Chloroquine, 17::med.21724, Compound 8::{4-[(7-chloroquinolin-4-yl)amino]pentyl}diethylamine	3C-like proteinase (3CL-PRO)	Human SARS coronavirus				6530	10.1002/med.21724	http://www.bindingdb.org/jsp/dbsearch/PrimarySearch_ki.jsp?energyterm=kJ/mole&tag=r21&monomerid=22985&enzyme=3C-like+proteinase+%283CL-PRO%29&column=ki&startPg=0&Increment=50&submit=Search	2719	CHEMBL76	DB00608	ZINC01530861
868976	CCN(CCO)CCCC(C)Nc1ccnc2cc(Cl)ccc12	XXSMGPRMXLTPCZ-UHFFFAOYSA-N	CHEBI:5801::HYDROXYCHLOROQUINE::Hydroxychloroquine::med.21724, Compound 9	3C-like proteinase (3CL-PRO)	Human SARS coronavirus				7960	10.1002/med.21724	http://www.bindingdb.org/jsp/dbsearch/PrimarySearch_ki.jsp?energyterm=kJ/mole&tag=r21&monomerid=50467780&enzyme=3C-like+proteinase+%283CL-PRO%29&column=ki&startPg=0&Increment=50&submit=Search	3652
868978	OC(C1CCCCN1)c1cc(nc2c(cccc12)C(F)(F)F)C(F)(F)F	XEEQGYMUWCZPDN-UHFFFAOYSA-N	(2,8-Bis-trifluoromethyl-quinolin-4-yl)-(1-methyl-piperidin-2-yl)-methanol::(2,8-Bis-trifluoromethyl-quinolin-4-yl)-piperidin-2-yl-methanol::(2,8-Bis-trifluoromethyl-quinolin-4-yl)-piperidin-2-yl-methanol( Mefloquine)::(2,8-Bis-trifluoromethyl-quinolin-4-yl)-piperidin-2-yl-methanol; (Mefloquine or MF)::(2,8-bis(trifluoromethyl)quinolin-4-yl)(piperidin-2-yl)methanol::(S)-(2,8-Bis-trifluoromethyl-q…	3C-like proteinase (3CL-PRO)	Human SARS coronavirus				15550	10.1002/med.21724	http://www.bindingdb.org/jsp/dbsearch/PrimarySearch_ki.jsp?energyterm=kJ/mole&tag=r21&monomerid=50022889&enzyme=3C-like+proteinase+%283CL-PRO%29&column=ki&startPg=0&Increment=50&submit=Search	4046	CHEMBL416956	DB00358	ZINC03874185
868980	CCN(CC)Cc1cc(Nc2ccnc3cc(Cl)ccc23)ccc1O	OVCDSSHSILBFBN-UHFFFAOYSA-N	4-[(7-chloroquinolin-4-yl)amino]-2-[(diethylamino)methyl]phenol::AMODIAQUINE::CHEMBL682::med.21724, Compound 188	3C-like proteinase (3CL-PRO)	Human SARS coronavirus				1270	10.1002/med.21724	http://www.bindingdb.org/jsp/dbsearch/PrimarySearch_ki.jsp?energyterm=kJ/mole&tag=r21&monomerid=50041457&enzyme=3C-like+proteinase+%283CL-PRO%29&column=ki&startPg=0&Increment=50&submit=Search	2165	CHEMBL682	DB00613	ZINC32709485
868982	CN(C)C(=O)C(CCN1CCC(O)(CC1)c1ccc(Cl)cc1)(c1ccccc1)c1ccccc1	RDOIQAHITMMDAJ-UHFFFAOYSA-N	4-(4-(4-chlorophenyl)-4-hydroxypiperidin-1-yl)-N,N-dimethyl-2,2-diphenylbutanamide::4-[4-(4-Chloro-phenyl)-4-hydroxy-piperidin-1-yl]-N,N-dimethyl-2,2-diphenyl-butyramide::4-[4-(4-Chloro-phenyl)-4-hydroxy-piperidin-1-yl]-N,N-dimethyl-2,2-diphenyl-butyramide(loperamide)::CHEMBL841::Imodium::LOPERAMIDE::LOPERAMIDE HYDROCHLORIDE::cid_71420::med.21724, Compound 184	3C-like proteinase (3CL-PRO)	Human SARS coronavirus				5900	10.1002/med.21724	http://www.bindingdb.org/jsp/dbsearch/PrimarySearch_ki.jsp?energyterm=kJ/mole&tag=r21&monomerid=50017698&enzyme=3C-like+proteinase+%283CL-PRO%29&column=ki&startPg=0&Increment=50&submit=Search	3955	CHEMBL841	DB00836	ZINC00537928
868984	CC(C)[C@H](N1CCCNC1=O)C(=O)N[C@H](C[C@H](O)[C@H](Cc1ccccc1)NC(=O)COc1c(C)cccc1C)Cc1ccccc1	KJHKTHWMRKYKJE-SUGCFTRWSA-N	A-157378-0::A-157378.0::ABT-378::CHEBI:31781::Kaletra::LOPINAVIR::Lopinavir::med.21724, Compound 185	3C-like proteinase (3CL-PRO)	Human SARS coronavirus				24400	10.1002/med.21724	http://www.bindingdb.org/jsp/dbsearch/PrimarySearch_ki.jsp?energyterm=kJ/mole&tag=r21&monomerid=50180655&enzyme=3C-like+proteinase+%283CL-PRO%29&column=ki&startPg=0&Increment=50&submit=Search	92727		DB01601
868986	CCOC(=O)C1OC1C(=O)NC(CC(C)C)C(=O)NCCC(C)C	SRVFFFJZQVENJC-UHFFFAOYSA-N	med.21724, Compound 27	3C-like proteinase (3CL-PRO)	Human SARS coronavirus				760	10.1002/med.21724	http://www.bindingdb.org/jsp/dbsearch/PrimarySearch_ki.jsp?energyterm=kJ/mole&tag=r21&monomerid=429291&enzyme=3C-like+proteinase+%283CL-PRO%29&column=ki&startPg=0&Increment=50&submit=Search	3189
868988	Nc1ccn([C@@H]2O[C@H](CO)[C@@H](O)C2(F)F)c(=O)n1	SDUQYLNIPVEERB-QPPQHZFASA-N	med.21724, Compound Gemcitabine	3C-like proteinase (3CL-PRO)	Human SARS coronavirus				4950	10.1002/med.21724	http://www.bindingdb.org/jsp/dbsearch/PrimarySearch_ki.jsp?energyterm=kJ/mole&tag=r21&monomerid=429521&enzyme=3C-like+proteinase+%283CL-PRO%29&column=ki&startPg=0&Increment=50&submit=Search	60750
868990	CC\C(=C(/c1ccccc1)c1ccc(OCCN(C)C)cc1)c1ccccc1	NKANXQFJJICGDU-QPLCGJKRSA-N	(2-{4-[(1Z)-1,2-diphenylbut-1-en-1-yl]phenoxy}ethyl)dimethylamine::2-{4-[(1Z)-1,2-diphenylbut-1-en-1-yl]phenoxy}-N,N-dimethylethanamine::CHEMBL83::FOSTRIECIN SODIUM::NCGC00024928::Nolvadex::Tamoxifen::Tamoxifen (8)::Tamoxifen, 7::cid_2733526::med.21724, Compound Tamoxifen	3C-like proteinase (3CL-PRO)	Human SARS coronavirus				92880	10.1002/med.21724	http://www.bindingdb.org/jsp/dbsearch/PrimarySearch_ki.jsp?energyterm=kJ/mole&tag=r21&monomerid=20607&enzyme=3C-like+proteinase+%283CL-PRO%29&column=ki&startPg=0&Increment=50&submit=Search	2733526	CHEMBL83	DB00675	ZINC01530689
868992	CN(C)CCOc1ccc(cc1)C(=C(\CCCl)c1ccccc1)\c1ccccc1	XFCLJVABOIYOMF-QPLCGJKRSA-N	2-[4-[(Z)-4-chloranyl-1,2-diphenyl-but-1-enyl]phenoxy]-N,N-dimethyl-ethanamine;2-oxidanylpropane-1,2,3-tricarboxylic acid::2-[4-[(Z)-4-chloro-1,2-diphenyl-but-1-enyl]phenoxy]ethyl-dimethyl-amine;citric acid::2-[4-[(Z)-4-chloro-1,2-diphenylbut-1-enyl]phenoxy]-N,N-dimethylethanamine;2-hydroxypropane-1,2,3-tricarboxylic acid::MLS001424189::SMR000469213::TOREMIFENE::TOREMIFENE CITRATE::cid_3005572::m…	3C-like proteinase (3CL-PRO)	Human SARS coronavirus				11960	10.1002/med.21724	http://www.bindingdb.org/jsp/dbsearch/PrimarySearch_ki.jsp?energyterm=kJ/mole&tag=r21&monomerid=58492&enzyme=3C-like+proteinase+%283CL-PRO%29&column=ki&startPg=0&Increment=50&submit=Search	3005573		DB00539	ZINC12404516
868994	CC(C)N1CCN(CC1)c1ccc(OC[C@H]2CO[C@@](Cn3cncn3)(O2)c2ccc(Cl)cc2Cl)cc1	BLSQLHNBWJLIBQ-OZXSUGGESA-N	Fungistat::Gyno-Terazol::Panlomyc::R-42470::TERCONAZOLE::Terazol::Terazol 3::Terazol 7::med.21724, Compound Terconazole	3C-like proteinase (3CL-PRO)	Human SARS coronavirus				15320	10.1002/med.21724	http://www.bindingdb.org/jsp/dbsearch/PrimarySearch_ki.jsp?energyterm=kJ/mole&tag=r21&monomerid=50375318&enzyme=3C-like+proteinase+%283CL-PRO%29&column=ki&startPg=0&Increment=50&submit=Search	441383		DB00251	ZINC03873936
868997	COc1ccc(C[C@H]2NC[C@H](O)[C@H]2OC(C)=O)cc1	YKJYKKNCCRKFSL-RDBSUJKOSA-N	Anisomycin from Streptomyces griseolus::MLS001066392::SMR000471874::[(2R,3S,4S)-2-[(4-methoxyphenyl)methyl]-4-oxidanyl-pyrrolidin-3-yl] ethanoate::[(2R,3S,4S)-4-hydroxy-2-[(4-methoxyphenyl)methyl]pyrrolidin-3-yl] acetate::acetic acid [(2R,3S,4S)-4-hydroxy-2-[(4-methoxyphenyl)methyl]-3-pyrrolidinyl] ester::acetic acid [(2R,3S,4S)-4-hydroxy-2-p-anisyl-pyrrolidin-3-yl] ester::cid_253602::med.21724, …	3C-like proteinase (3CL-PRO)	Human SARS coronavirus				190	10.1002/med.21724	http://www.bindingdb.org/jsp/dbsearch/PrimarySearch_ki.jsp?energyterm=kJ/mole&tag=r21&monomerid=63919&enzyme=3C-like+proteinase+%283CL-PRO%29&column=ki&startPg=0&Increment=50&submit=Search	253602		DB07374	ZINC00000954
868999	C[C@H]1C[C@H](C)C(=O)[C@@H](C1)[C@H](O)CC1CC(=O)NC(=O)C1	YPHMISFOHDHNIV-FSZOTQKASA-N	3-((R)-2-((1S,3S,5S)-3,5-dimethyl-2-oxocyclohexyl)-2-hydroxyethyl)glutarimide::4-{(2R)-2-[(1S,3S,5S)-3,5-dimethyl-2-oxocyclohexyl]-2-hydroxyethyl}piperidine-2,6-dione::CHEMBL123292::Cycloheximid::Zykloheximid::cid_6197::cycloheximide::med.21724, Compound Cycloheximide	3C-like proteinase (3CL-PRO)	Human SARS coronavirus				40	10.1002/med.21724	http://www.bindingdb.org/jsp/dbsearch/PrimarySearch_ki.jsp?energyterm=kJ/mole&tag=r21&monomerid=50080528&enzyme=3C-like+proteinase+%283CL-PRO%29&column=ki&startPg=0&Increment=50&submit=Search	6197	CHEMBL123292		ZINC03872170
869002	CN1[C@H]2CC[C@@H]1CC(C2)OC(c1ccccc1)c1ccccc1	GIJXKZJWITVLHI-YOFSQIOKSA-N	med.21724, Compound Benztropine	3C-like proteinase (3CL-PRO)	Human SARS coronavirus				21610	10.1002/med.21724	http://www.bindingdb.org/jsp/dbsearch/PrimarySearch_ki.jsp?energyterm=kJ/mole&tag=r21&monomerid=429529&enzyme=3C-like+proteinase+%283CL-PRO%29&column=ki&startPg=0&Increment=50&submit=Search	1201549
869004	Fc1ccc(cc1)C(CCCN1CCC2(CC1)N(CNC2=O)c1ccccc1)c1ccc(F)cc1	QOYHHIBFXOOADH-UHFFFAOYSA-N	8-[4,4-bis(4-fluorophenyl)butyl]-1-phenyl-1,3,8-triazaspiro[4.5]decan-4-one::CHEMBL46516::FLUSPIRILENE::NCGC00015424::cid_3396::med.21724, Compound Fluspirilene::spiropiperidine analogue, 1	3C-like proteinase (3CL-PRO)	Human SARS coronavirus				5960	10.1002/med.21724	http://www.bindingdb.org/jsp/dbsearch/PrimarySearch_ki.jsp?energyterm=kJ/mole&tag=r21&monomerid=26948&enzyme=3C-like+proteinase+%283CL-PRO%29&column=ki&startPg=0&Increment=50&submit=Search	3396	CHEMBL46516	DB04842	ZINC00537755
869006	CN(C)S(=O)(=O)c1ccc2Sc3ccccc3\C(=C\CCN3CCN(C)CC3)c2c1	GFBKORZTTCHDGY-UWVJOHFNSA-N	CIS-THIOTHIXENE::MLS000028463::SMR000058396::THIOTHIXENE::cid_941651::med.21724, Compound Thiothixene	3C-like proteinase (3CL-PRO)	Human SARS coronavirus				5310	10.1002/med.21724	http://www.bindingdb.org/jsp/dbsearch/PrimarySearch_ki.jsp?energyterm=kJ/mole&tag=r21&monomerid=78576&enzyme=3C-like+proteinase+%283CL-PRO%29&column=ki&startPg=0&Increment=50&submit=Search	941651		DB01623	ZINC30690433
869008	CN(C)CCCN1c2ccccc2Sc2ccc(Cl)cc12	ZPEIMTDSQAKGNT-UHFFFAOYSA-N	(chloropromazine) [3-(2-Chloro-phenothiazin-10-yl)-propyl]-dimethyl-amine::(chlorpromazine)[3-(2-Chloro-phenothiazin-10-yl)-propyl]-dimethyl-amine::1-(2-Allyl-phenoxy)-3-isopropylamino-propan-2-ol::1N,1N-dimethyl-3-(2-chloro-10H-10-phenothiazinyl)-1-propanamine::3-(2-chloro-10H-phenothiazin-10-yl)-N,N-dimethylpropan-1-amine::CHEMBL71::CHLORPROMAZINE::CHLORPROMAZINE HIBENZATE::CHLORPROMAZINE HYDRO…	3C-like proteinase (3CL-PRO)	Human SARS coronavirus				12970	10.1002/med.21724	http://www.bindingdb.org/jsp/dbsearch/PrimarySearch_ki.jsp?energyterm=kJ/mole&tag=r21&monomerid=50001888&enzyme=3C-like+proteinase+%283CL-PRO%29&column=ki&startPg=0&Increment=50&submit=Search	2726	CHEMBL71	DB00477	ZINC00044027
869010	OCCN1CCN(CCCN2c3ccccc3Sc3ccc(cc23)C(F)(F)F)CC1	PLDUPXSUYLZYBN-UHFFFAOYSA-N	2-[4-[3-[2-(trifluoromethyl)-10-phenothiazinyl]propyl]-1-piperazinyl]ethanol;hydrochloride::2-[4-[3-[2-(trifluoromethyl)phenothiazin-10-yl]propyl]piperazin-1-yl]ethanol;hydrochloride::2-[4-[3-[2-(trifluoromethyl)phenothiazin-10-yl]propyl]piperazino]ethanol;hydrochloride::FLUPHENAZINE::FLUPHENAZINE HYDROCHLORIDE::MLS001076508::SMR000058411::cid_3372::cid_6602611::med.21724, Compound 17	3C-like proteinase (3CL-PRO)	Human SARS coronavirus				21430	10.1002/med.21724	http://www.bindingdb.org/jsp/dbsearch/PrimarySearch_ki.jsp?energyterm=kJ/mole&tag=r21&monomerid=78433&enzyme=3C-like+proteinase+%283CL-PRO%29&column=ki&startPg=0&Increment=50&submit=Search	3372		DB00623	ZINC19203912
869012	CC(CN1c2ccccc2Sc2ccccc12)N(C)C	PWWVAXIEGOYWEE-UHFFFAOYSA-N	(2-dimethylamino-2-methyl)ethyl-N-dibenzoparathiazine::10-(2-Dimethylaminopropyl)phenothiazine::10-[2-(dimethylamino)propyl]phenothiazine::CHEMBL643::N,N,alpha-trimethyl-10H-phenothiazine-10-ethanamine::N,N-dimethyl-1-(10H-phenothiazin-10-yl)propan-2-amine::PROMETHAZINE::med.21724, Compound 16::proazamine	3C-like proteinase (3CL-PRO)	Human SARS coronavirus				7540	10.1002/med.21724	http://www.bindingdb.org/jsp/dbsearch/PrimarySearch_ki.jsp?energyterm=kJ/mole&tag=r21&monomerid=50017696&enzyme=3C-like+proteinase+%283CL-PRO%29&column=ki&startPg=0&Increment=50&submit=Search	4927	CHEMBL643	DB01069	ZINC00056647
869014	COc1ccc(CCN2CCC(CC2)Nc2nc3ccccc3n2Cc2ccc(F)cc2)cc1	GXDALQBWZGODGZ-UHFFFAOYSA-N	1-[(4-fluorophenyl)methyl]-N-{1-[2-(4-methoxyphenyl)ethyl]piperidin-4-yl}-1H-1,3-benzodiazol-2-amine::ASTEMIZOLE::Astemizole, [O-Methyl-3H]::CHEMBL296419::Hismanal::Histaminos::[3H]-ASTEMIZOLE::[3H]Astemizole::cid_2247::med.21724, Compound Astemizole	3C-like proteinase (3CL-PRO)	Human SARS coronavirus				5590	10.1002/med.21724	http://www.bindingdb.org/jsp/dbsearch/PrimarySearch_ki.jsp?energyterm=kJ/mole&tag=r21&monomerid=24226&enzyme=3C-like+proteinase+%283CL-PRO%29&column=ki&startPg=0&Increment=50&submit=Search	2247	CHEMBL296419	DB00637	ZINC00601274
869016	CN(C)CCOC(C)(c1ccccc1)c1ccc(Cl)cc1	KKHPNPMTPORSQE-UHFFFAOYSA-N	med.21724, Compound Chlorphenoxamine	3C-like proteinase (3CL-PRO)	Human SARS coronavirus				20030	10.1002/med.21724	http://www.bindingdb.org/jsp/dbsearch/PrimarySearch_ki.jsp?energyterm=kJ/mole&tag=r21&monomerid=429534&enzyme=3C-like+proteinase+%283CL-PRO%29&column=ki&startPg=0&Increment=50&submit=Search	6475
869019	CN(C)CCCN1c2ccccc2Sc2ccc(cc12)C(F)(F)F	XSCGXQMFQXDFCW-UHFFFAOYSA-N	N,N-dimethyl-3-[2-(trifluoromethyl)-10-phenothiazinyl]-1-propanamine;hydrochloride::N,N-dimethyl-3-[2-(trifluoromethyl)phenothiazin-10-yl]propan-1-amine;hydrochloride::SR-01000000224-4::TRIFLUPROMAZINE::cid_66069::dimethyl-[3-[2-(trifluoromethyl)phenothiazin-10-yl]propyl]amine;hydrochloride::med.21724, Compound Triflupromazine	3C-like proteinase (3CL-PRO)	Human SARS coronavirus				6390	10.1002/med.21724	http://www.bindingdb.org/jsp/dbsearch/PrimarySearch_ki.jsp?energyterm=kJ/mole&tag=r21&monomerid=67544&enzyme=3C-like+proteinase+%283CL-PRO%29&column=ki&startPg=0&Increment=50&submit=Search	5568		DB00508	ZINC00538507
869021	CN(C)CCCN1c2ccccc2CCc2ccc(Cl)cc12	GDLIGKIOYRNHDA-UHFFFAOYSA-N	3-(2-chloranyl-5,6-dihydrobenzo[b][1]benzazepin-11-yl)-N,N-dimethyl-propan-1-amine;hydrochloride::3-(2-chloro-5,6-dihydrobenzo[b][1]benzazepin-11-yl)-N,N-dimethyl-1-propanamine;hydrochloride::3-(2-chloro-5,6-dihydrobenzo[b][1]benzazepin-11-yl)-N,N-dimethylpropan-1-amine;hydrochloride::3-(2-chloro-5,6-dihydrobenzo[b][1]benzazepin-11-yl)propyl-dimethyl-amine;hydrochloride::CHLORIMIPRAMINE::CLOMIPRA…	3C-like proteinase (3CL-PRO)	Human SARS coronavirus				13230	10.1002/med.21724	http://www.bindingdb.org/jsp/dbsearch/PrimarySearch_ki.jsp?energyterm=kJ/mole&tag=r21&monomerid=77970&enzyme=3C-like+proteinase+%283CL-PRO%29&column=ki&startPg=0&Increment=50&submit=Search	2801		DB01242
869023	CN1CCN(Cc2ccc(cc2)C(=O)Nc2ccc(C)c(Nc3nccc(n3)-c3cccnc3)c2)CC1	KTUFNOKKBVMGRW-UHFFFAOYSA-N	4-[(4-methylpiperazin-1-yl)methyl]-N-[4-methyl-3-[(4-pyridin-3-ylpyrimidin-2-yl)amino]phenyl]benzamide::CHEMBL941::Gleevec::IMATINIB::Imatinib::Imatinib, 21::N-(4-methyl-3-{[4-(pyridin-3-yl)pyrimidin-2-yl]amino}phenyl)-4-[(4-methylpiperazin-1-yl)methyl]benzamide::STI-571::STI571::US9255107, Imatinib::cid_5291::imatinib-CD3::med.21724, Compound 6	3C-like proteinase (3CL-PRO)	Human SARS coronavirus				9820	10.1002/med.21724	http://www.bindingdb.org/jsp/dbsearch/PrimarySearch_ki.jsp?energyterm=kJ/mole&tag=r21&monomerid=13530&enzyme=3C-like+proteinase+%283CL-PRO%29&column=ki&startPg=0&Increment=50&submit=Search	5291	CHEMBL941	DB00619	ZINC19632618
869025	Cc1nc(Nc2ncc(s2)C(=O)Nc2c(C)cccc2Cl)cc(n1)N1CCN(CCO)CC1	ZBNZXTGUTAYRHI-UHFFFAOYSA-N	BMS-354825::CHEMBL1421::DASATINIB::N-(2-Chloro-6-methylphenyl)-2-[[6-[4-(2-hydroxyethyl)-1-piperazinyl)]-2-methyl-4-pyrimidinyl]amino)]-1,3-thiazole-5-carboxamide::N-(2-chloro-6-methylphenyl)-2-({6-[4-(2-hydroxyethyl)piperazin-1-yl]-2-methylpyrimidin-4-yl}amino)-1,3-thiazole-5-carboxamide::US10294227, Code Dasatinib::cid_3062316::med.21724, Compound Dasatinib	3C-like proteinase (3CL-PRO)	Human SARS coronavirus				51	10.1002/med.21724	http://www.bindingdb.org/jsp/dbsearch/PrimarySearch_ki.jsp?energyterm=kJ/mole&tag=r21&monomerid=13216&enzyme=3C-like+proteinase+%283CL-PRO%29&column=ki&startPg=0&Increment=50&submit=Search	3062316	CHEMBL1421	DB01254	ZINC21982951
902204	CCN(CC)C(=S)SSC(=S)N(CC)CC	AUZONCFQVSMFAP-UHFFFAOYSA-N	1,1',1'',1'''-[disulfanediylbis(carbonothioylnitrilo)]tetraethane::1,1'-dithiobis(N,N-diethylthioformamide)::Antabuse (TN)::CHEMBL964::DISULFIRAM::N,N,N',N'-tetraethylthiuram disulfide::N,N-diethyl[(diethylcarbamothioyl)disulfanyl]carbothioamide (G5)::bis(diethylthiocarbamoyl) disulfide::cid_3117::med.21724, Compound 151::tetraethylthioperoxydicarbonic diamide::tetraethylthiuram disulfide::tetrae…	3C-like proteinase (3CL-PRO)	Human SARS coronavirus		26750			10.1101/2020.12.16.422677	http://www.bindingdb.org/jsp/dbsearch/PrimarySearch_ki.jsp?energyterm=kJ/mole&tag=r21&monomerid=50058655&enzyme=3C-like+proteinase+%283CL-PRO%29&column=ki&startPg=0&Increment=50&submit=Search	3117	CHEMBL964	DB00822	ZINC01529266
987455	OC[C@H]1O[C@H](C(O)[C@H]1O)n1ccc(NO)nc1=O	XCUAIINAJCDIPM-JDNPWWSISA-N	US10874683, Example 00106::US10874683, Example 56.1::US10874683, Example EIDD-01931-04::US10874683, Example EIDD-02200-01::US10874683, Example EIDD-02261-01::US10874683, Example EIDD-02345-01::US10874683, Example EIDD-02416-01	3C-like proteinase (3CL-PRO)	Human SARS coronavirus				<380		http://www.bindingdb.org/jsp/dbsearch/PrimarySearch_ki.jsp?energyterm=kJ/mole&tag=r21&monomerid=476299&enzyme=3C-like+proteinase+%283CL-PRO%29&column=ki&startPg=0&Increment=50&submit=Search	59065847
987456	CCCCCCCCC(=O)ONc1ccn([C@@H]2O[C@H](CO)[C@H](O)C2O)c(=O)n1	CAIBSWAHCOWADJ-GCTJPBAQSA-N	US10874683, Example 56.2	3C-like proteinase (3CL-PRO)	Human SARS coronavirus				480		http://www.bindingdb.org/jsp/dbsearch/PrimarySearch_ki.jsp?energyterm=kJ/mole&tag=r21&monomerid=476300&enzyme=3C-like+proteinase+%283CL-PRO%29&column=ki&startPg=0&Increment=50&submit=Search	145767925
987457	CCCCCCCOC(=O)ONc1ccn([C@@H]2O[C@H](CO)[C@H](O)C2O)c(=O)n1	IKANHRUWKBEOQI-XENFMFCUSA-N	US10874683, Example 56.3	3C-like proteinase (3CL-PRO)	Human SARS coronavirus				700		http://www.bindingdb.org/jsp/dbsearch/PrimarySearch_ki.jsp?energyterm=kJ/mole&tag=r21&monomerid=476301&enzyme=3C-like+proteinase+%283CL-PRO%29&column=ki&startPg=0&Increment=50&submit=Search	145767940
987458	CONc1ccn([C@@H]2O[C@H](CO)[C@H](O)C2O)c(=O)n1	DKECHCKZSSDTKD-DYZKPSFTSA-N	US10874683, Example 56.4	3C-like proteinase (3CL-PRO)	Human SARS coronavirus				>366000		http://www.bindingdb.org/jsp/dbsearch/PrimarySearch_ki.jsp?energyterm=kJ/mole&tag=r21&monomerid=476302&enzyme=3C-like+proteinase+%283CL-PRO%29&column=ki&startPg=0&Increment=50&submit=Search	145767935
987460	CC1(O)[C@@H](O)[C@@H](CO)O[C@H]1n1ccc(NO)nc1=O	PLFFPFSZKBSXEP-PELMPBBBSA-N	US10874683, Example 56.5::US10874683, Example EIDD-02053-01	3C-like proteinase (3CL-PRO)	Human SARS coronavirus				>100000		http://www.bindingdb.org/jsp/dbsearch/PrimarySearch_ki.jsp?energyterm=kJ/mole&tag=r21&monomerid=476303&enzyme=3C-like+proteinase+%283CL-PRO%29&column=ki&startPg=0&Increment=50&submit=Search	90351105
989756	CC(C)C[C@H](NC(=O)[C@@H](NC(=O)OCc1ccccc1)C(C)C)C(=O)N[C@@H](C[C@@H]1CCNC1=O)C(=O)c1nc2ccccc2s1	KSCRVOKQPYZBHZ-IXPOFIJOSA-N	peptidomimetic coronavirus 3CLpro inhibitors 2i	3C-like proteinase (3CL-PRO)	Human SARS coronavirus		94				http://www.bindingdb.org/jsp/dbsearch/PrimarySearch_ki.jsp?energyterm=kJ/mole&tag=r21&monomerid=476960&enzyme=3C-like+proteinase+%283CL-PRO%29&column=ki&startPg=0&Increment=50&submit=Search	71508882
989757	CC(C)C[C@H](NC(=O)[C@@H](NC(=O)OCc1ccccc1)C(C)C)C(=O)N[C@@H](C[C@@H]1CCNC1=O)C(=O)c1nc2ccccc2s1	KSCRVOKQPYZBHZ-IXPOFIJOSA-N	peptidomimetic coronavirus 3CLpro inhibitors 2i	3C-like proteinase (3CL-PRO)	Human SARS coronavirus		1700				http://www.bindingdb.org/jsp/dbsearch/PrimarySearch_ki.jsp?energyterm=kJ/mole&tag=r21&monomerid=476960&enzyme=3C-like+proteinase+%283CL-PRO%29&column=ki&startPg=0&Increment=50&submit=Search	71508882
989758	CCOC(=O)\C=C\[C@H](C[C@@H]1CCNC1=O)NC(=O)[C@H](CC(C)C)NC(=O)[C@@H](NC(=O)OCc1ccccc1)C(C)C	WDMSWWUPIMEGNZ-SGFFKCJDSA-N	N-[(benzyloxy)carbonyl]-L-valyl-N1-((1S,2E)-4-ethoxy-4-oxo-1-{[(3S)-2-oxopyrrolidin-3-yl]methyl}but-2-enyl)-L-leucinamide::TG-0205221 Analogue 3::ethyl (2E,4S)-4-[(2S)-2-[(2S)-2-{[(benzyloxy)carbonyl]amino}-3-methylbutanamido]-4-methylpentanamido]-5-[(3S)-2-oxopyrrolidin-3-yl]pent-2-enoate::peptidomimetic coronavirus 3CLpro inhibitors 3	3C-like proteinase (3CL-PRO)	Human SARS coronavirus		286				http://www.bindingdb.org/jsp/dbsearch/PrimarySearch_ki.jsp?energyterm=kJ/mole&tag=r21&monomerid=11231&enzyme=3C-like+proteinase+%283CL-PRO%29&column=ki&startPg=0&Increment=50&submit=Search	11444522			ZINC14947858
989759	CCOC(=O)\C=C\[C@H](C[C@@H]1CCNC1=O)NC(=O)[C@H](CC(C)C)NC(=O)[C@@H](NC(=O)OCc1ccccc1)C(C)C	WDMSWWUPIMEGNZ-SGFFKCJDSA-N	N-[(benzyloxy)carbonyl]-L-valyl-N1-((1S,2E)-4-ethoxy-4-oxo-1-{[(3S)-2-oxopyrrolidin-3-yl]methyl}but-2-enyl)-L-leucinamide::TG-0205221 Analogue 3::ethyl (2E,4S)-4-[(2S)-2-[(2S)-2-{[(benzyloxy)carbonyl]amino}-3-methylbutanamido]-4-methylpentanamido]-5-[(3S)-2-oxopyrrolidin-3-yl]pent-2-enoate::peptidomimetic coronavirus 3CLpro inhibitors 3	3C-like proteinase (3CL-PRO)	Human SARS coronavirus	660					http://www.bindingdb.org/jsp/dbsearch/PrimarySearch_ki.jsp?energyterm=kJ/mole&tag=r21&monomerid=11231&enzyme=3C-like+proteinase+%283CL-PRO%29&column=ki&startPg=0&Increment=50&submit=Search	11444522			ZINC14947858
989765	CC(C)C[C@H](NC(=O)[C@@H](NC(=O)OCc1ccccc1)C(C)C)C(=O)N[C@@H](C[C@@H]1CCNC1=O)C(=O)C(=O)N(C)C	MLMGWGFHIFVPAJ-MLCQCVOFSA-N	peptidomimetic coronavirus 3CLpro inhibitors 17	3C-like proteinase (3CL-PRO)	Human SARS coronavirus		65				http://www.bindingdb.org/jsp/dbsearch/PrimarySearch_ki.jsp?energyterm=kJ/mole&tag=r21&monomerid=476979&enzyme=3C-like+proteinase+%283CL-PRO%29&column=ki&startPg=0&Increment=50&submit=Search	156023324
989766	CC(C)C[C@H](NC(=O)[C@@H](NC(=O)OCc1ccccc1)C(C)C)C(=O)N[C@@H](C[C@@H]1CCNC1=O)C(=O)C(=O)N(C)C	MLMGWGFHIFVPAJ-MLCQCVOFSA-N	peptidomimetic coronavirus 3CLpro inhibitors 17	3C-like proteinase (3CL-PRO)	Human SARS coronavirus		7.00				http://www.bindingdb.org/jsp/dbsearch/PrimarySearch_ki.jsp?energyterm=kJ/mole&tag=r21&monomerid=476979&enzyme=3C-like+proteinase+%283CL-PRO%29&column=ki&startPg=0&Increment=50&submit=Search	156023324
989767	CC(C)C[C@H](NC(=O)OCc1ccccc1)C(=O)N[C@@H](C[C@@H]1CCNC1=O)C(=O)c1nc2ccccc2s1	AJRQIXBBIDPNGK-BVSLBCMMSA-N	peptidomimetic coronavirus 3CLpro inhibitors 25c	3C-like proteinase (3CL-PRO)	Human SARS coronavirus		>10000				http://www.bindingdb.org/jsp/dbsearch/PrimarySearch_ki.jsp?energyterm=kJ/mole&tag=r21&monomerid=476980&enzyme=3C-like+proteinase+%283CL-PRO%29&column=ki&startPg=0&Increment=50&submit=Search	71739586
989768	CC(C)C[C@H](NC(=O)OCc1ccccc1)C(=O)N[C@@H](C[C@@H]1CCNC1=O)C(=O)c1nc2ccccc2s1	AJRQIXBBIDPNGK-BVSLBCMMSA-N	peptidomimetic coronavirus 3CLpro inhibitors 25c	3C-like proteinase (3CL-PRO)	Human SARS coronavirus		210000				http://www.bindingdb.org/jsp/dbsearch/PrimarySearch_ki.jsp?energyterm=kJ/mole&tag=r21&monomerid=476980&enzyme=3C-like+proteinase+%283CL-PRO%29&column=ki&startPg=0&Increment=50&submit=Search	71739586
989784	COc1cccc2[nH]c(cc12)C(=O)N[C@@H](CC(C)C)C(=O)N[C@@H](C[C@@H]1CCNC1=O)C(=O)CO	QDIMHKWNHMVDJB-WBAXXEDZSA-N	PF-00835231::PF-0835231::WO2005113580-Ex-02	3C-like proteinase (3CL-PRO)	Human SARS coronavirus		8.00				http://www.bindingdb.org/jsp/dbsearch/PrimarySearch_ki.jsp?energyterm=kJ/mole&tag=r21&monomerid=420298&enzyme=3C-like+proteinase+%283CL-PRO%29&column=ki&startPg=0&Increment=50&submit=Search
989785	COc1cccc2[nH]c(cc12)C(=O)N[C@@H](CC(C)C)C(=O)N[C@@H](C[C@@H]1CCNC1=O)C(=O)CO	QDIMHKWNHMVDJB-WBAXXEDZSA-N	PF-00835231::PF-0835231::WO2005113580-Ex-02	3C-like proteinase (3CL-PRO)	Human SARS coronavirus		4.00				http://www.bindingdb.org/jsp/dbsearch/PrimarySearch_ki.jsp?energyterm=kJ/mole&tag=r21&monomerid=420298&enzyme=3C-like+proteinase+%283CL-PRO%29&column=ki&startPg=0&Increment=50&submit=Search
989788	CC(OC(C)(C)C)[C@H](NC(=O)OCc1ccccc1)C(=O)N[C@@H](CC1CCCCC1)C(=O)N[C@@H](CC1CCNC1=O)C=O	YFUZVOLEKQFVCQ-IIACSLLASA-N	TG-0205221	3C-like proteinase (3CL-PRO)	Human SARS coronavirus		9.00				http://www.bindingdb.org/jsp/dbsearch/PrimarySearch_ki.jsp?energyterm=kJ/mole&tag=r21&monomerid=476989&enzyme=3C-like+proteinase+%283CL-PRO%29&column=ki&startPg=0&Increment=50&submit=Search	49771527
989789	CC(OC(C)(C)C)[C@H](NC(=O)OCc1ccccc1)C(=O)N[C@@H](CC1CCCCC1)C(=O)N[C@@H](CC1CCNC1=O)C=O	YFUZVOLEKQFVCQ-IIACSLLASA-N	TG-0205221	3C-like proteinase (3CL-PRO)	Human SARS coronavirus	53					http://www.bindingdb.org/jsp/dbsearch/PrimarySearch_ki.jsp?energyterm=kJ/mole&tag=r21&monomerid=476989&enzyme=3C-like+proteinase+%283CL-PRO%29&column=ki&startPg=0&Increment=50&submit=Search	49771527
995718	O=C(Cn1nnc2ccccc12)N(Cc1ccsc1)c1ccc(NC(=O)C2CC2)cc1	OCKMJWOFMCSMEX-UHFFFAOYSA-N	ML300-based SC inhibitor 1	3C-like proteinase (3CL-PRO)	Human SARS coronavirus		4450				http://www.bindingdb.org/jsp/dbsearch/PrimarySearch_ki.jsp?energyterm=kJ/mole&tag=r21&monomerid=479369&enzyme=3C-like+proteinase+%283CL-PRO%29&column=ki&startPg=0&Increment=50&submit=Search
995722	O=C(Cn1nnc2ccccc12)N(Cc1ccsc1)c1ccc(cc1)-c1ccccc1	BRLBTOJQLXGOHO-UHFFFAOYSA-N	ML300-based SC inhibitor 7::med.21724, Compound 137	3C-like proteinase (3CL-PRO)	Human SARS coronavirus		16820				http://www.bindingdb.org/jsp/dbsearch/PrimarySearch_ki.jsp?energyterm=kJ/mole&tag=r21&monomerid=429465&enzyme=3C-like+proteinase+%283CL-PRO%29&column=ki&startPg=0&Increment=50&submit=Search	56973489
995724	O=C(Cn1nnc2ccccc12)N(Cc1ccsc1)c1ccc(cc1)-c1cccnc1	LHBIUOYHJIXRST-UHFFFAOYSA-N	ML300-based SC inhibitor 8::med.21724, Compound 136	3C-like proteinase (3CL-PRO)	Human SARS coronavirus		930				http://www.bindingdb.org/jsp/dbsearch/PrimarySearch_ki.jsp?energyterm=kJ/mole&tag=r21&monomerid=429464&enzyme=3C-like+proteinase+%283CL-PRO%29&column=ki&startPg=0&Increment=50&submit=Search	56973495
995728	O=C(Cn1nnc2ccccc12)N(Cc1ccsc1)c1ccccc1	BDMCAWVDUSVNBO-UHFFFAOYSA-N	ML300-based SC inhibitor 9	3C-like proteinase (3CL-PRO)	Human SARS coronavirus		19730				http://www.bindingdb.org/jsp/dbsearch/PrimarySearch_ki.jsp?energyterm=kJ/mole&tag=r21&monomerid=479470&enzyme=3C-like+proteinase+%283CL-PRO%29&column=ki&startPg=0&Increment=50&submit=Search
995730	NC(=O)c1ccc(cc1)N(Cc1ccsc1)C(=O)Cn1nnc2ccccc12	AMNRXIOJAADJRF-UHFFFAOYSA-N	ML300-based SC inhibitor 10	3C-like proteinase (3CL-PRO)	Human SARS coronavirus		380				http://www.bindingdb.org/jsp/dbsearch/PrimarySearch_ki.jsp?energyterm=kJ/mole&tag=r21&monomerid=479471&enzyme=3C-like+proteinase+%283CL-PRO%29&column=ki&startPg=0&Increment=50&submit=Search
995732	O=C(Cn1nnc2ccccc12)N(Cc1ccsc1)c1ccc(cc1)C(=O)NC1CC1	UTWHGTFVFPLUKB-UHFFFAOYSA-N	ML300-based SC inhibitor 11	3C-like proteinase (3CL-PRO)	Human SARS coronavirus		16550				http://www.bindingdb.org/jsp/dbsearch/PrimarySearch_ki.jsp?energyterm=kJ/mole&tag=r21&monomerid=479472&enzyme=3C-like+proteinase+%283CL-PRO%29&column=ki&startPg=0&Increment=50&submit=Search
995734	CS(=O)(=O)Nc1ccc(cc1)N(Cc1ccsc1)C(=O)Cn1nnc2ccccc12	PAOYPYMKBNVXRO-UHFFFAOYSA-N	ML300-based SC inhibitor 12	3C-like proteinase (3CL-PRO)	Human SARS coronavirus		1400				http://www.bindingdb.org/jsp/dbsearch/PrimarySearch_ki.jsp?energyterm=kJ/mole&tag=r21&monomerid=479473&enzyme=3C-like+proteinase+%283CL-PRO%29&column=ki&startPg=0&Increment=50&submit=Search
995736	O=C(Cn1nnc2ccccc12)N(Cc1ccsc1)c1ccc(NS(=O)(=O)C2CC2)cc1	WMGPUGILOFJULP-UHFFFAOYSA-N	ML300-based SC inhibitor 13	3C-like proteinase (3CL-PRO)	Human SARS coronavirus		7980				http://www.bindingdb.org/jsp/dbsearch/PrimarySearch_ki.jsp?energyterm=kJ/mole&tag=r21&monomerid=479474&enzyme=3C-like+proteinase+%283CL-PRO%29&column=ki&startPg=0&Increment=50&submit=Search
995738	O=C(Cn1nnc2ccccc12)N(Cc1ccsc1)c1ccc(cc1)-c1ccccn1	ICGCVDLDCRLNGJ-UHFFFAOYSA-N	ML300-based SC inhibitor 14	3C-like proteinase (3CL-PRO)	Human SARS coronavirus		900				http://www.bindingdb.org/jsp/dbsearch/PrimarySearch_ki.jsp?energyterm=kJ/mole&tag=r21&monomerid=479475&enzyme=3C-like+proteinase+%283CL-PRO%29&column=ki&startPg=0&Increment=50&submit=Search
995740	O=C(Cn1nnc2ccccc12)N(Cc1ccsc1)c1ccc(cc1)-c1ccncc1	ZFYLJRHNLKAHPV-UHFFFAOYSA-N	ML300-based SC inhibitor 15	3C-like proteinase (3CL-PRO)	Human SARS coronavirus		1570				http://www.bindingdb.org/jsp/dbsearch/PrimarySearch_ki.jsp?energyterm=kJ/mole&tag=r21&monomerid=479476&enzyme=3C-like+proteinase+%283CL-PRO%29&column=ki&startPg=0&Increment=50&submit=Search
995742	COc1ncccc1-c1ccc(cc1)N(Cc1ccsc1)C(=O)Cn1nnc2ccccc12	NGIZLVDUIAGJQR-UHFFFAOYSA-N	ML300-based SC inhibitor 16	3C-like proteinase (3CL-PRO)	Human SARS coronavirus		3090				http://www.bindingdb.org/jsp/dbsearch/PrimarySearch_ki.jsp?energyterm=kJ/mole&tag=r21&monomerid=479477&enzyme=3C-like+proteinase+%283CL-PRO%29&column=ki&startPg=0&Increment=50&submit=Search
995744	O=C(Cn1nnc2ccccc12)N(Cc1ccsc1)c1ccc(cc1)-c1ccc[nH]c1=O	AZBYGSYNZGNIEI-UHFFFAOYSA-N	ML300-based SC inhibitor 17	3C-like proteinase (3CL-PRO)	Human SARS coronavirus		780				http://www.bindingdb.org/jsp/dbsearch/PrimarySearch_ki.jsp?energyterm=kJ/mole&tag=r21&monomerid=479478&enzyme=3C-like+proteinase+%283CL-PRO%29&column=ki&startPg=0&Increment=50&submit=Search
995746	Cn1cc(cn1)-c1ccc(cc1)N(Cc1ccsc1)C(=O)Cn1nnc2ccccc12	MHMNSHNWWVMPDA-UHFFFAOYSA-N	ML300-based SC inhibitor 18	3C-like proteinase (3CL-PRO)	Human SARS coronavirus		22780				http://www.bindingdb.org/jsp/dbsearch/PrimarySearch_ki.jsp?energyterm=kJ/mole&tag=r21&monomerid=479479&enzyme=3C-like+proteinase+%283CL-PRO%29&column=ki&startPg=0&Increment=50&submit=Search
995748	O=C(Cn1nnc2ccccc12)N(Cc1ccsc1)c1ccc(cc1)-c1cn[nH]c1	PYVQFTGANJRGEP-UHFFFAOYSA-N	ML300-based SC inhibitor 19	3C-like proteinase (3CL-PRO)	Human SARS coronavirus		110				http://www.bindingdb.org/jsp/dbsearch/PrimarySearch_ki.jsp?energyterm=kJ/mole&tag=r21&monomerid=479480&enzyme=3C-like+proteinase+%283CL-PRO%29&column=ki&startPg=0&Increment=50&submit=Search
995752	Cn1cnc(c1)-c1ccc(cc1)N(Cc1ccsc1)C(=O)Cn1nnc2ccccc12	IIHIUQOLONBIHR-UHFFFAOYSA-N	ML300-based SC inhibitor 20	3C-like proteinase (3CL-PRO)	Human SARS coronavirus		11310				http://www.bindingdb.org/jsp/dbsearch/PrimarySearch_ki.jsp?energyterm=kJ/mole&tag=r21&monomerid=479481&enzyme=3C-like+proteinase+%283CL-PRO%29&column=ki&startPg=0&Increment=50&submit=Search
995754	O=C(Cn1nnc2ccccc12)N(Cc1ccsc1)c1ccc(cc1)-c1c[nH]cn1	XZJQABWECIWHRU-UHFFFAOYSA-N	ML300-based SC inhibitor 21	3C-like proteinase (3CL-PRO)	Human SARS coronavirus		150				http://www.bindingdb.org/jsp/dbsearch/PrimarySearch_ki.jsp?energyterm=kJ/mole&tag=r21&monomerid=479482&enzyme=3C-like+proteinase+%283CL-PRO%29&column=ki&startPg=0&Increment=50&submit=Search
995758	CC(C)CCN(C(=O)Cn1nnc2ccccc12)c1ccc(cc1)-c1cccnc1	OQGTZTSFRMUFBA-UHFFFAOYSA-N	ML300-based SC inhibitor 22	3C-like proteinase (3CL-PRO)	Human SARS coronavirus		4210				http://www.bindingdb.org/jsp/dbsearch/PrimarySearch_ki.jsp?energyterm=kJ/mole&tag=r21&monomerid=479483&enzyme=3C-like+proteinase+%283CL-PRO%29&column=ki&startPg=0&Increment=50&submit=Search
995760	O=C(Cn1nnc2ccccc12)N(CC1CC1)c1ccc(cc1)-c1cccnc1	CIABYILRZWPLFX-UHFFFAOYSA-N	ML300-based SC inhibitor 23	3C-like proteinase (3CL-PRO)	Human SARS coronavirus		2440				http://www.bindingdb.org/jsp/dbsearch/PrimarySearch_ki.jsp?energyterm=kJ/mole&tag=r21&monomerid=479484&enzyme=3C-like+proteinase+%283CL-PRO%29&column=ki&startPg=0&Increment=50&submit=Search
995762	O=C(Cn1nnc2ccccc12)N(CC1CCC1)c1ccc(cc1)-c1cccnc1	DLTPUSCBKNOVLV-UHFFFAOYSA-N	ML300-based SC inhibitor 24	3C-like proteinase (3CL-PRO)	Human SARS coronavirus		780				http://www.bindingdb.org/jsp/dbsearch/PrimarySearch_ki.jsp?energyterm=kJ/mole&tag=r21&monomerid=479485&enzyme=3C-like+proteinase+%283CL-PRO%29&column=ki&startPg=0&Increment=50&submit=Search
995764	O=C(Cn1nnc2ccccc12)N(CC1CCCC1)c1ccc(cc1)-c1cccnc1	MUXXBMHXURKPHX-UHFFFAOYSA-N	ML300-based SC inhibitor 25	3C-like proteinase (3CL-PRO)	Human SARS coronavirus		1000				http://www.bindingdb.org/jsp/dbsearch/PrimarySearch_ki.jsp?energyterm=kJ/mole&tag=r21&monomerid=479486&enzyme=3C-like+proteinase+%283CL-PRO%29&column=ki&startPg=0&Increment=50&submit=Search
995766	O=C(Cn1nnc2ccccc12)N(CC1CCOC1)c1ccc(cc1)-c1cccnc1	YPAJVLNWSXODGF-UHFFFAOYSA-N	ML300-based SC inhibitor 26	3C-like proteinase (3CL-PRO)	Human SARS coronavirus		20500				http://www.bindingdb.org/jsp/dbsearch/PrimarySearch_ki.jsp?energyterm=kJ/mole&tag=r21&monomerid=479487&enzyme=3C-like+proteinase+%283CL-PRO%29&column=ki&startPg=0&Increment=50&submit=Search
995768	O=C(Cn1nnc2ccccc12)N(Cc1cscn1)c1ccc(cc1)-c1cccnc1	SDKAWNSLJAJOGE-UHFFFAOYSA-N	ML300-based SC inhibitor 27	3C-like proteinase (3CL-PRO)	Human SARS coronavirus		1130				http://www.bindingdb.org/jsp/dbsearch/PrimarySearch_ki.jsp?energyterm=kJ/mole&tag=r21&monomerid=479488&enzyme=3C-like+proteinase+%283CL-PRO%29&column=ki&startPg=0&Increment=50&submit=Search
995770	Clc1cccc(CN(C(=O)Cn2nnc3ccccc23)c2ccc(cc2)-c2cccnc2)c1	QLYAVYHRKCZVAB-UHFFFAOYSA-N	ML300-based SC inhibitor 28	3C-like proteinase (3CL-PRO)	Human SARS coronavirus		250				http://www.bindingdb.org/jsp/dbsearch/PrimarySearch_ki.jsp?energyterm=kJ/mole&tag=r21&monomerid=479489&enzyme=3C-like+proteinase+%283CL-PRO%29&column=ki&startPg=0&Increment=50&submit=Search
995774	Fc1ccc(CN(C(=O)Cn2nnc3ccccc23)c2ccc(cc2)-c2cccnc2)cc1Cl	LBNKWIIALDNORK-UHFFFAOYSA-N	ML300-based SC inhibitor 29	3C-like proteinase (3CL-PRO)	Human SARS coronavirus		4870				http://www.bindingdb.org/jsp/dbsearch/PrimarySearch_ki.jsp?energyterm=kJ/mole&tag=r21&monomerid=479490&enzyme=3C-like+proteinase+%283CL-PRO%29&column=ki&startPg=0&Increment=50&submit=Search
995776	Fc1cc(Cl)cc(CN(C(=O)Cn2nnc3ccccc23)c2ccc(cc2)-c2cccnc2)c1	UHMIVSNGFNZGBS-UHFFFAOYSA-N	ML300-based SC inhibitor 31	3C-like proteinase (3CL-PRO)	Human SARS coronavirus		74				http://www.bindingdb.org/jsp/dbsearch/PrimarySearch_ki.jsp?energyterm=kJ/mole&tag=r21&monomerid=479492&enzyme=3C-like+proteinase+%283CL-PRO%29&column=ki&startPg=0&Increment=50&submit=Search
995778	Clc1cc(Cl)cc(CN(C(=O)Cn2nnc3ccccc23)c2ccc(cc2)-c2cccnc2)c1	FXOXREWVQYLPFR-UHFFFAOYSA-N	ML300-based SC inhibitor 32	3C-like proteinase (3CL-PRO)	Human SARS coronavirus		111				http://www.bindingdb.org/jsp/dbsearch/PrimarySearch_ki.jsp?energyterm=kJ/mole&tag=r21&monomerid=479493&enzyme=3C-like+proteinase+%283CL-PRO%29&column=ki&startPg=0&Increment=50&submit=Search
995780	Cc1cc(Cl)cc(CN(C(=O)Cn2nnc3ccccc23)c2ccc(cc2)-c2cccnc2)c1	YYPWVCNJTBELIN-UHFFFAOYSA-N	ML300-based SC inhibitor 33	3C-like proteinase (3CL-PRO)	Human SARS coronavirus		418				http://www.bindingdb.org/jsp/dbsearch/PrimarySearch_ki.jsp?energyterm=kJ/mole&tag=r21&monomerid=479494&enzyme=3C-like+proteinase+%283CL-PRO%29&column=ki&startPg=0&Increment=50&submit=Search
995782	Clc1cncc(CN(C(=O)Cn2nnc3ccccc23)c2ccc(cc2)-c2cccnc2)c1	AZRNSMNPERAERM-UHFFFAOYSA-N	ML300-based SC inhibitor 34	3C-like proteinase (3CL-PRO)	Human SARS coronavirus		370				http://www.bindingdb.org/jsp/dbsearch/PrimarySearch_ki.jsp?energyterm=kJ/mole&tag=r21&monomerid=479495&enzyme=3C-like+proteinase+%283CL-PRO%29&column=ki&startPg=0&Increment=50&submit=Search
995784	Clc1cccc(CN(C(=O)Cn2nnc3ccccc23)c2ccc(cc2)-c2ccc[nH]c2=O)c1	OMFBUEFMMHUWOX-UHFFFAOYSA-N	ML300-based SC inhibitor 35	3C-like proteinase (3CL-PRO)	Human SARS coronavirus		657				http://www.bindingdb.org/jsp/dbsearch/PrimarySearch_ki.jsp?energyterm=kJ/mole&tag=r21&monomerid=479496&enzyme=3C-like+proteinase+%283CL-PRO%29&column=ki&startPg=0&Increment=50&submit=Search
995788	Clc1cccc(CN(C(=O)Cn2nnc3ccccc23)c2ccc(cc2)-c2cn[nH]c2)c1	JNKQPWXEHPYJAU-UHFFFAOYSA-N	ML300-based SC inhibitor 36	3C-like proteinase (3CL-PRO)	Human SARS coronavirus		334				http://www.bindingdb.org/jsp/dbsearch/PrimarySearch_ki.jsp?energyterm=kJ/mole&tag=r21&monomerid=479497&enzyme=3C-like+proteinase+%283CL-PRO%29&column=ki&startPg=0&Increment=50&submit=Search
995792	COc1cc(ccc1-c1cn[nH]c1)N(Cc1cccc(Cl)c1)C(=O)Cn1nnc2ccccc12	ZUSJSFVCQUBXFQ-UHFFFAOYSA-N	ML300-based SC inhibitor 37	3C-like proteinase (3CL-PRO)	Human SARS coronavirus		206				http://www.bindingdb.org/jsp/dbsearch/PrimarySearch_ki.jsp?energyterm=kJ/mole&tag=r21&monomerid=479498&enzyme=3C-like+proteinase+%283CL-PRO%29&column=ki&startPg=0&Increment=50&submit=Search
995796	COc1cc(ccc1N(Cc1cccc(Cl)c1)C(=O)Cn1nnc2ccccc12)-c1cn[nH]c1	ZJWZLVITQIYDKL-UHFFFAOYSA-N	ML300-based SC inhibitor 38	3C-like proteinase (3CL-PRO)	Human SARS coronavirus		208				http://www.bindingdb.org/jsp/dbsearch/PrimarySearch_ki.jsp?energyterm=kJ/mole&tag=r21&monomerid=479499&enzyme=3C-like+proteinase+%283CL-PRO%29&column=ki&startPg=0&Increment=50&submit=Search
995800	Clc1cccc(CN(C(=O)Cn2nnc3ccccc23)c2ccc(nc2)-c2cn[nH]c2)c1	WCLFFPWYAFAVEX-UHFFFAOYSA-N	ML300-based SC inhibitor 39	3C-like proteinase (3CL-PRO)	Human SARS coronavirus		336				http://www.bindingdb.org/jsp/dbsearch/PrimarySearch_ki.jsp?energyterm=kJ/mole&tag=r21&monomerid=479500&enzyme=3C-like+proteinase+%283CL-PRO%29&column=ki&startPg=0&Increment=50&submit=Search
995804	Clc1cccc(CN(C(=O)Cn2nnc3ccccc23)c2ccc(cn2)-c2cn[nH]c2)c1	GITOTVPGLSPTSF-UHFFFAOYSA-N	ML300-based SC inhibitor 40	3C-like proteinase (3CL-PRO)	Human SARS coronavirus		214				http://www.bindingdb.org/jsp/dbsearch/PrimarySearch_ki.jsp?energyterm=kJ/mole&tag=r21&monomerid=479501&enzyme=3C-like+proteinase+%283CL-PRO%29&column=ki&startPg=0&Increment=50&submit=Search
995808	Clc1cccc(CN(C(=O)Cn2nnc3ccccc23)c2ccc(cc2)-c2c[nH]cn2)c1	NQTRFDLUODRJKC-UHFFFAOYSA-N	ML300-based SC inhibitor 41	3C-like proteinase (3CL-PRO)	Human SARS coronavirus		19				http://www.bindingdb.org/jsp/dbsearch/PrimarySearch_ki.jsp?energyterm=kJ/mole&tag=r21&monomerid=479502&enzyme=3C-like+proteinase+%283CL-PRO%29&column=ki&startPg=0&Increment=50&submit=Search
995812	Clc1cccc(CN(C(=O)Cc2cccnc2)c2ccc(cc2)-c2cn[nH]c2)c1	LLFIKGDQQRLTFJ-UHFFFAOYSA-N	ML300-based SC inhibitor 42	3C-like proteinase (3CL-PRO)	Human SARS coronavirus		864				http://www.bindingdb.org/jsp/dbsearch/PrimarySearch_ki.jsp?energyterm=kJ/mole&tag=r21&monomerid=479503&enzyme=3C-like+proteinase+%283CL-PRO%29&column=ki&startPg=0&Increment=50&submit=Search
995814	Clc1cccc(CN(C(=O)Cc2cncnc2)c2ccc(cc2)-c2cn[nH]c2)c1	HQKYYKUPSYGXIW-UHFFFAOYSA-N	ML300-based SC inhibitor 43	3C-like proteinase (3CL-PRO)	Human SARS coronavirus		2723				http://www.bindingdb.org/jsp/dbsearch/PrimarySearch_ki.jsp?energyterm=kJ/mole&tag=r21&monomerid=479504&enzyme=3C-like+proteinase+%283CL-PRO%29&column=ki&startPg=0&Increment=50&submit=Search
1003431	CC(C)C[C@H](NC(=O)OCc1ccccc1)C(=O)N[C@@H](CC1CCNC1=O)C(O)S([O-])(=O)=O	BSPZFJDYQHDZNR-ASPXRTSYSA-M	GC-376::GC376	3C-like proteinase (3CL-PRO)	Human SARS coronavirus		44				http://www.bindingdb.org/jsp/dbsearch/PrimarySearch_ki.jsp?energyterm=kJ/mole&tag=r21&monomerid=448319&enzyme=3C-like+proteinase+%283CL-PRO%29&column=ki&startPg=0&Increment=50&submit=Search	146681255
1003432	O=C[C@H](C[C@@H]1CCNC1=O)NC(=O)[C@@H]1[C@H]2CCC[C@H]2CN1C(=O)OCc1ccccc1	XXWDDQJFYNJUCB-HVTWWXFQSA-N	UAWJ9-36-1	3C-like proteinase (3CL-PRO)	Human SARS coronavirus		130				http://www.bindingdb.org/jsp/dbsearch/PrimarySearch_ki.jsp?energyterm=kJ/mole&tag=r21&monomerid=484194&enzyme=3C-like+proteinase+%283CL-PRO%29&column=ki&startPg=0&Increment=50&submit=Search	156596252
1003433	CC1(C)[C@H]2CN([C@@H]([C@@H]12)C(=O)N[C@@H](C[C@@H]1CCNC1=O)C=O)C(=O)OCc1ccccc1	YVCYGQVRUNWVOI-VMXHOPILSA-N	UAWJ9-36-3	3C-like proteinase (3CL-PRO)	Human SARS coronavirus		99				http://www.bindingdb.org/jsp/dbsearch/PrimarySearch_ki.jsp?energyterm=kJ/mole&tag=r21&monomerid=484195&enzyme=3C-like+proteinase+%283CL-PRO%29&column=ki&startPg=0&Increment=50&submit=Search	156596253
1033938	OB(O)c1cc(cc(c1)[N+]([O-])=O)C(=O)Nc1ccc(NC(=O)c2cc(cc(c2)[N+]([O-])=O)B(O)O)cc1	JBHJLTFEEOIBFO-UHFFFAOYSA-N	cmdc.202100576, 4a::jm5b01461, Compound 177	3C-like proteinase (3CL-PRO)	Human SARS coronavirus	22					http://www.bindingdb.org/jsp/dbsearch/PrimarySearch_ki.jsp?energyterm=kJ/mole&tag=r21&monomerid=429360&enzyme=3C-like+proteinase+%283CL-PRO%29&column=ki&startPg=0&Increment=50&submit=Search	5742801
1033939	OB(O)c1cc(cc(c1)[N+]([O-])=O)C(=O)Oc1ccc(OC(=O)c2cc(cc(c2)[N+]([O-])=O)B(O)O)cc1	VHPAREHFOBKUCA-UHFFFAOYSA-N	FL-078::cmdc.202100576, 4b	3C-like proteinase (3CL-PRO)	Human SARS coronavirus	6700					http://www.bindingdb.org/jsp/dbsearch/PrimarySearch_ki.jsp?energyterm=kJ/mole&tag=r21&monomerid=496872&enzyme=3C-like+proteinase+%283CL-PRO%29&column=ki&startPg=0&Increment=50&submit=Search	3009583
1033940	Nc1cc(cc(c1)C(=O)OCc1cccc(c1)B(O)O)B(O)O	RTQOWHQYDIFHJC-UHFFFAOYSA-N	FL-171::cmdc.202100576, 4c	3C-like proteinase (3CL-PRO)	Human SARS coronavirus	3500					http://www.bindingdb.org/jsp/dbsearch/PrimarySearch_ki.jsp?energyterm=kJ/mole&tag=r21&monomerid=496892&enzyme=3C-like+proteinase+%283CL-PRO%29&column=ki&startPg=0&Increment=50&submit=Search	11313064
1033941	OB(O)c1cc(O)cc(c1)C(O)=O	AWFQWXHHINIGNT-UHFFFAOYSA-N	FL-172::cmdc.202100576, 4d	3C-like proteinase (3CL-PRO)	Human SARS coronavirus	3500					http://www.bindingdb.org/jsp/dbsearch/PrimarySearch_ki.jsp?energyterm=kJ/mole&tag=r21&monomerid=496893&enzyme=3C-like+proteinase+%283CL-PRO%29&column=ki&startPg=0&Increment=50&submit=Search	11401141
1033942	OB(O)c1cc(cc(c1)[N+]([O-])=O)C(=O)Oc1c(Cl)cc(Cl)cc1[N+]([O-])=O	RDWLGAJDNWUMHN-UHFFFAOYSA-N	FL-107::cmdc.202100576, 4e	3C-like proteinase (3CL-PRO)	Human SARS coronavirus	6900					http://www.bindingdb.org/jsp/dbsearch/PrimarySearch_ki.jsp?energyterm=kJ/mole&tag=r21&monomerid=496894&enzyme=3C-like+proteinase+%283CL-PRO%29&column=ki&startPg=0&Increment=50&submit=Search	21088112
1033943	CCOC(=O)\C=C\[C@@H](C[C@H]1CCNC1=O)NC(=O)[C@@H](CC(C)C)NC(=O)[C@H](NC(=O)OCc1ccccc1)C(C)OC(C)(C)C	PWBQMVUCCVWDEJ-WCOQIWBNSA-N	TG-0203770::cmdc.202100576, 5b	3C-like proteinase (3CL-PRO)	Human SARS coronavirus	58					http://www.bindingdb.org/jsp/dbsearch/PrimarySearch_ki.jsp?energyterm=kJ/mole&tag=r21&monomerid=496895&enzyme=3C-like+proteinase+%283CL-PRO%29&column=ki&startPg=0&Increment=50&submit=Search	156907356
1033944	CCOC(=O)\C=C\[C@H](C[C@@H]1CCNC1=O)NC(=O)[C@H](CC(C)C)NC(=O)[C@@H](NC(=O)OCc1ccccc1)C(C)C	WDMSWWUPIMEGNZ-SGFFKCJDSA-N	N-[(benzyloxy)carbonyl]-L-valyl-N1-((1S,2E)-4-ethoxy-4-oxo-1-{[(3S)-2-oxopyrrolidin-3-yl]methyl}but-2-enyl)-L-leucinamide::TG-0205221 Analogue 3::cmdc.202100576, 5c::ethyl (2E,4S)-4-[(2S)-2-[(2S)-2-{[(benzyloxy)carbonyl]amino}-3-methylbutanamido]-4-methylpentanamido]-5-[(3S)-2-oxopyrrolidin-3-yl]pent-2-enoate::peptidomimetic coronavirus 3CLpro inhibitors 3	3C-like proteinase (3CL-PRO)	Human SARS coronavirus	660					http://www.bindingdb.org/jsp/dbsearch/PrimarySearch_ki.jsp?energyterm=kJ/mole&tag=r21&monomerid=11231&enzyme=3C-like+proteinase+%283CL-PRO%29&column=ki&startPg=0&Increment=50&submit=Search	11444522			ZINC14947858
1033945	CCOC(=O)\C=C\[C@H](C[C@@H]1CCNC1=O)NC(=O)[C@H](Cc1ccccc1)NC(=O)[C@@H](NC(=O)OCc1ccccc1)C(C)C	MQOSRSSZYUXZNH-XFFCECHOSA-N	AG7088 analogue 2d::CHEMBL277716::N-[(benzyloxy)carbonyl]-L-valyl-N-((1S,2E)-4-ethoxy-4-oxo-1-{[(3S)-2-oxopyrrolidin-3-yl]methyl}but-2-enyl)-L-phenylalaninamide::TG-0205221 Analogue 2::cmdc.202100576, 5d::ethyl (2E,4S)-4-[(2S)-2-[(2S)-2-{[(benzyloxy)carbonyl]amino}-3-methylbutanamido]-3-phenylpropanamido]-5-[(3S)-2-oxopyrrolidin-3-yl]pent-2-enoate	3C-like proteinase (3CL-PRO)	Human SARS coronavirus	2260	85000				http://www.bindingdb.org/jsp/dbsearch/PrimarySearch_ki.jsp?energyterm=kJ/mole&tag=r21&monomerid=11230&enzyme=3C-like+proteinase+%283CL-PRO%29&column=ki&startPg=0&Increment=50&submit=Search	6478229	CHEMBL277716		ZINC14947855
1033946	CC(C)C[C@H](NC(=O)[C@@H](NC(=O)OCc1ccccc1)C(C)OC(C)(C)C)C(=O)N[C@@H](C[C@@H]1CCNC1=O)\C=C\C(=O)OC1CC1	YOAXOCDFFLRJIO-VHGPNYBKSA-N	TG-0205486::cmdc.202100576, 5e	3C-like proteinase (3CL-PRO)	Human SARS coronavirus	99					http://www.bindingdb.org/jsp/dbsearch/PrimarySearch_ki.jsp?energyterm=kJ/mole&tag=r21&monomerid=496898&enzyme=3C-like+proteinase+%283CL-PRO%29&column=ki&startPg=0&Increment=50&submit=Search	156907359
1033947	COC(=O)\C=C\[C@H](C[C@@H]1CCNC1=O)NC(=O)[C@H](CC(C)C)NC(=O)[C@@H](NC(=O)OCc1ccccc1)C(C)NC(=O)C(C)(C)C	KVKPDEXNAXXWLQ-SKPRUEEXSA-N	TG-0204998::cmdc.202100576, 5f	3C-like proteinase (3CL-PRO)	Human SARS coronavirus	38					http://www.bindingdb.org/jsp/dbsearch/PrimarySearch_ki.jsp?energyterm=kJ/mole&tag=r21&monomerid=496899&enzyme=3C-like+proteinase+%283CL-PRO%29&column=ki&startPg=0&Increment=50&submit=Search	156907360
1033948	COc1cccc2[nH]c(cc12)C(=O)N[C@@H](CC(C)C)C(=O)N[C@@H](C[C@@H]1CCNC1=O)C(=O)CO	QDIMHKWNHMVDJB-WBAXXEDZSA-N	PF-00835231::PF-0835231::WO2005113580-Ex-02::cmdc.202100576, 6b	3C-like proteinase (3CL-PRO)	Human SARS coronavirus		4.00				http://www.bindingdb.org/jsp/dbsearch/PrimarySearch_ki.jsp?energyterm=kJ/mole&tag=r21&monomerid=420298&enzyme=3C-like+proteinase+%283CL-PRO%29&column=ki&startPg=0&Increment=50&submit=Search
1033949	CC(C)C[C@H](NC(=O)c1cc2ccccc2[nH]1)C(=O)N[C@@H](C[C@@H]1CCNC1=O)C(=O)CO	KGHYEZHKSVQRJH-SZMVWBNQSA-N	WO2005113580-Ex-05::cmdc.202100576, 6c	3C-like proteinase (3CL-PRO)	Human SARS coronavirus		38				http://www.bindingdb.org/jsp/dbsearch/PrimarySearch_ki.jsp?energyterm=kJ/mole&tag=r21&monomerid=423411&enzyme=3C-like+proteinase+%283CL-PRO%29&column=ki&startPg=0&Increment=50&submit=Search	143139086
1033950	COCC(=O)[C@H](C[C@@H]1CCNC1=O)NC(=O)[C@H](CC(C)C)NC(=O)c1cc2c(OC)cccc2[nH]1	DDBOBUWAMRFUJW-SNRMKQJTSA-N	WO2005113580-Ex-03::cmdc.202100576, 6d	3C-like proteinase (3CL-PRO)	Human SARS coronavirus		51				http://www.bindingdb.org/jsp/dbsearch/PrimarySearch_ki.jsp?energyterm=kJ/mole&tag=r21&monomerid=423410&enzyme=3C-like+proteinase+%283CL-PRO%29&column=ki&startPg=0&Increment=50&submit=Search	154702362
1033951	COc1cccc2[nH]c(cc12)C(=O)N[C@@H](Cc1ccccc1)C(=O)N[C@@H](C[C@@H]1CCNC1=O)C(=O)CO	FTJJLHJSQOEVCN-YYWHXJBOSA-N	WO2005113580-Ex-23::cmdc.202100576, 6e	3C-like proteinase (3CL-PRO)	Human SARS coronavirus		103				http://www.bindingdb.org/jsp/dbsearch/PrimarySearch_ki.jsp?energyterm=kJ/mole&tag=r21&monomerid=423426&enzyme=3C-like+proteinase+%283CL-PRO%29&column=ki&startPg=0&Increment=50&submit=Search	70331170
1033952	COc1cccc2[nH]c(cc12)C(=O)N(C)[C@@H](CC(C)C)C(=O)N[C@@H](C[C@@H]1CCNC1=O)C(=O)CO	QZZQSANQZVXOQZ-QSFXBCCZSA-N	WO2005113580-Ex-29::cmdc.202100576, 6d	3C-like proteinase (3CL-PRO)	Human SARS coronavirus		83				http://www.bindingdb.org/jsp/dbsearch/PrimarySearch_ki.jsp?energyterm=kJ/mole&tag=r21&monomerid=423431&enzyme=3C-like+proteinase+%283CL-PRO%29&column=ki&startPg=0&Increment=50&submit=Search	143139096
1033953	Cc1cc(c(Cl)cc1Cl)S(=O)(=O)c1c(cc(cc1[N+]([O-])=O)C(F)(F)F)[N+]([O-])=O	INAZPZCJNPPHGV-UHFFFAOYSA-N	1,5-dichloro-2-{[2,6-dinitro-4-(trifluoromethyl)benzene]sulfonyl}-4-methylbenzene::Compound 1 analog 3::cmdc.202100576, 7a::med.21724, Compound 147	3C-like proteinase (3CL-PRO)	Human SARS coronavirus		300				http://www.bindingdb.org/jsp/dbsearch/PrimarySearch_ki.jsp?energyterm=kJ/mole&tag=r21&monomerid=11292&enzyme=3C-like+proteinase+%283CL-PRO%29&column=ki&startPg=0&Increment=50&submit=Search	2799606		DB07620	ZINC08626709
1033954	ClC(Cl)=C(Cl)C(=O)Oc1ccc(cc1)S(=O)(=O)c1ccc(OC(=O)C(Cl)=C(Cl)Cl)cc1Cl	DLLSAOIDLYMPGN-UHFFFAOYSA-N	cmdc.202100576, 7b	3C-like proteinase (3CL-PRO)	Human SARS coronavirus		900				http://www.bindingdb.org/jsp/dbsearch/PrimarySearch_ki.jsp?energyterm=kJ/mole&tag=r21&monomerid=496906&enzyme=3C-like+proteinase+%283CL-PRO%29&column=ki&startPg=0&Increment=50&submit=Search	156907363
1033955	FC(F)(F)c1nnc(SC(=O)C2CCC(O2)C#Cc2ccccc2)[nH]1	ZTXLVKBZUHACME-UHFFFAOYSA-N	cmdc.202100576, 7c	3C-like proteinase (3CL-PRO)	Human SARS coronavirus		3000				http://www.bindingdb.org/jsp/dbsearch/PrimarySearch_ki.jsp?energyterm=kJ/mole&tag=r21&monomerid=496907&enzyme=3C-like+proteinase+%283CL-PRO%29&column=ki&startPg=0&Increment=50&submit=Search	156907364
1033956	Cc1noc(NC(=O)c2ccc(s2)-c2cc(nn2C)C(F)(F)F)c1[N+]([O-])=O	BCEDEDBQGPNQMM-UHFFFAOYSA-N	cmdc.202100576, 7d	3C-like proteinase (3CL-PRO)	Human SARS coronavirus		5000				http://www.bindingdb.org/jsp/dbsearch/PrimarySearch_ki.jsp?energyterm=kJ/mole&tag=r21&monomerid=496908&enzyme=3C-like+proteinase+%283CL-PRO%29&column=ki&startPg=0&Increment=50&submit=Search	3776668
1033957	Nc1ncc(c(N)n1)S(=O)(=O)c1ccc(Cl)cc1	RPPFHWBHHCJZJS-UHFFFAOYSA-N	5-[(4-chlorobenzene)sulfonyl]pyrimidine-2,4-diamine::Compound 1 analog 5::cmdc.202100576, 7e	3C-like proteinase (3CL-PRO)	Human SARS coronavirus		6000				http://www.bindingdb.org/jsp/dbsearch/PrimarySearch_ki.jsp?energyterm=kJ/mole&tag=r21&monomerid=11294&enzyme=3C-like+proteinase+%283CL-PRO%29&column=ki&startPg=0&Increment=50&submit=Search	2819040			ZINC00165976
1033958	Cc1oc(cc1-c1cc(NS(=O)(=O)c2cccs2)[nH]n1)C(C)(C)C	HUNAFKUGDBHPEN-UHFFFAOYSA-N	Compound 2 analog 17::N-[3-(5-tert-butyl-2-methylfuran-3-yl)-1H-pyrazol-5-yl]thiophene-2-sulfonamide::cmdc.202100576, 7f	3C-like proteinase (3CL-PRO)	Human SARS coronavirus		10000				http://www.bindingdb.org/jsp/dbsearch/PrimarySearch_ki.jsp?energyterm=kJ/mole&tag=r21&monomerid=11306&enzyme=3C-like+proteinase+%283CL-PRO%29&column=ki&startPg=0&Increment=50&submit=Search	2742278			ZINC01046803
1033959	CCOC(=O)\C=C\[C@H](C[C@@H]1CCNC1=O)NC(=O)[C@H](CC(C)C)NC(=O)[C@@H](NC(=O)[C@H](C)NC(=O)c1cc(C)on1)C(C)C	LIVSSCDUYUOZEL-GLXPMXKMSA-N	cmdc.202100576, 8b(N1)	3C-like proteinase (3CL-PRO)	Human SARS coronavirus		10700				http://www.bindingdb.org/jsp/dbsearch/PrimarySearch_ki.jsp?energyterm=kJ/mole&tag=r21&monomerid=496911&enzyme=3C-like+proteinase+%283CL-PRO%29&column=ki&startPg=0&Increment=50&submit=Search	15959287
1033960	CC(C)C[C@H](NC(=O)[C@@H](NC(=O)[C@H](C)NC(=O)c1cc(C)on1)C(C)C)C(=O)N[C@@H](C[C@@H]1CCNC1=O)\C=C\C(=O)OCc1ccccc1	IDBWWEGDLCFCTD-VNEMRZQUSA-N	cmdc.202100576, 8d(N3)::the N3 Compound	3C-like proteinase (3CL-PRO)	Human SARS coronavirus		9000				http://www.bindingdb.org/jsp/dbsearch/PrimarySearch_ki.jsp?energyterm=kJ/mole&tag=r21&monomerid=419120&enzyme=3C-like+proteinase+%283CL-PRO%29&column=ki&startPg=0&Increment=50&submit=Search	6323191
1033961	CC(C)C[C@H](NC(=O)c1cc2ccccc2[nH]1)C(=O)N[C@@H](C[C@@H]1CCNC1=O)C=O	HXJZYYCILNIXEI-BQFCYCMXSA-N	WO2006061714, P38.8::WO2006061714-ID-10::cmdc.202100576, 10b	3C-like proteinase (3CL-PRO)	Human SARS coronavirus		20				http://www.bindingdb.org/jsp/dbsearch/PrimarySearch_ki.jsp?energyterm=kJ/mole&tag=r21&monomerid=423465&enzyme=3C-like+proteinase+%283CL-PRO%29&column=ki&startPg=0&Increment=50&submit=Search	143239739
1033962	CC(C)C[C@H](NC(=O)c1nc2ccccc2[nH]1)C(=O)N[C@@H](C[C@@H]1CCNC1=O)C=O	CQAHVFTUINWYCR-ZQIUZPCESA-N	WO2006061714, P38.7::WO2006061714-ID-09::cmdc.202100576, 10c	3C-like proteinase (3CL-PRO)	Human SARS coronavirus		30				http://www.bindingdb.org/jsp/dbsearch/PrimarySearch_ki.jsp?energyterm=kJ/mole&tag=r21&monomerid=423464&enzyme=3C-like+proteinase+%283CL-PRO%29&column=ki&startPg=0&Increment=50&submit=Search	11553393
1033963	CC(C)C[C@H](NC(=O)[C@@H](NC(=O)OCc1ccccc1)C(C)C)C(=O)N[C@@H](C[C@@H]1CCNC1=O)C=O	RUHYGYHBVKWREW-CMOCDZPBSA-N	WO2006061714, P39.1::WO2006061714-ID-11::cmdc.202100576, 10d	3C-like proteinase (3CL-PRO)	Human SARS coronavirus		60				http://www.bindingdb.org/jsp/dbsearch/PrimarySearch_ki.jsp?energyterm=kJ/mole&tag=r21&monomerid=423466&enzyme=3C-like+proteinase+%283CL-PRO%29&column=ki&startPg=0&Increment=50&submit=Search	154699455
1033965	COc1cccc2[nH]c(cc12)C(=O)N[C@@H](CC(C)C)C(=O)N[C@@H](CCC(=O)N(C)C)C=O	SEEIOOYGXIFSRU-YJBOKZPZSA-N	WO2006061714, P39.4::WO2006061714-ID-14::cmdc.202100576, 10e	3C-like proteinase (3CL-PRO)	Human SARS coronavirus		50				http://www.bindingdb.org/jsp/dbsearch/PrimarySearch_ki.jsp?energyterm=kJ/mole&tag=r21&monomerid=423469&enzyme=3C-like+proteinase+%283CL-PRO%29&column=ki&startPg=0&Increment=50&submit=Search	91001503
1033966	COc1cccc2[nH]c(cc12)C(=O)N[C@@H](CC(C)C)C(=O)N[C@@H](C[C@@H]1CCNC1=O)C(C)=O		WO2006061714, P38.5::cmdc.202100576, 10f	3C-like proteinase (3CL-PRO)	Human SARS coronavirus		2300				http://www.bindingdb.org/jsp/dbsearch/PrimarySearch_ki.jsp?energyterm=kJ/mole&tag=r21&monomerid=442803&enzyme=3C-like+proteinase+%283CL-PRO%29&column=ki&startPg=0&Increment=50&submit=Search	91341701
1033967	C[C@H]1O[C@@H](Oc2c(oc3cc(O)cc(O)c3c2=O)-c2ccc(O)c(O)c2)[C@H](O)[C@@H](O)[C@H]1O	OXGUCUVFOIWWQJ-JZGUBBPASA-N	cmdc.202100576, 12b::jm5b01461, Compound 85	3C-like proteinase (3CL-PRO)	Human SARS coronavirus		24140				http://www.bindingdb.org/jsp/dbsearch/PrimarySearch_ki.jsp?energyterm=kJ/mole&tag=r21&monomerid=429267&enzyme=3C-like+proteinase+%283CL-PRO%29&column=ki&startPg=0&Increment=50&submit=Search	51402819
1033968	O[C@H]1CO[C@@H](OC[C@H]2O[C@@H](Oc3c(oc4cc(O)cc(O)c4c3=O)-c3ccc(O)c(O)c3)[C@H](O)[C@@H](O)[C@@H]2O)[C@H](O)[C@H]1O	YNMFDPCLPIMRFD-KSPKLRDJSA-N	Quercetin-3-O-arabinoglucoside::cmdc.202100576, 12c	3C-like proteinase (3CL-PRO)	Human SARS coronavirus		31620				http://www.bindingdb.org/jsp/dbsearch/PrimarySearch_ki.jsp?energyterm=kJ/mole&tag=r21&monomerid=496919&enzyme=3C-like+proteinase+%283CL-PRO%29&column=ki&startPg=0&Increment=50&submit=Search	5484066
1033969	OC[C@H]1OC(Oc2c(oc3cc(O)cc(O)c3c2=O)-c2ccc(O)c(O)c2)[C@H](O)[C@H](O)[C@H]1O	OVSQVDMCBVZWGM-MVBIBXSTSA-N	cmdc.202100576, 12d::quercetin-3-O-d-glucopyranoside	3C-like proteinase (3CL-PRO)	Human SARS coronavirus		49730				http://www.bindingdb.org/jsp/dbsearch/PrimarySearch_ki.jsp?energyterm=kJ/mole&tag=r21&monomerid=496920&enzyme=3C-like+proteinase+%283CL-PRO%29&column=ki&startPg=0&Increment=50&submit=Search	12304324
1033970	OC[C@H]1O[C@@H](Oc2c(oc3cc(O)cc(O)c3c2=O)-c2ccc(O)c(O)c2)[C@H](O)[C@@H](O)[C@H]1O	OVSQVDMCBVZWGM-DTGCRPNFSA-N	cmdc.202100576, 12e::jm5b01461, Compound 84	3C-like proteinase (3CL-PRO)	Human SARS coronavirus		50500				http://www.bindingdb.org/jsp/dbsearch/PrimarySearch_ki.jsp?energyterm=kJ/mole&tag=r21&monomerid=429266&enzyme=3C-like+proteinase+%283CL-PRO%29&column=ki&startPg=0&Increment=50&submit=Search	5281643
1033971	CC1CCN(CC1)C(=O)c1ccc2N(Cc3ccc4ccccc4c3)C(=O)C(=O)c2c1	TWRMSEQXGVXEPF-UHFFFAOYSA-N	cmdc.202100576, 13b	3C-like proteinase (3CL-PRO)	Human SARS coronavirus		19730				http://www.bindingdb.org/jsp/dbsearch/PrimarySearch_ki.jsp?energyterm=kJ/mole&tag=r21&monomerid=496922&enzyme=3C-like+proteinase+%283CL-PRO%29&column=ki&startPg=0&Increment=50&submit=Search	72205360
1033972	O=C(N1CCCC1)c1ccc2N(Cc3ccccc3)C(=O)C(=O)c2c1	VCOSFOBPDCQTQJ-UHFFFAOYSA-N	cmdc.202100576, 13c	3C-like proteinase (3CL-PRO)	Human SARS coronavirus		22930				http://www.bindingdb.org/jsp/dbsearch/PrimarySearch_ki.jsp?energyterm=kJ/mole&tag=r21&monomerid=496923&enzyme=3C-like+proteinase+%283CL-PRO%29&column=ki&startPg=0&Increment=50&submit=Search	72205357
1033973	CN1C(=O)C(=O)c2cc(ccc12)C(=O)N1CCOCC1	OTKOUGYSPDRVGM-UHFFFAOYSA-N	cmdc.202100576, 13d	3C-like proteinase (3CL-PRO)	Human SARS coronavirus		36420				http://www.bindingdb.org/jsp/dbsearch/PrimarySearch_ki.jsp?energyterm=kJ/mole&tag=r21&monomerid=496924&enzyme=3C-like+proteinase+%283CL-PRO%29&column=ki&startPg=0&Increment=50&submit=Search	72205170
1033974	O=C(N1CCCC1)c1ccc2N(Cc3ccc4ccccc4c3)C(=O)C(=O)c2c1	AQPUFGMSNYJYSO-UHFFFAOYSA-N	cmdc.202100576, 13e	3C-like proteinase (3CL-PRO)	Human SARS coronavirus		70350				http://www.bindingdb.org/jsp/dbsearch/PrimarySearch_ki.jsp?energyterm=kJ/mole&tag=r21&monomerid=496925&enzyme=3C-like+proteinase+%283CL-PRO%29&column=ki&startPg=0&Increment=50&submit=Search	72205358
1033975	O=C(N1CCCCC1)c1ccc2N(Cc3ccc4ccccc4c3)C(=O)C(=O)c2c1	MHPINVAGCPVXQN-UHFFFAOYSA-N	cmdc.202100576, 13f	3C-like proteinase (3CL-PRO)	Human SARS coronavirus		87760				http://www.bindingdb.org/jsp/dbsearch/PrimarySearch_ki.jsp?energyterm=kJ/mole&tag=r21&monomerid=496926&enzyme=3C-like+proteinase+%283CL-PRO%29&column=ki&startPg=0&Increment=50&submit=Search	72205359
1033976	CC(C)C[C@@H](NC(=O)OCc1ccccc1)C(=O)N[C@H](CC1CCNC1=O)C=O	QYENXTYKACLCGO-UKKPGEIXSA-N	GC373::cmdc.202100576, 14b	3C-like proteinase (3CL-PRO)	Human SARS coronavirus		3500				http://www.bindingdb.org/jsp/dbsearch/PrimarySearch_ki.jsp?energyterm=kJ/mole&tag=r21&monomerid=496927&enzyme=3C-like+proteinase+%283CL-PRO%29&column=ki&startPg=0&Increment=50&submit=Search	156907365
1033978	CC(C)C[C@@H](NC(=O)OCc1ccccc1)C(=O)N[C@H](CC1CCNC1=O)C(O)S([O-])(=O)=O	BSPZFJDYQHDZNR-MUZJZNNISA-M	GC376::cmdc.202100576, 14c	3C-like proteinase (3CL-PRO)	Human SARS coronavirus		4400				http://www.bindingdb.org/jsp/dbsearch/PrimarySearch_ki.jsp?energyterm=kJ/mole&tag=r21&monomerid=496928&enzyme=3C-like+proteinase+%283CL-PRO%29&column=ki&startPg=0&Increment=50&submit=Search	154584300
1033980	CC(C)C[C@@H](NC(=O)OCc1ccccc1)C(=O)N[C@H](CC1CCNC1=O)C(=O)C(=O)NC(C)C	WEDBUGQXVOOKOK-FXJNCMGBSA-N	GC375::cmdc.202100576, 14d	3C-like proteinase (3CL-PRO)	Human SARS coronavirus		4700				http://www.bindingdb.org/jsp/dbsearch/PrimarySearch_ki.jsp?energyterm=kJ/mole&tag=r21&monomerid=496929&enzyme=3C-like+proteinase+%283CL-PRO%29&column=ki&startPg=0&Increment=50&submit=Search	156907366
1033981	CC(C)C[C@@H](NC(=O)[C@H](Cc1cccc2ccccc12)NC(=O)OCc1ccccc1)C(=O)N[C@H](CC1CCNC1=O)C=O	UULYLRNRQOWCOR-CDXQMSQQSA-N	cmdc.202100576, 14e	3C-like proteinase (3CL-PRO)	Human SARS coronavirus		230				http://www.bindingdb.org/jsp/dbsearch/PrimarySearch_ki.jsp?energyterm=kJ/mole&tag=r21&monomerid=496930&enzyme=3C-like+proteinase+%283CL-PRO%29&column=ki&startPg=0&Increment=50&submit=Search	156907367
1033982	CC(C)C[C@@H](NC(=O)[C@H](Cc1cccc2ccccc12)NC(=O)OCc1ccccc1)C(=O)N[C@H](CC1CCNC1=O)C(=O)C(=O)NC(C)C	GCYUVLWAEVVUEN-NOVRBWCNSA-N	cmdc.202100576, 14f	3C-like proteinase (3CL-PRO)	Human SARS coronavirus		810				http://www.bindingdb.org/jsp/dbsearch/PrimarySearch_ki.jsp?energyterm=kJ/mole&tag=r21&monomerid=496931&enzyme=3C-like+proteinase+%283CL-PRO%29&column=ki&startPg=0&Increment=50&submit=Search	156907368
1033983	OC1C(Oc2cc(O)cc(O)c2C1=O)c1ccc(O)c(O)c1	CXQWRCVTCMQVQX-UHFFFAOYSA-N	cmdc.202100576, 15	3C-like proteinase (3CL-PRO)	Human SARS coronavirus		73000				http://www.bindingdb.org/jsp/dbsearch/PrimarySearch_ki.jsp?energyterm=kJ/mole&tag=r21&monomerid=496932&enzyme=3C-like+proteinase+%283CL-PRO%29&column=ki&startPg=0&Increment=50&submit=Search	471
1033984	CC(C)C[C@@H]1[C@@H](CC(=O)OCc2ccccc2)Cc2cn(CCCNC(=O)CC[C@H](NC1=O)C=O)nn2	IXXLXNJLKKRERL-AOHZBQACSA-N	cmdc.202100576, 16c	3C-like proteinase (3CL-PRO)	Human SARS coronavirus		15500				http://www.bindingdb.org/jsp/dbsearch/PrimarySearch_ki.jsp?energyterm=kJ/mole&tag=r21&monomerid=496933&enzyme=3C-like+proteinase+%283CL-PRO%29&column=ki&startPg=0&Increment=50&submit=Search	156907369
1033985	Cc1ccc(SSc2nccs2)cc1	KDIUNDCTDYBFOQ-UHFFFAOYSA-N	cmdc.202100576, 17b	3C-like proteinase (3CL-PRO)	Human SARS coronavirus		1300				http://www.bindingdb.org/jsp/dbsearch/PrimarySearch_ki.jsp?energyterm=kJ/mole&tag=r21&monomerid=496934&enzyme=3C-like+proteinase+%283CL-PRO%29&column=ki&startPg=0&Increment=50&submit=Search	145963636
1033986	CC(=O)Nc1cnc(SSc2ccccc2[N+]([O-])=O)s1	QKGACAFLJPRKDT-UHFFFAOYSA-N	cmdc.202100576, 17c	3C-like proteinase (3CL-PRO)	Human SARS coronavirus		1900				http://www.bindingdb.org/jsp/dbsearch/PrimarySearch_ki.jsp?energyterm=kJ/mole&tag=r21&monomerid=496935&enzyme=3C-like+proteinase+%283CL-PRO%29&column=ki&startPg=0&Increment=50&submit=Search	145963050
1033987	[O-][N+](=O)c1ccccc1SSc1nccs1	MLEKSUHNSMICGV-UHFFFAOYSA-N	cmdc.202100576, 17d	3C-like proteinase (3CL-PRO)	Human SARS coronavirus		2000				http://www.bindingdb.org/jsp/dbsearch/PrimarySearch_ki.jsp?energyterm=kJ/mole&tag=r21&monomerid=496936&enzyme=3C-like+proteinase+%283CL-PRO%29&column=ki&startPg=0&Increment=50&submit=Search	145960518
1033988	COC(=O)c1c[nH]c(SSc2ccccc2[N+]([O-])=O)n1	WMOJIMMCJASXOL-UHFFFAOYSA-N	cmdc.202100576, 17e	3C-like proteinase (3CL-PRO)	Human SARS coronavirus		2000				http://www.bindingdb.org/jsp/dbsearch/PrimarySearch_ki.jsp?energyterm=kJ/mole&tag=r21&monomerid=496937&enzyme=3C-like+proteinase+%283CL-PRO%29&column=ki&startPg=0&Increment=50&submit=Search	156907370
1033989	Fc1ccc(SSc2nccs2)cc1	FUPPAQPKOVVHEO-UHFFFAOYSA-N	cmdc.202100576, 17f	3C-like proteinase (3CL-PRO)	Human SARS coronavirus		2200				http://www.bindingdb.org/jsp/dbsearch/PrimarySearch_ki.jsp?energyterm=kJ/mole&tag=r21&monomerid=496938&enzyme=3C-like+proteinase+%283CL-PRO%29&column=ki&startPg=0&Increment=50&submit=Search	145961686
1033990	O=C[C@H](CC1CCNC1=O)NC(=O)[C@H](Cc1ccccc1)NC(=O)c1cc2ccccc2[nH]1	BRFDPJYHCJVJEP-ZDZADGERSA-N	cmdc.202100576, 18b	3C-like proteinase (3CL-PRO)	Human SARS coronavirus		30				http://www.bindingdb.org/jsp/dbsearch/PrimarySearch_ki.jsp?energyterm=kJ/mole&tag=r21&monomerid=496939&enzyme=3C-like+proteinase+%283CL-PRO%29&column=ki&startPg=0&Increment=50&submit=Search	156907371
1033992	CC(C)[C@H](NC(=O)c1cncc(F)c1)C(=O)N[C@@H](Cc1ccccc1)C(=C)N[C@@H](CC1CCNC1=O)C=O	MQDKRIUXDYNTPN-FQNOENOBSA-N	cmdc.202100576, 18c	3C-like proteinase (3CL-PRO)	Human SARS coronavirus		35				http://www.bindingdb.org/jsp/dbsearch/PrimarySearch_ki.jsp?energyterm=kJ/mole&tag=r21&monomerid=496940&enzyme=3C-like+proteinase+%283CL-PRO%29&column=ki&startPg=0&Increment=50&submit=Search	156907372
1033993	CC(C)[C@H](NC(=O)c1cc2ccccc2[nH]1)C(=O)N[C@@H](Cc1ccccc1)C(=O)N[C@@H](CC1CCNC1=O)C=O	AQHVHFFDFXWGMJ-NCQVOMRTSA-N	cmdc.202100576, 18d	3C-like proteinase (3CL-PRO)	Human SARS coronavirus		50				http://www.bindingdb.org/jsp/dbsearch/PrimarySearch_ki.jsp?energyterm=kJ/mole&tag=r21&monomerid=496941&enzyme=3C-like+proteinase+%283CL-PRO%29&column=ki&startPg=0&Increment=50&submit=Search	156907373
1033995	O=C[C@H](CC1CCNC1=O)NC(=O)[C@H](Cc1ccccc1)NC(=O)c1ccc2OCOc2c1	SIAOKSJKWWLBHX-MNNMKWMVSA-N	cmdc.202100576, 18e	3C-like proteinase (3CL-PRO)	Human SARS coronavirus		100				http://www.bindingdb.org/jsp/dbsearch/PrimarySearch_ki.jsp?energyterm=kJ/mole&tag=r21&monomerid=496942&enzyme=3C-like+proteinase+%283CL-PRO%29&column=ki&startPg=0&Increment=50&submit=Search	156907374
1033997	Fc1ccc2[nH]c(cc2c1)C(=O)N[C@@H](Cc1ccccc1)C(=O)N[C@@H](CC1CCNC1=O)C=O	WWAZVLVSGQAIIE-BPWGJPQNSA-N	cmdc.202100576, 18f	3C-like proteinase (3CL-PRO)	Human SARS coronavirus		111				http://www.bindingdb.org/jsp/dbsearch/PrimarySearch_ki.jsp?energyterm=kJ/mole&tag=r21&monomerid=496943&enzyme=3C-like+proteinase+%283CL-PRO%29&column=ki&startPg=0&Increment=50&submit=Search	156907375
1033998	CC(C)C(=O)Nc1ccc(cc1)N([C@H](C(=O)NCc1ccccc1)c1ccc(Cl)c(F)c1)C(=O)Cn1nnc2ccccc12	ISHXMYLDUPUTFN-HKBQPEDESA-N	cmdc.202100576, 19b	3C-like proteinase (3CL-PRO)	Human SARS coronavirus		800				http://www.bindingdb.org/jsp/dbsearch/PrimarySearch_ki.jsp?energyterm=kJ/mole&tag=r21&monomerid=496944&enzyme=3C-like+proteinase+%283CL-PRO%29&column=ki&startPg=0&Increment=50&submit=Search	156907376
1033999	CC(C)C(=O)Nc1ccc(cc1)N([C@H](C(=O)NCc1ccccc1)c1ccc(O)cc1)C(=O)Cn1nnc2ccccc12	JXLFQIWEKYHIAM-HKBQPEDESA-N	cmdc.202100576, 19c	3C-like proteinase (3CL-PRO)	Human SARS coronavirus		1100				http://www.bindingdb.org/jsp/dbsearch/PrimarySearch_ki.jsp?energyterm=kJ/mole&tag=r21&monomerid=496945&enzyme=3C-like+proteinase+%283CL-PRO%29&column=ki&startPg=0&Increment=50&submit=Search	156907377
1034000	CC(C)C(=O)Nc1ccc(cc1)N([C@H](C(=O)NCc1ccccc1)c1cccc(F)c1)C(=O)Cn1nnc2ccccc12	PGBBZORGQALHAL-HKBQPEDESA-N	cmdc.202100576, 19d	3C-like proteinase (3CL-PRO)	Human SARS coronavirus		1600				http://www.bindingdb.org/jsp/dbsearch/PrimarySearch_ki.jsp?energyterm=kJ/mole&tag=r21&monomerid=496946&enzyme=3C-like+proteinase+%283CL-PRO%29&column=ki&startPg=0&Increment=50&submit=Search	156907378
1034001	CC(C)(C)c1ccc(cc1)N([C@H](C(=O)NC1CCCC1)c1cccnc1)C(=O)c1c[nH]cn1	GYSUWMLOWVCSQJ-QHCPKHFHSA-N	cmdc.202100576, 19e	3C-like proteinase (3CL-PRO)	Human SARS coronavirus		1700				http://www.bindingdb.org/jsp/dbsearch/PrimarySearch_ki.jsp?energyterm=kJ/mole&tag=r21&monomerid=496947&enzyme=3C-like+proteinase+%283CL-PRO%29&column=ki&startPg=0&Increment=50&submit=Search	156907379
1034002	O=C(Cn1nnc2ccccc12)N([C@H](C(=O)NCc1ccccc1)c1ccsc1)c1ccc(NC(=O)C2CC2)cc1	MOOGDCUJJKYCSA-LJAQVGFWSA-N	cmdc.202100576, 19f	3C-like proteinase (3CL-PRO)	Human SARS coronavirus		2000				http://www.bindingdb.org/jsp/dbsearch/PrimarySearch_ki.jsp?energyterm=kJ/mole&tag=r21&monomerid=496948&enzyme=3C-like+proteinase+%283CL-PRO%29&column=ki&startPg=0&Increment=50&submit=Search	156907380
1034008	CC(C)(C)NC(=O)C(=O)[C@H](C[C@@H]1CCNC1=O)NC(=O)[C@H](CC1CCCCC1)NC(=O)[C@H](Cc1cccc2ccccc12)NC(=O)OCc1ccc(OCN2CCOCC2)cc1	LXNRODUTLYKGBV-IRJSLHMBSA-N	cmdc.202100576, 22b	3C-like proteinase (3CL-PRO)	Human SARS coronavirus		6.60				http://www.bindingdb.org/jsp/dbsearch/PrimarySearch_ki.jsp?energyterm=kJ/mole&tag=r21&monomerid=496954&enzyme=3C-like+proteinase+%283CL-PRO%29&column=ki&startPg=0&Increment=50&submit=Search	156907382
1034009	COC(C)[C@H](NC(=O)OCc1ccccc1)C(=O)N[C@@H](CC(C)C)C(=O)N[C@@H](C[C@@H]1CCNC1=O)C(=O)C(=O)NC(C)C	LYNTYGQCINXZAN-RLHFQTHOSA-N	cmdc.202100576, 22c	3C-like proteinase (3CL-PRO)	Human SARS coronavirus		6.80				http://www.bindingdb.org/jsp/dbsearch/PrimarySearch_ki.jsp?energyterm=kJ/mole&tag=r21&monomerid=496955&enzyme=3C-like+proteinase+%283CL-PRO%29&column=ki&startPg=0&Increment=50&submit=Search	156907383
1034010	CC(C)C[C@H](NC(=O)[C@H](CN(C)C)NC(=O)OCc1ccccc1)C(=O)N[C@@H](C[C@@H]1CCNC1=O)C(=O)C(=O)NC(C)(C)C	RBXUCWGAXPCWJY-ZJZGAYNASA-N	cmdc.202100576, 22d	3C-like proteinase (3CL-PRO)	Human SARS coronavirus		7.00				http://www.bindingdb.org/jsp/dbsearch/PrimarySearch_ki.jsp?energyterm=kJ/mole&tag=r21&monomerid=496956&enzyme=3C-like+proteinase+%283CL-PRO%29&column=ki&startPg=0&Increment=50&submit=Search	134313938
1034011	CC(C)C[C@H](NC(=O)[C@H](CN1CCOCC1)NC(=O)OCc1ccccc1)C(=O)N[C@@H](C[C@@H]1CCNC1=O)C(=O)C(=O)NC(C)C	QPWPPKQBNBGAKA-CQJMVLFOSA-N	cmdc.202100576, 22e	3C-like proteinase (3CL-PRO)	Human SARS coronavirus		7.00				http://www.bindingdb.org/jsp/dbsearch/PrimarySearch_ki.jsp?energyterm=kJ/mole&tag=r21&monomerid=496957&enzyme=3C-like+proteinase+%283CL-PRO%29&column=ki&startPg=0&Increment=50&submit=Search	134313939
1034012	CC(C)C[C@H](NC(=O)[C@H](CN1CCC(F)CC1)NC(=O)OCc1ccccc1)C(=O)N[C@@H](C[C@@H]1CCNC1=O)C(=O)C(=O)NC(C)C	HLWOHQINQVCEIR-MNUOIFNESA-N	cmdc.202100576, 22f	3C-like proteinase (3CL-PRO)	Human SARS coronavirus		7.00				http://www.bindingdb.org/jsp/dbsearch/PrimarySearch_ki.jsp?energyterm=kJ/mole&tag=r21&monomerid=496958&enzyme=3C-like+proteinase+%283CL-PRO%29&column=ki&startPg=0&Increment=50&submit=Search	134306141
1034018	CC(C)(C)C[C@H](NC(=O)c1cc2ccccc2[nH]1)C(=O)N[C@@H](C[C@@H]1CCNC1=O)C(=O)CO	ZWIJIAMEZDPIBS-IEZWGBDMSA-N	WO2005113580-Ex-16::cmdc.202100576, 24b	3C-like proteinase (3CL-PRO)	Human SARS coronavirus		20				http://www.bindingdb.org/jsp/dbsearch/PrimarySearch_ki.jsp?energyterm=kJ/mole&tag=r21&monomerid=423420&enzyme=3C-like+proteinase+%283CL-PRO%29&column=ki&startPg=0&Increment=50&submit=Search	90737702
1034019	CCCC[C@H](NC(=O)c1cc2c(OC)cccc2[nH]1)C(=O)N[C@@H](C[C@@H]1CCNC1=O)C(=O)CO	VBDNWOQWUMJPAC-WBAXXEDZSA-N	WO2005113580-Ex-08::cmdc.202100576, 24c	3C-like proteinase (3CL-PRO)	Human SARS coronavirus		20				http://www.bindingdb.org/jsp/dbsearch/PrimarySearch_ki.jsp?energyterm=kJ/mole&tag=r21&monomerid=423414&enzyme=3C-like+proteinase+%283CL-PRO%29&column=ki&startPg=0&Increment=50&submit=Search	154702364
1034020	COc1cccc2[nH]c(cc12)C(=O)N[C@@H](Cc1ccccc1)C(=O)N[C@@H](C[C@@H]1CCNC1=O)C(=O)CO	FTJJLHJSQOEVCN-YYWHXJBOSA-N	WO2005113580-Ex-23::cmdc.202100576, 6e	3C-like proteinase (3CL-PRO)	Human SARS coronavirus		103				http://www.bindingdb.org/jsp/dbsearch/PrimarySearch_ki.jsp?energyterm=kJ/mole&tag=r21&monomerid=423426&enzyme=3C-like+proteinase+%283CL-PRO%29&column=ki&startPg=0&Increment=50&submit=Search	70331170
1034021	COc1cccc2[nH]c(cc12)C(=O)N[C@@H](CC(C)C)C(=O)N[C@@H](C[C@@H]1CCNC1=O)C(=O)COC(=O)C1CC1	NJDKHIRBWKLHES-YYWHXJBOSA-N	WO2005113580-Ex-37::cmdc.202100576, 24e	3C-like proteinase (3CL-PRO)	Human SARS coronavirus		162				http://www.bindingdb.org/jsp/dbsearch/PrimarySearch_ki.jsp?energyterm=kJ/mole&tag=r21&monomerid=423435&enzyme=3C-like+proteinase+%283CL-PRO%29&column=ki&startPg=0&Increment=50&submit=Search	143139062
50151719	OC(=O)C(=O)CC(=O)c1ccc(OCc2ccccc2)cc1	KMRYXNIEUDTYAJ-UHFFFAOYSA-N	4-(4-(benzyloxy)phenyl)-2-hydroxy-4-oxobut-2-enoic acid::CHEMBL492768	3C-like proteinase (3CL-PRO)	Human SARS coronavirus		39900			10.1016/j.bmcl.2009.02.010	http://www.bindingdb.org/jsp/dbsearch/PrimarySearch_ki.jsp?energyterm=kJ/mole&tag=r21&monomerid=50258085&enzyme=3C-like+proteinase+%283CL-PRO%29&column=ki&startPg=0&Increment=50&submit=Search	23090268	CHEMBL492768		ZINC40949462
50151720	OC(=O)C(=O)CC(=O)c1cccc(NCc2ccc(Cl)cc2)c1	LXCYOKXQXCRNRS-UHFFFAOYSA-N	4-(3-(4-chlorobenzylamino)phenyl)-2-hydroxy-4-oxobut-2-enoic acid::CHEMBL522710	3C-like proteinase (3CL-PRO)	Human SARS coronavirus		>50000			10.1016/j.bmcl.2009.02.010	http://www.bindingdb.org/jsp/dbsearch/PrimarySearch_ki.jsp?energyterm=kJ/mole&tag=r21&monomerid=50258183&enzyme=3C-like+proteinase+%283CL-PRO%29&column=ki&startPg=0&Increment=50&submit=Search	91935363	CHEMBL522710		ZINC40955733
50151721	OC(=O)C(=O)CC(=O)c1cccc(NCc2ccccc2)c1	SPMMLCCLNJGITG-UHFFFAOYSA-N	4-(3-Benzylamino-phenyl)-2,4-dioxo-butyric acid::CHEMBL367740::CHEMBL371719::CHEMBL492571	3C-like proteinase (3CL-PRO)	Human SARS coronavirus		>50000			10.1016/j.bmcl.2009.02.010	http://www.bindingdb.org/jsp/dbsearch/PrimarySearch_ki.jsp?energyterm=kJ/mole&tag=r21&monomerid=50137863&enzyme=3C-like+proteinase+%283CL-PRO%29&column=ki&startPg=0&Increment=50&submit=Search	510665	CHEMBL492571CHEMBL371719CHEMBL367740		ZINC13531973
50151722	OC(=O)C(=O)CC(=O)c1ccc(OCc2ccc(Cl)cc2)cc1	VNFJWPKQPJOPAE-UHFFFAOYSA-N	4-(4-(4-chlorobenzyloxy)phenyl)-2-hydroxy-4-oxobut-2-enoic acid::CHEMBL492769	3C-like proteinase (3CL-PRO)	Human SARS coronavirus		>50000			10.1016/j.bmcl.2009.02.010	http://www.bindingdb.org/jsp/dbsearch/PrimarySearch_ki.jsp?energyterm=kJ/mole&tag=r21&monomerid=50258132&enzyme=3C-like+proteinase+%283CL-PRO%29&column=ki&startPg=0&Increment=50&submit=Search	91935360	CHEMBL492769		ZINC40949754
50151723	OC(=O)C(=O)CC(=O)c1ccccc1OCc1ccc(Cl)cc1	FPKWTTGUQSRLMF-UHFFFAOYSA-N	4-(2-(4-chlorobenzyloxy)phenyl)-2-hydroxy-4-oxobut-2-enoic acid::CHEMBL492772	3C-like proteinase (3CL-PRO)	Human SARS coronavirus		>50000			10.1016/j.bmcl.2009.02.010	http://www.bindingdb.org/jsp/dbsearch/PrimarySearch_ki.jsp?energyterm=kJ/mole&tag=r21&monomerid=50258136&enzyme=3C-like+proteinase+%283CL-PRO%29&column=ki&startPg=0&Increment=50&submit=Search	91935362	CHEMBL492772		ZINC40949758
50151724	OC(=O)C(=O)CC(=O)c1cccc(OCc2ccccc2)c1	FCBLTJFBERTVBY-UHFFFAOYSA-N	(Z)-4-(3-Benzyloxy-phenyl)-2-hydroxy-4-oxo-but-2-enoic acid::4-(3-Benzyloxy-phenyl)-2-hydroxy-4-oxo-but-2-enoic acid::CHEMBL108253::CHEMBL18927::CHEMBL492770	3C-like proteinase (3CL-PRO)	Human SARS coronavirus		>50000			10.1016/j.bmcl.2009.02.010	http://www.bindingdb.org/jsp/dbsearch/PrimarySearch_ki.jsp?energyterm=kJ/mole&tag=r21&monomerid=50115572&enzyme=3C-like+proteinase+%283CL-PRO%29&column=ki&startPg=0&Increment=50&submit=Search	493415	CHEMBL108253CHEMBL492770CHEMBL18927		ZINC13488694
50151725	OC(=O)C(=O)CC(=O)c1ccccc1OCc1ccccc1	STKCEKDDIVPHDO-UHFFFAOYSA-N	4-(2-Benzyloxy-phenyl)-2,4-dioxo-butyric acid::4-[2-(benzyloxy)phenyl]-2,4-dioxobutanoic acid::CHEMBL199199::CHEMBL368481::CHEMBL499444	3C-like proteinase (3CL-PRO)	Human SARS coronavirus		>50000			10.1016/j.bmcl.2009.02.010	http://www.bindingdb.org/jsp/dbsearch/PrimarySearch_ki.jsp?energyterm=kJ/mole&tag=r21&monomerid=50137878&enzyme=3C-like+proteinase+%283CL-PRO%29&column=ki&startPg=0&Increment=50&submit=Search	510646	CHEMBL199199CHEMBL499444CHEMBL368481		ZINC13674051
50151726	OC(=O)C(=O)CC(=O)c1cccc(OCc2ccc(Cl)cc2)c1	KDAOPAWDLZGMGF-UHFFFAOYSA-N	4-(3-(4-chlorobenzyloxy)phenyl)-2-hydroxy-4-oxobut-2-enoic acid::CHEMBL492771	3C-like proteinase (3CL-PRO)	Human SARS coronavirus		13600			10.1016/j.bmcl.2009.02.010	http://www.bindingdb.org/jsp/dbsearch/PrimarySearch_ki.jsp?energyterm=kJ/mole&tag=r21&monomerid=50258134&enzyme=3C-like+proteinase+%283CL-PRO%29&column=ki&startPg=0&Increment=50&submit=Search	91935361	CHEMBL492771		ZINC40949756
50151727	OC(=O)C(=O)CC(=O)c1ccc(OCc2ccccc2)cc1	KMRYXNIEUDTYAJ-UHFFFAOYSA-N	4-(4-(benzyloxy)phenyl)-2-hydroxy-4-oxobut-2-enoic acid::CHEMBL492768	3C-like proteinase (3CL-PRO)	Human SARS coronavirus		41300			10.1016/j.bmcl.2009.02.010	http://www.bindingdb.org/jsp/dbsearch/PrimarySearch_ki.jsp?energyterm=kJ/mole&tag=r21&monomerid=50258085&enzyme=3C-like+proteinase+%283CL-PRO%29&column=ki&startPg=0&Increment=50&submit=Search	23090268	CHEMBL492768		ZINC40949462
50151728	OC(=O)C(=O)CC(=O)c1cccc(OCc2ccc(Cl)cc2)c1	KDAOPAWDLZGMGF-UHFFFAOYSA-N	4-(3-(4-chlorobenzyloxy)phenyl)-2-hydroxy-4-oxobut-2-enoic acid::CHEMBL492771	3C-like proteinase (3CL-PRO)	Human SARS coronavirus		24400			10.1016/j.bmcl.2009.02.010	http://www.bindingdb.org/jsp/dbsearch/PrimarySearch_ki.jsp?energyterm=kJ/mole&tag=r21&monomerid=50258134&enzyme=3C-like+proteinase+%283CL-PRO%29&column=ki&startPg=0&Increment=50&submit=Search	91935361	CHEMBL492771		ZINC40949756
50151729	OC(=O)C(=O)CC(=O)c1ccccc1OCc1ccccc1	STKCEKDDIVPHDO-UHFFFAOYSA-N	4-(2-Benzyloxy-phenyl)-2,4-dioxo-butyric acid::4-[2-(benzyloxy)phenyl]-2,4-dioxobutanoic acid::CHEMBL199199::CHEMBL368481::CHEMBL499444	3C-like proteinase (3CL-PRO)	Human SARS coronavirus		>50000			10.1016/j.bmcl.2009.02.010	http://www.bindingdb.org/jsp/dbsearch/PrimarySearch_ki.jsp?energyterm=kJ/mole&tag=r21&monomerid=50137878&enzyme=3C-like+proteinase+%283CL-PRO%29&column=ki&startPg=0&Increment=50&submit=Search	510646	CHEMBL199199CHEMBL499444CHEMBL368481		ZINC13674051
50151730	OC(=O)C(=O)CC(=O)c1ccccc1OCc1ccc(Cl)cc1	FPKWTTGUQSRLMF-UHFFFAOYSA-N	4-(2-(4-chlorobenzyloxy)phenyl)-2-hydroxy-4-oxobut-2-enoic acid::CHEMBL492772	3C-like proteinase (3CL-PRO)	Human SARS coronavirus		28700			10.1016/j.bmcl.2009.02.010	http://www.bindingdb.org/jsp/dbsearch/PrimarySearch_ki.jsp?energyterm=kJ/mole&tag=r21&monomerid=50258136&enzyme=3C-like+proteinase+%283CL-PRO%29&column=ki&startPg=0&Increment=50&submit=Search	91935362	CHEMBL492772		ZINC40949758
50151731	OC(=O)C(=O)CC(=O)c1cccc(OCc2ccccc2)c1	FCBLTJFBERTVBY-UHFFFAOYSA-N	(Z)-4-(3-Benzyloxy-phenyl)-2-hydroxy-4-oxo-but-2-enoic acid::4-(3-Benzyloxy-phenyl)-2-hydroxy-4-oxo-but-2-enoic acid::CHEMBL108253::CHEMBL18927::CHEMBL492770	3C-like proteinase (3CL-PRO)	Human SARS coronavirus		>50000			10.1016/j.bmcl.2009.02.010	http://www.bindingdb.org/jsp/dbsearch/PrimarySearch_ki.jsp?energyterm=kJ/mole&tag=r21&monomerid=50115572&enzyme=3C-like+proteinase+%283CL-PRO%29&column=ki&startPg=0&Increment=50&submit=Search	493415	CHEMBL108253CHEMBL492770CHEMBL18927		ZINC13488694
50151732	OC(=O)C(=O)CC(=O)c1cccc(NCc2ccccc2)c1	SPMMLCCLNJGITG-UHFFFAOYSA-N	4-(3-Benzylamino-phenyl)-2,4-dioxo-butyric acid::CHEMBL367740::CHEMBL371719::CHEMBL492571	3C-like proteinase (3CL-PRO)	Human SARS coronavirus		5400			10.1016/j.bmcl.2009.02.010	http://www.bindingdb.org/jsp/dbsearch/PrimarySearch_ki.jsp?energyterm=kJ/mole&tag=r21&monomerid=50137863&enzyme=3C-like+proteinase+%283CL-PRO%29&column=ki&startPg=0&Increment=50&submit=Search	510665	CHEMBL492571CHEMBL371719CHEMBL367740		ZINC13531973
50151733	OC(=O)C(=O)CC(=O)c1ccc(OCc2ccc(Cl)cc2)cc1	VNFJWPKQPJOPAE-UHFFFAOYSA-N	4-(4-(4-chlorobenzyloxy)phenyl)-2-hydroxy-4-oxobut-2-enoic acid::CHEMBL492769	3C-like proteinase (3CL-PRO)	Human SARS coronavirus		>50000			10.1016/j.bmcl.2009.02.010	http://www.bindingdb.org/jsp/dbsearch/PrimarySearch_ki.jsp?energyterm=kJ/mole&tag=r21&monomerid=50258132&enzyme=3C-like+proteinase+%283CL-PRO%29&column=ki&startPg=0&Increment=50&submit=Search	91935360	CHEMBL492769		ZINC40949754
50151734	OC(=O)C(=O)CC(=O)c1cccc(NCc2ccc(Cl)cc2)c1	LXCYOKXQXCRNRS-UHFFFAOYSA-N	4-(3-(4-chlorobenzylamino)phenyl)-2-hydroxy-4-oxobut-2-enoic acid::CHEMBL522710	3C-like proteinase (3CL-PRO)	Human SARS coronavirus		11000			10.1016/j.bmcl.2009.02.010	http://www.bindingdb.org/jsp/dbsearch/PrimarySearch_ki.jsp?energyterm=kJ/mole&tag=r21&monomerid=50258183&enzyme=3C-like+proteinase+%283CL-PRO%29&column=ki&startPg=0&Increment=50&submit=Search	91935363	CHEMBL522710		ZINC40955733
50155213	Oc1cc(OCc2cccc(Cl)c2)cc2oc(c(O)c(=O)c12)-c1ccc2OCOc2c1	RLDACGCZSLOROC-UHFFFAOYSA-N	2-Benzo[1,3]dioxol-5-yl-7-(3-chloro-benzyloxy)-3,5-dihydroxy-chromen-4-one::CHEMBL560933	3C-like proteinase (3CL-PRO)	Human SARS coronavirus		>50000			10.1016/j.bmcl.2009.07.009	http://www.bindingdb.org/jsp/dbsearch/PrimarySearch_ki.jsp?energyterm=kJ/mole&tag=r21&monomerid=50297256&enzyme=3C-like+proteinase+%283CL-PRO%29&column=ki&startPg=0&Increment=50&submit=Search	45268452	CHEMBL560933		ZINC43120081
50155214	Oc1cc(OCc2cccc(Cl)c2)cc2oc(c(O)c(=O)c12)-c1ccc2OCOc2c1	RLDACGCZSLOROC-UHFFFAOYSA-N	2-Benzo[1,3]dioxol-5-yl-7-(3-chloro-benzyloxy)-3,5-dihydroxy-chromen-4-one::CHEMBL560933	3C-like proteinase (3CL-PRO)	Human SARS coronavirus		15400			10.1016/j.bmcl.2009.07.009	http://www.bindingdb.org/jsp/dbsearch/PrimarySearch_ki.jsp?energyterm=kJ/mole&tag=r21&monomerid=50297256&enzyme=3C-like+proteinase+%283CL-PRO%29&column=ki&startPg=0&Increment=50&submit=Search	45268452	CHEMBL560933		ZINC43120081
50155215	Oc1ccc(cc1O)-c1oc2cc(OCc3ccc(Cl)cc3)cc(O)c2c(=O)c1O	BYQBMIHQROWCQG-UHFFFAOYSA-N	7-(4-Chloro-benzyloxy)-2-(3,4-dihydroxy-phenyl)-3,5-dihydroxy-chromen-4-one::CHEMBL550256	3C-like proteinase (3CL-PRO)	Human SARS coronavirus		20900			10.1016/j.bmcl.2009.07.009	http://www.bindingdb.org/jsp/dbsearch/PrimarySearch_ki.jsp?energyterm=kJ/mole&tag=r21&monomerid=50297252&enzyme=3C-like+proteinase+%283CL-PRO%29&column=ki&startPg=0&Increment=50&submit=Search	45270979	CHEMBL550256		ZINC43012025
50155216	Oc1ccc(cc1O)-c1oc2cc(OCc3cccc(c3)C#N)cc(O)c2c(=O)c1O	JBMZSOUKPAAEJU-UHFFFAOYSA-N	3-[2-(3,4-Dihydroxy-phenyl)-3,5-dihydroxy-4-oxo-4H-chromen-7-yloxymethyl]-benzonitrile::CHEMBL551131	3C-like proteinase (3CL-PRO)	Human SARS coronavirus		25400			10.1016/j.bmcl.2009.07.009	http://www.bindingdb.org/jsp/dbsearch/PrimarySearch_ki.jsp?energyterm=kJ/mole&tag=r21&monomerid=50297254&enzyme=3C-like+proteinase+%283CL-PRO%29&column=ki&startPg=0&Increment=50&submit=Search	44517748	CHEMBL551131		ZINC43011508
50155217	Oc1ccc(cc1O)-c1oc2cc(OCc3cccc(Cl)c3)cc(O)c2c(=O)c1O	BIVPHUOIFUDUSK-UHFFFAOYSA-N	7-(3-Chloro-benzyloxy)-2-(3,4-dihydroxy-phenyl)-3,5-dihydroxy-chromen-4-one::CHEMBL551130	3C-like proteinase (3CL-PRO)	Human SARS coronavirus		>50000			10.1016/j.bmcl.2009.07.009	http://www.bindingdb.org/jsp/dbsearch/PrimarySearch_ki.jsp?energyterm=kJ/mole&tag=r21&monomerid=50297253&enzyme=3C-like+proteinase+%283CL-PRO%29&column=ki&startPg=0&Increment=50&submit=Search	45271826	CHEMBL551130		ZINC43065223
50155218	Oc1ccc(cc1O)-c1oc2cc(OCc3cccc(c3)C#N)cc(O)c2c(=O)c1O	JBMZSOUKPAAEJU-UHFFFAOYSA-N	3-[2-(3,4-Dihydroxy-phenyl)-3,5-dihydroxy-4-oxo-4H-chromen-7-yloxymethyl]-benzonitrile::CHEMBL551131	3C-like proteinase (3CL-PRO)	Human SARS coronavirus		2700			10.1016/j.bmcl.2009.07.009	http://www.bindingdb.org/jsp/dbsearch/PrimarySearch_ki.jsp?energyterm=kJ/mole&tag=r21&monomerid=50297254&enzyme=3C-like+proteinase+%283CL-PRO%29&column=ki&startPg=0&Increment=50&submit=Search	44517748	CHEMBL551131		ZINC43011508
50155219	Oc1cc(CNCc2cccc(Cl)c2)oc2ccc(O)c(=O)c12	USNNPKLCJHDFEE-UHFFFAOYSA-N	2-[(3-Chloro-benzylamino)-methyl]-5,6-dihydroxy-chromen-4-one::CHEMBL560136	3C-like proteinase (3CL-PRO)	Human SARS coronavirus		>50000			10.1016/j.bmcl.2009.07.009	http://www.bindingdb.org/jsp/dbsearch/PrimarySearch_ki.jsp?energyterm=kJ/mole&tag=r21&monomerid=50297249&enzyme=3C-like+proteinase+%283CL-PRO%29&column=ki&startPg=0&Increment=50&submit=Search	45268445	CHEMBL560136		ZINC43074183
50155220	Oc1cc(CNCc2cccc(Cl)c2)oc2ccc(O)c(=O)c12	USNNPKLCJHDFEE-UHFFFAOYSA-N	2-[(3-Chloro-benzylamino)-methyl]-5,6-dihydroxy-chromen-4-one::CHEMBL560136	3C-like proteinase (3CL-PRO)	Human SARS coronavirus		>50000			10.1016/j.bmcl.2009.07.009	http://www.bindingdb.org/jsp/dbsearch/PrimarySearch_ki.jsp?energyterm=kJ/mole&tag=r21&monomerid=50297249&enzyme=3C-like+proteinase+%283CL-PRO%29&column=ki&startPg=0&Increment=50&submit=Search	45268445	CHEMBL560136		ZINC43074183
50155221	Oc1cc(OCc2cccc(c2)C#N)cc2oc(c(O)c(=O)c12)-c1ccc2OCOc2c1	HUDLJTDCXGYOKM-UHFFFAOYSA-N	3-(2-Benzo[1,3]dioxol-5-yl-3,5-dihydroxy-4-oxo-4H-chromen-7-yloxymethyl)-benzonitrile::CHEMBL551529	3C-like proteinase (3CL-PRO)	Human SARS coronavirus		42900			10.1016/j.bmcl.2009.07.009	http://www.bindingdb.org/jsp/dbsearch/PrimarySearch_ki.jsp?energyterm=kJ/mole&tag=r21&monomerid=50297257&enzyme=3C-like+proteinase+%283CL-PRO%29&column=ki&startPg=0&Increment=50&submit=Search	45271832	CHEMBL551529		ZINC43061244
50155222	Oc1ccc(cc1O)-c1oc2cc(OCc3cccc(Cl)c3)cc(O)c2c(=O)c1O	BIVPHUOIFUDUSK-UHFFFAOYSA-N	7-(3-Chloro-benzyloxy)-2-(3,4-dihydroxy-phenyl)-3,5-dihydroxy-chromen-4-one::CHEMBL551130	3C-like proteinase (3CL-PRO)	Human SARS coronavirus		5200			10.1016/j.bmcl.2009.07.009	http://www.bindingdb.org/jsp/dbsearch/PrimarySearch_ki.jsp?energyterm=kJ/mole&tag=r21&monomerid=50297253&enzyme=3C-like+proteinase+%283CL-PRO%29&column=ki&startPg=0&Increment=50&submit=Search	45271826	CHEMBL551130		ZINC43065223
50155223	Oc1cc(OCc2ccc(Cl)cc2)cc2oc(c(O)c(=O)c12)-c1ccc2OCOc2c1	ZUVXTKFHFLXGGB-UHFFFAOYSA-N	2-Benzo[1,3]dioxol-5-yl-7-(4-chloro-benzyloxy)-3,5-dihydroxy-chromen-4-one::CHEMBL551334	3C-like proteinase (3CL-PRO)	Human SARS coronavirus		>50000			10.1016/j.bmcl.2009.07.009	http://www.bindingdb.org/jsp/dbsearch/PrimarySearch_ki.jsp?energyterm=kJ/mole&tag=r21&monomerid=50297255&enzyme=3C-like+proteinase+%283CL-PRO%29&column=ki&startPg=0&Increment=50&submit=Search	45271831	CHEMBL551334		ZINC43062049
50155224	Oc1cc(O)c2c(c1)oc(-c1ccc3OCOc3c1)c(O)c2=O	KCXWXDGJLDWDTF-UHFFFAOYSA-N	2-Benzo[1,3]dioxol-5-yl-3,5,7-trihydroxy-chromen-4-one::CHEMBL556501	3C-like proteinase (3CL-PRO)	Human SARS coronavirus		>50000			10.1016/j.bmcl.2009.07.009	http://www.bindingdb.org/jsp/dbsearch/PrimarySearch_ki.jsp?energyterm=kJ/mole&tag=r21&monomerid=50297251&enzyme=3C-like+proteinase+%283CL-PRO%29&column=ki&startPg=0&Increment=50&submit=Search	45273625	CHEMBL556501		ZINC43063236
50155225	Oc1ccc(cc1O)-c1oc2cc(OCc3ccc(Cl)cc3)cc(O)c2c(=O)c1O	BYQBMIHQROWCQG-UHFFFAOYSA-N	7-(4-Chloro-benzyloxy)-2-(3,4-dihydroxy-phenyl)-3,5-dihydroxy-chromen-4-one::CHEMBL550256	3C-like proteinase (3CL-PRO)	Human SARS coronavirus		4100			10.1016/j.bmcl.2009.07.009	http://www.bindingdb.org/jsp/dbsearch/PrimarySearch_ki.jsp?energyterm=kJ/mole&tag=r21&monomerid=50297252&enzyme=3C-like+proteinase+%283CL-PRO%29&column=ki&startPg=0&Increment=50&submit=Search	45270979	CHEMBL550256		ZINC43012025
50155226	Oc1cc(OCc2cccc(c2)C#N)cc2oc(c(O)c(=O)c12)-c1ccc2OCOc2c1	HUDLJTDCXGYOKM-UHFFFAOYSA-N	3-(2-Benzo[1,3]dioxol-5-yl-3,5-dihydroxy-4-oxo-4H-chromen-7-yloxymethyl)-benzonitrile::CHEMBL551529	3C-like proteinase (3CL-PRO)	Human SARS coronavirus		8100			10.1016/j.bmcl.2009.07.009	http://www.bindingdb.org/jsp/dbsearch/PrimarySearch_ki.jsp?energyterm=kJ/mole&tag=r21&monomerid=50297257&enzyme=3C-like+proteinase+%283CL-PRO%29&column=ki&startPg=0&Increment=50&submit=Search	45271832	CHEMBL551529		ZINC43061244
50155227	Oc1cc(CNCc2ccc(Cl)cc2)oc2ccc(O)c(=O)c12	VTUYHCLGDXJAAN-UHFFFAOYSA-N	2-[(4-Chloro-benzylamino)-methyl]-5,6-dihydroxy-chromen-4-one::CHEMBL549646	3C-like proteinase (3CL-PRO)	Human SARS coronavirus		>50000			10.1016/j.bmcl.2009.07.009	http://www.bindingdb.org/jsp/dbsearch/PrimarySearch_ki.jsp?energyterm=kJ/mole&tag=r21&monomerid=50297248&enzyme=3C-like+proteinase+%283CL-PRO%29&column=ki&startPg=0&Increment=50&submit=Search	45270971	CHEMBL549646		ZINC43018076
50155228	Oc1cc(CNCc2ccc(Cl)cc2)oc2ccc(O)c(=O)c12	VTUYHCLGDXJAAN-UHFFFAOYSA-N	2-[(4-Chloro-benzylamino)-methyl]-5,6-dihydroxy-chromen-4-one::CHEMBL549646	3C-like proteinase (3CL-PRO)	Human SARS coronavirus		>50000			10.1016/j.bmcl.2009.07.009	http://www.bindingdb.org/jsp/dbsearch/PrimarySearch_ki.jsp?energyterm=kJ/mole&tag=r21&monomerid=50297248&enzyme=3C-like+proteinase+%283CL-PRO%29&column=ki&startPg=0&Increment=50&submit=Search	45270971	CHEMBL549646		ZINC43018076
50155229	Oc1cc(O)c2c(c1)oc(-c1ccc3OCOc3c1)c(O)c2=O	KCXWXDGJLDWDTF-UHFFFAOYSA-N	2-Benzo[1,3]dioxol-5-yl-3,5,7-trihydroxy-chromen-4-one::CHEMBL556501	3C-like proteinase (3CL-PRO)	Human SARS coronavirus		>50000			10.1016/j.bmcl.2009.07.009	http://www.bindingdb.org/jsp/dbsearch/PrimarySearch_ki.jsp?energyterm=kJ/mole&tag=r21&monomerid=50297251&enzyme=3C-like+proteinase+%283CL-PRO%29&column=ki&startPg=0&Increment=50&submit=Search	45273625	CHEMBL556501		ZINC43063236
50155230	Oc1cc(OCc2ccc(Cl)cc2)cc2oc(c(O)c(=O)c12)-c1ccc2OCOc2c1	ZUVXTKFHFLXGGB-UHFFFAOYSA-N	2-Benzo[1,3]dioxol-5-yl-7-(4-chloro-benzyloxy)-3,5-dihydroxy-chromen-4-one::CHEMBL551334	3C-like proteinase (3CL-PRO)	Human SARS coronavirus		9300			10.1016/j.bmcl.2009.07.009	http://www.bindingdb.org/jsp/dbsearch/PrimarySearch_ki.jsp?energyterm=kJ/mole&tag=r21&monomerid=50297255&enzyme=3C-like+proteinase+%283CL-PRO%29&column=ki&startPg=0&Increment=50&submit=Search	45271831	CHEMBL551334		ZINC43062049
50155231	Oc1cc(O)c2c(c1)oc(-c1ccc(O)c(O)c1)c(O)c2=O	REFJWTPEDVJJIY-UHFFFAOYSA-N	2-(3,4-dihydroxyphenyl)-3,5,7-trihydroxy-4H-chromen-4-one::2-(3,4-dihydroxyphenyl)-3,5,7-trihydroxy-chromen-4-one::2-(3,4-dihydroxyphenyl)-3,5,7-trihydroxy-chromone;hydrate::CHEMBL50::Quercetin::Quercetin (10)::Quercetin (21)::Quercetin (Qur)::US9180183, Quercetin::med.21724, Compound 4	3C-like proteinase (3CL-PRO)	Human SARS coronavirus		>50000			10.1016/j.bmcl.2009.07.009	http://www.bindingdb.org/jsp/dbsearch/PrimarySearch_ki.jsp?energyterm=kJ/mole&tag=r21&monomerid=7460&enzyme=3C-like+proteinase+%283CL-PRO%29&column=ki&startPg=0&Increment=50&submit=Search	5280343	CHEMBL50	DB04216	ZINC03869685
50155232	Oc1cc(CNCc2cccc(c2)C#N)oc2ccc(O)c(=O)c12	SPQVVHKCYIGRHU-UHFFFAOYSA-N	3-{[(5,6-Dihydroxy-4-oxo-4H-chromen-2-ylmethyl)-amino]-methyl}-benzonitrile::CHEMBL560392	3C-like proteinase (3CL-PRO)	Human SARS coronavirus		>50000			10.1016/j.bmcl.2009.07.009	http://www.bindingdb.org/jsp/dbsearch/PrimarySearch_ki.jsp?energyterm=kJ/mole&tag=r21&monomerid=50297250&enzyme=3C-like+proteinase+%283CL-PRO%29&column=ki&startPg=0&Increment=50&submit=Search	45269292	CHEMBL560392		ZINC43072302
50155233	Oc1cc(CNCc2cccc(c2)C#N)oc2ccc(O)c(=O)c12	SPQVVHKCYIGRHU-UHFFFAOYSA-N	3-{[(5,6-Dihydroxy-4-oxo-4H-chromen-2-ylmethyl)-amino]-methyl}-benzonitrile::CHEMBL560392	3C-like proteinase (3CL-PRO)	Human SARS coronavirus		>50000			10.1016/j.bmcl.2009.07.009	http://www.bindingdb.org/jsp/dbsearch/PrimarySearch_ki.jsp?energyterm=kJ/mole&tag=r21&monomerid=50297250&enzyme=3C-like+proteinase+%283CL-PRO%29&column=ki&startPg=0&Increment=50&submit=Search	45269292	CHEMBL560392		ZINC43072302
50155234	Oc1cc(O)c2c(c1)oc(-c1ccc(O)c(O)c1)c(O)c2=O	REFJWTPEDVJJIY-UHFFFAOYSA-N	2-(3,4-dihydroxyphenyl)-3,5,7-trihydroxy-4H-chromen-4-one::2-(3,4-dihydroxyphenyl)-3,5,7-trihydroxy-chromen-4-one::2-(3,4-dihydroxyphenyl)-3,5,7-trihydroxy-chromone;hydrate::CHEMBL50::Quercetin::Quercetin (10)::Quercetin (21)::Quercetin (Qur)::US9180183, Quercetin::med.21724, Compound 4	3C-like proteinase (3CL-PRO)	Human SARS coronavirus		8100			10.1016/j.bmcl.2009.07.009	http://www.bindingdb.org/jsp/dbsearch/PrimarySearch_ki.jsp?energyterm=kJ/mole&tag=r21&monomerid=7460&enzyme=3C-like+proteinase+%283CL-PRO%29&column=ki&startPg=0&Increment=50&submit=Search	5280343	CHEMBL50	DB04216	ZINC03869685
50172844	CN(C)CCCNC(=O)C(\NC(=O)c1ccc(C)cc1)=C\c1ccc(o1)-c1ccccc1[N+]([O-])=O	AAVOXWIZJYSGEP-XLNRJJMWSA-N	CHEMBL1315054::MLS001164598::N-[(Z)-1-[3-(dimethylamino)propylcarbamoyl]-2-[5-(2-nitrophenyl)-2-furyl]vinyl]-4-methyl-benzamide::N-[(Z)-3-[3-(dimethylamino)propylamino]-1-[5-(2-nitrophenyl)-2-furanyl]-3-oxoprop-1-en-2-yl]-4-methylbenzamide::N-[(Z)-3-[3-(dimethylamino)propylamino]-1-[5-(2-nitrophenyl)furan-2-yl]-3-oxidanylidene-prop-1-en-2-yl]-4-methyl-benzamide::N-[(Z)-3-[3-(dimethylamino)propyla…	3C-like proteinase (3CL-PRO)	Human SARS coronavirus		41390			10.1016/j.bmcl.2011.03.034	http://www.bindingdb.org/jsp/dbsearch/PrimarySearch_ki.jsp?energyterm=kJ/mole&tag=r21&monomerid=53105&enzyme=3C-like+proteinase+%283CL-PRO%29&column=ki&startPg=0&Increment=50&submit=Search	2131982	CHEMBL1315054		ZINC03375982
50172845	O=C(CSc1ncnc2c1sc1nc(N3CCOCC3)c3CCCCc3c21)NCc1ccco1	FRBXCVPWEKEFKO-UHFFFAOYSA-N	CHEMBL1774326::N-(2-furylmethyl)-2-{[5-(4-morpholinyl)-1,2,3,4-tetrahydropyrimido[4',5':4,5]thieno[2,3-c]isoquinolin-8-yl]thio}acetamide	3C-like proteinase (3CL-PRO)	Human SARS coronavirus		90720			10.1016/j.bmcl.2011.03.034	http://www.bindingdb.org/jsp/dbsearch/PrimarySearch_ki.jsp?energyterm=kJ/mole&tag=r21&monomerid=50343555&enzyme=3C-like+proteinase+%283CL-PRO%29&column=ki&startPg=0&Increment=50&submit=Search	1265413	CHEMBL1774326		ZINC20080272
50172846	Cc1nc(C)c(s1)C(=O)C1C(N(CCCN2CCOCC2)C(=O)C1=O)c1cccc(c1)[N+]([O-])=O	ZXTNQCYQALWFFK-UHFFFAOYSA-N	4-[(2,4-dimethyl-1,3-thiazol-5-yl)carbonyl]-3-hydroxy-1-[3-(4-morpholinyl)propyl]-5-(3-nitrophenyl)-1,5-dihydro-2H-pyrrol-2-one::CHEMBL1774324	3C-like proteinase (3CL-PRO)	Human SARS coronavirus		101380			10.1016/j.bmcl.2011.03.034	http://www.bindingdb.org/jsp/dbsearch/PrimarySearch_ki.jsp?energyterm=kJ/mole&tag=r21&monomerid=50343553&enzyme=3C-like+proteinase+%283CL-PRO%29&column=ki&startPg=0&Increment=50&submit=Search	91932451	CHEMBL1774324		ZINC09353634
50172847	COc1cc(\C=N\NC(=O)C(\NC(=O)c2ccccc2)=C/c2ccccc2)cc(OC)c1O	FNYFSVWJEDFLBU-LZJHMVIHSA-N	CHEMBL1774325::N-(1-{[2-(4-hydroxy-3,5-dimethoxybenzylidene)hydrazino]carbonyl}-2-phenylvinyl)benzamide	3C-like proteinase (3CL-PRO)	Human SARS coronavirus		77090			10.1016/j.bmcl.2011.03.034	http://www.bindingdb.org/jsp/dbsearch/PrimarySearch_ki.jsp?energyterm=kJ/mole&tag=r21&monomerid=50343554&enzyme=3C-like+proteinase+%283CL-PRO%29&column=ki&startPg=0&Increment=50&submit=Search	5341319	CHEMBL1774325		ZINC16671860
50172848	COc1cc(ccc1O)C1C(C(=O)c2ccc(OCC(C)C)cc2C)C(=O)C(=O)N1CCN(C)C	TYGIQOSQHHWZBJ-UHFFFAOYSA-N	1-[2-(dimethylamino)ethyl]-3-hydroxy-5-(4-hydroxy-3-methoxyphenyl)-4-(4-isobutoxy-2-methylbenzoyl)-1,5-dihydro-2H-pyrrol-2-one::CHEMBL1774323	3C-like proteinase (3CL-PRO)	Human SARS coronavirus		62790			10.1016/j.bmcl.2011.03.034	http://www.bindingdb.org/jsp/dbsearch/PrimarySearch_ki.jsp?energyterm=kJ/mole&tag=r21&monomerid=50343552&enzyme=3C-like+proteinase+%283CL-PRO%29&column=ki&startPg=0&Increment=50&submit=Search	4757977	CHEMBL1774323		ZINC09241171
50172849	CN(C)CCCNC(=O)C(\NC(=O)c1ccc(C)cc1)=C\c1ccc(o1)-c1cccc(c1)[N+]([O-])=O	QFOLMPFZCVBCTJ-QJOMJCCJSA-N	MLS001163269::N-[(Z)-1-[3-(dimethylamino)propylcarbamoyl]-2-[5-(3-nitrophenyl)-2-furyl]vinyl]-4-methyl-benzamide::N-[(Z)-3-[3-(dimethylamino)propylamino]-1-[5-(3-nitrophenyl)-2-furanyl]-3-oxoprop-1-en-2-yl]-4-methylbenzamide::N-[(Z)-3-[3-(dimethylamino)propylamino]-1-[5-(3-nitrophenyl)furan-2-yl]-3-oxidanylidene-prop-1-en-2-yl]-4-methyl-benzamide::N-[(Z)-3-[3-(dimethylamino)propylamino]-1-[5-(3-n…	3C-like proteinase (3CL-PRO)	Human SARS coronavirus	9110				10.1016/j.bmcl.2011.03.034	http://www.bindingdb.org/jsp/dbsearch/PrimarySearch_ki.jsp?energyterm=kJ/mole&tag=r21&monomerid=78957&enzyme=3C-like+proteinase+%283CL-PRO%29&column=ki&startPg=0&Increment=50&submit=Search	2131972			ZINC12732678
50172850	Nc1nc(CSc2nnc(-c3cccc4ccccc34)n2-c2ccccc2)cs1	FWUJPPXHEKWVQA-UHFFFAOYSA-N	4-({[5-(1-naphthyl)-4-phenyl-4H-1,2,4-triazol-3-yl]thio}methyl)-1,3-thiazol-2-amine::CHEMBL1774322	3C-like proteinase (3CL-PRO)	Human SARS coronavirus		58350			10.1016/j.bmcl.2011.03.034	http://www.bindingdb.org/jsp/dbsearch/PrimarySearch_ki.jsp?energyterm=kJ/mole&tag=r21&monomerid=50343551&enzyme=3C-like+proteinase+%283CL-PRO%29&column=ki&startPg=0&Increment=50&submit=Search	1328543	CHEMBL1774322		ZINC01159685
50172851	CN(C)CCCNC(=O)C(\NC(=O)c1ccc(C)cc1)=C\c1ccc(o1)-c1cccc(c1)[N+]([O-])=O	QFOLMPFZCVBCTJ-QJOMJCCJSA-N	MLS001163269::N-[(Z)-1-[3-(dimethylamino)propylcarbamoyl]-2-[5-(3-nitrophenyl)-2-furyl]vinyl]-4-methyl-benzamide::N-[(Z)-3-[3-(dimethylamino)propylamino]-1-[5-(3-nitrophenyl)-2-furanyl]-3-oxoprop-1-en-2-yl]-4-methylbenzamide::N-[(Z)-3-[3-(dimethylamino)propylamino]-1-[5-(3-nitrophenyl)furan-2-yl]-3-oxidanylidene-prop-1-en-2-yl]-4-methyl-benzamide::N-[(Z)-3-[3-(dimethylamino)propylamino]-1-[5-(3-n…	3C-like proteinase (3CL-PRO)	Human SARS coronavirus		38570			10.1016/j.bmcl.2011.03.034	http://www.bindingdb.org/jsp/dbsearch/PrimarySearch_ki.jsp?energyterm=kJ/mole&tag=r21&monomerid=78957&enzyme=3C-like+proteinase+%283CL-PRO%29&column=ki&startPg=0&Increment=50&submit=Search	2131972			ZINC12732678
50172852	CN(C)CCCNC(=O)C(\NC(=O)c1ccc(C)cc1)=C\c1ccc(o1)-c1ccccc1[N+]([O-])=O	AAVOXWIZJYSGEP-XLNRJJMWSA-N	CHEMBL1315054::MLS001164598::N-[(Z)-1-[3-(dimethylamino)propylcarbamoyl]-2-[5-(2-nitrophenyl)-2-furyl]vinyl]-4-methyl-benzamide::N-[(Z)-3-[3-(dimethylamino)propylamino]-1-[5-(2-nitrophenyl)-2-furanyl]-3-oxoprop-1-en-2-yl]-4-methylbenzamide::N-[(Z)-3-[3-(dimethylamino)propylamino]-1-[5-(2-nitrophenyl)furan-2-yl]-3-oxidanylidene-prop-1-en-2-yl]-4-methyl-benzamide::N-[(Z)-3-[3-(dimethylamino)propyla…	3C-like proteinase (3CL-PRO)	Human SARS coronavirus	9930				10.1016/j.bmcl.2011.03.034	http://www.bindingdb.org/jsp/dbsearch/PrimarySearch_ki.jsp?energyterm=kJ/mole&tag=r21&monomerid=53105&enzyme=3C-like+proteinase+%283CL-PRO%29&column=ki&startPg=0&Increment=50&submit=Search	2131982	CHEMBL1315054		ZINC03375982
50499675	CC1=NN(C(=O)\C1=C/c1ccc(o1)-c1cc(Cl)ccc1C(O)=O)c1cccc(c1)C(O)=O	RMHAQSDBWLXMGQ-WQRHYEAKSA-N	CHEMBL3810366	3C-like proteinase (3CL-PRO)	Human SARS coronavirus		>50000			10.1016/j.bmc.2016.05.013	http://www.bindingdb.org/jsp/dbsearch/PrimarySearch_ki.jsp?energyterm=kJ/mole&tag=r21&monomerid=50176801&enzyme=3C-like+proteinase+%283CL-PRO%29&column=ki&startPg=0&Increment=50&submit=Search	6026688	CHEMBL3810366
50499676	OC(=O)c1cccc(c1)N1N=C(\C(=C\c2ccc(o2)-c2cc(Cl)ccc2C(O)=O)C1=O)C(F)(F)F	ZMTQIEODEJVNQW-YVLHZVERSA-N	CHEMBL3810109	3C-like proteinase (3CL-PRO)	Human SARS coronavirus		>50000			10.1016/j.bmc.2016.05.013	http://www.bindingdb.org/jsp/dbsearch/PrimarySearch_ki.jsp?energyterm=kJ/mole&tag=r21&monomerid=50176802&enzyme=3C-like+proteinase+%283CL-PRO%29&column=ki&startPg=0&Increment=50&submit=Search	127045387	CHEMBL3810109
50499677	OC(=O)c1cccc(c1)N1N=C(\C(=C/c2ccc(o2)-c2ccccc2C(O)=O)C1=O)C(F)(F)F	DWSJOSLXKQYZQI-GZTJUZNOSA-N	CHEMBL3808558	3C-like proteinase (3CL-PRO)	Human SARS coronavirus		>50000			10.1016/j.bmc.2016.05.013	http://www.bindingdb.org/jsp/dbsearch/PrimarySearch_ki.jsp?energyterm=kJ/mole&tag=r21&monomerid=50176803&enzyme=3C-like+proteinase+%283CL-PRO%29&column=ki&startPg=0&Increment=50&submit=Search	127045392	CHEMBL3808558
50499678	OC(=O)c1cccc(c1)N1N=C(\C(=C\c2ccc(o2)-c2cc(Cl)ccc2C(O)=O)C1=O)c1ccccc1	JNEXOTBREMZSAW-HAHDFKILSA-N	CHEMBL3808795	3C-like proteinase (3CL-PRO)	Human SARS coronavirus		44700			10.1016/j.bmc.2016.05.013	http://www.bindingdb.org/jsp/dbsearch/PrimarySearch_ki.jsp?energyterm=kJ/mole&tag=r21&monomerid=50176804&enzyme=3C-like+proteinase+%283CL-PRO%29&column=ki&startPg=0&Increment=50&submit=Search	127045393	CHEMBL3808795
50499679	CC1=NN(C(=O)\C1=C/c1ccc(o1)-c1cc(Cl)ccc1C(O)=O)c1ccccc1	BOZXTRFDIDZQLX-PDGQHHTCSA-N	CHEMBL3810010	3C-like proteinase (3CL-PRO)	Human SARS coronavirus		>50000			10.1016/j.bmc.2016.05.013	http://www.bindingdb.org/jsp/dbsearch/PrimarySearch_ki.jsp?energyterm=kJ/mole&tag=r21&monomerid=50176805&enzyme=3C-like+proteinase+%283CL-PRO%29&column=ki&startPg=0&Increment=50&submit=Search	127045394	CHEMBL3810010
50499680	OC(=O)c1ccc(Cl)cc1-c1ccc(\C=C2/C(=O)N(N=C2c2ccccc2)c2ccccc2)o1	YIPRRRUTHXSMOT-KQWNVCNZSA-N	CHEMBL3810328	3C-like proteinase (3CL-PRO)	Human SARS coronavirus		16400			10.1016/j.bmc.2016.05.013	http://www.bindingdb.org/jsp/dbsearch/PrimarySearch_ki.jsp?energyterm=kJ/mole&tag=r21&monomerid=50176806&enzyme=3C-like+proteinase+%283CL-PRO%29&column=ki&startPg=0&Increment=50&submit=Search	102341658	CHEMBL3810328
50499681	OC(=O)c1ccc(Cl)cc1-c1ccc(\C=C2/C(=O)N(N=C2c2ccccc2)c2ccc(F)cc2)o1	YQHUXSFPUWHNEN-HAHDFKILSA-N	CHEMBL3808658	3C-like proteinase (3CL-PRO)	Human SARS coronavirus		20200			10.1016/j.bmc.2016.05.013	http://www.bindingdb.org/jsp/dbsearch/PrimarySearch_ki.jsp?energyterm=kJ/mole&tag=r21&monomerid=50176807&enzyme=3C-like+proteinase+%283CL-PRO%29&column=ki&startPg=0&Increment=50&submit=Search	127043455	CHEMBL3808658
50499682	CC(C)c1ccc(cc1)N1N=C(\C(=C\c2ccc(o2)-c2cc(Cl)ccc2C(O)=O)C1=O)c1ccccc1	SVQAGVLZHTXJJV-ONUIUJJFSA-N	CHEMBL3809329	3C-like proteinase (3CL-PRO)	Human SARS coronavirus		6000			10.1016/j.bmc.2016.05.013	http://www.bindingdb.org/jsp/dbsearch/PrimarySearch_ki.jsp?energyterm=kJ/mole&tag=r21&monomerid=50176809&enzyme=3C-like+proteinase+%283CL-PRO%29&column=ki&startPg=0&Increment=50&submit=Search	127043641	CHEMBL3809329
50499683	CC(C)(C)c1ccc(cc1)N1N=C(\C(=C\c2ccc(o2)-c2cc(Cl)ccc2C(O)=O)C1=O)c1ccccc1	FCOYPXSNXIJBGX-ITYLOYPMSA-N	CHEMBL3808427	3C-like proteinase (3CL-PRO)	Human SARS coronavirus		5800			10.1016/j.bmc.2016.05.013	http://www.bindingdb.org/jsp/dbsearch/PrimarySearch_ki.jsp?energyterm=kJ/mole&tag=r21&monomerid=50176810&enzyme=3C-like+proteinase+%283CL-PRO%29&column=ki&startPg=0&Increment=50&submit=Search	127043642	CHEMBL3808427
50499684	O=C1N(N=C(\C1=C\c1ccc(o1)-c1ccccc1)c1ccccc1)c1ccccc1	QPKMQJHQRSKMGY-NKFKGCMQSA-N	CHEMBL3810058	3C-like proteinase (3CL-PRO)	Human SARS coronavirus		>50000			10.1016/j.bmc.2016.05.013	http://www.bindingdb.org/jsp/dbsearch/PrimarySearch_ki.jsp?energyterm=kJ/mole&tag=r21&monomerid=50176811&enzyme=3C-like+proteinase+%283CL-PRO%29&column=ki&startPg=0&Increment=50&submit=Search	127043643	CHEMBL3810058
50499685	OC(=O)c1cccc(c1)N1N=C(\C(=C\c2ccc(o2)-c2ccccc2)C1=O)c1ccccc1	SQOXEZFEMGRSIQ-QJOMJCCJSA-N	CHEMBL3809861	3C-like proteinase (3CL-PRO)	Human SARS coronavirus		6400			10.1016/j.bmc.2016.05.013	http://www.bindingdb.org/jsp/dbsearch/PrimarySearch_ki.jsp?energyterm=kJ/mole&tag=r21&monomerid=50176812&enzyme=3C-like+proteinase+%283CL-PRO%29&column=ki&startPg=0&Increment=50&submit=Search	127043644	CHEMBL3809861
50499686	CC1=NN(C(=O)\C1=C/c1ccc(o1)-c1ccccc1)c1cccc(c1)C(O)=O	UQWUDRZSFFOCJP-UYRXBGFRSA-N	CHEMBL3809159	3C-like proteinase (3CL-PRO)	Human SARS coronavirus		>50000			10.1016/j.bmc.2016.05.013	http://www.bindingdb.org/jsp/dbsearch/PrimarySearch_ki.jsp?energyterm=kJ/mole&tag=r21&monomerid=50176813&enzyme=3C-like+proteinase+%283CL-PRO%29&column=ki&startPg=0&Increment=50&submit=Search	50885062	CHEMBL3809159
50499687	OC(=O)c1ccccc1-c1ccc(\C=C2/C(=O)N(N=C2c2ccccc2)c2ccccc2)o1	FPDHFAJPJUEJDC-QJOMJCCJSA-N	CHEMBL3810361	3C-like proteinase (3CL-PRO)	Human SARS coronavirus		41200			10.1016/j.bmc.2016.05.013	http://www.bindingdb.org/jsp/dbsearch/PrimarySearch_ki.jsp?energyterm=kJ/mole&tag=r21&monomerid=50176814&enzyme=3C-like+proteinase+%283CL-PRO%29&column=ki&startPg=0&Increment=50&submit=Search	127043645	CHEMBL3810361
50499688	OC(=O)c1ccccc1-c1ccc(\C=C2/C(=O)N(N=C2c2ccccc2)c2ccc(F)cc2)o1	XKQCHIXXQNMHLJ-KQWNVCNZSA-N	CHEMBL3810325	3C-like proteinase (3CL-PRO)	Human SARS coronavirus		37500			10.1016/j.bmc.2016.05.013	http://www.bindingdb.org/jsp/dbsearch/PrimarySearch_ki.jsp?energyterm=kJ/mole&tag=r21&monomerid=50176856&enzyme=3C-like+proteinase+%283CL-PRO%29&column=ki&startPg=0&Increment=50&submit=Search	102341659	CHEMBL3810325
50499689	CC(C)c1ccc(cc1)N1N=C(\C(=C\c2ccc(o2)-c2ccccc2C(O)=O)C1=O)c1ccccc1	IZZUJMWOAXHUTE-ITYLOYPMSA-N	CHEMBL3809506	3C-like proteinase (3CL-PRO)	Human SARS coronavirus		11700			10.1016/j.bmc.2016.05.013	http://www.bindingdb.org/jsp/dbsearch/PrimarySearch_ki.jsp?energyterm=kJ/mole&tag=r21&monomerid=50176857&enzyme=3C-like+proteinase+%283CL-PRO%29&column=ki&startPg=0&Increment=50&submit=Search	127045220	CHEMBL3809506
50499690	CC(C)(C)c1ccc(cc1)N1N=C(\C(=C\c2ccc(o2)-c2ccccc2C(O)=O)C1=O)c1ccccc1	XWFZHLYIOFAQRH-XHPQRKPJSA-N	CHEMBL3809579	3C-like proteinase (3CL-PRO)	Human SARS coronavirus		8600			10.1016/j.bmc.2016.05.013	http://www.bindingdb.org/jsp/dbsearch/PrimarySearch_ki.jsp?energyterm=kJ/mole&tag=r21&monomerid=50176858&enzyme=3C-like+proteinase+%283CL-PRO%29&column=ki&startPg=0&Increment=50&submit=Search	127045221	CHEMBL3809579
50499691	OC(=O)c1ccccc1-c1ccc(\C=C2/C(=O)N(N=C2c2ccccc2)c2ccc(cc2)C#N)o1	FZYKSLVCMHDYQR-JLPGSUDCSA-N	CHEMBL3809498	3C-like proteinase (3CL-PRO)	Human SARS coronavirus		18700			10.1016/j.bmc.2016.05.013	http://www.bindingdb.org/jsp/dbsearch/PrimarySearch_ki.jsp?energyterm=kJ/mole&tag=r21&monomerid=50176859&enzyme=3C-like+proteinase+%283CL-PRO%29&column=ki&startPg=0&Increment=50&submit=Search	127045222	CHEMBL3809498
50499692	COc1ccc(cc1)N1N=C(\C(=C\c2ccc(o2)-c2ccccc2C(O)=O)C1=O)c1ccccc1	SKEVDQNJWPPYIJ-ULJHMMPZSA-N	CHEMBL3809059	3C-like proteinase (3CL-PRO)	Human SARS coronavirus		30700			10.1016/j.bmc.2016.05.013	http://www.bindingdb.org/jsp/dbsearch/PrimarySearch_ki.jsp?energyterm=kJ/mole&tag=r21&monomerid=50176860&enzyme=3C-like+proteinase+%283CL-PRO%29&column=ki&startPg=0&Increment=50&submit=Search	127045227	CHEMBL3809059
50499693	OC(=O)c1cccc(c1)N1N=C(\C(=C\c2ccco2)C1=O)c1ccccc1	HPJRFNJSAWHFEU-AQTBWJFISA-N	CHEMBL3809833	3C-like proteinase (3CL-PRO)	Human SARS coronavirus		>50000			10.1016/j.bmc.2016.05.013	http://www.bindingdb.org/jsp/dbsearch/PrimarySearch_ki.jsp?energyterm=kJ/mole&tag=r21&monomerid=50176861&enzyme=3C-like+proteinase+%283CL-PRO%29&column=ki&startPg=0&Increment=50&submit=Search	127045228	CHEMBL3809833
50499694	OC(=O)c1cccc(c1)N1N=C(\C(=C\c2ccc(cc2)-c2ccccc2)C1=O)c1ccccc1	BWJHOHOWSONGSI-ITYLOYPMSA-N	CHEMBL3809053	3C-like proteinase (3CL-PRO)	Human SARS coronavirus		6700			10.1016/j.bmc.2016.05.013	http://www.bindingdb.org/jsp/dbsearch/PrimarySearch_ki.jsp?energyterm=kJ/mole&tag=r21&monomerid=50176862&enzyme=3C-like+proteinase+%283CL-PRO%29&column=ki&startPg=0&Increment=50&submit=Search	127045229	CHEMBL3809053
50499695	OC(=O)c1cccc(c1)N1N=C(\C(=C\c2ccc(OCc3ccccc3)cc2)C1=O)c1ccccc1	YTINGXAULBAGRW-IMRQLAEWSA-N	CHEMBL3809926	3C-like proteinase (3CL-PRO)	Human SARS coronavirus		15700			10.1016/j.bmc.2016.05.013	http://www.bindingdb.org/jsp/dbsearch/PrimarySearch_ki.jsp?energyterm=kJ/mole&tag=r21&monomerid=50176863&enzyme=3C-like+proteinase+%283CL-PRO%29&column=ki&startPg=0&Increment=50&submit=Search	127045386	CHEMBL3809926
51059220	[Na+].CC(C)C[C@H](NC(=O)OC1CCN(CC1)S(C)(=O)=O)C(=O)N[C@@H](C[C@@H]1CCNC1=O)C(O)S([O-])(=O)=O	OXYUFTIDAUNJGP-KEWDJMNSSA-M	CHEMBL4213159	3C-like proteinase (3CL-PRO)	Human SARS coronavirus		42100			10.1016/j.ejmech.2018.03.004	http://www.bindingdb.org/jsp/dbsearch/PrimarySearch_ki.jsp?energyterm=kJ/mole&tag=r21&monomerid=50458463&enzyme=3C-like+proteinase+%283CL-PRO%29&column=ki&startPg=0&Increment=50&submit=Search	145964420
51059226	[Na+].CC(C)C[C@H](NC(=O)OC1CCN(CC1)C(=O)OC(C)(C)C)C(=O)N[C@@H](C[C@@H]1CCNC1=O)C(O)S([O-])(=O)=O	MVNGOUPOTIVRRK-FCSMXUNPSA-M	CHEMBL4208240	3C-like proteinase (3CL-PRO)	Human SARS coronavirus		5100			10.1016/j.ejmech.2018.03.004	http://www.bindingdb.org/jsp/dbsearch/PrimarySearch_ki.jsp?energyterm=kJ/mole&tag=r21&monomerid=50458469&enzyme=3C-like+proteinase+%283CL-PRO%29&column=ki&startPg=0&Increment=50&submit=Search	145975487
51059227	CC(C)C[C@H](NC(=O)OC1CCN(CC1)S(C)(=O)=O)C(=O)N[C@@H](C[C@@H]1CCNC1=O)C=O	POHZAMMIKLXFHR-ZOBUZTSGSA-N	CHEMBL4209146	3C-like proteinase (3CL-PRO)	Human SARS coronavirus		28800			10.1016/j.ejmech.2018.03.004	http://www.bindingdb.org/jsp/dbsearch/PrimarySearch_ki.jsp?energyterm=kJ/mole&tag=r21&monomerid=50458470&enzyme=3C-like+proteinase+%283CL-PRO%29&column=ki&startPg=0&Increment=50&submit=Search	145964710
51059228	[Na+].CC(C)C[C@H](NC(=O)OC1(Cc2ccccc2)CCN(CC1)S(C)(=O)=O)C(=O)N[C@@H](C[C@@H]1CCNC1=O)C(O)S([O-])(=O)=O	PVFOFJYHUDKJAA-FLABFKKQSA-M	CHEMBL4208764	3C-like proteinase (3CL-PRO)	Human SARS coronavirus		4300			10.1016/j.ejmech.2018.03.004	http://www.bindingdb.org/jsp/dbsearch/PrimarySearch_ki.jsp?energyterm=kJ/mole&tag=r21&monomerid=50458466&enzyme=3C-like+proteinase+%283CL-PRO%29&column=ki&startPg=0&Increment=50&submit=Search	145967285
51059229	CC(C)C[C@H](NC(=O)OC1(Cc2ccccc2)CCN(CC1)C(=O)OC(C)(C)C)C(=O)N[C@@H](C[C@@H]1CCNC1=O)C=O	UGEDYCZHWKTZHO-SDHOMARFSA-N	CHEMBL4202812	3C-like proteinase (3CL-PRO)	Human SARS coronavirus		5200			10.1016/j.ejmech.2018.03.004	http://www.bindingdb.org/jsp/dbsearch/PrimarySearch_ki.jsp?energyterm=kJ/mole&tag=r21&monomerid=50458464&enzyme=3C-like+proteinase+%283CL-PRO%29&column=ki&startPg=0&Increment=50&submit=Search	145976006
51059516	CCC1(CCN(CC1)C(=O)OC(C)(C)C)OC(=O)N[C@@H](CC(C)C)C(=O)N[C@@H](C[C@@H]1CCNC1=O)C=O	HTGYFQGYLZPRLD-UFYCRDLUSA-N	CHEMBL4212620	3C-like proteinase (3CL-PRO)	Human SARS coronavirus		5500			10.1016/j.ejmech.2018.03.004	http://www.bindingdb.org/jsp/dbsearch/PrimarySearch_ki.jsp?energyterm=kJ/mole&tag=r21&monomerid=50458467&enzyme=3C-like+proteinase+%283CL-PRO%29&column=ki&startPg=0&Increment=50&submit=Search	145964401
51059517	[Na+].CCC1(CCN(CC1)C(=O)OC(C)(C)C)OC(=O)N[C@@H](CC(C)C)C(=O)N[C@@H](C[C@@H]1CCNC1=O)C(O)S([O-])(=O)=O	LSFQRCABQFHJEZ-FIGVUBRSSA-M	CHEMBL4216101	3C-like proteinase (3CL-PRO)	Human SARS coronavirus		4100			10.1016/j.ejmech.2018.03.004	http://www.bindingdb.org/jsp/dbsearch/PrimarySearch_ki.jsp?energyterm=kJ/mole&tag=r21&monomerid=50458468&enzyme=3C-like+proteinase+%283CL-PRO%29&column=ki&startPg=0&Increment=50&submit=Search	145972809
51059525	[Na+].CC(C)C[C@H](NC(=O)OC1(Cc2ccccc2)CCN(CC1)C(=O)OC(C)(C)C)C(=O)N[C@@H](C[C@@H]1CCNC1=O)C(O)S([O-])(=O)=O	GODLXHBNULFSDU-WYYMQYPJSA-M	CHEMBL4203883	3C-like proteinase (3CL-PRO)	Human SARS coronavirus		6300			10.1016/j.ejmech.2018.03.004	http://www.bindingdb.org/jsp/dbsearch/PrimarySearch_ki.jsp?energyterm=kJ/mole&tag=r21&monomerid=50458465&enzyme=3C-like+proteinase+%283CL-PRO%29&column=ki&startPg=0&Increment=50&submit=Search	145975081
51059528	CC(C)C[C@H](NC(=O)OC1CCN(CC1)C(=O)OC(C)(C)C)C(=O)N[C@@H](C[C@@H]1CCNC1=O)C=O	SBHUNCJSGGMNPS-LNLFQRSKSA-N	CHEMBL4214066	3C-like proteinase (3CL-PRO)	Human SARS coronavirus		2100			10.1016/j.ejmech.2018.03.004	http://www.bindingdb.org/jsp/dbsearch/PrimarySearch_ki.jsp?energyterm=kJ/mole&tag=r21&monomerid=50458462&enzyme=3C-like+proteinase+%283CL-PRO%29&column=ki&startPg=0&Increment=50&submit=Search	145966788
51059529	[Na+].CCOC(=O)N1CCC(CC1)OC(=O)N[C@@H](CC(C)C)C(=O)N[C@@H](C[C@@H]1CCNC1=O)C(O)S([O-])(=O)=O	FTLUCMWMNGOWPX-OPOLGWMESA-M	CHEMBL4204431	3C-like proteinase (3CL-PRO)	Human SARS coronavirus		8800			10.1016/j.ejmech.2018.03.004	http://www.bindingdb.org/jsp/dbsearch/PrimarySearch_ki.jsp?energyterm=kJ/mole&tag=r21&monomerid=50458471&enzyme=3C-like+proteinase+%283CL-PRO%29&column=ki&startPg=0&Increment=50&submit=Search	145978039
51059536	CC(C)C[C@H](NC(=O)OC1(Cc2ccccc2)CCN(CC1)S(C)(=O)=O)C(=O)N[C@@H](C[C@@H]1CCNC1=O)C=O	ZLOZUJAXLMKVNG-VABKMULXSA-N	CHEMBL4214471	3C-like proteinase (3CL-PRO)	Human SARS coronavirus		3900			10.1016/j.ejmech.2018.03.004	http://www.bindingdb.org/jsp/dbsearch/PrimarySearch_ki.jsp?energyterm=kJ/mole&tag=r21&monomerid=50458473&enzyme=3C-like+proteinase+%283CL-PRO%29&column=ki&startPg=0&Increment=50&submit=Search	145972736
51059537	CCOC(=O)N1CCC(CC1)OC(=O)N[C@@H](CC(C)C)C(=O)N[C@@H](C[C@@H]1CCNC1=O)C=O	YYTRYFVBTGDGMR-BQFCYCMXSA-N	CHEMBL4217568	3C-like proteinase (3CL-PRO)	Human SARS coronavirus		3200			10.1016/j.ejmech.2018.03.004	http://www.bindingdb.org/jsp/dbsearch/PrimarySearch_ki.jsp?energyterm=kJ/mole&tag=r21&monomerid=50458472&enzyme=3C-like+proteinase+%283CL-PRO%29&column=ki&startPg=0&Increment=50&submit=Search	145972878
51164206	CCOC(=O)\C=C\[C@H](C[C@@H]1CCNC1=O)NC(=O)[C@H](CC(C)C)NC(=O)[C@@H](NC(=O)c1cc(C)on1)C(C)C	XRQABLDUWKEZML-PTTVIHCQSA-N	CHEMBL393608	3C-like proteinase (3CL-PRO)	Human SARS coronavirus		200000			10.1016/j.bmcl.2007.08.031	http://www.bindingdb.org/jsp/dbsearch/PrimarySearch_ki.jsp?energyterm=kJ/mole&tag=r21&monomerid=50477127&enzyme=3C-like+proteinase+%283CL-PRO%29&column=ki&startPg=0&Increment=50&submit=Search	44433699
51164207	CCOC(=O)\C=C\[C@H](C[C@@H]1CCNC1=O)NC(=O)[C@@H](CC(=O)[C@@H](NC(=O)c1cc(C)on1)C(C)C)Cc1ccccc1	DHTSLDPANDNYNQ-SJNZOZTPSA-N	AG7088 analogue 1c::CHEMBL194398::ethyl (2E,4S)-4-[(2R,5S)-2-benzyl-6-methyl-5-[(5-methyl-1,2-oxazol-3-yl)formamido]-4-oxoheptanamido]-5-[(3S)-2-oxopyrrolidin-3-yl]pent-2-enoate	3C-like proteinase (3CL-PRO)	Human SARS coronavirus		870000			10.1016/j.bmcl.2007.08.031	http://www.bindingdb.org/jsp/dbsearch/PrimarySearch_ki.jsp?energyterm=kJ/mole&tag=r21&monomerid=11245&enzyme=3C-like+proteinase+%283CL-PRO%29&column=ki&startPg=0&Increment=50&submit=Search	11642725	CHEMBL194398		ZINC14947885
51164208	CCOC(=O)\C=C\[C@H](C[C@@H]1CCNC1=O)NC(=O)[C@H](Cc1ccccc1)NC(=O)[C@@H](NC(=O)c1cc(C)on1)C(C)C	PANGWSCMXDVPFP-BNQYSQCVSA-N	AG7088 analogue 2c::ethyl (2E,4S)-4-[(2S)-2-[(2S)-3-methyl-2-[(5-methyl-1,2-oxazol-3-yl)formamido]butanamido]-3-phenylpropanamido]-5-[(3S)-2-oxopyrrolidin-3-yl]pent-2-enoate	3C-like proteinase (3CL-PRO)	Human SARS coronavirus		300000			10.1016/j.bmcl.2007.08.031	http://www.bindingdb.org/jsp/dbsearch/PrimarySearch_ki.jsp?energyterm=kJ/mole&tag=r21&monomerid=11249&enzyme=3C-like+proteinase+%283CL-PRO%29&column=ki&startPg=0&Increment=50&submit=Search	15956553			ZINC14947896
51164209	CCOC(=O)\C=C\[C@H](C[C@@H]1CCNC1=O)NC(=O)[C@H](CC=C(C)C)CC(=O)[C@@H](NC(=O)[C@H](CO)NC(=O)OC(C)(C)C)C(C)C	ZQTRLNLQBUBFLO-OROCXDGXSA-N	CHEMBL238217::GRL-0155S	3C-like proteinase (3CL-PRO)	Human SARS coronavirus		80000			10.1016/j.bmcl.2007.08.031	http://www.bindingdb.org/jsp/dbsearch/PrimarySearch_ki.jsp?energyterm=kJ/mole&tag=r21&monomerid=50477128&enzyme=3C-like+proteinase+%283CL-PRO%29&column=ki&startPg=0&Increment=50&submit=Search	44433696
51164210	CCOC(=O)\C=C\[C@H](C[C@@H]1CCNC1=O)NC(=O)[C@H](CC(C)C)NC(=O)[C@@H](NC(=O)[C@H](CO)NC(=O)OC(C)(C)C)C(C)C	JQGRQEJSWFZWOD-IDAOPYDCSA-N	CHEMBL397154	3C-like proteinase (3CL-PRO)	Human SARS coronavirus		10000			10.1016/j.bmcl.2007.08.031	http://www.bindingdb.org/jsp/dbsearch/PrimarySearch_ki.jsp?energyterm=kJ/mole&tag=r21&monomerid=50477129&enzyme=3C-like+proteinase+%283CL-PRO%29&column=ki&startPg=0&Increment=50&submit=Search	44433697
51164211	CCOC(=O)\C=C\[C@H](C[C@@H]1CCNC1=O)NC(=O)[C@H](CC=C(C)C)CC(=O)[C@@H](NC(=O)c1cc(C)on1)C(C)C	CSNQHKJCKPMZCY-YFUAOJPXSA-N	(S,E)-ethyl 4-((2R,5S)-6-methyl-2-(3-methylbut-2-enyl)-5-(5-methylisoxazole-3-carboxamido)-4-oxoheptanamido)-5-((S)-2-oxopyrrolidin-3-yl)pent-2-enoate::4-{(1R,5S)-6-Methyl-2-(3-methyl-but-2-enyl)-5-[((S)-5-methyl-isoxazole-3-carbonyl)-amino]-4-oxo-heptanoylamino}-5-((S)-2-oxo-pyrrolidin-3-yl)-pent-2-enoic acid ethyl ester::CHEMBL196635::N-((3S,6R)-6-((S,E)-4-ETHOXYCARBONYL-1-((S)-2-OXOPYRROLIDIN-…	3C-like proteinase (3CL-PRO)	Human SARS coronavirus		800000			10.1016/j.bmcl.2007.08.031	http://www.bindingdb.org/jsp/dbsearch/PrimarySearch_ki.jsp?energyterm=kJ/mole&tag=r21&monomerid=50176014&enzyme=3C-like+proteinase+%283CL-PRO%29&column=ki&startPg=0&Increment=50&submit=Search	10062715	CHEMBL196635		ZINC28526050
51164212	CCOC(=O)\C=C\[C@H](C[C@@H]1CCNC1=O)NC(=O)[C@H](Cc1ccccc1)NC(=O)[C@@H](NC(=O)[C@H](CO)NC(=O)OC(C)(C)C)C(C)C	KIZUZFOIPSGEGW-FJKQJCGTSA-N	CHEMBL235873	3C-like proteinase (3CL-PRO)	Human SARS coronavirus		15000			10.1016/j.bmcl.2007.08.031	http://www.bindingdb.org/jsp/dbsearch/PrimarySearch_ki.jsp?energyterm=kJ/mole&tag=r21&monomerid=50477130&enzyme=3C-like+proteinase+%283CL-PRO%29&column=ki&startPg=0&Increment=50&submit=Search	44433698
51170453	[Cl-].CCN1\C(Sc2ccc(cc12)-c1nc2ccccc2s1)=C/C=C/c1sc2ccc(cc2[n+]1CC)-c1nc2ccccc2s1	BFOLNEWQIMULFP-UHFFFAOYSA-N	CHEMBL541163	3C-like proteinase (3CL-PRO)	Human SARS coronavirus		2500			10.1128/aac.00408-07	http://www.bindingdb.org/jsp/dbsearch/PrimarySearch_ki.jsp?energyterm=kJ/mole&tag=r21&monomerid=50480130&enzyme=3C-like+proteinase+%283CL-PRO%29&column=ki&startPg=0&Increment=50&submit=Search	45266425
51170454	CCN1\C(Sc2ccccc12)=C/C=C/C1=C/C(/CC(C)C1)=C/c1sc2ccccc2[n+]1CC	ITFYGTSQODOIQX-UHFFFAOYSA-N	CHEMBL478119	3C-like proteinase (3CL-PRO)	Human SARS coronavirus		2000			10.1128/aac.00408-07	http://www.bindingdb.org/jsp/dbsearch/PrimarySearch_ki.jsp?energyterm=kJ/mole&tag=r21&monomerid=50480131&enzyme=3C-like+proteinase+%283CL-PRO%29&column=ki&startPg=0&Increment=50&submit=Search	16061499
51170455	CCN1\C(Sc2ccccc12)=C/C=c1\s\c(=C/c2sc3ccccc3[n+]2CC)n(CC)c1=O	QMGLWCMVRUCPAP-XRBXDRSNSA-N	CHEMBL478987	3C-like proteinase (3CL-PRO)	Human SARS coronavirus		10000			10.1128/aac.00408-07	http://www.bindingdb.org/jsp/dbsearch/PrimarySearch_ki.jsp?energyterm=kJ/mole&tag=r21&monomerid=50480132&enzyme=3C-like+proteinase+%283CL-PRO%29&column=ki&startPg=0&Increment=50&submit=Search	135452883
51170456	[Cl-].CCN1\C(SC(=C1c1ccccc1)c1ccccc1)=C/C=C/c1sc2c(ccc3ccccc23)[n+]1CC	IWXQOLGOBSGSDG-UHFFFAOYSA-N	CHEMBL540403	3C-like proteinase (3CL-PRO)	Human SARS coronavirus		3800			10.1128/aac.00408-07	http://www.bindingdb.org/jsp/dbsearch/PrimarySearch_ki.jsp?energyterm=kJ/mole&tag=r21&monomerid=50480133&enzyme=3C-like+proteinase+%283CL-PRO%29&column=ki&startPg=0&Increment=50&submit=Search	45266482
51170457	CCN1\C(Sc2cc(C)c(C)cc12)=C/C(/CC)=C/c1sc2c(ccc3ccccc23)[n+]1CC	ILOBGOMQHCDPQT-UHFFFAOYSA-N	CHEMBL479172	3C-like proteinase (3CL-PRO)	Human SARS coronavirus		5400			10.1128/aac.00408-07	http://www.bindingdb.org/jsp/dbsearch/PrimarySearch_ki.jsp?energyterm=kJ/mole&tag=r21&monomerid=50480134&enzyme=3C-like+proteinase+%283CL-PRO%29&column=ki&startPg=0&Increment=50&submit=Search	44584893
51170458	[Cl-].CCN1\C(Sc2cc(\C=C\c3ccccc3)ccc12)=C/C(/CC)=C/c1sc2cc(C)c(C)cc2[n+]1CC	CKVANKOEGHJGFB-CCEZHUSRSA-N	CHEMBL558828	3C-like proteinase (3CL-PRO)	Human SARS coronavirus		6600			10.1128/aac.00408-07	http://www.bindingdb.org/jsp/dbsearch/PrimarySearch_ki.jsp?energyterm=kJ/mole&tag=r21&monomerid=50480135&enzyme=3C-like+proteinase+%283CL-PRO%29&column=ki&startPg=0&Increment=50&submit=Search	45266488
51170459	CCN1\C(Sc2ccc(OC)cc12)=C/C(/OC)=C\c1sc2ccccc2[n+]1CCCS([O-])(=O)=O	YGIKJGIQWDUYOD-UHFFFAOYSA-N	CHEMBL515787	3C-like proteinase (3CL-PRO)	Human SARS coronavirus		7300			10.1128/aac.00408-07	http://www.bindingdb.org/jsp/dbsearch/PrimarySearch_ki.jsp?energyterm=kJ/mole&tag=r21&monomerid=50480136&enzyme=3C-like+proteinase+%283CL-PRO%29&column=ki&startPg=0&Increment=50&submit=Search	44584944
51170460	C1CC(\C=C2\CC[n+]3c2sc2ccccc32)=C2Sc3ccccc3N12	HEZXQAGUUUWOJB-UHFFFAOYSA-N	CHEMBL518593	3C-like proteinase (3CL-PRO)	Human SARS coronavirus		10500			10.1128/aac.00408-07	http://www.bindingdb.org/jsp/dbsearch/PrimarySearch_ki.jsp?energyterm=kJ/mole&tag=r21&monomerid=50480137&enzyme=3C-like+proteinase+%283CL-PRO%29&column=ki&startPg=0&Increment=50&submit=Search	5958938
51171105	CC(C)C[C@H](NC(=O)[C@@H](NC(=O)OCc1ccccc1)C(C)C)C(=O)N[C@@H](CCC(O)=O)C(=O)C(F)(F)F	YLUXVNBHWOCFLK-BJLQDIEVSA-N	CHEMBL551569::med.21724, Compound 69	3C-like proteinase (3CL-PRO)	Human SARS coronavirus	116000				10.1016/j.bmcl.2009.03.118	http://www.bindingdb.org/jsp/dbsearch/PrimarySearch_ki.jsp?energyterm=kJ/mole&tag=r21&monomerid=50480487&enzyme=3C-like+proteinase+%283CL-PRO%29&column=ki&startPg=0&Increment=50&submit=Search	16085283
51171106	CC(C)C[C@H](NC(=O)[C@@H](NC(=O)OCc1ccccc1)C(C)C)C(=O)N[C@@H](CCC(=O)N1CCOCC1)C(=O)C(F)(F)F	FJHQYYMVIUHRDC-FIXSFTCYSA-N	CHEMBL555061::med.21724, Compound 70	3C-like proteinase (3CL-PRO)	Human SARS coronavirus	21000				10.1016/j.bmcl.2009.03.118	http://www.bindingdb.org/jsp/dbsearch/PrimarySearch_ki.jsp?energyterm=kJ/mole&tag=r21&monomerid=50480488&enzyme=3C-like+proteinase+%283CL-PRO%29&column=ki&startPg=0&Increment=50&submit=Search	45269761
51171107	CCN(CC)C(=O)CC[C@H](NC(=O)[C@@H](NC(=O)OCc1ccccc1)C(C)C)C(=O)c1nc2ccccc2s1	QMBOFCUEWBXCOL-DHLKQENFSA-N	CHEMBL557699	3C-like proteinase (3CL-PRO)	Human SARS coronavirus	159000				10.1016/j.bmcl.2009.03.118	http://www.bindingdb.org/jsp/dbsearch/PrimarySearch_ki.jsp?energyterm=kJ/mole&tag=r21&monomerid=50480489&enzyme=3C-like+proteinase+%283CL-PRO%29&column=ki&startPg=0&Increment=50&submit=Search	45273184
51171108	CCCN(CCC)C(=O)CC[C@H](NC(=O)[C@H](CC(C)C)NC(=O)[C@@H](NC(=O)[C@H](C)NC(=O)OCc1ccccc1)C(C)C)C(=O)C(F)(F)F	RNZGLPULHIKMGO-XCDZTUSXSA-N	CHEMBL537916	3C-like proteinase (3CL-PRO)	Human SARS coronavirus	297000				10.1016/j.bmcl.2009.03.118	http://www.bindingdb.org/jsp/dbsearch/PrimarySearch_ki.jsp?energyterm=kJ/mole&tag=r21&monomerid=50480490&enzyme=3C-like+proteinase+%283CL-PRO%29&column=ki&startPg=0&Increment=50&submit=Search	45269762
51171109	CCCN(CCC)C(=O)CC[C@H](NC(=O)[C@H](CC(C)C)NC(=O)OCc1ccccc1)C(=O)C(F)(F)F	APFSDMPVIMYHIW-SFTDATJTSA-N	CHEMBL551181	3C-like proteinase (3CL-PRO)	Human SARS coronavirus	584000				10.1016/j.bmcl.2009.03.118	http://www.bindingdb.org/jsp/dbsearch/PrimarySearch_ki.jsp?energyterm=kJ/mole&tag=r21&monomerid=50480491&enzyme=3C-like+proteinase+%283CL-PRO%29&column=ki&startPg=0&Increment=50&submit=Search	45269763
51171110	CC(C)C[C@H](NC(=O)[C@@H](NC(=O)OCc1ccccc1)C(C)C)C(=O)N[C@@H](CCC(=O)N1CCOCC1)C(=O)c1nccs1	DFKJDRAUDBLYQE-GNKBHMEESA-N	CHEMBL555062	3C-like proteinase (3CL-PRO)	Human SARS coronavirus	478000				10.1016/j.bmcl.2009.03.118	http://www.bindingdb.org/jsp/dbsearch/PrimarySearch_ki.jsp?energyterm=kJ/mole&tag=r21&monomerid=50480492&enzyme=3C-like+proteinase+%283CL-PRO%29&column=ki&startPg=0&Increment=50&submit=Search	45269764
51171111	CC(C)C[C@H](NC(=O)[C@@H](NC(=O)OCc1ccccc1)C(C)C)C(=O)N[C@@H](C[C@@H]1CCNC1=O)C(=O)c1nccs1	NHPGFNNCMAVKMC-MLCQCVOFSA-N	CHEMBL539209::jm5b01461, Compound 58	3C-like proteinase (3CL-PRO)	Human SARS coronavirus	2200				10.1016/j.bmcl.2009.03.118	http://www.bindingdb.org/jsp/dbsearch/PrimarySearch_ki.jsp?energyterm=kJ/mole&tag=r21&monomerid=50480493&enzyme=3C-like+proteinase+%283CL-PRO%29&column=ki&startPg=0&Increment=50&submit=Search	45272306
51171112	CCN(CC)C(=O)CC[C@H](NC(=O)[C@H](CC(C)C)NC(=O)OCc1ccccc1)C(=O)c1nccs1	DZERDEYKIHURKG-SFTDATJTSA-N	CHEMBL551504	3C-like proteinase (3CL-PRO)	Human SARS coronavirus	462000				10.1016/j.bmcl.2009.03.118	http://www.bindingdb.org/jsp/dbsearch/PrimarySearch_ki.jsp?energyterm=kJ/mole&tag=r21&monomerid=50480494&enzyme=3C-like+proteinase+%283CL-PRO%29&column=ki&startPg=0&Increment=50&submit=Search	45271412
51171113	CC(C)C[C@H](NC(=O)[C@@H](NC(=O)OCc1ccccc1)C(C)C)C(=O)N[C@@H](CCC(=O)N(C)Cc1ccccc1)C(=O)C(F)(F)F	KWKOCNNYZPGQAO-NSVAZKTRSA-N	CHEMBL555220	3C-like proteinase (3CL-PRO)	Human SARS coronavirus	34100				10.1016/j.bmcl.2009.03.118	http://www.bindingdb.org/jsp/dbsearch/PrimarySearch_ki.jsp?energyterm=kJ/mole&tag=r21&monomerid=50480495&enzyme=3C-like+proteinase+%283CL-PRO%29&column=ki&startPg=0&Increment=50&submit=Search	45272304
51171114	CCN(CC)C(=O)CC[C@H](NC(=O)[C@H](CC(C)C)NC(=O)[C@@H](NC(=O)OCc1ccccc1)C(C)C)C(=O)c1nccs1	HOSKYYVLDSUHCJ-GNKBHMEESA-N	CHEMBL555221	3C-like proteinase (3CL-PRO)	Human SARS coronavirus	112000				10.1016/j.bmcl.2009.03.118	http://www.bindingdb.org/jsp/dbsearch/PrimarySearch_ki.jsp?energyterm=kJ/mole&tag=r21&monomerid=50480496&enzyme=3C-like+proteinase+%283CL-PRO%29&column=ki&startPg=0&Increment=50&submit=Search	45272305
51171115	CCN(CC)C(=O)CC[C@H](NC(=O)[C@@H](NC(=O)OCc1ccccc1)C(C)C)C(=O)c1nccs1	REJHQVOMKVPZKD-FPOVZHCZSA-N	CHEMBL557291	3C-like proteinase (3CL-PRO)	Human SARS coronavirus	614000				10.1016/j.bmcl.2009.03.118	http://www.bindingdb.org/jsp/dbsearch/PrimarySearch_ki.jsp?energyterm=kJ/mole&tag=r21&monomerid=50480497&enzyme=3C-like+proteinase+%283CL-PRO%29&column=ki&startPg=0&Increment=50&submit=Search	45273179
51171116	CCCN(CCC)C(=O)CC[C@H](NC(=O)[C@H](CC(C)C)NC(=O)[C@@H](NC(=O)OCc1ccccc1)C(C)C)C(=O)C(F)(F)F	MOAKAVJNXPOQBD-GNKBHMEESA-N	CHEMBL539208	3C-like proteinase (3CL-PRO)	Human SARS coronavirus	363000				10.1016/j.bmcl.2009.03.118	http://www.bindingdb.org/jsp/dbsearch/PrimarySearch_ki.jsp?energyterm=kJ/mole&tag=r21&monomerid=50480498&enzyme=3C-like+proteinase+%283CL-PRO%29&column=ki&startPg=0&Increment=50&submit=Search	45272299
51171117	CC(C)C[C@H](NC(=O)[C@@H](NC(=O)OCc1ccccc1)C(C)C)C(=O)N[C@@H](CCC(=O)c1nccs1)C(=O)c1nccs1	VGITXZVHGCSOCS-FIXSFTCYSA-N	CHEMBL541707	3C-like proteinase (3CL-PRO)	Human SARS coronavirus	45200				10.1016/j.bmcl.2009.03.118	http://www.bindingdb.org/jsp/dbsearch/PrimarySearch_ki.jsp?energyterm=kJ/mole&tag=r21&monomerid=50480499&enzyme=3C-like+proteinase+%283CL-PRO%29&column=ki&startPg=0&Increment=50&submit=Search	45269765
51171118	CCN(CC)C(=O)CC[C@H](NC(=O)[C@H](CC(C)C)NC(=O)[C@@H](NC(=O)OCc1ccccc1)C(C)C)C(=O)c1nc2ccccc2s1	PBXSOQBUMLQGGE-VWYPKUQYSA-N	CHEMBL538957	3C-like proteinase (3CL-PRO)	Human SARS coronavirus	49300				10.1016/j.bmcl.2009.03.118	http://www.bindingdb.org/jsp/dbsearch/PrimarySearch_ki.jsp?energyterm=kJ/mole&tag=r21&monomerid=50480500&enzyme=3C-like+proteinase+%283CL-PRO%29&column=ki&startPg=0&Increment=50&submit=Search	45273180
51171119	CC(C)C[C@H](NC(=O)[C@@H](NC(=O)[C@H](C)NC(=O)OCc1ccccc1)C(C)C)C(=O)N[C@@H](CCC(N)=O)C(=O)C(F)(F)F	SPQZOUWJRCAIEO-UTYWTXRGSA-N	CHEMBL553172	3C-like proteinase (3CL-PRO)	Human SARS coronavirus	135000				10.1016/j.bmcl.2009.03.118	http://www.bindingdb.org/jsp/dbsearch/PrimarySearch_ki.jsp?energyterm=kJ/mole&tag=r21&monomerid=50480501&enzyme=3C-like+proteinase+%283CL-PRO%29&column=ki&startPg=0&Increment=50&submit=Search	45273174
51172224	Oc1ccc(Cl)cc1C(=O)Nc1ccc(cc1Cl)[N+]([O-])=O	RJMUSRYZPJIFPJ-UHFFFAOYSA-N	5-chloro-N-(2-chloro-4-nitrophenyl)-2-hydroxybenzamide::med.21724, Compound 76::niclosamide	3C-like proteinase (3CL-PRO)	Human SARS coronavirus		40000			10.1016/j.bmc.2009.05.054	http://www.bindingdb.org/jsp/dbsearch/PrimarySearch_ki.jsp?energyterm=kJ/mole&tag=r21&monomerid=11242&enzyme=3C-like+proteinase+%283CL-PRO%29&column=ki&startPg=0&Increment=50&submit=Search	4477		DB06803	ZINC03874496
51173448	COC(=O)[C@]1(C)CC[C@]2(C)CC[C@]3(C)C4=CC=C5C(C)=C(O)C(=O)C=C5[C@]4(C)CC[C@@]3(C)[C@@H]2C1	JFACETXYABVHFD-WXPPGMDDSA-N	CHEBI:8416::GNF-Pf-476::PRISTIMERIN::Pristimerine	3C-like proteinase (3CL-PRO)	Human SARS coronavirus		5500			10.1016/j.bmcl.2010.01.152	http://www.bindingdb.org/jsp/dbsearch/PrimarySearch_ki.jsp?energyterm=kJ/mole&tag=r21&monomerid=50481947&enzyme=3C-like+proteinase+%283CL-PRO%29&column=ki&startPg=0&Increment=50&submit=Search	159516
51173449	C[C@@H]1C[C@@H]2[C@@](C)(CC[C@]3(C)C4=CC=c5c(cc(O)c(O)c5=C)[C@]4(C)CC[C@@]23C)CC1=O	SKVJQFWXXPFAQN-GWJSGULQSA-N	(6bS,8aS,11R,12aR,12bS,14aR)-3-Hydroxy-4,6b,8a,11,12b,14a-hexamethyl-7,8,8a,11,12,12a,12b,13,14,14a-decahydro-6bH,9H-picene-2,10-dione::CHEMBL432519::TINGENONE	3C-like proteinase (3CL-PRO)	Human SARS coronavirus		9900			10.1016/j.bmcl.2010.01.152	http://www.bindingdb.org/jsp/dbsearch/PrimarySearch_ki.jsp?energyterm=kJ/mole&tag=r21&monomerid=50071055&enzyme=3C-like+proteinase+%283CL-PRO%29&column=ki&startPg=0&Increment=50&submit=Search	91930989	CHEMBL432519		ZINC05760627
51173450	CC1=CC[C@]2(C)CC[C@]3(C)C4=CC=C5C(C)=C(O)C(=O)C=C5[C@]4(C)CC[C@@]3(C)[C@@H]2C1	FLMDVQMCMIGPEK-IPTPSVHJSA-N	IGUESTERIN::Iguesterin	3C-like proteinase (3CL-PRO)	Human SARS coronavirus		2600			10.1016/j.bmcl.2010.01.152	http://www.bindingdb.org/jsp/dbsearch/PrimarySearch_ki.jsp?energyterm=kJ/mole&tag=r21&monomerid=50481948&enzyme=3C-like+proteinase+%283CL-PRO%29&column=ki&startPg=0&Increment=50&submit=Search	46881919
51173451	COc1cc(C=CC(=O)CC(=O)C=Cc2ccc(O)c(OC)c2)ccc1O	VFLDPWHFBUODDF-UHFFFAOYSA-N	((E,E)-1,7-bis(4-hydroxy-3-methoxyphenyl)-1,6-heptadiene-3,5-dione)::(1E,4Z,6E)-5-Hydroxy-1,7-bis-(4-hydroxy-3-methoxy-phenyl)-hepta-1,4,6-trien-3-one::(1E,4Z,6E)-5-hydroxy-1,7-bis(4-hydroxy-3-methoxyphenyl)hepta-1,4,6-trien-3-one::(1E,6E)-1,7-Bis-(4-hydroxy-3-methoxy-phenyl)-hepta-1,6-diene-3,5-dione::(1E,6E)-1,7-bis(4-hydroxy-3-methoxyphenyl)-1,6-heptadiene-3,5-dione::(1E,6E)-1,7-bis(4-hydroxy-…	3C-like proteinase (3CL-PRO)	Human SARS coronavirus		23500			10.1016/j.bmcl.2010.01.152	http://www.bindingdb.org/jsp/dbsearch/PrimarySearch_ki.jsp?energyterm=kJ/mole&tag=r21&monomerid=50067040&enzyme=3C-like+proteinase+%283CL-PRO%29&column=ki&startPg=0&Increment=50&submit=Search	969516	CHEMBL116438		ZINC00899824
51173452	C[C@]12CC[C@](C)(C[C@H]1[C@]1(C)CC[C@]3(C)C(=CC=c4c3cc(O)c(O)c4=C)[C@@]1(C)CC2)C(O)=O	SYLIRTRYLBYOBO-JJWQIEBTSA-N	(2R,4aS,6aS,12bR,14aS,14bR)-10-Hydroxy-2,4a,6a,9,12b,14a-hexamethyl-11-oxo-1,2,3,4,4a,5,6,6a,11,12b,13,14,14a,14b-tetradecahydro-picene-2-carboxylic acid::CELASTROL::CHEMBL301982::cid_4274774	3C-like proteinase (3CL-PRO)	Human SARS coronavirus	4200				10.1016/j.bmcl.2010.01.152	http://www.bindingdb.org/jsp/dbsearch/PrimarySearch_ki.jsp?energyterm=kJ/mole&tag=r21&monomerid=50071058&enzyme=3C-like+proteinase+%283CL-PRO%29&column=ki&startPg=0&Increment=50&submit=Search	91408393	CHEMBL301982		ZINC19795938
51173453	C[C@@H]1C[C@@H]2[C@@](C)(CC[C@]3(C)C4=CC=c5c(cc(O)c(O)c5=C)[C@]4(C)CC[C@@]23C)CC1=O	SKVJQFWXXPFAQN-GWJSGULQSA-N	(6bS,8aS,11R,12aR,12bS,14aR)-3-Hydroxy-4,6b,8a,11,12b,14a-hexamethyl-7,8,8a,11,12,12a,12b,13,14,14a-decahydro-6bH,9H-picene-2,10-dione::CHEMBL432519::TINGENONE	3C-like proteinase (3CL-PRO)	Human SARS coronavirus	4000				10.1016/j.bmcl.2010.01.152	http://www.bindingdb.org/jsp/dbsearch/PrimarySearch_ki.jsp?energyterm=kJ/mole&tag=r21&monomerid=50071055&enzyme=3C-like+proteinase+%283CL-PRO%29&column=ki&startPg=0&Increment=50&submit=Search	91930989	CHEMBL432519		ZINC05760627
51173454	CC1=CC[C@]2(C)CC[C@]3(C)C4=CC=C5C(C)=C(O)C(=O)C=C5[C@]4(C)CC[C@@]3(C)[C@@H]2C1	FLMDVQMCMIGPEK-IPTPSVHJSA-N	IGUESTERIN::Iguesterin	3C-like proteinase (3CL-PRO)	Human SARS coronavirus	800				10.1016/j.bmcl.2010.01.152	http://www.bindingdb.org/jsp/dbsearch/PrimarySearch_ki.jsp?energyterm=kJ/mole&tag=r21&monomerid=50481948&enzyme=3C-like+proteinase+%283CL-PRO%29&column=ki&startPg=0&Increment=50&submit=Search	46881919
51173455	C[C@]12CC[C@](C)(C[C@H]1[C@]1(C)CC[C@]3(C)C(=CC=c4c3cc(O)c(O)c4=C)[C@@]1(C)CC2)C(O)=O	SYLIRTRYLBYOBO-JJWQIEBTSA-N	(2R,4aS,6aS,12bR,14aS,14bR)-10-Hydroxy-2,4a,6a,9,12b,14a-hexamethyl-11-oxo-1,2,3,4,4a,5,6,6a,11,12b,13,14,14a,14b-tetradecahydro-picene-2-carboxylic acid::CELASTROL::CHEMBL301982::cid_4274774	3C-like proteinase (3CL-PRO)	Human SARS coronavirus		10300			10.1016/j.bmcl.2010.01.152	http://www.bindingdb.org/jsp/dbsearch/PrimarySearch_ki.jsp?energyterm=kJ/mole&tag=r21&monomerid=50071058&enzyme=3C-like+proteinase+%283CL-PRO%29&column=ki&startPg=0&Increment=50&submit=Search	91408393	CHEMBL301982		ZINC19795938
51173456	Cc1c(O)c(O)cc2c1CC=C1[C@@]2(C)CC[C@@]2(C)[C@@H]3C[C@@](C)(CC[C@]3(C)CC[C@]12C)C(O)=O	WZAUFGYINZYCKH-JJWQIEBTSA-N	DIHYDROCELASTROL::Dihydrocelastrol	3C-like proteinase (3CL-PRO)	Human SARS coronavirus		21700			10.1016/j.bmcl.2010.01.152	http://www.bindingdb.org/jsp/dbsearch/PrimarySearch_ki.jsp?energyterm=kJ/mole&tag=r21&monomerid=50481949&enzyme=3C-like+proteinase+%283CL-PRO%29&column=ki&startPg=0&Increment=50&submit=Search	10411574
51173457	COC(=O)[C@]1(C)CC[C@]2(C)CC[C@]3(C)C4=CC=C5C(C)=C(O)C(=O)C=C5[C@]4(C)CC[C@@]3(C)[C@@H]2C1	JFACETXYABVHFD-WXPPGMDDSA-N	CHEBI:8416::GNF-Pf-476::PRISTIMERIN::Pristimerine	3C-like proteinase (3CL-PRO)	Human SARS coronavirus	3100				10.1016/j.bmcl.2010.01.152	http://www.bindingdb.org/jsp/dbsearch/PrimarySearch_ki.jsp?energyterm=kJ/mole&tag=r21&monomerid=50481947&enzyme=3C-like+proteinase+%283CL-PRO%29&column=ki&startPg=0&Increment=50&submit=Search	159516
51175508	CC(C)c1cc2CC[C@H]3[C@](C)(CO)CCC[C@]3(C)c2cc1O	ZSMYLYMVTJVQIR-SLFFLAALSA-N	18-HYDROXYFERRUGINOL::18-Hydroxyferruginol	3C-like proteinase (3CL-PRO)	Human SARS coronavirus		220800			10.1016/j.bmc.2010.09.035	http://www.bindingdb.org/jsp/dbsearch/PrimarySearch_ki.jsp?energyterm=kJ/mole&tag=r21&monomerid=50483051&enzyme=3C-like+proteinase+%283CL-PRO%29&column=ki&startPg=0&Increment=50&submit=Search	21582568
51175509	CC(C)c1cc2CC[C@H]3C(C)(C)[C@@H](O)CC[C@]3(C)c2cc1O	ODFCWXVQZAQDSO-CMKODMSKSA-N	HINOKIOL::Hinokiol	3C-like proteinase (3CL-PRO)	Human SARS coronavirus		233400			10.1016/j.bmc.2010.09.035	http://www.bindingdb.org/jsp/dbsearch/PrimarySearch_ki.jsp?energyterm=kJ/mole&tag=r21&monomerid=50483052&enzyme=3C-like+proteinase+%283CL-PRO%29&column=ki&startPg=0&Increment=50&submit=Search	12310492
51175510	COC(=O)[C@]1(C)CCC[C@@]2(C)[C@H]1CCc1cc(ccc21)C(C)C	PGZCJOPTDHWYES-HMXCVIKNSA-N	METHYL DEHYDROABIETATE::Methyl Dehydroabietate	3C-like proteinase (3CL-PRO)	Human SARS coronavirus		207000			10.1016/j.bmc.2010.09.035	http://www.bindingdb.org/jsp/dbsearch/PrimarySearch_ki.jsp?energyterm=kJ/mole&tag=r21&monomerid=50483053&enzyme=3C-like+proteinase+%283CL-PRO%29&column=ki&startPg=0&Increment=50&submit=Search	14697
51175511	C[C@@]1(CC[C@H]2C(C1)=CC[C@@H]1[C@]2(C)CCC[C@@]1(C)C(O)=O)C=C	HDWPMPWOTAUENM-QOCHGBHMSA-N	CHEBI:6039::ISOPIMARIC ACID::Isopimaric Acid	3C-like proteinase (3CL-PRO)	Human SARS coronavirus		283500			10.1016/j.bmc.2010.09.035	http://www.bindingdb.org/jsp/dbsearch/PrimarySearch_ki.jsp?energyterm=kJ/mole&tag=r21&monomerid=50340651&enzyme=3C-like+proteinase+%283CL-PRO%29&column=ki&startPg=0&Increment=50&submit=Search	442048			ZINC71315933
51175512	C\C(CC[C@H]1C(=C)CC[C@H]2[C@](C)(CO)CCC[C@]12C)=C\CO	MJHWZTRFACWHTA-COPBVACWSA-N	KAYADIOL::Kayadiol	3C-like proteinase (3CL-PRO)	Human SARS coronavirus		137700			10.1016/j.bmc.2010.09.035	http://www.bindingdb.org/jsp/dbsearch/PrimarySearch_ki.jsp?energyterm=kJ/mole&tag=r21&monomerid=50483054&enzyme=3C-like+proteinase+%283CL-PRO%29&column=ki&startPg=0&Increment=50&submit=Search	52948928
51175513	COc1ccc(cc1)-c1cc(=O)c2c(O)cc(O)c(-c3cc(ccc3OC)-c3cc(O)c4c(cc(OC)cc4=O)o3)c2o1	QVCSRVASXGHFAQ-UHFFFAOYSA-N	CHEMBL208908::sciadopitisin::sciadopitysin	3C-like proteinase (3CL-PRO)	Human SARS coronavirus		38400			10.1016/j.bmc.2010.09.035	http://www.bindingdb.org/jsp/dbsearch/PrimarySearch_ki.jsp?energyterm=kJ/mole&tag=r21&monomerid=50323206&enzyme=3C-like+proteinase+%283CL-PRO%29&column=ki&startPg=0&Increment=50&submit=Search	5281696	CHEMBL208908		ZINC01531697
51175514	Oc1cc(O)c2c(c1)oc(cc2=O)-c1ccc(O)c(O)c1	IQPNAANSBPBGFQ-UHFFFAOYSA-N	2-(3,4-dihydroxyphenyl)-5,7-dihydroxy-4H-chromen-4-one::2-(3,4-dihydroxyphenyl)-5,7-dihydroxy-chromen-4-one::CHEMBL151::Luteolin (27)::Luteolin (4)::cid_5280445::luteolin::med.21724, Compound 3	3C-like proteinase (3CL-PRO)	Human SARS coronavirus		20000			10.1016/j.bmc.2010.09.035	http://www.bindingdb.org/jsp/dbsearch/PrimarySearch_ki.jsp?energyterm=kJ/mole&tag=r21&monomerid=7459&enzyme=3C-like+proteinase+%283CL-PRO%29&column=ki&startPg=0&Increment=50&submit=Search	5280445	CHEMBL151		ZINC18185774
51175515	Oc1cc(O)c2c(c1)oc(-c1ccc(O)c(O)c1)c(O)c2=O	REFJWTPEDVJJIY-UHFFFAOYSA-N	2-(3,4-dihydroxyphenyl)-3,5,7-trihydroxy-4H-chromen-4-one::2-(3,4-dihydroxyphenyl)-3,5,7-trihydroxy-chromen-4-one::2-(3,4-dihydroxyphenyl)-3,5,7-trihydroxy-chromone;hydrate::CHEMBL50::Quercetin::Quercetin (10)::Quercetin (21)::Quercetin (Qur)::US9180183, Quercetin::med.21724, Compound 4	3C-like proteinase (3CL-PRO)	Human SARS coronavirus		23800			10.1016/j.bmc.2010.09.035	http://www.bindingdb.org/jsp/dbsearch/PrimarySearch_ki.jsp?energyterm=kJ/mole&tag=r21&monomerid=7460&enzyme=3C-like+proteinase+%283CL-PRO%29&column=ki&startPg=0&Increment=50&submit=Search	5280343	CHEMBL50	DB04216	ZINC03869685
51175516	Oc1ccc(cc1)-c1cc(=O)c2c(O)cc(O)c(-c3cc(ccc3O)-c3cc(O)c4c(cc(O)cc4=O)o3)c2o1	QYDURWHTEIUTEI-UHFFFAOYSA-N	2-(3-(5,7-dihydroxy-2-(4-hydroxyphenyl)-4-oxo-4H-chromen-8-yl)-4-hydroxyphenyl)-5,7-dihydroxy-4H-chromen-4-one::8-[5-(5,7-Dihydroxy-4-oxo-4H-chromen-2-yl)-2-hydroxy-phenyl]-5,7-dihydroxy-2-(4-hydroxy-phenyl)-chromen-4-one::Amentoflavone::CHEMBL63354::cid_5281600	3C-like proteinase (3CL-PRO)	Human SARS coronavirus	13800				10.1016/j.bmc.2010.09.035	http://www.bindingdb.org/jsp/dbsearch/PrimarySearch_ki.jsp?energyterm=kJ/mole&tag=r21&monomerid=50129952&enzyme=3C-like+proteinase+%283CL-PRO%29&column=ki&startPg=0&Increment=50&submit=Search	5281600	CHEMBL63354		ZINC03984030
[truncated: 115 more rows]

## Sheet: BindingDB DataPoints-DrugHits
BindingDB Reactant_set_id	Ligand SMILES	Ligand InChI Key	BindingDB Ligand Name	Target Name Assigned by Curator or DataSource	Target Source Organism According to Curator or DataSource	Ki (nM)	IC50 (nM)	Kd (nM)	EC50 (nM)	Article DOI	Link to Ligand-Target Pair in BindingDB	PubChem CID	ChEMBL ID of Ligand	DrugBank ID of Ligand	ZINC ID of Ligand
[truncated: 149 more rows]
